# Supplementary material
Source: publisher figshare collection journal article supplement (https://tandf.figshare.com/articles/dataset/_/6276215)
Supplement: Supplementary file 1 [file 1]

Archive with 3 entries (3 files):
- taje_a_1447998_sm7630.xlsx
- taje_a_1447998_sm7629.xlsx
- taje_a_1447998_sm7628.pdf
