# Supplementary material
Source: publisher figshare collection journal article supplement (https://tandf.figshare.com/articles/dataset/_/6276215)
Supplement: Supplementary file 1 [file 1 › taje_a_1447998_sm7630.xlsx]

## Sheet: Appendix 4
Siégel et al. (2018). Supplementary papers. Australian Journal of Earth Sciences, 65, https://doi.org/10.1080/08120099.2018.1447998
Appendix 4. Results – Hf isotope in zircon. (Excel workbook)
Analysis No	Age Ma (206Pb/238U)a	176Lu/177Hf	"+/-" 2s b	176Hf/177Hf	"+/-" 2 s b	176Hf/177Hf (t) c	ɛHf(t) c	"+/-" 2 s b	TDM2 (Ma) c
EASTERN THOMSON OROGEN
BAL-01
GA6217_2132573 AOP_1	396	0.001063	1.62713e-05	0.282576	6.49842e-05	0.282573	1.32542	2.29801	1200.46
GA6217_2132573 AOP_2	396	0.000985	1.77976e-05	0.282559	6.34661e-05	0.282557	0.744215	2.24432	1233.9
GA6217_2132573 AOP_4	396	0.000921	4.24471e-05	0.28258	6.55129e-05	0.282578	1.50429	2.3167	1190.16
GA6217_2132573 AOP_6	396	0.00123	6.39512e-05	0.282542	6.71636e-05	0.282538	0.0781722	2.37508	1272.2
GA6217_2132573 AOP_8	396	0.001135	3.10122e-05	0.282561	6.8315e-05	0.282558	0.775605	2.41579	1232.09
GA6217_2132573 AOP_10	396	0.001299	1.77976e-05	0.282521	6.2056e-05	0.282516	-0.683219	2.19446	1315.94
GA6217_2132573 AOP_13	396	0.001076	5.11933e-05	0.282566	6.44666e-05	0.282563	0.96807	2.2797	1221.02
GA6217_2132573 AOP_19	396	0.001104	5.51068e-05	0.282521	6.44666e-05	0.282518	-0.632003	2.2797	1313
GA6217_2132573 AOP_20	396	0.001367	2.02424e-05	0.282547	6.44666e-05	0.282542	0.219158	2.2797	1264.09
GA6217_2132573 AOP_22	396	0.001027	3.66845e-05	0.282552	6.49842e-05	0.282549	0.485427	2.29801	1248.78
GA6217_2132573 AOP_27	396	0.001199	6.78952e-05	0.282533	6.89053e-05	0.282529	-0.23223	2.43667	1290.04
GA6217_2132573 AOP_28	396	0.001422	1.94102e-05	0.282561	6.66029e-05	0.282555	0.700225	2.35525	1236.43
GA6217_2132573 AOP_29	396	0.001034	2.02424e-05	0.28258	6.44666e-05	0.282577	1.47461	2.2797	1191.87
GA6217_2132573 AOP_30	396	0.000709	1.70222e-05	0.282594	6.03568e-05	0.282594	2.05549	2.13437	1158.42
NORTHERN SUBSURFACE THOMSON OROGEN
BUD-01
GA6217_2132574 AOD_1	476.9	0.001161	2.91506e-05	0.282106	6.25135e-05	0.282101	-13.5895	2.21064	2118.23
GA6217_2132574 AOD_2	476.9	0.0009	3.00792e-05	0.282177	6.29837e-05	0.282174	-10.9935	2.22726	1970.94
GA6217_2132574 AOD_3	476.9	0.000732	2.91506e-05	0.282187	6.71636e-05	0.282185	-10.5863	2.37508	1947.81
GA6217_2132574 AOD_4-cN	476.9	0.000818	2.63961e-05	0.282178	6.49842e-05	0.282176	-10.9321	2.29801	1967.46
GA6217_2132574 AOD_4-rS	476.9	0.000686	1.62713e-05	0.282125	6.16112e-05	0.282124	-12.7665	2.17873	2071.58
GA6217_2132574 AOD_5	476.9	0.00105	0.000140431	0.282187	6.8315e-05	0.282183	-10.6869	2.41579	1953.53
GA6217_2132574 AOD_6	476.9	0.001359	5.7068e-05	0.282141	6.2056e-05	0.282134	-12.4132	2.19446	2051.54
GA6217_2132574 AOD_8	476.9	0.000866	3.9557e-05	0.282161	6.71636e-05	0.282158	-11.5491	2.37508	2002.5
GA6217_2132574 AOD_9	476.9	0.001115	4.72943e-05	0.282151	6.60526e-05	0.282146	-11.9819	2.33579	2027.07
GA6217_2132574 AOD_10	476.9	0.0003498	1.46576e-05	0.282191	6.07614e-05	0.282193	-10.3237	2.14868	1932.88
GA6217_2132574 AOD_11	476.9	0.000979	1.94102e-05	0.282146	6.39605e-05	0.282142	-12.1159	2.26181	2034.67
GA6217_2132574 AOD_11X	476.9	0.000925	2.82269e-05	0.282167	6.34661e-05	0.282164	-11.3554	2.24432	1991.5
GA6217_2132574 AOD_13	476.9	0.000811	2.73085e-05	0.282161	6.39605e-05	0.282159	-11.5317	2.26181	2001.51
GA6217_2132574 AOD_17	476.9	0.00102	2.54903e-05	0.282134	6.2056e-05	0.28213	-12.5537	2.19446	2059.51
GA6217_2132574 AOD_18	476.9	0.000736	3.85974e-05	0.282138	6.29837e-05	0.282136	-12.3221	2.22726	2046.38
GA6217_2132574 AOD_20	476.9	0.000947	2.73085e-05	0.282173	6.2056e-05	0.28217	-11.1499	2.19446	1979.83
GA6217_2132574 AOD_21	476.9	0.001144	3.38342e-05	0.282141	6.25135e-05	0.282136	-12.3451	2.21064	2047.68
GA6217_2132574 AOD_22	476.9	0.000761	2.45918e-05	0.282166	6.34661e-05	0.282164	-11.3389	2.24432	1990.56
GA6217_2132574 AOD_23	476.9	0.001168	5.41272e-05	0.282148	6.44666e-05	0.282143	-12.1049	2.2797	2034.05
GA6217_2132574 AOD_24	476.9	0.000758	5.6087e-05	0.28215	7.13579e-05	0.282148	-11.9043	2.5234	2022.67
STO-01
GA6217_2132575 LOL_1	477.9	0.001235	8.57074e-05	0.282143	7.13579e-05	0.282137	-12.2816	2.5234	2044.89
GA6217_2132575 LOL_3	477.9	0.0011849	1.35925e-05	0.282118	6.29837e-05	0.282112	-13.1507	2.22726	2094.18
GA6217_2132575 LOL_4	477.9	0.001219	5.31484e-05	0.282178	9.2428e-05	0.282172	-11.0375	3.26849	1974.26
GA6217_2132575 LOL_5	477.9	0.00124	2.54903e-05	0.282126	6.60526e-05	0.28212	-12.885	2.33579	2079.11
GA6217_2132575 LOL_8	477.9	0.000782	2.45918e-05	0.282139	7.13579e-05	0.282137	-12.2795	2.5234	2044.77
GA6217_2132575 LOL_11	477.9	0.000574	2.10892e-05	0.282117	7.01138e-05	0.282117	-12.9923	2.4794	2085.2
GA6217_2132575 LOL_13	477.9	0.001252	4.53515e-05	0.282121	6.66029e-05	0.282115	-13.0658	2.35525	2089.36
GA6217_2132575 LOL_19	477.9	0.001223	4.05186e-05	0.282173	6.8315e-05	0.282167	-11.2158	2.41579	1984.39
GA6217_2132575 LOL_20 no O spot	477.9	0.001369	2.63961e-05	0.282155	7.01138e-05	0.282148	-11.8993	2.4794	2023.2
GA6217_2132575 LOL_25	477.9	0.00119	3.19493e-05	0.282144	6.71636e-05	0.282138	-12.2319	2.37508	2042.07
GA6217_2132575 LOL_27	477.9	0.0005721	1.28703e-05	0.282128	6.29837e-05	0.282128	-12.6023	2.22726	2063.08
GA6217_2132575 LOL_29	477.9	0.000791	4.24471e-05	0.282162	5.99662e-05	0.28216	-11.4681	2.12056	1998.72
GA6217_2132575 LOL_31	477.9	0.000808	2.91506e-05	0.282164	6.25135e-05	0.282162	-11.4027	2.21064	1995
SOUTHWESTERN THOMSON OROGEN
WOL-01
GA6217_2132576 DIO_1	419	0.00212	0.000120502	0.282464	6.39605e-05	0.282452	-2.43432	2.26181	1435.2
GA6217_2132576 DIO_2	419	0.001869	9.2654e-05	0.282454	6.71636e-05	0.282444	-2.71851	2.37508	1451.49
GA6217_2132576 DIO_3	419	0.00218	0.000110548	0.282519	6.9505e-05	0.282507	-0.504243	2.45787	1324.44
GA6217_2132576 DIO_7	419	0.002833	6.98696e-05	0.282509	7.52857e-05	0.282492	-1.03972	2.6623	1355.19
GA6217_2132576 DIO_9	419	0.001907	8.76913e-05	0.282491	6.39605e-05	0.282481	-1.41943	2.26181	1376.99
GA6217_2132576 DIO_10	419	0.00231	0.000100602	0.282559	6.9505e-05	0.282546	0.875443	2.45787	1245.12
GA6217_2132576 DIO_11	419	0.001197	7.28338e-05	0.282417	6.2056e-05	0.282413	-3.84134	2.19446	1515.8
GA6217_2132576 DIO_12 no O spot	419	0.00264	0.000420144	0.2826	8.2389e-05	0.282584	2.23493	2.91348	1166.85
GA6217_2132576 DIO_13	419	0.0023	0.000220274	0.282518	0.000103976	0.282505	-0.572996	3.67685	1328.39
GA6217_2132576 DIO_14	419	0.00183	0.000120502	0.282584	6.9505e-05	0.282575	1.89376	2.45787	1186.5
GA6217_2132576 DIO_15	419	0.00149	0.000200302	0.282462	6.39605e-05	0.282455	-2.32999	2.26181	1429.22
GA6217_2132576 DIO_16	419	0.001043	3.38342e-05	0.282521	6.55129e-05	0.282518	-0.117393	2.3167	1302.21
GA6217_2132576 DIO_17	419	0.00095	5.7068e-05	0.282482	8.09194e-05	0.28248	-1.47197	2.86152	1380
GA6217_2132576 DIO_23	419	0.001639	4.72943e-05	0.282486	6.66029e-05	0.282478	-1.52191	2.35525	1382.87
GA6217_2132576 DIO_26	419	0.001625	3.10122e-05	0.282538	6.34661e-05	0.28253	0.322549	2.24432	1276.92
a U-Pb SHRIMP age
b Uncertainties are quadratic additions of the daily reproducibility of standard 91500 and the internal error
c calculated using chondritic values of (176Lu/177Hf)0=0.0336 and (176Hf/177Hf)0=0.282785 (Bouvier et al., 2008), a decay constant of 1.867E-5 (Soderlund et al., 2004), depleted mantle values of (176Lu/177Hf)0=0.0384 and (176Hf/177Hf)0=0.28324 (Griffin et al., 2000), and a (176Lu/177Hf)0 of the average crust of 0.0125 (Chauvel et al., 2014)

## Sheet: Appendix 5
Siégel et al. (2018). Supplementary papers. Australian Journal of Earth Sciences, 65, https://doi.org/10.1080/08120099.2018.1447998
Appendix 5. Results – O isotope in zircon. (Excel workbook)
Grain.spot	18O/16O measured	95%T_err	d18O/16O ‰	Internal Errors ‰	External Errors ‰
EASTERN THOMSON OROGEN
BAL-01; 2132573 AOP Balfour 1
2.1	0.0020398	1.16e-07	6.07019	0.0569948	0.267478
4.1	0.00203879	1.47e-07	5.5758	0.0719811	0.271067
6.1	0.00204055	1.25e-07	6.43825	0.0613421	0.268437
8.1	0.00203832	1.82e-07	5.34385	0.089194	0.276137
10.1	0.00203904	1.71e-07	5.69791	0.0839092	0.274475
13.1	0.00203944	1.82e-07	5.89424	0.0894717	0.276226
19.1	0.00203895	2.46e-07	5.65404	0.120725	0.287872
20.1	0.00203963	2.18e-07	5.98841	0.107063	0.282415
21.1	0.00204003	1.46e-07	6.18152	0.0715943	0.270964
22.1	0.00203886	1.32e-07	5.61059	0.0645245	0.269183
27.1	0.00203838	1.92e-07	5.37545	0.0939677	0.277715
28.1	0.00203875	1.28e-07	5.55807	0.0627279	0.268758
29.1	0.00203908	2.25e-07	5.71677	0.1104	0.283697
30.1	0.00203876	1.45e-07	5.56224	0.0711928	0.270858
			Average	1 sigma	External error
			5.76195	0.313565	0.41
NORTHERN SUBSURFACE THOMSON OROGEN
BUD-01; 2132574 AOD Budgerygar 1
2.1	0.00204365	2.11e-07	7.95305	0.103042	0.280915
3.1	0.00204411	1.12e-07	8.18014	0.0546611	0.26699
4.1	0.00204196	3.65e-07	7.12709	0.178958	0.316736
4.2	0.00204468	1.79e-07	8.45866	0.0873452	0.275545
5.1	0.00204433	1.23e-07	8.28443	0.0599648	0.268126
6.1	0.00204341	1.88e-07	7.83622	0.0919607	0.277043
8.1	0.0020436	1.4e-07	7.93058	0.0683527	0.270126
9.1	0.0020433	1.05e-07	7.78268	0.0513697	0.266336
10.1	0.00204416	1.61e-07	8.20372	0.0786405	0.27291
11.1	0.00203965	8.9e-08	5.99864	0.0434718	0.264926
13.1	0.00204407	1.76e-07	8.16179	0.0862579	0.275202
17.1	0.00204379	1.26e-07	8.02324	0.0616924	0.268518
18.1	0.00204264	2.3e-07	7.46124	0.112398	0.284481
20.1	0.00204385	2.5e-07	8.04959	0.122451	0.2886
21.1	0.00204346	1.47e-07	7.85829	0.0720201	0.271077
22.1	0.00204359	1.39e-07	7.9229	0.0681799	0.270082
23.1	0.00204281	9.9e-08	7.54181	0.0483203	0.265764
24.1	0.00204487	1.23e-07	8.55296	0.0602398	0.268188
			Average	1 sigma	External error
			7.8515	0.577925	0.63
STO-01; 2132575 LOL Stormhill 1
1.1	0.00204444	2.36e-07	8.3398	0.115282	0.285632
3.1	0.00204313	1.24e-07	7.69944	0.0606534	0.268281
4.1	0.00204486	1.94e-07	8.54579	0.09468	0.277957
5.1	0.00204417	1.42e-07	8.2084	0.0694851	0.270414
8.1	0.00204532	1.3e-07	8.77103	0.0634744	0.268933
11.1	0.00204461	1.82e-07	8.42553	0.0891342	0.276117
13.1	0.00204545	1.23e-07	8.83459	0.0601049	0.268157
19.1	0.0020422	1.34e-07	7.24534	0.0657959	0.26949
20.1	0.00204375	1.84e-07	8.00295	0.0901827	0.276457
25.1	0.00203952	2.84e-07	5.93526	0.139035	0.296018
27.1	0.00204533	1.44e-07	8.77523	0.0705268	0.270684
29.1	0.00204358	2.37e-07	7.92071	0.115823	0.285851
31.1	0.00204442	1.34e-07	8.32932	0.0655285	0.269425
			Average	1 sigma	External error
			8.07949	0.789804	0.83
SOUTHWESTERN THOMSON OROGEN
WOL-01; 2132576 DIO Wolgolla 1
1.1	0.00204245	1.5e-07	7.36882	0.0736717	0.27152
2.1	0.00204511	2.39e-07	8.66805	0.116646	0.286185
3.1	0.00204506	1.69e-07	8.64111	0.0826189	0.274083
7.1	0.00204342	2.81e-07	7.8394	0.137626	0.295359
9.1	0.00204279	9.8e-08	7.5351	0.0480562	0.265716
10.1	0.00204125	2.24e-07	6.77726	0.109926	0.283513
11.1	0.00204486	1.23e-07	8.54697	0.0603799	0.268219
12.1	0.00204486	1.69e-07	8.54659	0.0826368	0.274089
13.1	0.00204103	1.69e-07	6.67086	0.0829981	0.274198
14.1	0.00204486	1.98e-07	8.54657	0.0968201	0.278693
15.1	0.00204273	2.27e-07	7.50465	0.110965	0.283917
17.1	0.00204508	2.08e-07	8.6556	0.101724	0.280435
21.1	0.00204369	1.27e-07	7.97225	0.0623379	0.268667
23.1	0.00204297	1.3e-07	7.62225	0.0636531	0.268975
26.1	0.00204327	1.38e-07	7.76762	0.0674022	0.269887
			Average	1 sigma	External error
			7.91087	0.676625	0.73
