# Supplementary material
Source: publisher figshare collection journal article supplement (https://tandf.figshare.com/articles/dataset/_/6276215)
Supplement: Supplementary file 1 [file taje_a_1447998_sm7629.xlsx]

## Sheet: Zircon-LA-ICP-MS-core-samples
Siégel et al. (2018). Supplementary papers. Australian Journal of Earth Sciences, 65, https://doi.org/10.1080/08120099.2018.1447998
Appendix 2. Results – zircon U–Pb dating LA-ICP-MS & SHRIMP.
			Data for Wetherill plot (data not corrected for common Pb)					Data for Tera-Wasserburg plot (data not corrected for common Pb)					data corrected for common Pb (208Pb correction)									Dates													Preferred choice								Zircon composition
Analysis name	Integration number	Duration (s)	207Pb/235U	2s abs. prop.	206Pb/238U	2s abs. prop.	Error correlation	238U/206Pb	2s abs. prop.	207Pb/206Pb	2s abs. prop.	Error correlation	207Pb/235U	2s abs. prop.	206Pb/238U	2s abs. prop.	Error correlation	208Pb/232Th	2s abs. prop.	207Pb/206Pb	2s abs. prop.	208Pb/232Th age (Ma)	2s abs. int.	2s abs. prop.	207Pb/206Pb age (Ma)	2s abs. int.	2s. abs. prop.	206Pb/238U age (Ma)	2s abs. int.	2s abs. prop.	207Pb/235U age (Ma)	2s abs. int.	2s. abs. prop.	% Disc.	Overall best age (Ma)	2s. abs. prop.	207Pb/235U	2s abs. prop.	206Pb/238U	2s abs. prop.	Error correlation	Inclusions ?	P (ppm)	2s	Ti (ppm)	2s	Y (ppm)	2s	Zr (ppm)
EASTERN THOMSON OROGEN
BAL-01
Concordant-Autocrysts
BAL-01-01-02-c	Output_1_161	22.588	0.436	0.046	0.06258	0.0026	0.366405	15.9795	0.663899	0.0514	0.0058	0.345515	0.506381	0.046	0.0630986	0.0026	0.413089	0.01846	0.0027	0.0514	0.0058	369.6	8.3	54	260	100	240	391.3	4.7	16	366	14	33	6.91257	394.442	16	0.506381	0.046	0.0630986	0.0026	0.413089	Zircon	183.2	9.1	4.14	0.89	902	34	478500
BAL-01-01-02-r	Output_1_162	30.295	0.451	0.045	0.06087	0.0026	0.393545	16.4285	0.701725	0.0542	0.0057	0.376304	0.456186	0.045	0.0608824	0.0026	0.397291	0.019	0.0028	0.0542	0.0057	380.4	6.3	55	361	61	240	380.9	4.6	16	377.2	8.1	31	0.980912	380.989	16	0.456186	0.045	0.0608824	0.0026	0.397291	Zircon	246.2	7.9	5.79	0.99	996	21	456900
BAL-01-01-03-c	Output_1_163	27.637	0.477	0.053	0.0627	0.0027	0.36137	15.949	0.686797	0.0553	0.0065	0.344001	0.507235	0.053	0.0629415	0.0027	0.379784	0.01884	0.0029	0.0553	0.0065	377	16	57	430	120	250	391.7	6.3	17	396	19	38	1.08586	391.7	17	0.477	0.053	0.0627	0.0027	0.36137	Zircon	191.4	5.9	4.22	0.88	421.9	9.5	483300
BAL-01-01-05-c	Output_1_165	28.434	0.441	0.047	0.06192	0.0026	0.366564	16.1499	0.678128	0.0521	0.0058	0.352914	0.464981	0.047	0.0620876	0.0026	0.382745	0.01872	0.0028	0.0521	0.0058	375	10	55	280	100	240	387.2	4.7	16	369	14	33	4.93225	388.309	16	0.464981	0.047	0.0620876	0.0026	0.382745	Zircon	169.3	6.2	4.39	0.63	553.9	8	483100
BAL-01-2-01-r	Output_1_169	30.764	0.481	0.05	0.06323	0.0027	0.379976	15.8153	0.675332	0.0562	0.0063	0.355971	0.483513	0.05	0.0631788	0.0027	0.381937	0.01992	0.003	0.0562	0.0063	399	12	59	450	100	250	395.2	5.6	16	397	14	34	0.453401	395.2	16	0.481	0.05	0.06323	0.0027	0.379976	Zircon	117.7	7.2	2.66	0.55	336	16	468900
BAL-01-02-02-c	Output_1_170	16.355	0.476	0.053	0.0639	0.0029	0.377445	15.6494	0.710225	0.0552	0.0064	0.364502	0.507468	0.053	0.0640754	0.0029	0.397621	0.01944	0.0029	0.0552	0.0064	389	11	57	400	120	250	399.5	7.4	17	398	18	34	0.376884	399.5	17	0.476	0.053	0.0639	0.0029	0.377445	Zircon	283	44	4.5	0.99	582	16	493000
BAL-01-02-02-r	Output_1_171	43.614	0.45	0.045	0.06306	0.0026	0.381177	15.8579	0.653831	0.0522	0.0055	0.364409	0.454577	0.045	0.0630675	0.0026	0.384444	0.01967	0.0029	0.0522	0.0055	393.8	5.9	57	292	65	220	394.2	4.3	16	379.7	9.4	32	3.8188	394.254	16	0.454577	0.045	0.0630675	0.0026	0.384444	Zircon	195.4	6.5	4.1	0.68	689	13	479400
BAL-01-02-03-r	Output_1_172	26.48	0.5	0.055	0.0635	0.0027	0.360545	15.748	0.669601	0.0575	0.0066	0.347369	0.47635	0.055	0.0632793	0.0027	0.346633	0.02068	0.0031	0.0575	0.0066	414	13	61	480	110	250	396.8	4.9	16	409	18	37	2.98289	395.538	16	0.47635	0.055	0.0632793	0.0027	0.346633	Zircon	208.2	8.2	3.83	0.67	413	5.2	479700
BAL-01-02-04-r	Output_1_173	7.7882	0.48	0.05	0.0627	0.0029	0.405814	15.949	0.737671	0.0561	0.0062	0.386061	0.503883	0.05	0.0628571	0.0029	0.421604	0.01929	0.0029	0.0561	0.0062	386	11	57	446	91	240	392.1	8.7	18	398	14	35	1.48241	392.1	18	0.48	0.05	0.0627	0.0029	0.405814	Zircon	566	48	2.8	1.1	1108	26	443000
BAL-01-02-05-r	Output_1_174	26.091	0.445	0.046	0.06263	0.0026	0.37267	15.9668	0.66284	0.0525	0.0057	0.357145	0.445286	0.046	0.0625653	0.0026	0.373208	0.01977	0.0029	0.0525	0.0057	395.8	7.7	58	289	85	230	391.6	4.4	16	373	13	32	4.9866	391.208	16	0.445286	0.046	0.0625653	0.0026	0.373208	Zircon	277.7	9.6	3.68	0.71	607	17	484200
BAL-01-02-05-rx	Output_1_175	20.639	0.528	0.055	0.06447	0.0027	0.373028	15.5111	0.649604	0.0605	0.0067	0.353721	0.481419	0.055	0.0640089	0.0027	0.346364	0.02152	0.0032	0.0605	0.0067	430	10	63	591	95	240	402.7	3.8	16	429	15	36	6.13054	399.96	16	0.481419	0.055	0.0640089	0.0027	0.346364	Zircon	190.7	8	4.65	0.94	660	40	485400
BAL-01-02-07-c	Output_1_177	28.833	0.458	0.046	0.06199	0.0026	0.385348	16.1316	0.676597	0.0532	0.0058	0.359057	0.443932	0.046	0.061903	0.0026	0.375654	0.01953	0.0029	0.0532	0.0058	390.9	6.4	57	326	82	240	387.7	4	16	382	11	32	1.49215	387.7	16	0.458	0.046	0.06199	0.0026	0.385348	Zircon	209.1	8.6	3.89	0.7	950	110	473600
BAL-01-02-09-r	Output_1_179	31.094	0.446	0.046	0.06217	0.0026	0.375765	16.0849	0.672685	0.054	0.0059	0.357475	0.465589	0.046	0.0621939	0.0026	0.389679	0.01937	0.0028	0.054	0.0059	387.8	7.2	56	342	83	230	389.4	4.5	16	375	12	32	3.84	388.954	16	0.465589	0.046	0.0621939	0.0026	0.389679	Zircon	179.5	7.8	4.69	0.75	891	53	478700
BAL-01-02-10-r	Output_1_180	30.529	0.453	0.046	0.06348	0.0026	0.374064	15.753	0.645208	0.0529	0.0056	0.360838	0.544842	0.046	0.0641543	0.0026	0.432746	0.01862	0.0027	0.0529	0.0056	372.8	5.7	54	313	70	240	396.8	3.7	16	380	9.8	31	4.42105	396.8	16	0.453	0.046	0.06348	0.0026	0.374064	Zircon	294	14	5.47	0.78	709.9	9.8	479100
BAL-01-02-11-r	Output_1_182	32.036	0.448	0.047	0.06196	0.0026	0.371377	16.1394	0.677252	0.053	0.0059	0.352724	0.499103	0.047	0.0623427	0.0026	0.404939	0.01854	0.0027	0.053	0.0059	371.3	7.1	54	325	99	240	387.5	5	16	374	14	33	3.60963	387.5	16	0.448	0.047	0.06196	0.0026	0.371377	Zircon	151.5	6.1	3.83	0.62	776	27	481000
BAL-01-02-12-c	Output_1_183	26.571	0.532	0.055	0.0638	0.0029	0.402485	15.674	0.712454	0.0613	0.0067	0.383993	0.456465	0.055	0.0631217	0.0029	0.356277	0.02095	0.0031	0.0613	0.0067	419	11	61	627	85	240	398.4	8	17	433	13	36	7.99076	394.583	17	0.456465	0.055	0.0631217	0.0029	0.356277	Zircon	207	14	5.1	1	1013	73	454100
BAL-01-02-14-c	Output_1_187	28.267	0.488	0.052	0.06286	0.0027	0.373863	15.9084	0.683306	0.0574	0.0063	0.364433	0.457768	0.052	0.0625352	0.0027	0.355287	0.02045	0.003	0.0574	0.0063	409.2	8.8	60	492	86	230	392.9	4.9	16	404	15	35	2.74752	391.025	16	0.457768	0.052	0.0625352	0.0027	0.355287	Zircon	162.4	6.7	3.5	0.68	626	16	485200
BAL-01-02-15-c	Output_1_189	25.817	0.479	0.052	0.0638	0.0028	0.374799	15.674	0.687886	0.0548	0.0063	0.356645	0.480222	0.052	0.0637867	0.0028	0.375688	0.01996	0.003	0.0548	0.0063	399	14	59	390	110	230	398.8	6.3	17	400	17	37	0.3	398.613	17	0.480222	0.052	0.0637867	0.0028	0.375688	Zircon	138	6.2	4.09	0.87	425	8.3	473900
BAL-01-02-16-r	Output_1_191	14.699	0.541	0.057	0.06244	0.0027	0.379682	16.0154	0.692529	0.0644	0.0071	0.365138	0.523328	0.057	0.0621863	0.0027	0.370292	0.02015	0.003	0.0644	0.0071	405	12	61	750	100	250	390.4	5.8	16	438	16	38	10.8676	388.908	16	0.523328	0.057	0.0621863	0.0027	0.370292	Zircon	172.2	8.4	5.7	1.1	558	14	502400
BAL-01-02-16-rx	Output_1_192	29.398	0.438	0.045	0.06218	0.0026	0.376966	16.0823	0.672468	0.0524	0.0057	0.358801	0.492597	0.045	0.0625382	0.0026	0.414221	0.01865	0.0027	0.0524	0.0057	373.4	7.3	54	304	81	220	388.8	4.6	16	368	12	32	5.65217	391.043	16	0.492597	0.045	0.0625382	0.0026	0.414221	Zircon	140.4	5.6	4.36	0.73	756	11	472700
BAL-01-04-01-c	Output_1_193	27.89	0.434	0.045	0.06226	0.0026	0.373593	16.0617	0.670741	0.0517	0.0056	0.359728	0.487229	0.045	0.0626187	0.0026	0.410033	0.01869	0.0027	0.0517	0.0056	374.2	6.9	54	255	84	230	389.3	4.8	16	368	12	31	5.78804	391.531	16	0.487229	0.045	0.0626187	0.0026	0.410033	Zircon	184.2	8	3.75	0.76	833	34	488200
BAL-01-04-02-r	Output_1_196	28.079	0.436	0.045	0.06214	0.0026	0.375695	16.0927	0.673334	0.0524	0.0056	0.364567	0.443795	0.045	0.0620992	0.0026	0.381656	0.01955	0.0029	0.0524	0.0056	391.3	9.3	57	284	77	230	388.6	4.6	16	368	11	31	5.59783	388.379	16	0.443795	0.045	0.0620992	0.0026	0.381656	Zircon	398	22	3.97	0.71	704	21	485400
BAL-01-04-02-r2	Output_1_197	31.094	0.42	0.044	0.06117	0.0026	0.375959	16.3479	0.694859	0.0511	0.0057	0.356074	0.435283	0.044	0.061207	0.0026	0.387416	0.01899	0.0028	0.0511	0.0057	380	10	56	239	93	230	382.7	4	16	355	13	32	7.80282	382.962	16	0.435283	0.044	0.061207	0.0026	0.387416	Zircon	149	6.9	3.16	0.59	398	9	476300
BAL-01-04-03-r	Output_1_198	28.267	0.454	0.047	0.06355	0.0027	0.379669	15.7356	0.668548	0.0531	0.0058	0.362511	0.476514	0.047	0.0636441	0.0027	0.395116	0.01951	0.0029	0.0531	0.0058	390.5	8.2	57	344	88	250	397.1	4.9	16	380	13	34	4.5	397.749	16	0.476514	0.047	0.0636441	0.0027	0.395116	Zircon	161	5.3	4.16	0.75	560	11	482000
BAL-01-04-04-c	Output_1_199	30.906	0.43	0.046	0.0618	0.0026	0.365989	16.1812	0.680764	0.0508	0.0057	0.351083	0.437127	0.046	0.0618366	0.0026	0.371035	0.01919	0.0028	0.0508	0.0057	384	10	56	222	97	230	386.5	4.8	16	363	14	32	6.47383	386.785	16	0.437127	0.046	0.0618366	0.0026	0.371035	Zircon	159	14	2.88	0.58	438	59	479000
BAL-01-04-05-c	Output_1_200	22.614	0.458	0.045	0.06428	0.0027	0.39309	15.5569	0.65345	0.0523	0.0055	0.370924	0.477332	0.045	0.0643951	0.0027	0.406374	0.01985	0.0029	0.0523	0.0055	397.3	6.6	58	300	60	220	401.6	3.7	16	382.2	8.1	32	5.07588	402.299	16	0.477332	0.045	0.0643951	0.0027	0.406374	Inclusion
BAL-01-04-04-r	Output_1_201	10.742	0.434	0.058	0.0625	0.003	0.33803	16	0.768	0.0511	0.0071	0.326529	0.43323	0.058	0.062443	0.003	0.337771	0.0197	0.003	0.0511	0.0071	395	20	60	250	190	280	390.6	9.6	18	363	28	40	7.60331	390.466	18	0.43323	0.058	0.062443	0.003	0.337771	Inclusion
BAL-01-04-05-r	Output_1_202	27.137	0.437	0.044	0.06317	0.0026	0.378387	15.8303	0.651556	0.0512	0.0054	0.363544	0.456828	0.044	0.0632611	0.0026	0.392475	0.01948	0.0029	0.0512	0.0054	390	6.8	57	239	68	230	394.8	4.3	16	367.8	9.4	31	7.34095	395.428	16	0.456828	0.044	0.0632611	0.0026	0.392475	Zircon	244.6	8.6	5.1	0.86	1076	16	477100
BAL-01-04-06r	Output_1_203	22.802	0.448	0.048	0.06268	0.0026	0.361039	15.9541	0.661783	0.0528	0.0059	0.348011	0.488003	0.048	0.0629422	0.0026	0.387205	0.01903	0.0028	0.0528	0.0059	381	6.4	55	310	100	240	391.9	3.8	16	375	15	33	4.50667	393.494	16	0.488003	0.048	0.0629422	0.0026	0.387205	Zircon	152.1	6.6	4.84	0.83	893	24	489800
BAL-01-04-06r2	Output_1_204	6.2188	0.422	0.054	0.0612	0.0028	0.336668	16.3399	0.747576	0.0528	0.0075	0.306581	0.471481	0.054	0.0614151	0.0028	0.36984	0.0184	0.0029	0.0528	0.0075	369	21	57	290	210	300	383.1	8.4	17	356	26	39	7.61236	384.226	17	0.471481	0.054	0.0614151	0.0028	0.36984	Zircon	145	11	4.59	0.9	592	20	503000
BAL-02-03-01-r	Output_1_1	25.54	0.521	0.042	0.06289	0.0018	0.33458	15.9008	0.455103	0.0585	0.0063	0.256854	0.503853	0.042	0.0628638	0.0018	0.324868	0.01971	0.0025	0.0585	0.0063	394	11	50	530	120	220	393.2	5	11	426	19	27	7.69953	393.018	11	0.503853	0.042	0.0628638	0.0018	0.324868	Zircon	103.4	5.8	3.09	0.59	427	38	465200
BAL-02-03-02-c	Output_1_3	10.266	0.508	0.044	0.06216	0.0018	0.317077	16.0875	0.465855	0.0582	0.0064	0.254651	0.529701	0.044	0.0624159	0.0018	0.327977	0.01902	0.0024	0.0582	0.0064	380.9	6.7	48	510	140	250	388.8	4.9	11	416	22	30	6.53846	388.8	11	0.508	0.044	0.06216	0.0018	0.317077	Zircon	308	11	6.6	1.2	2310	82	476000
BAL-02-03-03-c	Output_1_4	28.022	0.505	0.034	0.06428	0.0019	0.401991	15.5569	0.459835	0.0561	0.0054	0.293548	0.520166	0.034	0.0644704	0.0019	0.411028	0.01976	0.0025	0.0561	0.0054	395.5	6.6	49	464	69	200	401.5	5.6	12	415	12	23	3.25301	401.5	12	0.505	0.034	0.06428	0.0019	0.401991	Zircon	231	11	5.42	0.79	1157	73	459100
BAL-02-03-04-c	Output_1_5	31.013	0.495	0.033	0.0648	0.002	0.420124	15.4321	0.476299	0.0544	0.0053	0.302003	0.494758	0.033	0.0648734	0.002	0.419563	0.02006	0.0026	0.0544	0.0053	401	13	51	384	75	220	404.8	6.1	12	407	11	23	0.540541	404.8	12	0.495	0.033	0.0648	0.002	0.420124	Zircon	221.7	7.2	5	0.76	704	23	465900
BAL-02-03-05-c	Output_1_6	28.652	0.48	0.032	0.06404	0.0018	0.388494	15.6152	0.438904	0.0541	0.0053	0.275782	0.491023	0.032	0.0641513	0.0018	0.39545	0.01962	0.0025	0.0541	0.0053	392.7	9.3	50	385	79	210	400.1	4.8	11	397	11	22	0.780856	400.1	11	0.48	0.032	0.06404	0.0018	0.388494	Zircon	187.9	6	3.54	0.65	607	12	471500
BAL-02-03-06-c	Output_1_7	8.6584	0.563	0.05	0.0667	0.0021	0.334137	14.9925	0.472028	0.0598	0.0066	0.274323	0.475757	0.05	0.0660931	0.0021	0.289392	0.02237	0.0029	0.0598	0.0066	447	17	58	570	140	250	416.5	6.8	12	452	25	33	7.85398	412.575	12	0.475757	0.05	0.0660931	0.0021	0.289392	Zircon	285	15	4.8	1	608	44	424200
BAL-02-03-07-r	Output_1_8	27.55	0.458	0.03	0.06227	0.0017	0.38471	16.0591	0.438421	0.053	0.0051	0.272939	0.498341	0.03	0.0626277	0.0017	0.411053	0.01855	0.0023	0.053	0.0051	371.4	5.9	46	312	65	210	389.4	4.1	11	385	9	21	1.14286	389.4	11	0.458	0.03	0.06227	0.0017	0.38471	Zircon	254.3	7.4	5.89	0.71	1003	17	460500
BAL-02-03-08-c	Output_1_9	27.864	0.476	0.033	0.06239	0.0017	0.365793	16.0282	0.436736	0.0541	0.0053	0.267963	0.496886	0.033	0.0626507	0.0017	0.378219	0.01889	0.0024	0.0541	0.0053	378.2	6.2	47	351	79	210	390.1	3.9	10	394	12	22	0.989848	390.1	10	0.476	0.033	0.06239	0.0017	0.365793	Zircon	198.7	5.5	4.43	0.76	804	11	460300
BAL-02-03-09-c	Output_1_10	28.652	0.488	0.032	0.06637	0.0018	0.382192	15.0671	0.408629	0.053	0.0051	0.271274	0.47623	0.032	0.0662997	0.0018	0.37462	0.02091	0.0026	0.053	0.0051	418.3	7.7	52	329	76	220	414.2	3.9	11	403	10	23	2.77916	414.2	11	0.488	0.032	0.06637	0.0018	0.382192	Zircon	290.2	7.6	4.11	0.71	691	24	462600
BAL-02-03-11-r	Output_1_12	26.29	0.516	0.034	0.06228	0.0017	0.382719	16.0565	0.43828	0.0591	0.0057	0.272321	0.557205	0.034	0.0626906	0.0017	0.406111	0.01884	0.0024	0.0591	0.0057	377.2	7.4	47	558	66	210	389.5	4	11	423	10	23	7.91962	389.5	11	0.516	0.034	0.06228	0.0017	0.382719	Zircon	217.8	9.9	5.52	0.83	1193	80	467000
BAL-02-03-13-r	Output_1_14	27.606	0.468	0.03	0.06333	0.0018	0.405335	15.7903	0.448801	0.0536	0.0051	0.286219	0.516941	0.03	0.0637337	0.0018	0.43759	0.01899	0.0024	0.0536	0.0051	380.3	5.9	47	354	69	210	395.8	4	11	389	9.1	21	1.74807	395.8	11	0.468	0.03	0.06333	0.0018	0.405335	Zircon	179	5.6	4.27	0.96	1060	14	467800
BAL-02-03-14-c	Output_1_15	25.673	0.481	0.031	0.06513	0.0018	0.394112	15.3539	0.424337	0.0539	0.0052	0.275391	0.491558	0.031	0.0651936	0.0018	0.401053	0.02014	0.0025	0.0539	0.0052	402.9	6.7	50	349	65	210	406.7	3.9	11	399.9	9.5	22	1.70043	407.134	11	0.491558	0.031	0.0651936	0.0018	0.401053	Zircon	213.7	6.7	4.63	0.8	830	15	466600
BAL-02-03-15-r	Output_1_16	20.704	0.524	0.036	0.06648	0.0019	0.384089	15.0421	0.429904	0.057	0.0056	0.279325	0.497099	0.036	0.0662736	0.0019	0.368078	0.0212	0.0027	0.057	0.0056	424.1	7.9	53	470	82	220	414.9	4.7	11	427	12	24	2.83372	413.666	11	0.497099	0.036	0.0662736	0.0019	0.368078	Zircon	579	78	4.04	0.83	823	21	453400
BAL-02-03-17-c	Output_1_19	27.794	0.484	0.034	0.06419	0.0019	0.388297	15.5787	0.461125	0.0549	0.0053	0.293138	0.464187	0.034	0.0640134	0.0019	0.375562	0.02047	0.0026	0.0549	0.0053	409.5	9.1	52	386	73	210	401	5.3	12	399	12	23	0.501253	401	12	0.484	0.034	0.06419	0.0019	0.388297	Zircon	200	12	3.43	0.75	711	21	466700
BAL-02-03-19-c	Output_1_22	28.158	0.466	0.031	0.0642	0.0018	0.38838	15.5763	0.436719	0.0531	0.0051	0.280223	0.526347	0.031	0.0646644	0.0018	0.427305	0.0191	0.0024	0.0531	0.0051	382.5	6.3	48	325	72	220	401.1	4.8	11	389.5	9.5	21	2.97818	401.1	11	0.466	0.031	0.0642	0.0018	0.38838	Zircon	203.9	8.2	3.89	0.78	908	38	466500
BAL-02-03-19-r	Output_1_23	25.397	0.511	0.037	0.06366	0.0019	0.381092	15.7084	0.468835	0.0581	0.0059	0.281981	0.438372	0.037	0.0630735	0.0019	0.336134	0.0214	0.0027	0.0581	0.0059	428	10	54	510	100	230	397.8	5.3	11	420	15	25	5.28571	397.8	11	0.511	0.037	0.06366	0.0019	0.381092	Zircon	140.7	5.7	4	0.76	629	28	467200
BAL-02-03-20-c	Output_1_24	11.87	0.517	0.042	0.0632	0.002	0.362975	15.8228	0.500721	0.0593	0.0064	0.28137	0.497984	0.042	0.0630477	0.002	0.352042	0.02005	0.0026	0.0593	0.0064	401	10	51	570	130	230	395	7.1	12	422	20	28	6.3981	394.134	12	0.497984	0.042	0.0630477	0.002	0.352042	Zircon	236	10	4.4	1.5	900	46	460000
BAL-02-03-21-c	Output_1_25	27.054	0.475	0.031	0.06225	0.0017	0.386015	16.0643	0.438703	0.0555	0.0054	0.270235	0.479052	0.031	0.0622739	0.0017	0.388685	0.0194	0.0025	0.0555	0.0054	388.3	7	49	417	75	220	389.3	3.3	10	394	10	22	1.19289	389.3	10	0.475	0.031	0.06225	0.0017	0.386015	Zircon	312	35	3.43	0.72	846	41	470400
BAL-02-03-21-r	Output_1_26	24.017	0.511	0.035	0.0661	0.0019	0.386972	15.1286	0.434861	0.0566	0.0056	0.278988	0.413874	0.035	0.0652648	0.0019	0.325503	0.02248	0.0028	0.0566	0.0056	449.4	8.9	56	447	84	220	412.6	5.1	12	422	13	25	2.22749	412.6	12	0.511	0.035	0.0661	0.0019	0.386972	Zircon	303	21	4.31	0.73	903	35	448400
BAL-02-03-23-c	Output_1_28	29.262	0.508	0.033	0.06129	0.0017	0.392684	16.3159	0.452553	0.06	0.0058	0.275805	0.469456	0.033	0.0609827	0.0017	0.368643	0.01986	0.0025	0.06	0.0058	397.5	8.3	50	622	69	210	383.4	4.2	10	416	11	23	7.83654	381.599	10	0.469456	0.033	0.0609827	0.0017	0.368643	Zircon	290	36	4.29	0.85	725	52	484600
BAL-02-03-23-r	Output_1_29	28.71	0.517	0.034	0.06243	0.0017	0.382565	16.0179	0.436177	0.0598	0.0058	0.270305	0.465027	0.034	0.062023	0.0017	0.351027	0.02059	0.0026	0.0598	0.0058	411.8	8.3	52	591	67	210	390.4	3.6	10	422	10	23	7.48815	387.917	10	0.465027	0.034	0.062023	0.0017	0.351027	Zircon	199.1	8	4.7	0.65	656	22	483900
BAL-02-03-24-c	Output_1_30	28.986	0.492	0.032	0.06208	0.0017	0.388039	16.1083	0.441109	0.0579	0.0055	0.276999	0.527185	0.032	0.0623416	0.0017	0.409792	0.019	0.0024	0.0579	0.0055	380.5	5.7	47	526	67	210	388.3	2.6	10	405.2	9.9	22	4.17078	388.3	10	0.492	0.032	0.06208	0.0017	0.388039	Zircon	319	17	6.12	0.84	1850	100	469300
BAL-02-03-25-c	Output_1_31	29.814	0.471	0.03	0.06244	0.0017	0.393048	16.0154	0.436037	0.055	0.0052	0.276724	0.493641	0.03	0.0626073	0.0017	0.407934	0.01911	0.0024	0.055	0.0052	382.5	6.1	48	422	68	230	390.5	3.4	10	393.9	9.2	22	0.863163	390.5	10	0.471	0.03	0.06244	0.0017	0.393048	Zircon	206.7	6.7	5.94	0.81	779	11	470200
BAL-02-03-25-r	Output_1_32	29.538	0.554	0.037	0.06402	0.0018	0.388003	15.6201	0.439179	0.0627	0.0061	0.277636	0.479368	0.037	0.0634132	0.0018	0.345156	0.02159	0.0027	0.0627	0.0061	431.7	7.9	54	681	72	210	400	4.4	11	447	12	24	10.5145	396.35	11	0.479368	0.037	0.0634132	0.0018	0.345156	Zircon	232.3	6.7	3.48	0.65	692	17	471300
BAL-02-03-27-c	Output_1_35	29.538	0.536	0.037	0.06493	0.0018	0.372668	15.4012	0.426955	0.0604	0.0059	0.273018	0.355774	0.037	0.0634128	0.0018	0.263309	0.02289	0.0029	0.0604	0.0059	457	11	58	641	77	220	405.5	4.3	11	436	13	24	6.99541	405.5	11	0.536	0.037	0.06493	0.0018	0.372668	Zircon	304	25	5.21	0.79	2020	240	465600
BAL-02-03-28-r	Output_1_36	28.71	0.499	0.032	0.06342	0.0017	0.385661	15.7679	0.422665	0.0577	0.0056	0.266224	0.484298	0.032	0.0632554	0.0017	0.376764	0.02013	0.0025	0.0577	0.0056	402.8	6.5	50	519	70	210	396.4	3.3	10	410	9.7	22	3.31707	395.393	10	0.484298	0.032	0.0632554	0.0017	0.376764	Zircon	231.9	6.9	8.4	1	933	15	465500
BAL-02-03-29-c	Output_1_37	29.262	0.502	0.032	0.06365	0.0018	0.405522	15.7109	0.444299	0.0581	0.0055	0.286237	0.608171	0.032	0.0644596	0.0018	0.468786	0.01883	0.0024	0.0581	0.0055	377.1	5	47	532	62	210	397.8	3.7	11	413.4	8.4	21	3.77358	397.8	11	0.502	0.032	0.06365	0.0018	0.405522	Zircon	275	13	4.72	0.64	1527	67	459500
BAL-02-03-32-c	Output_1_41	21.256	0.511	0.033	0.06427	0.0018	0.397877	15.5594	0.435769	0.0583	0.0056	0.279916	0.51841	0.033	0.0642865	0.0018	0.402629	0.02004	0.0025	0.0583	0.0056	401	5.8	50	526	62	210	401.5	4.1	11	418.4	9.6	22	4.0392	401.5	11	0.511	0.033	0.06427	0.0018	0.397877	Zircon	240.2	6.2	6	1.1	1483	32	471300
BAL-02-03-33-c	Output_1_43	25.121	0.498	0.032	0.06195	0.0017	0.392743	16.1421	0.442962	0.0591	0.0057	0.273663	0.463915	0.032	0.0616155	0.0017	0.371381	0.01989	0.0025	0.0591	0.0057	398	6.7	50	551	67	210	387.5	3.8	11	409.8	9.2	22	5.44168	385.443	11	0.463915	0.032	0.0616155	0.0017	0.371381	Zircon	296	17	4.82	0.89	1302	32	474100
BAL-02-05-01-r	Output_1_51	29.538	0.461	0.03	0.06322	0.0017	0.381894	15.8178	0.425344	0.0536	0.0051	0.271959	0.472353	0.03	0.0632639	0.0017	0.389655	0.01962	0.0025	0.0536	0.0051	392.8	7.2	49	345	55	200	395.2	3.7	11	384	9.6	21	2.91667	395.445	11	0.472353	0.03	0.0632639	0.0017	0.389655	Zircon	239	18	4.37	0.75	682	12	479400
BAL-02-05-02-c	Output_1_52	29.262	0.477	0.034	0.06463	0.0018	0.363936	15.4727	0.430928	0.0548	0.0054	0.27198	0.492159	0.034	0.0646632	0.0018	0.373741	0.02007	0.0026	0.0548	0.0054	401.6	9.9	51	400	81	210	403.7	4.9	11	395	13	23	2.20253	403.923	11	0.492159	0.034	0.0646632	0.0018	0.373741	Zircon	185.8	8.1	5.42	0.95	578	16	477800
BAL-02-05-02-r	Output_1_53	27.882	0.503	0.034	0.06285	0.0017	0.371518	15.9109	0.430366	0.0588	0.0057	0.268761	0.489711	0.034	0.0626888	0.0017	0.363821	0.02018	0.0026	0.0588	0.0057	403.7	7.5	51	544	76	220	392.9	3.7	11	413	12	23	4.86683	391.957	11	0.489711	0.034	0.0626888	0.0017	0.363821	Zircon	175.5	5.2	4.35	0.72	654.2	6.3	480300
BAL-02-05-03-r	Output_1_54	29.262	0.472	0.031	0.06285	0.0017	0.380806	15.9109	0.430366	0.055	0.0053	0.270248	0.489387	0.031	0.0629568	0.0017	0.392139	0.01942	0.0025	0.055	0.0053	388.7	7.3	49	409	72	220	392.9	3.8	11	391.5	9.5	21	0.357599	392.9	11	0.472	0.031	0.06285	0.0017	0.380806	Zircon	201.2	7.6	4.08	0.71	1215	30	476900
BAL-02-05-04-c	Output_1_55	15.735	0.489	0.039	0.0648	0.0022	0.391677	15.4321	0.523929	0.0541	0.0058	0.301901	0.488055	0.039	0.0648403	0.0022	0.39083	0.02009	0.0026	0.0541	0.0058	402	11	51	390	130	250	404.6	8.6	13	403	18	27	0.397022	404.995	13	0.488055	0.039	0.0648403	0.0022	0.39083	Zircon	140.2	7.1	4.5	1	300.3	6.4	456900
BAL-02-05-05-c	Output_1_56	31.747	0.458	0.03	0.06302	0.0018	0.399705	15.868	0.453227	0.0538	0.0052	0.283396	0.484076	0.03	0.0631582	0.0018	0.417808	0.01939	0.0024	0.0538	0.0052	388.2	6	48	346	71	210	393.9	4.1	11	382.1	9.4	21	3.0882	394.803	11	0.484076	0.03	0.0631582	0.0018	0.417808	Zircon	156	5.1	3.57	0.67	901	27	471000
BAL-02-05-05-r	Output_1_57	28.71	0.487	0.033	0.06286	0.0018	0.389255	15.9084	0.455537	0.0576	0.0057	0.277962	0.497443	0.033	0.0628472	0.0018	0.396371	0.01968	0.0025	0.0576	0.0057	393.9	9.4	50	481	84	220	393	4.6	11	402	12	23	2.23881	393	11	0.487	0.033	0.06286	0.0018	0.389255	Zircon	160.2	5	3.83	0.71	536.4	6.3	470500
BAL-02-05-06-c	Output_1_58	27.606	0.461	0.031	0.06394	0.0018	0.386165	15.6397	0.440278	0.0532	0.0052	0.27676	0.461503	0.031	0.06388	0.0018	0.386831	0.0202	0.0026	0.0532	0.0052	404.3	8.7	51	327	79	210	399.5	4.8	11	384	11	22	4.03646	399.179	11	0.461503	0.031	0.06388	0.0018	0.386831	Zircon	345	14	2.35	0.58	686	25	472000
BAL-02-05-07-c	Output_1_60	28.434	0.456	0.034	0.0629	0.0018	0.358318	15.8983	0.454958	0.0537	0.0055	0.269098	0.460407	0.034	0.062858	0.0018	0.36154	0.01981	0.0025	0.0537	0.0055	397	10	50	320	97	210	393.2	5.2	11	379	14	23	3.7467	392.983	11	0.460407	0.034	0.062858	0.0018	0.36154	Zircon	224.7	7.5	2.79	0.56	433	10	482000
BAL-02-05-07-r	Output_1_61	29.611	0.498	0.035	0.06328	0.0018	0.375169	15.8028	0.44951	0.0589	0.0059	0.273168	0.460811	0.035	0.0628455	0.0018	0.352843	0.02101	0.0027	0.0589	0.0059	420.1	9.2	53	535	90	220	395.5	4.4	11	411	13	23	3.77129	392.907	11	0.460811	0.035	0.0628455	0.0018	0.352843	Zircon	189.4	6.6	4.08	0.65	582	11	465600
BAL-02-05-09-c	Output_1_63	24.338	0.476	0.037	0.06277	0.0018	0.346113	15.9312	0.456844	0.056	0.0058	0.266834	0.508081	0.037	0.0629643	0.0018	0.365415	0.01911	0.0024	0.056	0.0058	382.6	8.7	48	450	100	220	392.4	5.1	11	393	17	25	0.152672	392.4	11	0.476	0.037	0.06277	0.0018	0.346113	Zircon	230.4	7.9	5.5	1.1	706	20	479200
BAL-02-05-09-r	Output_1_64	29.611	0.533	0.037	0.06274	0.0018	0.381954	15.9388	0.457281	0.0633	0.0063	0.276986	0.465917	0.037	0.0620706	0.0018	0.343014	0.02169	0.0027	0.0633	0.0063	433.6	8.8	54	696	91	220	392.2	4.4	11	434	13	24	9.63134	388.206	11	0.465917	0.037	0.0620706	0.0018	0.343014	Zircon	231	6.6	4.37	0.71	725	35	475300
BAL-02-05-10-r	Output_1_65	27.38	0.475	0.034	0.06237	0.0017	0.355864	16.0333	0.437016	0.0564	0.0057	0.260394	0.495597	0.034	0.0624588	0.0017	0.368776	0.01923	0.0024	0.0564	0.0057	385	6.9	48	457	95	220	390	3.9	10	393	14	24	0.763359	390	10	0.475	0.034	0.06237	0.0017	0.355864	Zircon	168.6	5.5	3.7	0.77	414.1	3.7	478600
BAL-02-05-11-c	Output_1_66	29.611	0.486	0.033	0.06506	0.0019	0.395099	15.3704	0.448875	0.0559	0.0054	0.289379	0.502545	0.033	0.0650709	0.0019	0.406303	0.02028	0.0026	0.0559	0.0054	406	12	52	437	65	200	406.3	5.6	12	401	11	22	1.3217	406.3	12	0.486	0.033	0.06506	0.0019	0.395099	Zircon	204.7	7.5	4.85	0.86	758	50	474100
BAL-02-05-11-r	Output_1_67	30.017	0.459	0.03	0.0629	0.0017	0.382131	15.8983	0.429683	0.054	0.0051	0.275125	0.529055	0.03	0.063401	0.0017	0.427478	0.01868	0.0023	0.054	0.0051	374	5.1	47	367	62	210	393.2	2.9	10	383.1	8.6	21	2.63639	393.2	10	0.459	0.03	0.0629	0.0017	0.382131	Zircon	208.3	5.7	3.67	0.63	1189	24	477100
BAL-02-05-12-r	Output_1_68	28.192	0.466	0.034	0.06355	0.0018	0.361894	15.7356	0.445699	0.055	0.0055	0.272521	0.488093	0.034	0.0636025	0.0018	0.376399	0.01968	0.0025	0.055	0.0055	393.8	8.2	49	396	88	220	397.1	4.5	11	388	14	23	2.34536	397.497	11	0.488093	0.034	0.0636025	0.0018	0.376399	Zircon	310	19	3.67	0.63	576	18	487300
BAL-02-05-13-r	Output_1_69	30.017	0.466	0.031	0.06399	0.0017	0.370876	15.6274	0.415169	0.0545	0.0053	0.263529	0.485926	0.031	0.0640335	0.0017	0.384209	0.01989	0.0025	0.0545	0.0053	398.1	5.5	50	370	71	210	399.8	3.1	10	389	10	22	2.77635	400.109	10	0.485926	0.031	0.0640335	0.0017	0.384209	Zircon	186.3	6.3	3.73	0.65	1055	26	471700
BAL-02-05-14-c	Output_1_70	22.513	0.487	0.032	0.06351	0.0018	0.396058	15.7455	0.44626	0.0571	0.0055	0.282276	0.499861	0.032	0.0635106	0.0018	0.404818	0.01983	0.0025	0.0571	0.0055	396.9	7.1	50	485	73	220	397.5	3.9	11	402	10	22	1.1194	397.5	11	0.487	0.032	0.06351	0.0018	0.396058	Zircon	192	7.1	5.31	0.95	748	13	490100
BAL-02-05-14-r	Output_1_71	29.611	0.466	0.03	0.0635	0.0017	0.383975	15.748	0.421601	0.0554	0.0053	0.269487	0.505388	0.03	0.063669	0.0017	0.410217	0.01925	0.0024	0.0554	0.0053	385.5	8.2	48	409	64	210	396.8	3.5	11	387.9	9.2	21	2.29441	396.8	11	0.466	0.03	0.0635	0.0017	0.383975	Zircon	178.8	6.2	4.54	0.7	605	5	479000
BAL-02-05-15-c	Output_1_72	8.5183	0.499	0.043	0.0655	0.0022	0.363163	15.2672	0.512791	0.0562	0.0063	0.287018	0.506531	0.043	0.0654935	0.0022	0.367938	0.02046	0.0027	0.0562	0.0063	409	16	53	430	150	250	409.2	8.7	13	410	22	30	0.195122	409.2	13	0.499	0.043	0.0655	0.0022	0.363163	Zircon	371	48	5	1.3	641	34	451700
BAL-02-05-15-r	Output_1_73	27.786	0.515	0.033	0.06509	0.0019	0.414558	15.3633	0.448461	0.0591	0.0057	0.289681	0.491573	0.033	0.0647731	0.0019	0.400397	0.02122	0.0027	0.0591	0.0057	424	10	54	560	65	210	407.2	5.3	12	421	9.7	22	3.27791	404.588	12	0.491573	0.033	0.0647731	0.0019	0.400397	Zircon	163.8	6.3	3.99	0.75	404	18	470800
BAL-02-05-16-c	Output_1_74	18.862	0.463	0.032	0.06395	0.0018	0.377173	15.6372	0.440141	0.0543	0.0054	0.272336	0.518041	0.032	0.0642743	0.0018	0.412912	0.01909	0.0024	0.0543	0.0054	382.2	8.2	48	360	91	220	399.6	4.6	11	386	12	22	3.52332	399.6	11	0.463	0.032	0.06395	0.0018	0.377173	Zircon	232	8.3	3.62	0.78	907	30	461000
BAL-02-05-16-r	Output_1_75	27.989	0.485	0.033	0.06374	0.0017	0.364945	15.6887	0.418432	0.0565	0.0055	0.264244	0.520476	0.033	0.0639385	0.0017	0.38672	0.01931	0.0024	0.0565	0.0055	386.5	6.6	48	458	80	220	398.3	3.4	11	401	11	22	0.673317	398.3	11	0.485	0.033	0.06374	0.0017	0.364945	Zircon	177.2	7	4.44	0.68	644	19	473800
BAL-02-05-17-c	Output_1_76	31.437	0.496	0.031	0.06484	0.0018	0.405929	15.4226	0.428141	0.0564	0.0054	0.278475	0.539506	0.031	0.0651317	0.0018	0.433439	0.01965	0.0025	0.0564	0.0054	393.4	5.3	49	462	62	220	405	4.7	11	409.5	8.3	22	1.0989	405	11	0.496	0.031	0.06484	0.0018	0.405929	Zircon	179	5.5	3.72	0.7	971	25	470100
BAL-02-05-18-r	Output_1_77	27.38	0.537	0.036	0.06483	0.0018	0.382641	15.425	0.428273	0.061	0.006	0.271661	0.490657	0.036	0.0643835	0.0018	0.356069	0.02131	0.0027	0.061	0.006	426.2	8.8	53	621	79	210	404.9	4.2	11	437	12	23	7.34554	402.229	11	0.490657	0.036	0.0643835	0.0018	0.356069	Zircon	270	29	4.06	0.71	626	20	480300
BAL-02-05-19-c	Output_1_78	28.192	0.482	0.031	0.06407	0.0019	0.418721	15.6079	0.462854	0.0554	0.0053	0.296081	0.496547	0.031	0.0641305	0.0019	0.428729	0.01986	0.0025	0.0554	0.0053	397.4	7.5	50	410	60	210	400.3	5.1	11	399.7	9.5	22	0.150113	400.3	11	0.482	0.031	0.06407	0.0019	0.418721	Zircon	282	16	3.3	0.67	1076	72	479800
BAL-02-05-19-r	Output_1_79	29.206	0.47	0.03	0.06295	0.0017	0.389648	15.8856	0.429	0.055	0.0052	0.274651	0.521589	0.03	0.0633152	0.0017	0.422998	0.01887	0.0024	0.055	0.0052	377.8	5.1	47	401	61	220	393.5	3.8	11	390.3	8.3	21	0.819882	393.5	11	0.47	0.03	0.06295	0.0017	0.389648	Zircon	205.7	6.7	4.85	0.73	614	7.5	471400
BAL-02-05-20-c	Output_1_80	29.409	0.455	0.031	0.0611	0.0017	0.378064	16.3666	0.455372	0.0545	0.0053	0.27507	0.488143	0.031	0.0613404	0.0017	0.399975	0.01859	0.0023	0.0545	0.0053	372.3	6.7	47	386	73	210	382.3	4.6	11	380	11	21	0.605263	382.3	11	0.455	0.031	0.0611	0.0017	0.378064	Zircon	184.1	6.4	3.67	0.58	1005	41	479800
BAL-02-05-21-c	Output_1_81	28.8	0.51	0.035	0.06415	0.0018	0.378452	15.5885	0.4374	0.0595	0.0058	0.276617	0.499665	0.035	0.0639333	0.0018	0.372939	0.02081	0.0027	0.0595	0.0058	416	11	53	563	81	220	400.8	4.9	11	417	13	24	3.88489	399.502	11	0.499665	0.035	0.0639333	0.0018	0.372939	Zircon	166.2	4.6	3.01	0.64	464.7	7.7	470000
BAL-02-05-22-c	Output_1_82	30.22	0.499	0.032	0.06505	0.0018	0.396186	15.3728	0.425381	0.057	0.0054	0.280368	0.555256	0.032	0.0654134	0.0018	0.430877	0.01974	0.0025	0.057	0.0054	395.1	7.6	49	482	56	210	406.2	3.4	11	410.5	8.8	22	1.0475	406.2	11	0.499	0.032	0.06505	0.0018	0.396186	Inclusion
BAL-02-05-23-c	Output_1_84	30.017	0.487	0.033	0.06442	0.0018	0.381213	15.5231	0.433742	0.0557	0.0054	0.27694	0.497652	0.033	0.0644457	0.0018	0.388173	0.02003	0.0026	0.0557	0.0054	400.9	9.7	51	423	74	220	403	4.4	11	402	12	22	0.248756	403	11	0.487	0.033	0.06442	0.0018	0.381213	Zircon	160.8	5.8	4.5	0.9	429	18	477900
BAL-02-05-23-r	Output_1_85	30.625	0.501	0.035	0.06446	0.0018	0.371164	15.5135	0.433203	0.0575	0.0057	0.27114	0.524534	0.035	0.0645727	0.0018	0.385477	0.01978	0.0025	0.0575	0.0057	395.8	8.8	50	503	86	220	402.7	3.5	11	411	13	24	2.01946	402.7	11	0.501	0.035	0.06446	0.0018	0.371164	Zircon	236.3	7.1	3.47	0.56	564.1	6.6	486700
BAL-02-05-25-c	Output_1_87	29.611	0.477	0.034	0.06373	0.0018	0.368382	15.6912	0.443185	0.0555	0.0055	0.274094	0.513469	0.034	0.0639437	0.0018	0.391233	0.01911	0.0024	0.0555	0.0055	382	11	49	414	81	210	398.2	3.9	11	394	13	23	1.06599	398.2	11	0.477	0.034	0.06373	0.0018	0.368382	Zircon	237.2	7.8	2.68	0.53	470	12	478100
BAL-02-05-26-c	Output_1_88	29.409	0.466	0.031	0.06345	0.0018	0.392268	15.7604	0.447105	0.0538	0.0052	0.281628	0.491301	0.031	0.0636213	0.0018	0.409142	0.01922	0.0024	0.0538	0.0052	384.7	8.3	48	348	75	210	396.6	3.8	11	388	11	22	2.21649	397.611	11	0.491301	0.031	0.0636213	0.0018	0.409142	Zircon	178.1	6.7	3.19	0.6	538	27	477800
BAL-02-05-27-r	Output_1_89	27.38	0.484	0.034	0.06324	0.0017	0.357395	15.8128	0.425075	0.0578	0.0057	0.262994	0.548342	0.034	0.0636064	0.0017	0.395836	0.01857	0.0024	0.0578	0.0057	372	8.3	47	504	84	220	395.3	3.3	10	403	12	22	1.91067	395.3	10	0.484	0.034	0.06324	0.0017	0.357395	Zircon	297.4	6.6	2.91	0.62	608.4	5.2	475200
BAL-02-05-28-c	Output_1_90	27.786	0.499	0.034	0.06466	0.0018	0.378214	15.4655	0.430528	0.0573	0.0055	0.278543	0.504702	0.034	0.0646114	0.0018	0.382154	0.02034	0.0026	0.0573	0.0055	406.9	8.8	51	489	68	210	403.9	4.1	11	410	12	23	1.4878	403.9	11	0.499	0.034	0.06466	0.0018	0.378214	Zircon	224.6	6.9	4.81	0.85	632.7	8.8	466700
BAL-02-05-28-r	Output_1_91	28.8	0.49	0.034	0.06512	0.0018	0.370077	15.3563	0.424467	0.0553	0.0054	0.272365	0.513702	0.034	0.0652629	0.0018	0.384653	0.0198	0.0025	0.0553	0.0054	396.3	9.3	50	414	83	210	406.6	4.7	11	403	12	23	0.8933	406.6	11	0.49	0.034	0.06512	0.0018	0.370077	Zircon	199.7	6.1	3.98	0.59	641	11	469600
BAL-02-05-29-r	Output_1_92	27.989	0.479	0.032	0.06407	0.0018	0.387653	15.6079	0.438493	0.0553	0.0053	0.281298	0.507834	0.032	0.0642305	0.0018	0.406361	0.01968	0.0025	0.0553	0.0053	393.8	7.8	49	402	69	210	400.3	4.4	11	396	11	22	1.08586	400.3	11	0.479	0.032	0.06407	0.0018	0.387653	Zircon	162.9	5.7	3.72	0.81	1005	14	465900
BAL-02-05-30-r	Output_1_93	13.183	0.478	0.036	0.0639	0.0021	0.399941	15.6494	0.514301	0.0559	0.0059	0.297293	0.4786	0.036	0.0637875	0.0021	0.400955	0.02032	0.0026	0.0559	0.0059	407	11	51	440	120	240	399.2	7.7	13	396	16	25	0.808081	398.618	13	0.4786	0.036	0.0637875	0.0021	0.400955	Zircon	185	10	4.41	0.97	577.9	9.1	489700
BAL-02-05-31-c	Output_1_94	29.611	0.465	0.032	0.06115	0.0017	0.374566	16.3532	0.454628	0.0557	0.0054	0.275648	0.478772	0.032	0.061227	0.0017	0.383632	0.01893	0.0024	0.0557	0.0054	379	6.3	47	423	76	220	382.6	3.9	10	387	12	22	1.13695	382.6	10	0.465	0.032	0.06115	0.0017	0.374566	Zircon	237	12	4.46	0.74	842	52	465200
BAL-02-05-33-r	Output_1_96	29.206	0.464	0.031	0.06368	0.0018	0.389645	15.7035	0.443881	0.0538	0.0052	0.280691	0.502556	0.031	0.0639298	0.0018	0.415237	0.01933	0.0025	0.0538	0.0052	386.9	8.3	49	352	71	220	397.9	4.3	11	387	11	21	2.81654	397.9	11	0.464	0.031	0.06368	0.0018	0.389645	Zircon	244	17	4.16	0.67	798	37	467500
BAL-02-05-33-c	Output_1_97	30.423	0.495	0.036	0.06282	0.0018	0.366559	15.9185	0.456117	0.0584	0.0059	0.272857	0.525886	0.036	0.0629867	0.0018	0.385238	0.01899	0.0025	0.0584	0.0059	380	12	49	519	93	220	392.7	5.1	11	407	14	24	3.51351	392.7	11	0.495	0.036	0.06282	0.0018	0.366559	Zircon	180.8	8.1	2.89	0.5	377	13	466800
BAL-02-05-34-r	Output_1_98	26.569	0.47	0.036	0.06293	0.0018	0.349834	15.8907	0.454524	0.0558	0.0059	0.261132	0.478284	0.036	0.0628834	0.0018	0.355458	0.0198	0.0025	0.0558	0.0059	396.3	7.4	50	430	110	220	393.4	4.9	11	392	16	25	0.357143	393.4	11	0.47	0.036	0.06293	0.0018	0.349834	Zircon	192.4	6.3	3.64	0.61	558.6	9.8	467100
BAL-02-05-36-c	Output_1_100	7.3014	0.468	0.05	0.0631	0.002	0.284419	15.8479	0.502309	0.0545	0.0069	0.242855	0.466409	0.05	0.063038	0.002	0.283787	0.0199	0.0029	0.0545	0.0069	399	28	57	410	200	280	394.3	6.6	13	388	28	34	1.62371	394.075	13	0.466409	0.05	0.063038	0.002	0.283787	Zircon	315	13	3.1	1.3	658	14	507600
BAL-02-05-37-r	Output_1_104	30.423	0.473	0.03	0.06243	0.0017	0.394511	16.0179	0.436177	0.0559	0.0053	0.276045	0.51967	0.03	0.0627483	0.0017	0.424844	0.01867	0.0024	0.0559	0.0053	373.9	5.6	47	439	59	220	390.4	3.5	10	393.5	8.5	20	0.787802	390.4	10	0.473	0.03	0.06243	0.0017	0.394511	Zircon	202.6	5.5	5.41	0.76	528.9	4.5	479100
BAL-02-06-01-c	Output_1_105	30.017	0.461	0.03	0.06312	0.0017	0.382411	15.8428	0.426692	0.054	0.0052	0.26935	0.52233	0.03	0.0635522	0.0017	0.422194	0.01862	0.0023	0.054	0.0052	372.9	5.5	47	353	67	210	394.6	3.4	10	386.8	9.5	20	2.01655	394.6	10	0.461	0.03	0.06312	0.0017	0.382411	Zircon	232	6.2	4.1	0.62	750	19	474900
BAL-02-06-01-r	Output_1_106	23.324	0.482	0.032	0.0623	0.0017	0.380157	16.0514	0.437999	0.0561	0.0054	0.272738	0.474266	0.032	0.062239	0.0017	0.375236	0.01961	0.0025	0.0561	0.0054	392.4	6.4	49	457	73	230	389.6	4	11	400	11	23	2.6	389.228	11	0.474266	0.032	0.062239	0.0017	0.375236	Zircon	638	22	4.25	0.8	570.7	8.5	464800
BAL-02-06-02-c	Output_1_107	27.38	0.486	0.035	0.0637	0.002	0.399643	15.6986	0.492891	0.0565	0.0057	0.297159	0.500037	0.035	0.0637331	0.002	0.409098	0.01977	0.0025	0.0565	0.0057	396	12	50	450	95	220	399	7	12	400	14	24	0.25	399	12	0.486	0.035	0.0637	0.002	0.399643	Zircon	254	11	3.66	0.65	486.4	5.8	477700
BAL-02-06-03-c	Output_1_108	6.8958	0.524	0.048	0.0636	0.0021	0.339099	15.7233	0.519165	0.0608	0.0071	0.272086	0.598303	0.048	0.0641372	0.0021	0.377864	0.0183	0.0027	0.0608	0.0071	367	27	53	700	160	250	399.4	7.5	13	427	25	32	6.4637	399.4	13	0.524	0.048	0.0636	0.0021	0.339099	Zircon	188	13	3.1	1.3	543	10	514000
BAL-02-06-04-c	Output_1_109	29.611	0.482	0.033	0.0632	0.0018	0.384087	15.8228	0.450649	0.0557	0.0054	0.281865	0.514976	0.033	0.0634452	0.0018	0.404835	0.01903	0.0024	0.0557	0.0054	380.9	8.4	48	425	72	210	395	4.1	11	400	11	22	1.25	395	11	0.482	0.033	0.0632	0.0018	0.384087	Zircon	262.2	7.8	3.95	0.68	662	16	480600
BAL-02-06-05-r	Output_1_110	27.178	0.478	0.033	0.06458	0.0018	0.374369	15.4847	0.431595	0.0546	0.0054	0.271255	0.487111	0.033	0.0645895	0.0018	0.380431	0.02013	0.0025	0.0546	0.0054	402.7	7.8	50	385	87	220	403.4	4.2	11	395	13	23	2.12658	403.476	11	0.487111	0.033	0.0645895	0.0018	0.380431	Zircon	248.7	6.1	3.86	0.7	576.4	8.3	476200
BAL-02-06-06-c	Output_1_111	27.38	0.461	0.029	0.06509	0.0019	0.420917	15.3633	0.448461	0.0522	0.0049	0.296941	0.492615	0.029	0.06529	0.0019	0.443142	0.01979	0.0025	0.0522	0.0049	396.1	6.9	50	294	49	210	406.5	5	11	385.9	7.7	20	5.33817	407.717	11	0.492615	0.029	0.06529	0.0019	0.443142	Zircon	225	13	4.37	0.74	844	57	463800
BAL-02-06-07-c	Output_1_113	15.211	0.502	0.039	0.06396	0.0019	0.357152	15.6348	0.464448	0.0586	0.006	0.278639	0.495615	0.039	0.063788	0.0019	0.354012	0.02041	0.0026	0.0586	0.006	408	12	52	530	110	230	399.7	5.9	12	418	16	24	4.37799	398.621	12	0.495615	0.039	0.063788	0.0019	0.354012	Zircon	263	12	4.34	0.97	728	20	459500
BAL-02-06-07-r	Output_1_114	28.192	0.525	0.036	0.06536	0.0018	0.372688	15.2999	0.421355	0.059	0.0058	0.26976	0.510052	0.036	0.0651842	0.0018	0.364346	0.02086	0.0026	0.059	0.0058	417.2	8.2	52	536	80	210	408.1	3.8	11	427	13	24	4.42623	407.077	11	0.510052	0.036	0.0651842	0.0018	0.364346	Zircon	200.5	6.7	4.48	0.68	499	14	472400
BAL-02-06-08-c	Output_1_115	26.975	0.47	0.034	0.06273	0.0019	0.386209	15.9413	0.48284	0.0543	0.0055	0.286496	0.466844	0.034	0.0627086	0.0019	0.38411	0.01967	0.0025	0.0543	0.0055	393.7	9.7	50	377	93	220	392.2	5.7	11	394	13	22	0.456853	392.2	11	0.47	0.034	0.06273	0.0019	0.386209	Zircon	248.8	8.6	3.39	0.66	514	12	476000
BAL-02-06-08-r	Output_1_116	28.597	0.469	0.032	0.06291	0.0018	0.386722	15.8957	0.454813	0.0541	0.0052	0.285306	0.460808	0.032	0.0628422	0.0018	0.381306	0.01987	0.0025	0.0541	0.0052	397.7	7.4	50	354	73	210	393.2	4.8	11	391	12	22	0.56266	393.2	11	0.469	0.032	0.06291	0.0018	0.386722	Zircon	189.5	5.9	4.53	0.73	590	28	473900
BAL-02-06-09-r	Output_1_117	13.183	0.477	0.034	0.06344	0.0018	0.369837	15.7629	0.447246	0.0549	0.0055	0.272499	0.506054	0.034	0.0636541	0.0018	0.387926	0.01926	0.0024	0.0549	0.0055	385.6	7.9	48	411	99	240	396.5	5	11	396	13	23	0.126263	396.5	11	0.477	0.034	0.06344	0.0018	0.369837	Zircon	653	30	2.32	0.89	738	15	447500
BAL-02-06-10-r	Output_1_118	26.163	0.474	0.034	0.06327	0.0018	0.36868	15.8053	0.449652	0.0555	0.0055	0.275936	0.513418	0.034	0.0635123	0.0018	0.393448	0.01929	0.0024	0.0555	0.0055	386.1	6.5	48	401	82	210	395.4	4	11	398	13	23	0.653266	395.4	11	0.474	0.034	0.06327	0.0018	0.36868	Zircon	171.3	7.3	4.18	0.76	1109	20	461800
BAL-02-06-12-c	Output_1_121	30.423	0.488	0.034	0.06341	0.0019	0.39508	15.7704	0.47254	0.0563	0.0055	0.293236	0.472312	0.034	0.0632481	0.0019	0.385119	0.02027	0.0026	0.0563	0.0055	403.4	9.2	47	459	73	200	396.3	5.9	12	403	12	23	1.66253	395.349	12	0.472312	0.034	0.0632481	0.0019	0.385119	Zircon	221.8	8.5	4.04	0.59	664	14	467100
BAL-02-06-13-c	Output_1_122	7.9099	0.518	0.041	0.06453	0.0018	0.33238	15.4967	0.432264	0.0588	0.0062	0.255745	0.525459	0.041	0.0645508	0.0018	0.336531	0.0201	0.0026	0.0588	0.0062	402	13	51	640	130	250	403.1	4.4	11	423	19	28	4.70449	403.1	11	0.518	0.041	0.06453	0.0018	0.33238	Zircon	471	41	5.5	1.1	834	24	454900
BAL-02-06-13-r	Output_1_123	26.772	0.471	0.031	0.06267	0.0018	0.399963	15.9566	0.458303	0.055	0.0054	0.28077	0.486237	0.031	0.0627621	0.0018	0.410246	0.01932	0.0024	0.055	0.0054	386.7	7.3	48	405	81	220	391.8	4.7	11	392	11	22	0.0510204	391.8	11	0.471	0.031	0.06267	0.0018	0.399963	Zircon	200.2	7.1	4.71	0.74	905	16	470400
BAL-02-06-14-c	Output_1_124	30.828	0.475	0.032	0.06173	0.0018	0.39722	16.1996	0.472367	0.0557	0.0054	0.288026	0.475895	0.032	0.0617467	0.0018	0.39776	0.01924	0.0024	0.0557	0.0054	385.2	7.6	48	429	80	220	386.1	4.7	11	393	11	22	1.75573	386.1	11	0.475	0.032	0.06173	0.0018	0.39722	Zircon	190.3	5.2	4.76	0.63	831	16	474300
BAL-02-06-16-r	Output_1_127	22.918	0.527	0.039	0.0634	0.002	0.392131	15.7729	0.497567	0.0607	0.0063	0.290805	0.476463	0.039	0.0629569	0.002	0.361813	0.02124	0.0027	0.0607	0.0063	424.9	9.9	53	600	110	220	396.1	6.5	12	428	16	26	7.45327	393.583	12	0.476463	0.039	0.0629569	0.002	0.361813	Zircon	196.5	7.3	5.3	1.1	727	20	477500
BAL-02-06-17-c	Output_1_128	28.8	0.483	0.031	0.0641	0.0018	0.400836	15.6006	0.438083	0.0546	0.0052	0.282814	0.534787	0.031	0.0645309	0.0018	0.433608	0.01894	0.0024	0.0546	0.0052	379.2	5.1	47	388	60	220	400.5	3.7	11	400.4	8.4	21	0.024975	400.5	11	0.483	0.031	0.0641	0.0018	0.400836	Zircon	286	11	5.44	0.85	982	28	465400
BAL-02-06-18-c	Output_1_129	7.9099	0.476	0.059	0.0619	0.0025	0.309808	16.1551	0.652467	0.0552	0.007	0.303467	0.48663	0.059	0.0620293	0.0025	0.315449	0.0189	0.0026	0.0552	0.007	377	24	52	440	170	250	387	12	15	393	36	41	1.52672	387	15	0.476	0.059	0.0619	0.0025	0.309808	Zircon	629	48	4.2	1.8	718	21	460000
BAL-02-06-19-c	Output_1_130	27.989	0.489	0.031	0.06213	0.0017	0.396277	16.0953	0.440399	0.0565	0.0054	0.275231	0.512911	0.031	0.0623695	0.0017	0.411107	0.01884	0.0024	0.0565	0.0054	377.2	5.5	47	455	60	210	388.5	3.9	10	403.7	8.6	21	3.76517	388.5	10	0.489	0.031	0.06213	0.0017	0.396277	Zircon	235.2	7.3	4.45	0.75	909	12	475000
Xenocryst
BAL-02-06-11-c	Output_1_120	16.225	0.539	0.039	0.06716	0.002	0.380596	14.8898	0.443413	0.0586	0.0059	0.283631	0.485817	0.039	0.0666958	0.002	0.349926	0.02164	0.0028	0.0586	0.0059	432.8	9.7	54	529	97	220	419	5.9	12	437	16	26	4.11899	416.218	12	0.485817	0.039	0.0666958	0.002	0.349926	Zircon	352	15	4.15	0.87	1287	54	450200
BAL-02-05-01-c	Output_1_50	17.116	0.529	0.035	0.06893	0.002	0.401618	14.5075	0.420933	0.0564	0.0055	0.28518	0.392113	0.035	0.0677521	0.002	0.313987	0.0232	0.003	0.0564	0.0055	464	14	59	469	78	230	429.7	5.5	12	431	12	24	0.301624	429.7	12	0.529	0.035	0.06893	0.002	0.401618	Zircon	209.9	7.4	10.6	1.3	633	16	459300
BAL-02-03-32-c	Output_1_42	4.1409	0.606	0.069	0.0696	0.0022	0.267495	14.3678	0.454155	0.0636	0.0085	0.230161	0.45126	0.069	0.0682985	0.0022	0.206139	0.02421	0.0032	0.0636	0.0085	483	19	63	780	160	220	433.8	8	13	480	38	44	9.625	433.8	13	0.606	0.069	0.0696	0.0022	0.267495	Zircon	273.4	9.5	3.6	2.3	946	39	451200
BAL-02-03-17-r	Output_1_20	19.531	0.609	0.045	0.07234	0.0021	0.36566	13.8236	0.401294	0.061	0.0062	0.274632	0.419902	0.045	0.0707991	0.0021	0.266746	0.02614	0.0033	0.061	0.0062	521	12	66	639	96	220	450.2	5.8	13	481	17	28	6.40333	450.2	13	0.609	0.045	0.07234	0.0021	0.36566	Zircon	194.6	9.7	6.5	1.4	651	16	437300
Pb-loss
BAL-01-01-06-r	Output_1_167	20.462	0.446	0.049	0.05847	0.0025	0.362678	17.1028	0.731263	0.0548	0.0062	0.353514	0.458035	0.049	0.0586055	0.0025	0.370392	0.01802	0.0027	0.0548	0.0062	360.9	7.9	53	390	110	250	366.3	4.6	15	376	16	33	2.57979	366.3	15	0.446	0.049	0.05847	0.0025	0.362678	Zircon	162	7.4	5.22	0.97	945	14	481300
BAL-01-01-07-c	Output_1_168	31.623	0.474	0.048	0.06014	0.0025	0.37975	16.6279	0.691215	0.0576	0.0061	0.365386	0.420312	0.048	0.05967	0.0025	0.344424	0.01975	0.0029	0.0576	0.0061	395.3	9.5	58	498	73	240	376.5	4.6	15	395	11	34	4.68354	373.618	15	0.420312	0.048	0.05967	0.0025	0.344424	Zircon	462	17	5.58	0.82	1730	100	477000
BAL-01-02-11-c	Output_1_181	30.152	0.438	0.045	0.06016	0.0025	0.374966	16.6223	0.690755	0.0542	0.0059	0.356646	0.486977	0.045	0.0604695	0.0025	0.408393	0.01813	0.0027	0.0542	0.0059	363.1	7.2	53	354	81	230	376.5	4.7	15	371	12	32	1.48248	376.5	15	0.438	0.045	0.06016	0.0025	0.374966	Zircon	153.9	5	3.59	0.76	751	15	489000
BAL-01-02-12-r	Output_1_184	30.717	0.443	0.045	0.06	0.0025	0.3795	16.6667	0.694444	0.054	0.0058	0.36167	0.672372	0.045	0.0618592	0.0025	0.51692	0.01506	0.0022	0.054	0.0058	302.2	5	44	347	80	230	375.6	4.4	15	371	12	32	1.23989	375.6	15	0.443	0.045	0.06	0.0025	0.3795	Zircon	202.9	5.9	7.1	0.8	947	12	487300
BAL-01-02-13-c	Output_1_185	12.061	0.498	0.055	0.0581	0.0026	0.375537	17.2117	0.770231	0.0633	0.0074	0.3575	0.484474	0.055	0.0579156	0.0026	0.367736	0.01855	0.0028	0.0633	0.0074	371	11	55	760	110	230	364	7.1	16	410	18	37	11.2195	362.937	16	0.484474	0.055	0.0579156	0.0026	0.367736	Zircon	149	14	4.9	1.1	685	56	514000
BAL-01-02-13-r	Output_1_186	28.079	0.456	0.046	0.05995	0.0025	0.382032	16.6806	0.695603	0.0558	0.006	0.361583	0.495456	0.046	0.0602334	0.0025	0.408119	0.01809	0.0027	0.0558	0.006	362.4	6.8	53	442	78	250	375.3	3.6	15	380	10	32	1.23684	375.3	15	0.456	0.046	0.05995	0.0025	0.382032	Zircon	228.1	7	6.15	0.91	803	11	478700
BAL-01-02-15-r	Output_1_190	16.018	0.425	0.044	0.05923	0.0025	0.377525	16.8833	0.712618	0.0531	0.0058	0.360449	0.47125	0.044	0.0595413	0.0025	0.410135	0.018	0.0026	0.0531	0.0058	360.6	7.7	53	316	86	240	370.9	4.9	15	359	12	31	3.31476	370.9	15	0.425	0.044	0.05923	0.0025	0.377525	Zircon	467	32	5.5	1.3	1410	110	454800
BAL-01-04-01-r	Output_1_194	28.833	0.43	0.042	0.05987	0.0025	0.393097	16.7029	0.697464	0.0529	0.0055	0.372692	0.612186	0.042	0.0613165	0.0025	0.51088	0.0164	0.0024	0.0529	0.0055	328.8	5.5	48	319	59	240	374.8	4	15	362.8	6.6	30	3.30761	374.8	15	0.43	0.042	0.05987	0.0025	0.393097	Zircon	216.7	6.4	5.27	0.82	669.2	8.9	475000
BAL-02-03-33-r	Output_1_45	4.693	0.535	0.052	0.0597	0.0018	0.296277	16.7504	0.505038	0.0654	0.0077	0.24808	0.500957	0.052	0.0593942	0.0018	0.280261	0.01906	0.0024	0.0654	0.0077	381.7	4.4	47	770	160	260	373.8	5.7	11	434	28	34	13.871	371.94	11	0.500957	0.052	0.0593942	0.0018	0.280261	Zircon	394	34	16.4	3.2	1903	55	471000
BAL-02-05-06-r	Output_1_59	29.538	0.517	0.038	0.0596	0.0017	0.361783	16.7785	0.478582	0.0651	0.0065	0.274685	0.425095	0.038	0.0586973	0.0017	0.308218	0.02187	0.0028	0.0651	0.0065	437	13	56	793	87	210	373.2	4.5	10	425	16	26	12.1882	367.698	10	0.425095	0.038	0.0586973	0.0017	0.308218	Inclusion
BAL-02-05-35-c	Output_1_99	4.6648	0.46	0.03	0.0594	0.002	0.458745	16.835	0.566836	0.0568	0.0056	0.323184	0.55437	0.03	0.060136	0.002	0.523596	0.0169	0.0022	0.0568	0.0056	339	13	44	478	85	220	372.1	7.9	12	384.2	9.1	21	3.1494	372.1	12	0.46	0.03	0.0594	0.002	0.458745	Zircon	319	19	4.4	1.6	1147	26	486600
BAL-02-06-15-c	Output_1_126	18.659	0.452	0.03	0.06005	0.0018	0.411595	16.6528	0.499168	0.0539	0.0052	0.296711	0.476401	0.03	0.0602996	0.0018	0.428344	0.01819	0.0023	0.0539	0.0052	364.4	7.1	46	355	68	210	375.9	5.6	11	378.2	9.4	21	0.608144	375.9	11	0.452	0.03	0.06005	0.0018	0.411595	Zircon	222.5	9.1	4.16	0.76	826	37	467700
Discordant
BAL-01-01-01-c	Output_1_160	30.826	0.2241	0.022	0.02034	0.00091	0.414698	49.1642	2.19958	0.0808	0.0083	0.399307	0.516681	0.022	0.0227729	0.00091	0.684319	0.00485	0.00072	0.0808	0.0083	97.8	2.8	14	1224	35	200	129.8	2.4	5.7	205.2	3.6	18	36.7446								Inclusion
BAL-01-01-04-c	Output_1_164	31.092	0.454	0.045	0.0488	0.0026	0.473459	20.4918	1.09178	0.0681	0.0071	0.45505	0.670955	0.045	0.0505622	0.0026	0.608451	0.01419	0.0021	0.0681	0.0071	284.9	8.3	42	859	48	210	307	10	16	379.9	7.1	31	19.1893								Zircon	587	20	33.7	2.3	4060	120	427800
BAL-01-01-06-r	Output_1_166	2.3917	1.34	0.47	0.066	0.0068	0.281838	15.1515	1.56106	0.147	0.043	0.332215	0.65422	0.47	0.0603938	0.0068	0.154836	0.0296	0.0066	0.147	0.043	590	97	130	2150	720	760	412	38	41	840	220	230	50.9524								Zircon	231	16	6.4	2	1350	270	493000
BAL-01-02-06-c	Output_1_176	23.179	0.743	0.084	0.06484	0.0027	0.345625	15.4226	0.642211	0.0855	0.0099	0.338408	0.470031	0.084	0.0624251	0.0027	0.235229	0.0292	0.0045	0.0855	0.0099	582	27	88	1290	120	240	405	5	17	564	25	48	28.1915								Zircon	177.5	6.2	4.52	0.63	404.5	9.6	477400
BAL-01-02-08-r	Output_1_178	26.948	0.513	0.052	0.0528	0.0025	0.423216	18.9394	0.896752	0.0737	0.0079	0.404056	0.573673	0.052	0.0531087	0.0025	0.460878	0.01606	0.0024	0.0737	0.0079	321.9	8.9	47	1031	62	200	331.8	7.4	15	419	11	34	20.8115								Zircon	204	7.8	11	1.5	1211	29	503500
BAL-01-02-14-r	Output_1_188	9.6109	0.479	0.049	0.0534	0.0025	0.416145	18.7266	0.876713	0.0662	0.0076	0.377606	0.630896	0.049	0.0545866	0.0025	0.507944	0.01511	0.0023	0.0662	0.0076	303.2	9.8	45	790	110	240	335.1	7.2	15	397	13	34	15.5919								Zircon	503	24	19.6	3.9	1098	23	443000
BAL-01-04-02-c	Output_1_195	22.991	6.02	0.63	0.1054	0.0052	0.426421	9.48767	0.468082	0.416	0.047	0.400184		0.63	0.0502927	0.0052		0.03693	0.0054	0.416	0.047	733	13	110	3964	75	170	646	17	30	1970	37	93	67.2081								Inclusion
BAL-02-03-02-c	Output_1_2	3.6208	1.21	0.18	0.0689	0.0027	0.254735	14.5138	0.568755	0.126	0.019	0.251519	0.491887	0.18	0.0631234	0.0027	0.116096	0.033	0.0051	0.126	0.019	656	59	100	2010	220	280	429	13	17	800	76	82	46.375								Zircon	258	16	6.1	1.5	1641	78	517000
BAL-02-03-10-c	Output_1_11	26.605	0.518	0.033	0.06257	0.0017	0.392293	15.9821	0.434227	0.0589	0.0056	0.274767	0.53475	0.033	0.0627907	0.0017	0.401759	0.01925	0.0024	0.0589	0.0056	385.3	5.6	48	575	56	200	391.2	3.7	10	423.3	8.4	22	7.58327								Zircon	326	15	4.9	0.87	1670	100	475200
BAL-02-03-12-c	Output_1_13	12.975	0.515	0.038	0.06	0.0019	0.394381	16.6667	0.527778	0.0625	0.0066	0.287237	0.608086	0.038	0.0607513	0.0019	0.447551	0.01757	0.0023	0.0625	0.0066	352	11	45	660	120	230	375.9	7.1	12	424	15	25	11.3443								Zircon	171	12	6.2	1.4	1004	36	508800
BAL-02-03-15-rx	Output_1_17	26.542	0.709	0.058	0.06867	0.002	0.335403	14.5624	0.424127	0.0739	0.0082	0.253879	0.512319	0.058	0.0671362	0.002	0.254477	0.02545	0.0033	0.0739	0.0082	508	17	65	990	130	220	428.1	5.6	12	540	23	34	20.7222								Zircon	222.8	7.2	11	2	552	15	443500
BAL-02-03-16-c	Output_1_18	27.042	0.561	0.042	0.0611	0.0017	0.34836	16.3666	0.455372	0.0658	0.0066	0.267296	0.685642	0.042	0.0621825	0.0017	0.407555	0.01753	0.0022	0.0658	0.0066	351.1	9.9	45	798	94	220	382.3	4	10	450	17	27	15.0444								Zircon	146.7	5.5	5.4	1.1	665	47	492100
BAL-02-03-18-c	Output_1_21	27.882	0.53	0.038	0.06005	0.0017	0.367255	16.6528	0.471436	0.0631	0.0063	0.272793	0.589562	0.038	0.0606044	0.0017	0.399049	0.01777	0.0023	0.0631	0.0063	356	7.5	45	714	81	190	375.9	3.8	10	432	14	24	12.9861								Zircon	212	8.6	5.68	0.72	1022	53	505800
BAL-02-03-22-c	Output_1_27	17.116	0.628	0.043	0.06152	0.0018	0.392942	16.2549	0.475598	0.0735	0.0072	0.28619	0.668219	0.043	0.0618906	0.0018	0.411848	0.0187	0.0024	0.0735	0.0072	374	13	48	1014	70	200	384.8	5.2	11	494	14	27	22.1053								Zircon	262	10	6.2	1.2	1393	76	499800
BAL-02-03-26-c	Output_1_33	5.2451	1.125	0.11	0.0659	0.002	0.296437	15.1745	0.460531	0.126	0.015	0.247031	0.833749	0.11	0.0633499	0.002	0.232721	0.02444	0.0032	0.126	0.015	488	18	63	2020	150	220	411.3	6.6	12	763	42	53	46.0944								Zircon	234	13	11.7	3.9	956	48	499800
BAL-02-03-26-c	Output_1_34	19.048	0.556	0.041	0.05916	0.0017	0.363089	16.9033	0.485727	0.0681	0.007	0.269234	0.742238	0.041	0.0607	0.0017	0.452211	0.01557	0.002	0.0681	0.007	312.3	8.1	40	870	100	230	370.5	4.2	10	447	16	27	17.1141								Zircon	197	10	6.3	1.1	715	23	505700
BAL-02-03-29-r	Output_1_38	20.428	0.561	0.038	0.05948	0.0017	0.388756	16.8124	0.480515	0.0692	0.0068	0.279281	0.494454	0.038	0.0588805	0.0017	0.351683	0.01966	0.0025	0.0692	0.0068	393	11	50	904	75	190	372.4	5.2	11	453	13	25	17.7925								Zircon	167.1	8.1	13.7	4	837	60	469700
BAL-02-03-30-c	Output_1_39	25.949	0.59	0.043	0.063	0.0019	0.382362	15.873	0.47871	0.07	0.0072	0.281364	0.53878	0.043	0.0624328	0.0019	0.356291	0.02114	0.0027	0.07	0.0072	423	13	54	921	96	210	393.8	6	12	469	16	27	16.0341								Zircon	184	14	4.13	0.82	524	11	494600
BAL-02-03-31-r	Output_1_40	22.637	0.565	0.042	0.06485	0.0018	0.3498	15.4202	0.428009	0.0641	0.0066	0.260282	0.417299	0.042	0.063572	0.0018	0.270811	0.02293	0.0029	0.0641	0.0066	458	12	58	723	94	200	405	4.6	11	456	16	26	11.1842								Zircon	219.4	8.7	4.22	0.94	837	26	473100
BAL-02-03-33-r	Output_1_44	6.0733	1.508	0.13	0.0711	0.0021	0.32412	14.0647	0.415413	0.153	0.017	0.256901	0.469015	0.13	0.0626627	0.0021	0.120033	0.0421	0.006	0.153	0.017	833	57	120	2400	110	180	443.1	6.5	13	932	36	51	52.4571								Zircon	253	15	34.1	9	732	13	528000
BAL-02-03-34-c	Output_1_46	11.042	0.525	0.041	0.06155	0.0018	0.35069	16.2469	0.475134	0.0641	0.007	0.258681	0.562642	0.041	0.0617055	0.0018	0.371639	0.01887	0.0025	0.0641	0.007	378	13	49	710	130	230	385	5.3	11	427	18	27	9.83607								Zircon	211.8	8.4	5.2	1.5	815	33	499000
BAL-02-03-34-r	Output_1_47	9.3859	0.559	0.052	0.0591	0.002	0.341871	16.9205	0.572605	0.0696	0.0078	0.289074	0.584096	0.052	0.0592417	0.002	0.354575	0.01822	0.0024	0.0696	0.0078	365	12	47	890	140	240	369.9	7.5	12	449	26	33	17.6169								Zircon	202	13	5.9	1.7	882	29	494100
BAL-02-03-35-c	Output_1_48	4.969	0.576	0.064	0.057	0.0024	0.354357	17.5439	0.738689	0.0761	0.012	0.257979	0.384096	0.064	0.0552381	0.0024	0.252318	0.0232	0.0035	0.0761	0.012	464	38	69	1050	240	300	357	11	14	473	40	48	24.5243								Zircon	191	14	12.2	3.9	545	19	466700
BAL-02-03-36-c	Output_1_49	28.986	0.586	0.041	0.06241	0.0018	0.381112	16.0231	0.46213	0.069	0.0069	0.27712	0.694242	0.041	0.0632386	0.0018	0.434171	0.01799	0.0023	0.069	0.0069	360.3	8.9	46	880	88	210	390.2	5.2	11	467	14	26	16.4454								Zircon	255.2	7.9	5.28	0.91	800	41	501700
BAL-02-05-08-c	Output_1_62	26.163	0.641	0.052	0.06293	0.0018	0.332525	15.8907	0.454524	0.0756	0.0079	0.26401	0.475379	0.052	0.0614478	0.0018	0.25868	0.02282	0.003	0.0756	0.0079	456	16	59	1039	95	190	393.4	4.5	11	500	21	31	21.32								Zircon	233	8.2	24.4	3.7	868	23	456100
BAL-02-05-22-r	Output_1_83	30.828	0.622	0.043	0.0594	0.0017	0.382503	16.835	0.48181	0.0782	0.0076	0.282486	0.54725	0.043	0.0586348	0.0017	0.346172	0.02064	0.0026	0.0782	0.0076	412.9	9.5	52	1124	71	200	372	4.4	10	495	14	25	24.8485								Zircon	171.6	5.9	7.42	0.98	513.7	9.6	504900
BAL-02-05-24-r	Output_1_86	28.8	0.534	0.037	0.06348	0.0018	0.378749	15.753	0.446682	0.063	0.0063	0.272799	0.529135	0.037	0.0632989	0.0018	0.37671	0.02041	0.0026	0.063	0.0063	408	10	52	707	88	210	396.7	4.2	11	435	13	24	8.8046								Zircon	151.5	5.7	3.87	0.61	445.2	6.8	478300
BAL-02-05-32-c	Output_1_95	26.975	0.534	0.041	0.06161	0.0018	0.355643	16.2311	0.474209	0.0641	0.0066	0.272973	0.641073	0.041	0.0624063	0.0018	0.411116	0.0174	0.0022	0.0641	0.0066	348.6	8.5	44	740	110	230	385.4	5.6	11	435	17	26	11.4023								Inclusion
BAL-02-05-36-r	Output_1_101	10.952	0.87	0.065	0.0651	0.002	0.380305	15.361	0.47192	0.0974	0.01	0.286673	0.683648	0.065	0.0635378	0.002	0.314292	0.02314	0.0029	0.0974	0.01	462	11	58	1597	87	190	406.8	6.5	12	639	23	37	36.338								Zircon	146	11	6.8	1.4	874	39	502900
BAL-02-05-36-r	Output_1_102	9.9381	0.556	0.052	0.05995	0.0018	0.305671	16.6806	0.500834	0.0686	0.0077	0.25841	0.550778	0.052	0.0598182	0.0018	0.303671	0.01901	0.0026	0.0686	0.0077	381	19	51	910	160	260	375.3	5.9	11	453	26	34	17.1523								Zircon	126.7	7.8	6.7	1.3	414	21	463600
BAL-02-05-37-c	Output_1_103	10.141	0.549	0.04	0.0648	0.0019	0.373334	15.4321	0.452484	0.0622	0.0064	0.274053	0.61968	0.04	0.0653273	0.0019	0.4108	0.01914	0.0025	0.0622	0.0064	383	12	49	660	100	220	404.8	5.8	12	444	16	26	8.82883								Zircon	393	33	6.7	1.3	956	14	480000
BAL-02-06-06-r	Output_1_112	27.178	0.504	0.036	0.05891	0.0017	0.374591	16.975	0.489859	0.062	0.0061	0.28145	0.660259	0.036	0.0602022	0.0017	0.459886	0.01555	0.002	0.062	0.0061	311.9	8.7	40	681	83	220	368.9	5	11	413	13	24	10.678								Zircon	141.5	8.1	12.4	1.8	451	25	380000
BAL-02-06-11-c	Output_1_119	7.9099	7.16	1	0.1157	0.0083	0.456893	8.64304	0.620028	0.435	0.049	0.537168	0.271632	1	0.0622315	0.0083	0.0362046	0.144	0.024	0.435	0.049	2720	280	430	4046	91	150	705	44	48	2100	110	120	66.4286								Zircon	452	65	15.1	2.5	1060	28	481000
BAL-02-06-15-c	Output_1_125	2.8394	1.75	0.41	0.0749	0.0033	0.184816	13.3511	0.588234	0.17	0.038	0.193384	0.465308	0.41	0.0643575	0.0033	0.0580948	0.056	0.012	0.17	0.038	1100	190	240	2490	350	380	466	16	19	1010	140	150	53.8614								Zircon	206	21	3.07	0.49	582	22	526000
VAL-01
Concordant-Autocrysts
Spot #392	Output_1_167	26.24	0.575	0.056	0.0753	0.0049	0.55556	13.2802	0.864184	0.0567	0.0052	0.578676	0.624723	0.056	0.0755968	0.0049	0.585952	0.0226	0.0033	0.0567	0.0052	451	22	66	360	170	190	467.6	9.5	29	452	31	36	3.45133	467.6	29	0.575	0.056	0.0753	0.0049	0.55556	Zircon	321	40	6.4	1.4	0	0	466200
Spot #393	Output_1_168	26.246	0.583	0.04	0.0773	0.0049	0.678607	12.9366	0.820044	0.0558	0.0034	0.720944	0.625835	0.04	0.0775563	0.0049	0.703008	0.02314	0.0033	0.0558	0.0034	462	14	65	390	110	130	479.9	6.5	29	464	18	26	3.42672	481.52	29	0.625835	0.04	0.0775563	0.0049	0.703008	Zircon	366	40	6.8	1.5	0	0	474000
Spot #395	Output_1_170	26.242	0.604	0.035	0.07486	0.0047	0.734846	13.3583	0.838684	0.0596	0.0028	0.800661	0.624776	0.035	0.0749408	0.0047	0.745799	0.02287	0.0032	0.0596	0.0028	457	12	64	560	71	100	465.3	4.8	28	478	11	22	2.6569	465.3	28	0.604	0.035	0.07486	0.0047	0.734846	Zircon	999	75	24	10	0	0	485400
Spot #396	Output_1_171	26.242	0.627	0.038	0.07496	0.0047	0.719012	13.3405	0.836448	0.0618	0.0031	0.780858	0.794773	0.038	0.0762381	0.0047	0.790201	0.01813	0.0026	0.0618	0.0031	363	10	51	632	78	110	465.9	5.4	28	492	14	24	5.30488	465.9	28	0.627	0.038	0.07496	0.0047	0.719012	Zircon	1640	380	14.9	2.7	0	0	456100
Spot #402	Output_1_173	26.242	0.565	0.031	0.07329	0.0045	0.745661	13.6444	0.837767	0.0569	0.0024	0.82425	0.63932	0.031	0.0738185	0.0045	0.782615	0.02094	0.0029	0.0569	0.0024	418.8	6.1	58	469	57	96	455.9	4	27	453.9	9.2	20	0.440626	455.9	27	0.565	0.031	0.07329	0.0045	0.745661	Zircon	1840	280	15.8	2.5	0	0	453300
Spot #404	Output_1_175	26.242	0.559	0.037	0.07628	0.0048	0.689014	13.1096	0.824935	0.0542	0.003	0.750858	0.666508	0.037	0.0770702	0.0048	0.746501	0.0219	0.0031	0.0542	0.003	438	10	61	341	93	120	473.8	5.8	29	449	16	24	5.52339	473.8	29	0.559	0.037	0.07628	0.0048	0.689014	Inclusion
Spot #405	Output_1_176	25.891	0.576	0.039	0.07536	0.0047	0.677501	13.2696	0.827592	0.0566	0.0033	0.730503	0.634786	0.039	0.0757437	0.0047	0.71061	0.02257	0.0033	0.0566	0.0033	451	18	64	430	100	130	468.3	5.7	28	459	18	25	2.02614	468.3	28	0.576	0.039	0.07536	0.0047	0.677501	Zircon	383	51	5.4	1.5	0	0	459000
Spot #406	Output_1_177	25.891	0.608	0.041	0.07459	0.0047	0.682738	13.4066	0.844766	0.0604	0.0033	0.755534	0.789964	0.041	0.0759724	0.0047	0.766102	0.01961	0.0028	0.0604	0.0033	392	13	55	585	98	130	463.7	5.5	28	480	18	26	3.39583	463.7	28	0.608	0.041	0.07459	0.0047	0.682738	Zircon	830	120	28.4	5.5	0	0	460200
Spot #407	Output_1_178	26.246	0.577	0.035	0.0713	0.0053	0.774774	14.0252	1.04255	0.0617	0.0035	0.794963	0.613452	0.035	0.0713587	0.0053	0.79303	0.022	0.0033	0.0617	0.0035	439	23	65	612	96	120	443	18	32	461	13	22	3.90456	443	32	0.577	0.035	0.0713	0.0053	0.774774	Inclusion
Spot #408	Output_1_179	26.242	0.544	0.03	0.07226	0.0045	0.748653	13.8389	0.86182	0.0559	0.0024	0.823303	0.571552	0.03	0.0723816	0.0045	0.764096	0.02204	0.0031	0.0559	0.0024	440.7	7.7	61	430	54	93	449.7	4.5	27	440.3	8.8	20	2.13491	450.488	27	0.571552	0.03	0.0723816	0.0045	0.764096	Zircon	705	67	5.7	1.2	0	0	482000
Spot #409	Output_1_180	25.891	0.616	0.042	0.0768	0.0049	0.683266	13.0208	0.830756	0.0596	0.0035	0.735776	0.659621	0.042	0.0770352	0.0049	0.706742	0.02281	0.0032	0.0596	0.0035	456	13	64	540	100	120	476.9	7.9	29	484	18	26	1.46694	476.9	29	0.616	0.042	0.0768	0.0049	0.683266	Zircon	1060	160	7.3	1.4	0	0	468000
Spot #410	Output_1_181	26.242	0.559	0.037	0.07501	0.0047	0.687469	13.3316	0.835333	0.0546	0.0029	0.762816	0.569466	0.037	0.0750511	0.0047	0.693971	0.0232	0.0033	0.0546	0.0029	463	13	65	373	95	120	466.3	5.4	28	449	16	24	3.85301	466.515	28	0.569466	0.037	0.0750511	0.0047	0.693971	Zircon	483	49	5.7	1.4	0	0	470300
Spot #415	Output_1_182	26.244	0.567	0.031	0.07628	0.0047	0.747983	13.1096	0.807749	0.0551	0.0022	0.839205	0.614795	0.031	0.0765704	0.0047	0.772709	0.02284	0.0032	0.0551	0.0022	456.4	8.3	63	409	49	94	473.9	4.8	28	457	9.4	21	3.69803	475.619	28	0.614795	0.031	0.0765704	0.0047	0.772709	Zircon	517	53	3.2	1	0	0	451500
Spot #416	Output_1_183	26.594	0.548	0.032	0.0709	0.0045	0.735919	14.1044	0.8952	0.0576	0.0028	0.793902	0.607934	0.032	0.0712695	0.0045	0.768101	0.02027	0.0029	0.0576	0.0028	406	13	57	484	75	110	441.3	6.2	27	442	12	21	0.158371	441.3	27	0.548	0.032	0.0709	0.0045	0.735919	Zircon	370	49	4.8	1.2	0	0	479800
Spot #417	Output_1_184	26.242	0.519	0.041	0.0634	0.0044	0.659997	15.7729	1.09465	0.0617	0.0042	0.713911	0.74803	0.041	0.0651172	0.0044	0.776622	0.01549	0.0023	0.0617	0.0042	311	18	46	580	130	150	396	12	27	424	22	28	6.60377	396	27	0.519	0.041	0.0634	0.0044	0.659997	Zircon	413	45	69	17	0	0	481000
Spot #418	Output_1_185	26.24	0.591	0.037	0.0727	0.0046	0.710849	13.7552	0.87034	0.0605	0.0033	0.757415	0.586092	0.037	0.0725357	0.0046	0.708709	0.02331	0.0033	0.0605	0.0033	466	16	66	578	93	120	452.2	6.8	28	470	15	24	3.78723	451.414	28	0.586092	0.037	0.0725357	0.0046	0.708709	Zircon	356	44	8.8	2.1	0	0	467900
Spot #419	Output_1_186	25.891	0.586	0.047	0.0752	0.0048	0.622706	13.2979	0.8488	0.0576	0.0041	0.667619	0.852756	0.047	0.077291	0.0048	0.74793	0.01935	0.0028	0.0576	0.0041	387	16	56	440	140	160	467.3	7.5	29	463	24	31	0.928726	467.3	29	0.586	0.047	0.0752	0.0048	0.622706	Zircon	3600	500	8.9	2.1	0	0	470000
Spot #420	Output_1_187	25.893	0.599	0.034	0.07818	0.0049	0.741215	12.791	0.801687	0.0569	0.0026	0.80805	0.610856	0.034	0.0781619	0.0049	0.747795	0.02436	0.0034	0.0569	0.0026	486	11	67	462	64	98	485.2	5.8	29	475	10	21	2.14737	485.142	29	0.610856	0.034	0.0781619	0.0049	0.747795	Zircon	503	40	3.14	0.86	0	0	457700
Spot #421	Output_1_188	26.242	0.675	0.072	0.0758	0.0048	0.510486	13.1926	0.835416	0.0669	0.0064	0.551968	0.753929	0.072	0.0762499	0.0048	0.550362	0.0221	0.0034	0.0669	0.0064	441	30	67	710	140	150	470.6	8.3	29	514	32	36	8.44358	470.6	29	0.675	0.072	0.0758	0.0048	0.510486	Zircon	471	66	16.5	4.6	0	0	471000
Spot #422	Output_1_189	26.242	0.542	0.029	0.07109	0.0044	0.756508	14.0667	0.870634	0.0566	0.0023	0.835933	0.604602	0.029	0.0715	0.0044	0.788717	0.02083	0.0029	0.0566	0.0023	416.7	8.7	58	468	52	95	442.7	4.4	27	439	8.2	19	0.842825	442.7	27	0.542	0.029	0.07109	0.0044	0.756508	Zircon	1230	310	30.7	4.7	0	0	464000
Spot #423	Output_1_190	26.242	0.583	0.046	0.06745	0.0042	0.619504	14.8258	0.923178	0.0627	0.0035	0.744602	0.854938	0.046	0.0696822	0.0042	0.746003	0.01582	0.0023	0.0627	0.0035	317	17	47	660	78	99	420.7	4.8	25	462	20	26	8.93939	420.7	25	0.583	0.046	0.06745	0.0042	0.619504	Inclusion
Spot #424	Output_1_191	26.242	0.57	0.04	0.0744	0.0048	0.676799	13.4409	0.867152	0.0567	0.0033	0.742512	0.608007	0.04	0.0746177	0.0048	0.699124	0.02272	0.0032	0.0567	0.0033	454	12	63	430	100	130	462.7	8.2	29	455	19	26	1.69231	462.7	29	0.57	0.04	0.0744	0.0048	0.676799	Zircon	379	42	6	1.3	0	0	471100
Spot #429	Output_1_192	25.887	0.575	0.041	0.0753	0.0048	0.666484	13.2802	0.846547	0.0568	0.0035	0.718991	0.60173	0.041	0.0754004	0.0048	0.682695	0.02307	0.0033	0.0568	0.0035	461	16	65	430	110	130	467.7	7.8	29	458	19	26	2.1179	467.7	29	0.575	0.041	0.0753	0.0048	0.666484	Zircon	598	53	4.6	1.3	0	0	477000
Spot #430	Output_1_193	26.242	0.625	0.046	0.0775	0.0049	0.651623	12.9032	0.815817	0.0598	0.0039	0.696059	0.640947	0.046	0.0775182	0.0049	0.660949	0.02403	0.0034	0.0598	0.0039	480	16	67	530	120	140	481.2	7.4	29	489	22	29	1.59509	481.2	29	0.625	0.046	0.0775	0.0049	0.651623	Zircon	700	330	0.97	0.59	0	0	479000
Spot #431	Output_1_194	26.246	0.593	0.043	0.0751	0.0048	0.661232	13.3156	0.851062	0.0588	0.004	0.684735	0.602021	0.043	0.0750463	0.0048	0.667102	0.02353	0.0034	0.0588	0.004	470	17	66	490	130	150	467	7.8	29	469	21	28	0.426439	467	29	0.593	0.043	0.0751	0.0048	0.661232	Zircon	488	60	2.62	0.86	0	0	475800
Spot #432	Output_1_195	26.246	0.583	0.035	0.07237	0.0045	0.719413	13.8179	0.859202	0.0597	0.003	0.777766	0.573046	0.035	0.0721867	0.0045	0.714296	0.02334	0.0033	0.0597	0.003	466	10	65	555	82	110	450.4	4.9	27	465	13	23	3.13978	449.316	27	0.573046	0.035	0.0721867	0.0045	0.714296	Zircon	780	120	12.1	3.7	0	0	501100
Spot #433	Output_1_196	25.895	0.623	0.043	0.07419	0.0046	0.668275	13.4789	0.835732	0.0624	0.0038	0.713438	0.555969	0.043	0.0735189	0.0046	0.628945	0.02527	0.0036	0.0624	0.0038	504	12	70	620	110	130	461.3	5.2	28	489	19	27	5.66462	457.321	28	0.555969	0.043	0.0735189	0.0046	0.628945	Zircon	451	55	21.7	3.8	0	0	499400
Spot #434	Output_1_197	26.242	0.596	0.061	0.0743	0.0048	0.533766	13.4589	0.869488	0.0597	0.0059	0.54716	0.600371	0.061	0.0742105	0.0048	0.537017	0.0235	0.0035	0.0597	0.0059	470	24	69	460	190	210	462.1	9.6	29	470	35	40	1.68085	462.1	29	0.596	0.061	0.0743	0.0048	0.533766	Inclusion
Spot #435	Output_1_198	26.238	0.553	0.036	0.0714	0.0045	0.695568	14.0056	0.882706	0.0575	0.0032	0.749592	0.64883	0.036	0.0720798	0.0045	0.747466	0.02077	0.0029	0.0575	0.0032	415	11	58	484	90	120	444.6	6.1	27	448	15	22	0.758929	444.6	27	0.553	0.036	0.0714	0.0045	0.695568	Inclusion
Spot #436	Output_1_199	26.242	0.557	0.051	0.0762	0.005	0.582504	13.1234	0.861113	0.0561	0.005	0.592875	0.578575	0.051	0.0761136	0.005	0.597555	0.024	0.0035	0.0561	0.005	479	23	69	350	170	180	473	10	30	454	32	38	4.18502	472.883	30	0.578575	0.051	0.0761136	0.005	0.597555	Zircon	182	37	4.7	1.2	0	0	473000
Spot #437	Output_1_200	26.246	0.627	0.051	0.0727	0.0046	0.613998	13.7552	0.87034	0.0642	0.0049	0.63822	0.710184	0.051	0.0732478	0.0046	0.658295	0.02089	0.003	0.0642	0.0049	418	15	59	640	150	170	452.4	7.7	28	488	26	32	7.29508	452.4	28	0.627	0.051	0.0727	0.0046	0.613998	Zircon	291	41	12.7	2.6	0	0	506700
Spot #438	Output_1_201	26.242	0.582	0.037	0.0778	0.0049	0.703792	12.8535	0.809537	0.0554	0.0028	0.779926	0.588502	0.037	0.077755	0.0049	0.707932	0.02434	0.0034	0.0554	0.0028	486	14	68	394	82	110	482.7	6.2	29	464	15	24	4.03017	482.709	29	0.588502	0.037	0.077755	0.0049	0.707932	Zircon	604	51	3.2	1.1	0	0	463000
Spot #444	Output_1_203	26.242	0.602	0.039	0.0755	0.0047	0.692873	13.245	0.824525	0.0587	0.0031	0.762562	0.561205	0.039	0.0750947	0.0047	0.669222	0.02449	0.0035	0.0587	0.0031	489	13	68	526	93	120	469.3	6.1	28	476	16	25	1.40756	469.3	28	0.602	0.039	0.0755	0.0047	0.692873	Zircon	610	62	4.8	1.2	0	0	477000
Spot #445	Output_1_204	26.242	0.736	0.083	0.0751	0.0049	0.500792	13.3156	0.868793	0.0722	0.0074	0.537013	0.651667	0.083	0.0743184	0.0049	0.459719	0.0245	0.0036	0.0722	0.0074	489	21	70	790	200	210	467	11	30	543	43	48	13.9963	462.12	30	0.651667	0.083	0.0743184	0.0049	0.459719	Zircon	289	43	16.7	4.1	0	0	480400
Spot #446	Output_1_205	26.242	0.568	0.041	0.0753	0.0048	0.661937	13.2802	0.846547	0.0559	0.0035	0.71342	0.55006	0.041	0.0750543	0.0048	0.65117	0.02421	0.0035	0.0559	0.0035	483	16	68	390	110	130	468	6.9	29	453	20	27	3.31126	468	29	0.568	0.041	0.0753	0.0048	0.661937	Zircon	342	51	2.5	1.1	0	0	468600
Spot #447	Output_1_206	26.242	0.569	0.031	0.07424	0.0046	0.75098	13.4698	0.834607	0.0569	0.0024	0.826643	0.55156	0.031	0.0739896	0.0046	0.741807	0.02386	0.0033	0.0569	0.0024	476.5	9.5	66	468	56	94	461.6	4.3	28	456.9	9.1	20	1.02867	461.6	28	0.569	0.031	0.07424	0.0046	0.75098	Zircon	571	45	3	1.1	0	0	466000
Spot #448	Output_1_207	26.246	0.648	0.061	0.0773	0.005	0.566319	12.9366	0.83678	0.0626	0.0056	0.585939	0.644117	0.061	0.077114	0.005	0.564934	0.02451	0.0035	0.0626	0.0056	489	16	69	550	180	190	479.9	9.7	30	498	32	38	3.63454	479.9	30	0.648	0.061	0.0773	0.005	0.566319	Zircon	286	54	13.3	3.2	0	0	492200
Spot #449	Output_1_208	26.246	0.54	0.041	0.0709	0.0046	0.649641	14.1044	0.915093	0.0565	0.0036	0.713474	0.621117	0.041	0.0714655	0.0046	0.698138	0.0202	0.003	0.0565	0.0036	405	22	60	420	120	140	441.6	8.8	28	434	20	27	1.75115	441.6	28	0.54	0.041	0.0709	0.0046	0.649641	Zircon	455	52	8.7	1.7	0	0	482000
Spot #450	Output_1_209	26.242	0.543	0.034	0.069	0.0044	0.713528	14.4927	0.924176	0.0585	0.0031	0.769102	0.524291	0.034	0.0687376	0.0044	0.702494	0.02221	0.0031	0.0585	0.0031	444	10	62	526	91	120	430.1	6.7	26	439	14	22	2.02733	428.545	26	0.524291	0.034	0.0687376	0.0044	0.702494	Zircon	642	50	4	1.1	0	0	483000
Spot #451	Output_1_210	26.242	0.576	0.035	0.07021	0.0044	0.717936	14.243	0.892596	0.0606	0.0028	0.804888	0.641841	0.035	0.0706644	0.0044	0.75229	0.0204	0.0028	0.0606	0.0028	408.2	7.5	56	597	67	100	437.4	4.2	26	460	13	22	4.91304	437.4	26	0.576	0.035	0.07021	0.0044	0.717936	Zircon	561	60	52	12	0	0	514000
Spot #452	Output_1_211	26.242	0.573	0.037	0.0729	0.0046	0.698906	13.7174	0.865571	0.0588	0.0032	0.757261	0.560778	0.037	0.0726547	0.0046	0.692376	0.02379	0.0034	0.0588	0.0032	475	13	66	514	93	120	453.5	6.9	28	460	16	25	1.41304	452.129	28	0.560778	0.037	0.0726547	0.0046	0.692376	Zircon	442	44	3.09	0.99	0	0	475900
Spot #457	Output_1_212	26.242	0.571	0.033	0.072	0.0045	0.734212	13.8889	0.868056	0.0589	0.0026	0.816814	0.621329	0.033	0.0723018	0.0045	0.760679	0.02125	0.0031	0.0589	0.0026	425	17	61	553	58	93	448.2	6.6	27	457	11	21	1.9256	448.2	27	0.571	0.033	0.072	0.0045	0.734212	Inclusion
Spot #458	Output_1_213	26.594	0.687	0.045	0.07262	0.0045	0.687228	13.7703	0.853297	0.0698	0.0038	0.751249	0.543779	0.045	0.071353	0.0045	0.606139	0.0298	0.0043	0.0698	0.0038	594	22	84	892	88	110	451.9	4.9	27	529	17	26	14.5747	444.302	27	0.543779	0.045	0.071353	0.0045	0.606139	Zircon	492	53	66	38	0	0	502000
Spot #459	Output_1_214	26.234	0.578	0.032	0.06993	0.0044	0.750751	14.3	0.899758	0.0614	0.0027	0.819661	0.96799	0.032	0.0730131	0.0044	0.876747	0.01588	0.0022	0.0614	0.0027	318.4	7.6	44	632	61	97	435.7	4.4	26	462	10	21	5.69264	435.7	26	0.578	0.032	0.06993	0.0044	0.750751	Zircon	468	43	17.7	2.3	0	0	470000
Spot #460	Output_1_215	25.887	0.578	0.034	0.07427	0.0046	0.725092	13.4644	0.833933	0.058	0.0029	0.778097	0.56602	0.034	0.0740438	0.0046	0.718907	0.0243	0.0035	0.058	0.0029	485	17	68	497	82	110	461.8	5.3	28	462	12	22	0.04329	461.8	28	0.578	0.034	0.07427	0.0046	0.725092	Zircon	542	60	1.64	0.7	0	0	473700
Spot #461	Output_1_216	26.242	0.566	0.044	0.074	0.0047	0.632696	13.5135	0.858291	0.0571	0.0041	0.662543	0.555003	0.044	0.0737764	0.0047	0.62639	0.0241	0.0035	0.0571	0.0041	481	20	69	420	130	150	460.2	7.4	28	451	23	29	2.03991	460.2	28	0.566	0.044	0.074	0.0047	0.632696	Zircon	338	38	6.2	1.4	0	0	474100
Spot #462	Output_1_217	26.242	0.56	0.036	0.0722	0.0046	0.70393	13.8504	0.882436	0.0577	0.0028	0.795525	0.560304	0.036	0.0720867	0.0046	0.70468	0.02285	0.0033	0.0577	0.0028	456	19	66	515	86	120	449.5	7.4	28	453	15	24	0.772627	448.715	28	0.560304	0.036	0.0720867	0.0046	0.70468	Zircon	258	44	5.8	2.4	0	0	480000
Spot #463	Output_1_218	26.246	0.551	0.033	0.07255	0.0045	0.71938	13.7836	0.854944	0.0566	0.0029	0.770976	0.524291	0.033	0.0722092	0.0045	0.70358	0.02366	0.0033	0.0566	0.0029	473	11	66	438	85	110	451.4	5.2	27	444	13	22	1.66667	451.4	27	0.551	0.033	0.07255	0.0045	0.71938	Zircon	524	71	5.3	1.1	0	0	471000
Spot #464	Output_1_219	25.887	0.54	0.053	0.0709	0.0046	0.551448	14.1044	0.915093	0.057	0.0054	0.565041	0.53847	0.053	0.0707485	0.0046	0.55118	0.0226	0.0033	0.057	0.0054	451	20	65	360	180	190	441.6	8.2	27	430	30	35	2.69767	440.664	27	0.53847	0.053	0.0707485	0.0046	0.55118	Zircon	340	49	5.9	1.4	0	0	485000
Spot #465	Output_1_220	26.242	0.539	0.031	0.06883	0.0043	0.735702	14.5285	0.907639	0.0584	0.0028	0.793303	0.550192	0.031	0.0687989	0.0043	0.742744	0.02153	0.003	0.0584	0.0028	430	12	60	514	73	110	429.1	5.8	26	437	11	21	1.80778	429.1	26	0.539	0.031	0.06883	0.0043	0.735702	Zircon	364	51	7.6	1.5	0	0	471000
Discordant
Spot #391	Output_1_166	26.24	0.571	0.032	0.07672	0.0048	0.74487	13.0344	0.8155	0.0549	0.0024	0.819723	0.617472	0.032	0.0770222	0.0048	0.768882	0.02263	0.0032	0.0549	0.0024	452.2	9.3	63	400	60	100	476.5	5.2	29	458	9.4	20	4.0393	478.324	29	0.617472	0.032	0.0770222	0.0048	0.768882	Inclusion
Spot #394	Output_1_169	26.242	0.476	0.069	0.0319	0.0025	0.475584	31.348	2.45674	0.1047	0.0084	0.698769	0.851183	0.069	0.0351597	0.0025	0.659415	0.00757	0.0014	0.1047	0.0084	152	17	27	1650	130	140	203	10	16	382	37	39	46.8586								Inclusion
Spot #401	Output_1_172	26.594	0.586	0.039	0.0648	0.0042	0.69769	15.4321	1.00023	0.0671	0.0042	0.719328	1.20325	0.039	0.0697609	0.0042	0.880509	0.01065	0.0017	0.0671	0.0042	214	17	34	790	110	130	405.9	8	27	466	16	24	12.897								Zircon	509	63	34.9	8.1	0	0	480300
Spot #403	Output_1_174	26.24	1.07	0.15	0.0803	0.0056	0.445399	12.4533	0.868474	0.097	0.011	0.523839	0.300719	0.15	0.073998	0.0056	0.150001	0.036	0.0069	0.097	0.011	711	92	130	1340	210	220	498	16	33	723	71	76	31.1203								Zircon	985	76	27	7.9	0	0	436000
Spot #443	Output_1_202	26.242	0.623	0.045	0.068	0.0044	0.667242	14.7059	0.951557	0.0682	0.0044	0.708144	0.79142	0.045	0.0692489	0.0044	0.745187	0.0186	0.0027	0.0682	0.0044	372	15	53	840	130	150	424.1	7.8	26	492	22	30	13.8008								Zircon	291	43	18.9	8.2	0	0	500600
NORTHERN SUBSURFACE THOMSON OROGEN
BUD-01
Concordant-Autocrysts
BUD-04-01-03-c	Output_1_97	37.353	0.58	0.027	0.07691	0.0021	0.505936	13.0022	0.355021	0.0545	0.002	0.596941	0.591492	0.027	0.0770228	0.0021	0.512784	0.02373	0.0012	0.0545	0.002	474	6.8	23	384	58	79	477.6	3.7	13	463.5	9.7	17	3.04207	478.328	13	0.591492	0.027	0.0770228	0.0021	0.512784	Zircon	336	16	6.6	0.67	1480	110	427600
BUD-04-01-05-c	Output_1_99	42.287	0.621	0.03	0.0766	0.0021	0.493557	13.0548	0.3579	0.0589	0.0024	0.558226	0.609177	0.03	0.0764969	0.0021	0.4869	0.02398	0.0012	0.0589	0.0024	479	7.7	24	534	68	85	476.2	3.7	12	489	12	19	2.61759	475.179	12	0.609177	0.03	0.0764969	0.0021	0.4869	Zircon	303	21	7.11	0.71	2140	180	421700
BUD-04-01-07-r	Output_1_101	22.2	0.668	0.035	0.07783	0.0022	0.474802	12.8485	0.363186	0.0615	0.0029	0.514149	0.565537	0.035	0.0770614	0.0022	0.418876	0.02818	0.0015	0.0615	0.0029	564	16	31	647	85	99	483.1	4.3	13	518	15	22	6.73745	478.559	13	0.565537	0.035	0.0770614	0.0022	0.418876	Zircon	268	10	3.73	0.49	630	37	455600
BUD-04-01-09-r	Output_1_103	29.248	0.602	0.029	0.07669	0.0021	0.494174	13.0395	0.357061	0.0565	0.0021	0.593142	0.55695	0.029	0.0763615	0.0021	0.467021	0.02486	0.0012	0.0565	0.0021	496.3	7.9	24	455	65	85	476.3	4.4	13	478	11	19	0.355649	476.3	13	0.602	0.029	0.07669	0.0021	0.494174	Zircon	230	14	3.5	0.41	864	49	438100
BUD-04-01-10-c	Output_1_104	37.706	0.636	0.03	0.0749	0.0022	0.528592	13.3511	0.392156	0.0617	0.0025	0.586922	0.574241	0.03	0.0743877	0.0022	0.49264	0.02481	0.0013	0.0617	0.0025	495.2	9.6	25	654	71	89	465.7	6	13	499	11	19	6.67335	462.536	13	0.574241	0.03	0.0743877	0.0022	0.49264	Zircon	187	25	4.47	0.51	636	91	438100
BUD-04-01-13-r	Output_1_107	37.353	0.58	0.026	0.07269	0.002	0.523103	13.757	0.378513	0.0577	0.002	0.621721	0.486563	0.026	0.0719414	0.002	0.461532	0.02372	0.0011	0.0577	0.002	473.7	4.3	22	509	54	77	452.3	3.1	12	463.7	9.2	17	2.45849	452.3	12	0.58	0.026	0.07269	0.002	0.523103	Zircon	394	15	7.37	0.64	2189	28	427800
BUD-04-02-01-r	Output_1_108	12.686	0.579	0.032	0.0761	0.0022	0.463498	13.1406	0.379886	0.0556	0.0025	0.540809	0.550245	0.032	0.0758313	0.0022	0.446399	0.0243	0.0013	0.0556	0.0025	485	12	26	423	83	99	473	6.5	13	463	14	20	2.15983	473	13	0.579	0.032	0.0761	0.0022	0.463498	Zircon	970	140	5.68	0.92	1142	63	412700
BUD-04-02-02-c	Output_1_109	38.763	0.581	0.028	0.07512	0.0021	0.501765	13.312	0.372142	0.0561	0.0021	0.598361	0.584021	0.028	0.0751464	0.0021	0.503581	0.02332	0.0011	0.0561	0.0021	465.8	6.5	23	445	62	83	466.9	4.3	12	464	11	18	0.625	467.087	12	0.584021	0.028	0.0751464	0.0021	0.503581	Zircon	219.1	7.5	5.26	0.5	1192	42	433300
BUD-04-02-04-c	Output_1_113	38.058	0.671	0.034	0.07647	0.0022	0.493741	13.077	0.376219	0.0646	0.0025	0.596606	0.600575	0.034	0.0758145	0.0022	0.456145	0.02508	0.0013	0.0646	0.0025	501	11	26	738	65	84	475	5.7	13	525	13	21	9.52381	471.091	13	0.600575	0.034	0.0758145	0.0022	0.456145	Zircon	201.2	9.2	9.8	2	1014	59	424700
BUD-04-02-05-r	Output_1_114	39.115	0.59	0.03	0.07666	0.0021	0.474292	13.0446	0.35734	0.0561	0.0023	0.555564	0.618057	0.03	0.0768671	0.0021	0.490487	0.02344	0.0011	0.0561	0.0023	468.3	6.2	23	449	73	92	476.1	4.4	13	474	12	18	0.443038	476.1	13	0.59	0.03	0.07666	0.0021	0.474292	Zircon	241.7	9.4	5.89	0.56	1209	38	435200
BUD-04-02-06-r	Output_1_115	39.468	0.609	0.03	0.07607	0.0021	0.488872	13.1458	0.362905	0.0583	0.0024	0.556959	0.614086	0.03	0.0760935	0.0021	0.491854	0.02359	0.0012	0.0583	0.0024	471.3	9.9	24	519	75	93	472.6	4.2	13	483	13	19	2.15321	472.6	13	0.609	0.03	0.07607	0.0021	0.488872	Zircon	220.1	5.7	7.29	0.53	564	16	438100
BUD-04-02-07-r	Output_1_116	28.191	0.613	0.028	0.07507	0.0021	0.522268	13.3209	0.372637	0.0588	0.0021	0.616631	0.59564	0.028	0.0749661	0.0021	0.511909	0.02362	0.0011	0.0588	0.0021	471.9	5.2	23	554	57	79	466.6	4.1	12	485	9.1	17	3.79381	466.006	12	0.59564	0.028	0.0749661	0.0021	0.511909	Zircon	238.2	7.4	5.59	0.47	864	26	431000
BUD-04-02-08-r	Output_1_117	39.82	0.62	0.035	0.07587	0.0021	0.440241	13.1804	0.36482	0.0599	0.0029	0.496325	0.574925	0.035	0.0754499	0.0021	0.415801	0.02504	0.0014	0.0599	0.0029	500	17	29	578	82	95	471.4	4.6	13	491	15	21	3.99185	468.906	13	0.574925	0.035	0.0754499	0.0021	0.415801	Zircon	166.7	4.6	6.9	1.5	444	12	417000
BUD-04-02-09-c	Output_1_119	22.905	0.605	0.034	0.077	0.0023	0.469336	12.987	0.387924	0.0575	0.0027	0.536731	0.650549	0.034	0.0773296	0.0023	0.494608	0.02299	0.0013	0.0575	0.0027	459	14	25	504	88	100	478.1	6.3	14	479	15	21	0.187891	478.1	14	0.605	0.034	0.077	0.0023	0.469336	Zircon	207.9	6.9	5.99	0.77	549	9.3	410800
BUD-04-02-10-c	Output_1_120	33.125	0.598	0.032	0.07772	0.0022	0.467591	12.8667	0.364214	0.0554	0.0026	0.516479	0.553842	0.032	0.077397	0.0022	0.441437	0.02503	0.0013	0.0554	0.0026	499.6	9.5	25	411	89	100	482.4	5.2	13	474	14	20	1.77215	482.4	13	0.598	0.032	0.07772	0.0022	0.467591	Zircon	319	18	5.48	0.58	698	24	432600
BUD-04-02-11-r	Output_1_121	16.915	0.573	0.044	0.0756	0.0023	0.368338	13.2275	0.402424	0.0553	0.0041	0.379625	0.591043	0.044	0.0757215	0.0023	0.377778	0.02321	0.0012	0.0553	0.0041	464	10	24	390	150	150	469.6	6.7	14	457	24	28	2.75711	470.534	14	0.591043	0.044	0.0757215	0.0023	0.377778	Zircon	246	10	4.79	0.72	756	12	404200
BUD-04-02-12-r	Output_1_122	29.953	0.614	0.03	0.0752	0.0021	0.496214	13.2979	0.37135	0.0594	0.0023	0.584949	0.61723	0.03	0.0752132	0.0021	0.498112	0.02335	0.0012	0.0594	0.0023	466.4	9.3	24	563	66	85	467.4	5.1	13	485	12	18	3.62887	467.4	13	0.614	0.03	0.0752	0.0021	0.496214	Zircon	1400	140	5.26	0.54	585	14	425200
BUD-04-02-13-r	Output_1_124	19.029	0.582	0.033	0.0759	0.0022	0.455173	13.1752	0.381891	0.0561	0.0028	0.5022	0.570394	0.033	0.0757657	0.0022	0.448566	0.02407	0.0013	0.0561	0.0028	481	12	26	433	96	110	471.6	6	13	467	16	22	0.985011	471.6	13	0.582	0.033	0.0759	0.0022	0.455173	Zircon	1080	100	4.14	0.57	556.8	6.6	412100
BUD-04-02-14-r	Output_1_125	9.5145	0.582	0.035	0.0778	0.0025	0.471277	12.8535	0.413029	0.054	0.003	0.500685	0.611866	0.035	0.0780683	0.0025	0.488488	0.02355	0.0013	0.054	0.003	470	14	26	350	110	120	482.8	8.4	15	465	17	22	3.82796	484.583	15	0.611866	0.035	0.0780683	0.0025	0.488488	Zircon	130.4	6.3	3.88	0.93	781	59	484400
BUD-04-02-15-c	Output_1_126	38.763	0.613	0.03	0.07556	0.0021	0.49382	13.2345	0.36782	0.0589	0.0024	0.563481	0.613916	0.03	0.0755646	0.0021	0.494355	0.02349	0.0012	0.0589	0.0024	469.2	8.7	23	555	72	90	469.5	4.5	13	484	12	19	2.99587	469.5	13	0.613	0.03	0.07556	0.0021	0.49382	Zircon	188	4	4.83	0.51	594	15	430600
BUD-04-02-16-c	Output_1_127	38.058	0.604	0.029	0.07564	0.0021	0.500576	13.2205	0.367042	0.0578	0.0023	0.572195	0.582227	0.029	0.075474	0.0021	0.487686	0.0241	0.0012	0.0578	0.0023	481.4	9.3	24	519	65	82	470	4.3	12	478	11	18	1.67364	469.051	12	0.582227	0.029	0.075474	0.0021	0.487686	Zircon	162	4.2	6.21	0.61	320.2	5.6	434200
BUD-04-02-17-c	Output_1_128	37.001	0.613	0.029	0.07782	0.0022	0.512966	12.8502	0.363279	0.0574	0.002	0.630059	0.611426	0.029	0.0777858	0.0022	0.51216	0.02427	0.0013	0.0574	0.002	485	10	25	490	53	75	483.1	4.8	13	484	11	18	0.18595	483.1	13	0.613	0.029	0.07782	0.0022	0.512966	Zircon	182.3	9.5	4.05	0.45	1050	100	444500
BUD-04-02-18-c	Output_1_130	37.001	0.618	0.034	0.0761	0.0021	0.448346	13.1406	0.362619	0.0585	0.0028	0.499476	0.625366	0.034	0.0761966	0.0021	0.452144	0.02336	0.0012	0.0585	0.0028	468	11	24	519	92	110	472.8	4.8	13	486	16	22	2.71605	472.8	13	0.618	0.034	0.0761	0.0021	0.448346	Zircon	184	11	4.7	0.47	501	31	433200
BUD-04-02-19-r	Output_1_131	35.591	0.596	0.028	0.07455	0.0021	0.514242	13.4138	0.377854	0.0572	0.0021	0.608733	0.588072	0.028	0.0745531	0.0021	0.509168	0.02319	0.0011	0.0572	0.0021	463.4	6.3	22	516	62	84	463.5	4.1	12	475	10	18	2.42105	463.529	12	0.588072	0.028	0.0745531	0.0021	0.509168	Zircon	205.6	8.1	6.31	0.56	930	29	442700
BUD-04-02-20-r	Output_1_133	6.6954	0.554	0.038	0.0743	0.0029	0.494567	13.4589	0.525316	0.0561	0.0046	0.429799	0.557037	0.038	0.0741575	0.0029	0.497329	0.02341	0.0015	0.0561	0.0046	468	19	29	430	170	180	462	13	17	447	20	25	3.3557	461.155	17	0.557037	0.038	0.0741575	0.0029	0.497329	Zircon	289	26	5.6	1.1	973	24	388100
BUD-04-02-21-c	Output_1_134	21.848	0.687	0.043	0.0781	0.0026	0.469586	12.8041	0.426257	0.0641	0.0034	0.531598	0.541177	0.043	0.0768855	0.0026	0.391607	0.0283	0.0017	0.0641	0.0034	564	20	33	730	99	110	484.8	9.5	16	529	21	25	8.35539	477.506	16	0.541177	0.043	0.0768855	0.0026	0.391607	Zircon	183.4	6.1	4.49	0.63	561.5	7.3	424900
BUD-04-03-01-r	Output_1_136	36.296	0.614	0.032	0.07388	0.0021	0.478812	13.5355	0.384738	0.0594	0.0025	0.559681	0.550915	0.032	0.0734392	0.0021	0.441675	0.02449	0.0013	0.0594	0.0025	489	11	25	594	79	96	459.5	4.6	12	488	13	20	5.84016	456.842	12	0.550915	0.032	0.0734392	0.0021	0.441675	Zircon	179.2	4.3	5.6	0.6	510	32	438500
BUD-04-03-02-r	Output_1_137	32.772	0.627	0.03	0.07656	0.0021	0.497347	13.0617	0.358274	0.0601	0.0023	0.58256	0.605385	0.03	0.0763251	0.0021	0.485416	0.02457	0.0012	0.0601	0.0023	490.7	7.3	24	605	66	84	475.5	4.2	13	495	12	19	3.93939	474.15	13	0.605385	0.03	0.0763251	0.0021	0.485416	Zircon	144.6	5.4	4.22	0.47	434	14	442200
BUD-04-03-03-c	Output_1_138	9.8669	0.595	0.042	0.075	0.0024	0.412888	13.3333	0.426667	0.0568	0.004	0.413693	0.580221	0.042	0.0749437	0.0024	0.40458	0.02345	0.0012	0.0568	0.004	469	11	24	490	150	160	466.2	8.2	14	473	23	27	1.43763	465.871	14	0.580221	0.042	0.0749437	0.0024	0.40458	Zircon	295	11	5.88	0.93	1312	36	466400
BUD-04-03-03-r	Output_1_140	16.21	0.621	0.035	0.077	0.0022	0.452158	12.987	0.371057	0.0593	0.0031	0.479589	0.612462	0.035	0.0768626	0.0022	0.447831	0.02438	0.0012	0.0593	0.0031	486.8	9.2	24	550	100	110	479.4	6.7	13	493	17	23	2.75862	477.368	13	0.612462	0.035	0.0768626	0.0022	0.447831	Zircon	574	55	4.36	0.53	397.4	6.1	404100
BUD-04-03-04-r	Output_1_141	34.534	0.616	0.03	0.07595	0.002	0.47563	13.1666	0.346716	0.0589	0.0023	0.559106	0.588937	0.03	0.0757246	0.002	0.460297	0.02431	0.0012	0.0589	0.0023	485.4	8.9	24	548	70	88	471.9	3.7	12	486	12	20	2.90123	470.553	12	0.588937	0.03	0.0757246	0.002	0.460297	Zircon	604	60	4.63	0.46	517.5	7.9	429800
BUD-04-03-05-r	Output_1_143	6.343	0.603	0.053	0.076	0.0029	0.398227	13.1579	0.502078	0.0582	0.0055	0.37441	0.606134	0.053	0.0759717	0.0029	0.400091	0.02373	0.0014	0.0582	0.0055	474	18	28	580	170	180	472	13	18	478	31	34	1.25523	472	18	0.603	0.053	0.076	0.0029	0.398227	Zircon	169.3	9.9	5.36	0.93	546	13	465000
BUD-04-03-06-c	Output_1_144	36.296	0.559	0.025	0.07354	0.002	0.519578	13.598	0.369814	0.0555	0.0019	0.622024	0.567035	0.025	0.0735771	0.002	0.524807	0.02278	0.0011	0.0555	0.0019	456.3	6.7	22	439	54	77	457.4	3.8	12	451.5	8.7	16	1.30676	457.671	12	0.567035	0.025	0.0735771	0.002	0.524807	Zircon	175.3	5.3	4.12	0.49	651	33	433000
BUD-04-03-08-r	Output_1_146	38.058	0.584	0.027	0.07423	0.002	0.50351	13.4716	0.36297	0.0567	0.0023	0.553283	0.5926	0.027	0.0743326	0.002	0.508493	0.02279	0.0011	0.0567	0.0023	455.4	7.2	22	498	72	90	461.5	4.2	12	467	10	18	1.17773	461.5	12	0.584	0.027	0.07423	0.002	0.50351	Zircon	175.2	4.3	5.08	0.54	492	14	441700
BUD-04-03-09-c	Output_1_147	17.267	0.588	0.034	0.07551	0.0022	0.449975	13.2433	0.385846	0.0567	0.0029	0.494969	0.577461	0.034	0.0754071	0.0022	0.443994	0.02376	0.0012	0.0567	0.0029	474.7	9.9	24	479	95	110	469.3	5.5	13	472	16	21	0.572034	469.3	13	0.588	0.034	0.07551	0.0022	0.449975	Zircon	235	18	5.99	0.84	887	19	480700
BUD-04-03-10-c	Output_1_149	24.667	0.6	0.034	0.07615	0.0021	0.437589	13.132	0.362142	0.0568	0.0024	0.546553	0.564313	0.034	0.0758902	0.0021	0.417363	0.02418	0.0012	0.0568	0.0024	483	9.6	24	505	82	100	473.1	4.5	13	476	16	21	0.609244	473.1	13	0.6	0.034	0.07615	0.0021	0.437589	Zircon	274.3	8.3	11.7	1.5	1093	27	406000
BUD-04-03-11-c	Output_1_150	33.829	0.582	0.03	0.07583	0.002	0.455506	13.1874	0.347815	0.0557	0.0024	0.522073	0.5737	0.03	0.0757613	0.002	0.450661	0.02378	0.0012	0.0557	0.0024	475	7.1	23	434	79	95	471.1	3.6	12	465	14	20	1.31183	471.1	12	0.582	0.03	0.07583	0.002	0.455506	Zircon	237.7	5.5	6.59	0.64	766.9	9.4	430100
BUD-04-03-12-c	Output_1_151	35.944	0.583	0.027	0.07461	0.002	0.500949	13.403	0.359282	0.0569	0.002	0.606409	0.571259	0.027	0.074497	0.002	0.4939	0.02355	0.0012	0.0569	0.002	470.5	7.6	23	484	61	84	464.4	4.5	12	465.9	9.3	17	0.321958	464.4	12	0.583	0.027	0.07461	0.002	0.500949	Zircon	242.2	6.1	5.23	0.45	831	14	433400
BUD-04-03-13-c	Output_1_152	39.82	0.609	0.031	0.0756	0.002	0.461152	13.2275	0.349934	0.0587	0.0025	0.527654	0.60288	0.031	0.0755287	0.002	0.457833	0.02371	0.0012	0.0587	0.0025	473.6	9.4	24	541	79	96	469.8	3.2	12	481	13	20	2.32848	469.379	12	0.60288	0.031	0.0755287	0.002	0.457833	Zircon	219.4	8.3	7.21	0.63	631	18	435700
BUD-04-03-14-c	Output_1_153	44.049	0.588	0.026	0.07486	0.0021	0.535704	13.3583	0.374731	0.0566	0.0018	0.661511	0.565198	0.026	0.0747067	0.0021	0.521421	0.0237	0.0012	0.0566	0.0018	473.4	7.2	23	464	45	70	465.3	5.4	13	469.1	8.2	16	0.810062	465.3	13	0.588	0.026	0.07486	0.0021	0.535704	Zircon	221	17	3.39	0.45	1040	110	423800
BUD-04-03-16-c	Output_1_156	35.591	0.584	0.029	0.0768	0.0025	0.548236	13.0208	0.423855	0.0569	0.0022	0.644051	0.640311	0.029	0.0771109	0.0025	0.582076	0.02313	0.0013	0.0569	0.0022	462	13	25	466	67	86	477	8.5	15	466	12	18	2.36052	477	15	0.584	0.029	0.0768	0.0025	0.548236	Zircon	210	10	5.49	0.55	681	55	428000
BUD-04-03-17-r	Output_1_158	39.468	0.607	0.032	0.07554	0.0021	0.466448	13.238	0.368015	0.0583	0.0024	0.559646	0.617843	0.032	0.075629	0.0021	0.472496	0.02326	0.0012	0.0583	0.0024	464.7	8.5	23	532	71	88	469.4	5.1	13	482	13	20	2.61411	469.4	13	0.607	0.032	0.07554	0.0021	0.466448	Zircon	236	6.4	8.03	0.67	652	14	436300
BUD-04-03-17-c	Output_1_159	40.525	0.586	0.027	0.07384	0.002	0.506778	13.5428	0.366815	0.0584	0.0021	0.601654	0.611808	0.027	0.0739832	0.002	0.522349	0.02274	0.0011	0.0584	0.0021	454.4	5.8	22	540	62	83	459.2	3.3	12	469	10	17	2.08955	459.2	12	0.586	0.027	0.07384	0.002	0.506778	Zircon	267.1	7.2	8.69	0.65	1081	38	431900
BUD-04-03-19-r	Output_1_161	42.287	0.619	0.032	0.07624	0.0021	0.470233	13.1165	0.361288	0.0598	0.0024	0.565868	0.630885	0.032	0.0762608	0.0021	0.477119	0.02365	0.0012	0.0598	0.0024	472.4	8.8	24	577	69	89	473.6	4	12	491	13	20	3.54379	473.6	12	0.619	0.032	0.07624	0.0021	0.470233	Zircon	208	4.4	6.12	0.51	603	11	430800
BUD-04-03-19-c	Output_1_162	33.477	0.576	0.029	0.07429	0.0021	0.489568	13.4608	0.380503	0.057	0.0025	0.541735	0.58661	0.029	0.0743147	0.0021	0.496254	0.02305	0.0012	0.057	0.0025	460.6	9.4	23	463	78	95	461.9	4.7	12	460	13	19	0.413043	461.9	12	0.576	0.029	0.07429	0.0021	0.489568	Zircon	232	14	7.21	0.66	673	45	436100
BUD-04-04-03-c	Output_1_168	37.706	0.603	0.029	0.07757	0.0021	0.490538	12.8916	0.349005	0.0568	0.0021	0.590791	0.580358	0.029	0.0773506	0.0021	0.477404	0.02471	0.0012	0.0568	0.0021	493.4	7.6	24	470	62	81	481.6	3.8	13	478	11	18	0.753138	481.6	13	0.603	0.029	0.07757	0.0021	0.490538	Zircon	246.8	8.9	5.46	0.49	960	42	429600
BUD-04-04-04-c	Output_1_169	37.001	0.588	0.028	0.07551	0.002	0.486085	13.2433	0.350769	0.0566	0.0022	0.563116	0.601004	0.028	0.075608	0.002	0.493746	0.02331	0.0011	0.0566	0.0022	465.8	6.1	23	471	68	87	469.3	3	12	472	11	17	0.572034	469.3	12	0.588	0.028	0.07551	0.002	0.486085	Zircon	228	8.9	5.81	0.52	1286	57	436900
BUD-04-04-05-r	Output_1_170	36.648	0.605	0.029	0.07278	0.002	0.497357	13.74	0.377577	0.0608	0.0022	0.604805	0.603295	0.029	0.0727264	0.002	0.496576	0.02277	0.0012	0.0608	0.0022	455.1	9	23	628	57	78	452.9	4.6	12	480	11	18	5.64583	452.56	12	0.603295	0.029	0.0727264	0.002	0.496576	Zircon	212.5	5.4	4.68	0.46	722.6	9.1	432600
BUD-04-04-07-r	Output_1_173	38.058	0.594	0.028	0.07657	0.002	0.48468	13.06	0.341124	0.0567	0.0021	0.576331	0.598828	0.028	0.076574	0.002	0.487666	0.0238	0.0012	0.0567	0.0021	475.3	6.4	23	475	60	80	475.6	2.8	12	473	10	18	0.549683	475.641	12	0.598828	0.028	0.076574	0.002	0.487666	Zircon	271	11	6.16	0.53	936	14	433900
BUD-04-04-10-r	Output_1_176	40.525	0.612	0.03	0.07703	0.0022	0.503418	12.982	0.370769	0.0581	0.0021	0.61998	0.606611	0.03	0.0769468	0.0022	0.500502	0.02419	0.0012	0.0581	0.0021	483	7.6	24	543	59	79	478.4	5.2	13	484	12	19	1.15702	477.873	13	0.606611	0.03	0.0769468	0.0022	0.500502	Zircon	182.7	5.7	5.25	0.5	606	30	433700
BUD-04-04-13-r	Output_1_179	34.886	0.706	0.038	0.07865	0.0022	0.461137	12.7146	0.355652	0.0648	0.0028	0.543425	0.617712	0.038	0.0779589	0.0022	0.416955	0.02616	0.0013	0.0648	0.0028	521.9	9.2	26	778	75	91	488	5	13	542	16	23	9.9631	483.928	13	0.617712	0.038	0.0779589	0.0022	0.416955	Inclusion
BUD-04-04-13-c	Output_1_180	19.381	0.649	0.035	0.07716	0.0022	0.467394	12.9601	0.36952	0.0617	0.0029	0.518652	0.622992	0.035	0.0768894	0.0022	0.453828	0.0246	0.0013	0.0617	0.0029	491	11	26	642	88	100	479.1	5.6	13	507	16	22	5.50296	477.529	13	0.622992	0.035	0.0768894	0.0022	0.453828	Zircon	189.1	7.4	5.88	0.95	749	19	460100
BUD-04-04-14-r	Output_1_181	36.648	0.622	0.03	0.07687	0.0021	0.492844	13.009	0.35539	0.059	0.0024	0.557526	0.533447	0.03	0.0761218	0.0021	0.440411	0.02636	0.0013	0.059	0.0024	526	10	26	561	70	89	477.4	4.5	13	491	11	19	2.76986	477.4	13	0.622	0.03	0.07687	0.0021	0.492844	Zircon	164.9	5.3	4.33	0.49	427	15	424100
BUD-04-04-15-r	Output_1_182	38.41	0.651	0.028	0.0744	0.0022	0.566529	13.4409	0.397445	0.0636	0.0023	0.633001	0.599144	0.028	0.0739667	0.0022	0.536923	0.02443	0.0012	0.0636	0.0023	487.8	6.8	24	717	55	75	462.7	6.3	13	512.2	8.2	17	9.66419	460.009	13	0.599144	0.028	0.0739667	0.0022	0.536923	Zircon	494	51	6.23	0.54	851	29	434000
BUD-04-04-15-c	Output_1_183	6.343	0.62	0.05	0.0763	0.0024	0.363377	13.1062	0.412251	0.0591	0.0043	0.396824	0.614425	0.05	0.0762425	0.0024	0.360773	0.02386	0.0013	0.0591	0.0043	477	11	25	550	160	170	474.2	8.7	15	489	27	31	3.02658	473.655	15	0.614425	0.05	0.0762425	0.0024	0.360773	Zircon	337	16	6.3	1.5	1224	36	407000
BUD-04-04-17-r	Output_1_185	37.353	0.627	0.028	0.07581	0.0022	0.544893	13.1909	0.382798	0.0605	0.0021	0.641414	0.682588	0.028	0.0762226	0.0022	0.575449	0.02248	0.0011	0.0605	0.0021	449.2	8.8	23	617	57	80	471	5.7	13	494.5	9.1	16	4.75228	471	13	0.627	0.028	0.07581	0.0022	0.544893	Zircon	177.9	5.8	4.27	0.52	574.6	5.8	430400
Xenocryst
BUD-04-04-05-c	Output_1_171	25.724	0.626	0.033	0.0789	0.0023	0.483921	12.6743	0.369465	0.057	0.0023	0.585603	0.584058	0.033	0.0786083	0.0023	0.459848	0.02539	0.0014	0.057	0.0023	507	15	28	496	78	97	489.4	6.4	14	492	14	21	0.528455	489.4	14	0.626	0.033	0.0789	0.0023	0.483921	Zircon	253.6	9.2	6.47	0.65	712	28	415700
BUD-04-03-20-r	Output_1_163	36.648	0.624	0.031	0.07959	0.0022	0.486207	12.5644	0.347301	0.0575	0.0023	0.568506	0.658171	0.031	0.079814	0.0022	0.505087	0.02405	0.0012	0.0575	0.0023	480.3	8.8	24	496	70	87	493.6	4.2	13	493	12	19	0.121704	493.6	13	0.624	0.031	0.07959	0.0022	0.486207	Zircon	189.3	4.4	5.39	0.55	529	11	427700
BUD-04-04-08-r	Output_1_174	26.077	0.605	0.032	0.08031	0.0022	0.459895	12.4518	0.341101	0.0549	0.0024	0.530994	0.527775	0.032	0.0796587	0.0022	0.414523	0.02684	0.0014	0.0549	0.0024	535	11	27	401	76	93	498	4.3	13	482	13	19	3.3195	498	13	0.605	0.032	0.08031	0.0022	0.459895	Zircon	309	23	5.12	0.54	639.8	9	411200
BUD-04-04-01-c	Output_1_165	8.1049	0.662	0.073	0.0804	0.0027	0.291329	12.4378	0.417688	0.061	0.0062	0.313724	0.594795	0.073	0.0797385	0.0027	0.265956	0.0268	0.002	0.061	0.0062	534	31	40	590	200	210	499	12	16	513	42	43	2.72904	499	16	0.662	0.073	0.0804	0.0027	0.291329	Zircon	131.5	8.2	5	1.1	519	10	483000
BUD-04-03-15-c	Output_1_155	26.429	0.659	0.038	0.0818	0.0025	0.468304	12.2249	0.373623	0.0586	0.0028	0.53883	0.581019	0.038	0.0811512	0.0025	0.426127	0.02723	0.0015	0.0586	0.0028	543	14	29	536	93	110	507	7.9	15	512	18	23	0.976562	507	15	0.659	0.038	0.0818	0.0025	0.468304	Zircon	171.8	6.8	5.43	0.72	437	11	416000
BUD-04-04-20-c	Output_1_189	28.543	0.698	0.042	0.0847	0.0034	0.554959	11.8064	0.473928	0.0602	0.002	0.770376	0.78648	0.042	0.0853816	0.0034	0.597781	0.02429	0.0015	0.0602	0.002	485	18	29	600	49	73	524	15	20	540	19	25	2.96296	524	20	0.698	0.042	0.0847	0.0034	0.554959	Zircon	447	24	5.33	0.68	1174	71	446800
BUD-04-03-09-c	Output_1_148	11.981	1.048	0.06	0.1144	0.0042	0.539805	8.74126	0.32092	0.0668	0.0029	0.645728	1.4054	0.06	0.117227	0.0042	0.642836	0.02421	0.0013	0.0668	0.0029	484	13	26	822	75	90	698	19	25	727	21	29	3.989	698	25	1.048	0.06	0.1144	0.0042	0.539805	Zircon	640	100	3.8	0.7	702	12	398200
BUD-04-04-19-c	Output_1_187	29.601	2.916	0.13	0.2301	0.0067	0.546832	4.34594	0.126544	0.0924	0.003	0.667659	2.22415	0.13	0.22473	0.0067	0.454379	0.0865	0.0046	0.0924	0.003	1677	40	85	1473	41	63	1335	16	35	1384	18	35	3.54046	1473	63	2.916	0.13	0.2301	0.0067	0.546832	Zircon	209.5	8.4	3.21	0.49	642	32	432900
Pb loss
BUD-04-02-12-c	Output_1_123	34.886	0.488	0.026	0.0611	0.002	0.523475	16.3666	0.535732	0.0573	0.0023	0.631985	0.313056	0.026	0.0597058	0.002	0.374053	0.02326	0.0012	0.0573	0.0023	464.7	7.9	23	487	71	90	382.4	7.1	12	403	12	18	5.11166	382.4	12	0.488	0.026	0.0611	0.002	0.523475	Zircon	255	12	6.09	0.65	890	42	432900
BUD-04-02-03-c	Output_1_110	8.8097	0.484	0.038	0.0641	0.0024	0.430446	15.6006	0.584111	0.0554	0.0036	0.499241	0.299799	0.038	0.0625421	0.0024	0.289763	0.02372	0.0013	0.0554	0.0036	474	15	27	460	120	130	401	11	15	400	23	26	0.25	401	15	0.484	0.038	0.0641	0.0024	0.430446	Zircon	370	130	4.54	0.73	1200	160	504000
BUD-04-01-04-r	Output_1_98	15.857	0.539	0.036	0.0675	0.002	0.40551	14.8148	0.438958	0.0571	0.003	0.491221	0.374933	0.036	0.0662181	0.002	0.300065	0.02447	0.0013	0.0571	0.003	489	11	25	492	98	110	421.1	6.7	12	437	19	23	3.63844	421.1	12	0.539	0.036	0.0675	0.002	0.40551	Zircon	326	17	11.4	2.4	922	47	395200
BUD-04-01-06-r	Output_1_100	38.41	0.6	0.027	0.06812	0.0019	0.52683	14.68	0.409453	0.064	0.002	0.665885	0.537203	0.027	0.0675981	0.0019	0.488095	0.0222	0.0011	0.064	0.002	443.8	9	23	736	44	69	424.8	4.8	11	476.7	9.4	17	10.8874	421.668	11	0.537203	0.027	0.0675981	0.0019	0.488095	Zircon	338.4	8.1	7.52	0.61	1408	22	453500
BUD-04-02-22-c	Output_1_135	27.839	0.554	0.027	0.0693	0.0022	0.545802	14.43	0.458096	0.0583	0.0024	0.610672	0.518765	0.027	0.0689881	0.0022	0.522443	0.02247	0.0011	0.0583	0.0024	449.1	8.7	23	530	72	89	432.1	7.3	13	447	11	18	3.33333	430.057	13	0.518765	0.027	0.0689881	0.0022	0.522443	Zircon	408	35	6.55	0.68	747	22	427600
BUD-04-03-07-c	Output_1_145	17.972	0.526	0.024	0.06962	0.0019	0.513314	14.3637	0.392	0.0546	0.002	0.597454	0.485261	0.024	0.0693035	0.0019	0.484819	0.02231	0.0011	0.0546	0.002	446	5.4	21	397	58	78	433.8	3.7	11	429.1	9	16	1.09532	433.8	11	0.526	0.024	0.06962	0.0019	0.513314	Zircon	324	11	6.07	0.73	1663	51	421900
BUD-04-02-04-r	Output_1_112	17.267	0.61	0.035	0.07118	0.002	0.439801	14.0489	0.394743	0.0616	0.0031	0.487493	0.550244	0.035	0.0707374	0.002	0.406178	0.02357	0.0012	0.0616	0.0031	471	11	24	654	93	110	443.3	5.2	12	483	16	22	8.21946	440.597	12	0.550244	0.035	0.0707374	0.002	0.406178	Zircon	380	27	5.06	0.81	571	12	426500
Discordant
BUD-04-01-01-r	Output_1_95	14.8	0.62	0.028	0.0735	0.0024	0.585922	13.6054	0.444259	0.0608	0.0022	0.669953	0.354515	0.028	0.0713618	0.0024	0.391776	0.0268	0.0029	0.0608	0.0022	534	51	57	640	55	74	457.3	8.1	14	489.4	9.7	18	6.55905								Zircon	339	26	6.25	0.69	1368	45	473000
BUD-04-01-02-r	Output_1_96	38.763	0.529	0.028	0.0588	0.0021	0.559328	17.0068	0.607386	0.0662	0.0027	0.658786	0.296985	0.028	0.0568275	0.0021	0.364926	0.02381	0.0012	0.0662	0.0027	475.5	9.8	24	812	68	85	368.4	9.4	13	430	13	18	14.3256								Zircon	170.4	9.3	10.2	1.2	748	39	351000
BUD-04-01-08-r	Output_1_102	13.038	0.617	0.038	0.0638	0.0021	0.471349	15.674	0.515915	0.0712	0.0038	0.524928	1.17782	0.038	0.0683344	0.0021	0.68971	0.01423	0.00089	0.0712	0.0038	286	12	18	970	100	110	398.7	7.6	13	487	19	24	18.1314								Zircon	305	12	4.76	0.75	1206	43	445400
BUD-04-01-11-r	Output_1_105	23.61	0.657	0.036	0.0621	0.0028	0.635402	16.1031	0.726064	0.0781	0.0038	0.679709	0.75676	0.036	0.0628266	0.0028	0.683689	0.0179	0.0016	0.0781	0.0038	358	27	32	1154	83	97	388	14	17	512	16	22	24.2188								Zircon	674	76	7.39	0.83	905	58	416100
BUD-04-01-12-r	Output_1_106	10.572	0.7	0.043	0.0653	0.0022	0.480877	15.3139	0.515937	0.0797	0.0049	0.480564	1.13603	0.043	0.068739	0.0022	0.645675	0.01572	0.00091	0.0797	0.0049	315	10	18	1200	100	110	407.8	8	13	538	20	25	24.2007								Zircon	273	10	7.7	1.6	1240	66	493700
BUD-04-02-03-c	Output_1_111	19.734	5.607	0.22	0.2737	0.0075	0.572573	3.65363	0.100118	0.1487	0.0039	0.722425	5.15159	0.22	0.27029	0.0075	0.544844	0.099	0.0048	0.1487	0.0039	1908	22	88	2330	15	45	1560	13	38	1916.9	8	34	18.6186								Zircon	406	21	78	17	726	43	407100
BUD-04-02-08-c	Output_1_118	31.363	0.305	0.017	0.0382	0.0016	0.600748	26.178	1.09646	0.0579	0.002	0.771488	0.0713129	0.017	0.0362583	0.0016	0.182019	0.02105	0.0011	0.0579	0.002	421.1	7.4	21	517	59	81	241.9	6.9	9.6	271.2	9.4	13	10.8038								Zircon	366	11	7.06	0.56	1685	70	412500
BUD-04-02-17-r	Output_1_129	17.972	0.392	0.028	0.0427	0.0029	0.689062	23.4192	1.59053	0.0682	0.0031	0.831047	3.15893	0.028	0.0655844	0.0029	0.980495	0.00378	0.00046	0.0682	0.0031	76.2	8.5	9.2	888	79	94	269	17	18	335	17	20	19.7015								Zircon	1200	130	8.7	1.1	1660	170	408700
BUD-04-02-20-r	Output_1_132	20.086	0.255	0.017	0.02848	0.001	0.466002	35.1124	1.23288	0.0657	0.0035	0.550324	0.0555068	0.017	0.0267896	0.001	0.120984	0.02216	0.0012	0.0657	0.0035	443	12	24	768	97	110	181	4.8	6.5	230	12	14	21.3043								Zircon	635	20	9.94	0.76	1888	47	473700
BUD-04-03-03-c	Output_1_139	14.448	1.385	0.084	0.1207	0.0047	0.54027	8.285	0.322614	0.0835	0.003	0.734954	1.67733	0.084	0.123008	0.0047	0.606577	0.0271	0.0014	0.0835	0.003	541	14	31	1296	46	63	734	21	27	885	27	35	17.0621								Zircon	699	51	12.9	3.2	1379	44	397900
BUD-04-03-05-c	Output_1_142	34.886	3.569	0.15	0.2072	0.0058	0.554333	4.82625	0.135098	0.1253	0.0033	0.728315	4.30723	0.15	0.212805	0.0058	0.616315	0.036	0.002	0.1253	0.0033	714	22	40	2031	18	47	1214	12	31	1541	13	33	21.22								Zircon	478	18	5.32	0.54	1119	11	427200
BUD-04-03-15-r	Output_1_154	20.439	0.565	0.043	0.0393	0.0019	0.536203	25.4453	1.23018	0.107	0.0087	0.51108	0.128717	0.043	0.0355532	0.0019	0.157963	0.0311	0.0026	0.107	0.0087	618	42	51	1710	150	160	249	10	12	452	24	28	44.9115								Zircon	536	45	8	1	1006	71	422500
BUD-04-03-16-r	Output_1_157	12.334	0.78	0.05	0.0741	0.0022	0.420269	13.4953	0.40067	0.0766	0.0042	0.476157	0.568605	0.05	0.0723526	0.0022	0.326802	0.029	0.0018	0.0766	0.0042	577	22	35	1166	92	100	460.8	6.3	13	589	25	31	21.7657								Zircon	164.1	7.3	4.82	0.89	463.7	7.8	479600
BUD-04-03-18-r	Output_1_160	36.296	0.657	0.032	0.07064	0.0019	0.483415	14.1563	0.380761	0.068	0.0025	0.590452	0.814772	0.032	0.0718914	0.0019	0.558286	0.01945	0.001	0.068	0.0025	389.2	9.1	20	865	59	79	440	3.9	12	513	11	19	14.23								Zircon	287	16	43	8.1	798	14	430900
BUD-04-03-21-r	Output_1_164	20.086	0.847	0.043	0.0655	0.002	0.515413	15.2672	0.466173	0.0942	0.004	0.583815	0.463126	0.043	0.0623203	0.002	0.326682	0.02962	0.0016	0.0942	0.004	590	14	31	1522	64	78	408.9	6.9	12	622	16	24	34.2605								Zircon	254.1	6.5	7.49	0.72	714	10	492000
BUD-04-04-02-c	Output_1_166	17.972	0.702	0.039	0.07429	0.002	0.436083	13.4608	0.362384	0.0694	0.003	0.528646	0.753375	0.039	0.0746402	0.002	0.459682	0.0224	0.0012	0.0694	0.003	447.7	9.8	23	895	75	91	462	4	12	539	18	24	14.2857								Zircon	232	14	5.62	0.66	969	27	474500
BUD-04-04-02-r	Output_1_167	14.448	0.618	0.039	0.06541	0.002	0.436033	15.2882	0.467457	0.069	0.0034	0.527259	1.15265	0.039	0.0697675	0.002	0.646428	0.01371	0.0008	0.069	0.0034	275.3	9.4	16	898	95	110	408.4	5.5	12	487	19	24	16.1396								Zircon	290	25	5.6	0.93	558	30	421700
BUD-04-04-06-r	Output_1_172	38.41	0.536	0.031	0.0508	0.0027	0.676647	19.685	1.04625	0.0774	0.0031	0.798631	0.386633	0.031	0.0495164	0.0027	0.562349	0.01878	0.0012	0.0774	0.0031	376	17	24	1136	59	75	319	15	17	434	15	20	26.4977								Zircon	497	32	6.94	0.68	1692	60	431800
BUD-04-04-09-r	Output_1_175	15.857	0.868	0.06	0.0767	0.0022	0.383264	13.0378	0.373966	0.0825	0.0053	0.407693	0.545576	0.06	0.0740328	0.0022	0.260856	0.0323	0.0023	0.0825	0.0053	643	34	45	1230	110	120	476.1	6.3	13	632	27	32	24.6677								Zircon	299	45	10.3	1.7	674	40	476500
BUD-04-04-11-c	Output_1_177	37.353	1.252	0.074	0.07289	0.0021	0.438161	13.7193	0.395261	0.1244	0.006	0.512815	0.689411	0.074	0.0683052	0.0021	0.275353	0.03103	0.0017	0.1244	0.006	618	16	33	1997	72	84	453.5	5.4	12	825	26	33	45.0303								Zircon	317	11	8.92	0.85	1314	44	439700
BUD-04-04-12-r	Output_1_178	34.886	0.617	0.031	0.0681	0.0021	0.52309	14.6843	0.452819	0.067	0.0026	0.622136	1.02329	0.031	0.0713353	0.0021	0.696902	0.01594	0.001	0.067	0.0026	320	13	20	834	62	80	424.3	7.3	13	487	13	19	12.8747								Inclusion
BUD-04-04-16-r	Output_1_184	34.886	0.785	0.04	0.06472	0.0019	0.49921	15.4512	0.453604	0.089	0.0042	0.528223	1.14383	0.04	0.0675949	0.0019	0.626492	0.01637	0.001	0.089	0.0042	328	14	21	1398	76	89	404.2	5.4	11	586	16	23	31.0239								Zircon	335	14	16.8	2.9	1017	51	471700
BUD-04-04-18-r	Output_1_186	12.686	0.837	0.062	0.0532	0.002	0.452569	18.797	0.706654	0.118	0.0094	0.426786	1.02405	0.062	0.0545121	0.002	0.518258	0.0153	0.001	0.118	0.0094	307	14	20	1890	140	140	333.8	9.7	12	615	29	34	45.7236								Zircon	827	70	14.7	2.4	2520	200	484000
BUD-04-04-19-r	Output_1_188	35.591	1.157	0.052	0.0932	0.0036	0.651796	10.7296	0.414449	0.091	0.0026	0.803964	0.839378	0.052	0.0905289	0.0036	0.540189	0.04396	0.0022	0.091	0.0026	869	12	42	1450	28	55	574	15	21	783	14	25	26.6922								Zircon	1213	39	33.4	5.1	3370	100	462000
BUD-04-04-20-c	Output_1_190	5.6382	0.495	0.035	0.0551	0.0017	0.399934	18.1488	0.559945	0.066	0.004	0.453671	0.566376	0.035	0.0556379	0.0017	0.443223	0.01621	0.001	0.066	0.004	325	14	20	790	110	120	345.8	6.2	11	408	19	23	15.2451								Zircon	380	18	8.2	2.2	1270	59	498000
TBC-01
Concordant-Autocrysts
TBC-01-01-01-r	Output_1_1	22.075	0.573	0.056	0.06905	0.0029	0.394822	14.4823	0.608234	0.0601	0.0063	0.371913	0.565424	0.056	0.0689967	0.0029	0.390658	0.02223	0.0033	0.0601	0.0063	444	17	66	606	49	220	430.4	5.3	18	462.2	9.6	38	6.88014	430.108	18	0.565424	0.056	0.0689967	0.0029	0.390658	Zircon	1641	43	7	1	3429	62	460500
TBC-01-01-02-c	Output_1_2	9.5402	0.579	0.066	0.07463	0.0032	0.352074	13.3994	0.574544	0.0555	0.0065	0.343797	0.678785	0.066	0.0755127	0.0032	0.399535	0.02079	0.0031	0.0555	0.0065	415.9	9.7	61	410	140	270	464	5.7	19	463	23	43	0.215983	464	19	0.579	0.066	0.07463	0.0032	0.352074	Zircon	333	18	1.9	0.82	1100	31	430000
TBC-01-01-08-c	Output_1_12	27.667	0.669	0.068	0.07639	0.0032	0.381036	13.0907	0.548374	0.0634	0.0067	0.3685	0.605229	0.068	0.0758815	0.0032	0.351403	0.0331	0.0054	0.0634	0.0067	658	45	100	697	69	230	474.5	4	19	521	14	41	8.92514	471.493	19	0.605229	0.068	0.0758815	0.0032	0.351403	Zircon	1496	47	6.29	0.95	2707	67	446500
TBC-01-01-22-c	Output_1_20	10.494	0.648	0.067	0.0757	0.0034	0.398426	13.21	0.593318	0.0624	0.0066	0.390862	0.66611	0.067	0.0758234	0.0034	0.407177	0.02285	0.0035	0.0624	0.0066	457	18	68	680	65	230	470.3	9.1	20	507	16	42	7.23866	470.3	20	0.648	0.067	0.0757	0.0034	0.398426	Zircon	1547	36	14.1	2.3	3083	57	428300
TBC-01-02-02-c	Output_1_41	27.428	0.58	0.058	0.07342	0.0031	0.388977	13.6203	0.575086	0.0571	0.006	0.372846	0.585787	0.058	0.0734856	0.0031	0.391967	0.02251	0.0033	0.0571	0.006	450	12	66	495	66	240	456.7	5.2	19	464	11	37	1.57328	456.7	19	0.58	0.058	0.07342	0.0031	0.388977	Zircon	479	11	5.28	0.88	956	14	465300
TBC-01-02-05-c	Output_1_44	29.575	0.599	0.069	0.074	0.0034	0.370481	13.5135	0.620891	0.0585	0.007	0.35846	0.637085	0.069	0.074331	0.0034	0.38906	0.02237	0.0033	0.0585	0.007	447	13	66	490	140	250	459.9	9.4	20	475	25	44	3.17895	459.9	20	0.599	0.069	0.074	0.0034	0.370481	Zircon	351	11	13.9	1.4	824	26	471800
TBC-01-02-08-c	Output_1_49	11.687	0.634	0.074	0.0735	0.0033	0.35902	13.6054	0.610857	0.0631	0.0076	0.349292	0.589973	0.074	0.0730974	0.0033	0.338657	0.0236	0.0035	0.0631	0.0076	471	16	70	700	140	270	457	8.4	20	496	26	46	7.8629	454.79	20	0.589973	0.074	0.0730974	0.0033	0.338657	Zircon	373	16	10.9	2	1899	44	479300
TBC-01-02-12-c	Output_1_54	29.575	0.588	0.057	0.07242	0.003	0.392956	13.8083	0.572011	0.0591	0.0061	0.372468	0.636549	0.057	0.0728021	0.003	0.418046	0.02209	0.0032	0.0591	0.0061	441.5	5.8	64	565	49	230	450.7	4.7	18	469.3	7.5	37	3.96335	450.7	18	0.588	0.057	0.07242	0.003	0.392956	Zircon	725	15	13.4	1.6	2950	150	432300
TBC-01-02-17-c	Output_1_61	25.997	0.587	0.062	0.0767	0.0033	0.377249	13.0378	0.560949	0.0553	0.0061	0.363381	0.647203	0.062	0.0772118	0.0033	0.407438	0.02247	0.0033	0.0553	0.0061	449	10	66	420	99	250	476.2	6.5	20	470	17	40	1.31915	476.2	20	0.587	0.062	0.0767	0.0033	0.377249	Zircon	563	24	10.3	1.1	917	22	475000
TBC-01-03-04-c	Output_1_76	3.3391	0.601	0.079	0.07	0.0037	0.373082	14.2857	0.755102	0.0626	0.0076	0.399184	0.604046	0.079	0.070001	0.0037	0.374704	0.0218	0.0034	0.0626	0.0076	437	25	68	680	140	260	436	14	22	477	35	50	8.59539	436	22	0.601	0.079	0.07	0.0037	0.373082	Inclusion
TBC-01-03-05-c	Output_1_78	28.382	0.572	0.057	0.07352	0.0031	0.389684	13.6017	0.573523	0.056	0.0059	0.371562	0.559429	0.057	0.0734547	0.0031	0.382674	0.02365	0.0035	0.056	0.0059	472	15	70	433	67	240	457.3	4.3	18	458	12	37	0.152838	457.3	18	0.572	0.057	0.07352	0.0031	0.389684	Zircon	961	22	7.4	1.2	1801	45	475000
TBC-01-03-06-r	Output_1_79	31.483	0.544	0.054	0.07113	0.0029	0.379927	14.0588	0.573182	0.0558	0.0059	0.359772	0.613952	0.054	0.0716783	0.0029	0.4179	0.01771	0.0026	0.0558	0.0059	354.9	8.6	52	441	56	220	442.9	3.4	18	441.5	9.3	35	0.317101	442.9	18	0.544	0.054	0.07113	0.0029	0.379927	Zircon	1486	33	9.2	1.1	2866	72	471800
TBC-01-03-07-c	Output_1_81	19.319	0.599	0.06	0.0774	0.0033	0.391644	12.9199	0.550848	0.0555	0.0059	0.372242	0.623565	0.06	0.0776576	0.0033	0.403989	0.02238	0.0033	0.0555	0.0059	447	15	66	443	76	260	480.6	6.1	20	476	11	38	0.966387	480.6	20	0.599	0.06	0.0774	0.0033	0.391644	Zircon	719	45	4.4	1	1561	57	458800
TBC-01-03-08-r	Output_1_84	28.859	0.552	0.054	0.07249	0.003	0.389617	13.795	0.570907	0.0556	0.0058	0.368765	0.615469	0.054	0.0729811	0.003	0.424259	0.0171	0.0026	0.0556	0.0058	343	15	52	431	47	230	451.1	3.7	18	447.1	8.5	37	0.894654	451.1	18	0.552	0.054	0.07249	0.003	0.389617	Zircon	1813	26	8.1	1.1	3542	45	464800
TBC-01-03-09-c	Output_1_85	27.19	0.573	0.06	0.0753	0.0032	0.376054	13.2802	0.564365	0.0552	0.0061	0.358934	0.634197	0.06	0.0758015	0.0032	0.407489	0.02191	0.0032	0.0552	0.0061	438	11	64	419	98	240	467.8	6	19	461	17	40	1.47505	467.8	19	0.573	0.06	0.0753	0.0032	0.376054	Zircon	280.4	7.7	6.24	0.75	701.2	9.3	469100
TBC-01-04-02-r	Output_1_93	30.767	0.564	0.055	0.0751	0.0031	0.389807	13.3156	0.549644	0.0544	0.0057	0.366536	0.644263	0.055	0.0757639	0.0031	0.432212	0.02151	0.0032	0.0544	0.0057	430.1	8.2	63	381	54	240	466.8	4.7	19	453.4	8.1	36	2.95545	466.8	19	0.564	0.055	0.0751	0.0031	0.389807	Zircon	916	17	7.08	0.97	1843	29	454700
TBC-01-05-01-c	Output_1_101	31.358	0.607	0.059	0.0694	0.0035	0.460552	14.4092	0.72669	0.0636	0.0065	0.442516	0.723113	0.059	0.0703411	0.0035	0.520657	0.01708	0.0026	0.0636	0.0065	342	18	53	727	36	220	432	13	21	483.6	8	36	10.67	432	21	0.607	0.059	0.0694	0.0035	0.460552	Inclusion
TBC-01-05-03-c	Output_1_105	27.106	0.642	0.066	0.07983	0.0033	0.373073	12.5266	0.517823	0.0583	0.0063	0.357289	0.568964	0.066	0.079239	0.0033	0.337901	0.0358	0.0054	0.0583	0.0063	711	27	110	554	74	220	495.1	5.2	20	504	15	41	1.76587	495.1	20	0.642	0.066	0.07983	0.0033	0.373073	Zircon	375	19	4.63	0.79	542	20	470900
TBC-01-05-04-c	Output_1_109	17.805	0.545	0.054	0.06974	0.003	0.39824	14.339	0.616819	0.0582	0.0061	0.379689	0.613953	0.054	0.0701872	0.003	0.437086	0.01834	0.0028	0.0582	0.0061	367	14	55	526	56	230	434.5	5.6	18	441	10	36	1.47392	434.5	18	0.545	0.054	0.06974	0.003	0.39824	Zircon	1770	110	8.9	1.2	3750	260	480400
TBC-01-05-04-r	Output_1_111	28.169	0.57	0.056	0.07456	0.0031	0.389734	13.412	0.557635	0.0559	0.0058	0.371966	0.573297	0.056	0.0745509	0.0031	0.391684	0.02336	0.0035	0.0559	0.0058	467	13	68	443	52	230	463.5	3.9	18	457.5	8	36	1.31148	463.515	18	0.573297	0.056	0.0745509	0.0031	0.391684	Zircon	1539	30	5.32	0.73	2946	46	471200
TBC-01-06-03-c	Output_1_115	29.232	0.568	0.056	0.0759	0.0031	0.382725	13.1752	0.538119	0.05465	0.0056	0.370258	0.579155	0.056	0.0759612	0.0031	0.388847	0.02256	0.0033	0.05465	0.0056	451	11	66	395	42	240	471.6	4	19	455.9	7.8	36	3.44374	471.971	19	0.579155	0.056	0.0759612	0.0031	0.388847	Zircon	1829	35	4.93	0.74	3481	76	459900
TBC-01-06-04-c	Output_1_116	31.889	0.604	0.06	0.07867	0.0033	0.38901	12.7113	0.533207	0.0568	0.0059	0.374452	0.661832	0.06	0.0790454	0.0033	0.418284	0.02337	0.0034	0.0568	0.0059	468.2	8.9	70	476	56	230	488.2	5	20	479	10	38	1.92067	488.2	20	0.604	0.06	0.07867	0.0033	0.38901	Zircon	351	26	2.68	0.64	1660	180	472600
TBC-01-06-04-r	Output_1_117	5.8463	0.624	0.087	0.074	0.0037	0.33757	13.5135	0.675676	0.0654	0.0093	0.331706	0.624592	0.087	0.0736533	0.0037	0.339261	0.0242	0.004	0.0654	0.0093	483	37	79	740	220	310	460	13	22	490	39	54	6.12245	460	22	0.624	0.087	0.074	0.0037	0.33757	Zircon	240	16	5.3	1.3	727	16	491000
TBC-01-06-06-c	Output_1_120	5.8463	0.681	0.082	0.0763	0.0064	0.571593	13.1062	1.09934	0.067	0.0083	0.560666	0.605361	0.082	0.0754897	0.0064	0.530537	0.0295	0.0054	0.067	0.0083	588	64	110	820	140	240	474	34	38	526	30	50	9.88593	469.145	38	0.605361	0.082	0.0754897	0.0064	0.530537	Zircon	1000	170	10.6	2.8	1930	240	492000
TBC-01-07-01-r	Output_1_125	27.903	0.572	0.057	0.0761	0.0032	0.388779	13.1406	0.552562	0.0543	0.0058	0.366311	0.57532	0.057	0.0761476	0.0032	0.390484	0.0229	0.0035	0.0543	0.0058	458	19	68	373	70	240	472.8	5	19	460	10	35	2.78261	473.087	19	0.57532	0.057	0.0761476	0.0032	0.390484	Zircon	1012	21	8.1	1.2	1761	56	464100
TBC-01-07-02-c	Output_1_126	29.763	0.567	0.057	0.07546	0.0031	0.378284	13.2521	0.544412	0.0551	0.0058	0.363566	0.605473	0.057	0.0757252	0.0031	0.398779	0.02238	0.0033	0.0551	0.0058	447.3	7.2	65	397	64	240	469	3.9	19	456	11	37	2.85088	470.556	19	0.605473	0.057	0.0757252	0.0031	0.398779	Zircon	340.2	9.2	4.6	0.83	952	14	467700
TBC-01-07-06-r	Output_1_131	27.903	0.57	0.056	0.07488	0.0031	0.38832	13.3547	0.552879	0.0554	0.0058	0.36773	0.640479	0.056	0.0754422	0.0031	0.425334	0.02194	0.0032	0.0554	0.0058	438.7	6.3	63	424	54	220	465.5	4.1	19	457.7	8.8	36	1.70417	465.5	19	0.57	0.056	0.07488	0.0031	0.38832	Zircon	341	6.8	3.32	0.62	1115	14	473900
TBC-01-07-10-r	Output_1_135	28.169	0.589	0.061	0.0777	0.0033	0.379424	12.87	0.546603	0.056	0.0061	0.363263	0.627053	0.061	0.0779236	0.0033	0.399149	0.02357	0.0035	0.056	0.0061	471	11	69	446	90	240	482.5	6.8	20	468	16	39	3.09829	483.717	20	0.627053	0.061	0.0779236	0.0033	0.399149	Zircon	310.1	8.4	8.5	1.1	1093	30	467400
TBC-01-07-12-r	Output_1_138	27.371	0.584	0.06	0.07469	0.0031	0.37457	13.3887	0.555695	0.0568	0.0062	0.355412	0.6153	0.06	0.0749404	0.0031	0.390525	0.02266	0.0033	0.0568	0.0062	452.9	9.4	66	497	94	250	464.3	5.4	19	465	14	38	0.150538	464.3	19	0.584	0.06	0.07469	0.0031	0.37457	Zircon	272.5	7.7	6.2	0.9	861	17	460400
TBC-01-08-03-r	Output_1_144	26.043	0.611	0.071	0.0714	0.0032	0.35985	14.0056	0.627702	0.0631	0.0076	0.348745	0.543206	0.071	0.0707636	0.0032	0.326961	0.02405	0.0036	0.0631	0.0076	480	17	71	680	140	260	444.8	8.6	19	490	26	46	9.22449	440.755	19	0.543206	0.071	0.0707636	0.0032	0.326961	Zircon	234.7	7.3	10.6	1.2	601	9.3	461000
TBC-01-08-04-c	Output_1_145	15.679	0.557	0.058	0.0723	0.0031	0.380751	13.8313	0.593041	0.0559	0.0061	0.365704	0.549296	0.058	0.0722369	0.0031	0.376517	0.02261	0.0033	0.0559	0.0061	452	6.8	65	428	88	250	449.8	6.9	19	449	14	38	0.178174	449.8	19	0.557	0.058	0.0723	0.0031	0.380751	Zircon	301	28	5.6	1.4	1930	180	459100
TBC-01-08-04-r	Output_1_146	30.295	0.574	0.056	0.07435	0.0031	0.392986	13.4499	0.560789	0.0566	0.0059	0.37138	0.608095	0.056	0.07458	0.0031	0.411395	0.02224	0.0033	0.0566	0.0059	444.6	6.3	64	463	45	230	462.3	4.6	19	460.1	6.9	36	0.478157	462.3	19	0.574	0.056	0.07435	0.0031	0.392986	Zircon	849	14	5.6	0.89	1791	33	458400
TBC-01-08-08-c	Output_1_152	27.637	0.637	0.065	0.0737	0.0033	0.401822	13.5685	0.607546	0.0637	0.007	0.377341	0.522274	0.065	0.0726796	0.0033	0.342731	0.02571	0.0038	0.0637	0.007	513	11	75	694	90	240	458.3	8.1	20	499	14	41	8.15631	452.279	20	0.522274	0.065	0.0726796	0.0033	0.342731	Zircon	321.3	8.2	7.73	0.91	1019	12	458000
TBC-01-08-10-r	Output_1_156	11.958	0.605	0.069	0.0699	0.003	0.352201	14.3062	0.613998	0.0615	0.007	0.35282	0.548431	0.069	0.0695392	0.003	0.324358	0.0283	0.0054	0.0615	0.007	564	69	110	650	110	250	436.6	6.8	19	478	24	43	8.66109	433.379	19	0.548431	0.069	0.0695392	0.003	0.324358	Zircon	1108	28	5.5	1.3	1973	43	438200
TBC-01-08-10-c	Output_1_157	27.106	0.65	0.068	0.07371	0.0031	0.373	13.5667	0.57057	0.0642	0.0071	0.355452	0.560893	0.068	0.0729633	0.0031	0.330731	0.02493	0.0037	0.0642	0.0071	498	13	73	784	99	250	458.4	5.9	19	509	17	43	9.94106	453.984	19	0.560893	0.068	0.0729633	0.0031	0.330731	Zircon	393	10	4.21	0.83	999	40	471900
Xenocryst
TBC-01-07-11-r	Output_1_137	14.35	0.694	0.071	0.082	0.0037	0.403544	12.1951	0.550268	0.0611	0.0065	0.390475	0.66012	0.071	0.0817525	0.0037	0.387851	0.0317	0.0051	0.0611	0.0065	630	42	99	632	71	230	508	10	22	534	15	42	4.86891	506.575	22	0.66012	0.071	0.0817525	0.0037	0.387851	Zircon	811	17	4.9	1.2	1172	26	443400
TBC-01-03-02-c	Output_1_71	8.1092	0.717	0.075	0.0876	0.0046	0.448649	11.4155	0.599445	0.061	0.0072	0.406477	0.653443	0.075	0.0869254	0.0046	0.4187	0.0355	0.0057	0.061	0.0072	705	46	110	610	130	260	541	17	27	548	19	45	1.27737	541	27	0.717	0.075	0.0876	0.0046	0.448649	Zircon	275	15	11.1	2.2	637	28	492000
TBC-01-01-25-c	Output_1_25	19.319	0.886	0.094	0.0957	0.0041	0.374435	10.4493	0.447672	0.0668	0.0074	0.360703	0.827912	0.094	0.0952698	0.0041	0.354433	0.03061	0.0046	0.0668	0.0074	609	19	89	830	94	230	589.2	8.6	24	645	22	49	8.65116	586.629	24	0.827912	0.094	0.0952698	0.0041	0.354433	Zircon	304	10	10	1.4	797	14	451800
TBC-01-02-07-c	Output_1_48	18.842	0.998	0.1	0.1056	0.0046	0.398689	9.4697	0.412506	0.0676	0.0071	0.383103	0.726372	0.1	0.103525	0.0046	0.307152	0.0463	0.0069	0.0676	0.0071	914	26	130	864	50	210	647	10	27	702	15	51	7.83476	647	27	0.998	0.1	0.1056	0.0046	0.398689	Zircon	262	12	5.2	1.3	667	26	451300
TBC-01-06-05-c	Output_1_118	6.9093	1.016	0.11	0.1077	0.0065	0.486901	9.28505	0.560379	0.0704	0.0076	0.487977	0.949201	0.11	0.106929	0.0065	0.464518	0.0669	0.01	0.0704	0.0076	1309	71	200	933	76	220	659	28	38	711	26	55	7.31364	654.888	38	0.949201	0.11	0.106929	0.0065	0.464518	Zircon	651	26	5	1.8	983	20	480000
TBC-01-02-16-c	Output_1_60	29.813	1.086	0.11	0.1099	0.0065	0.504249	9.09918	0.538168	0.0727	0.0074	0.502401	0.907653	0.11	0.108344	0.0065	0.443652	0.0449	0.0067	0.0727	0.0074	887	27	130	1004	29	210	671	27	38	742	23	55	9.56873	663.121	38	0.907653	0.11	0.108344	0.0065	0.443652	Zircon	310	35	9	1.3	706	71	470500
TBC-01-06-01-c	Output_1_112	7.9723	1.026	0.11	0.1148	0.0059	0.432264	8.7108	0.447681	0.0668	0.0072	0.430396	1.01789	0.11	0.114487	0.0059	0.430437	0.038	0.0058	0.0668	0.0072	755	33	110	842	78	240	700	21	34	715	27	56	2.0979	698.755	34	1.01789	0.11	0.114487	0.0059	0.430437	Zircon	312	18	3.2	1	794	32	494900
TBC-01-06-09-c	Output_1_124	29.763	1.135	0.11	0.1273	0.0054	0.400966	7.85546	0.333224	0.0645	0.0067	0.378058	1.04755	0.11	0.126629	0.0054	0.376265	0.03959	0.0058	0.0645	0.0067	784.7	8.8	110	751	51	210	772.2	9.6	31	770	15	52	0.285714	772.2	31	1.135	0.11	0.1273	0.0054	0.400966	Zircon	774	39	7.74	0.98	1930	93	467700
TBC-01-02-08-c	Output_1_50	7.1552	1.514	0.16	0.1398	0.007	0.428173	7.15308	0.358166	0.0785	0.0086	0.415689	1.86902	0.16	0.142629	0.007	0.497366	0.0353	0.0053	0.0785	0.0086	701	23	100	1152	81	220	843	23	39	934	32	67	9.74304	843	39	1.514	0.16	0.1398	0.007	0.428173	Zircon	295	22	10.1	2.6	1350	35	449000
TBC-01-03-02-c	Output_1_72	7.3937	1.423	0.15	0.1442	0.0069	0.413345	6.93481	0.331832	0.0719	0.0087	0.367742	1.34927	0.15	0.14357	0.0069	0.396816	0.0469	0.0072	0.0719	0.0087	926	45	140	960	130	240	868	21	39	897	31	65	3.233	864.816	39	1.34927	0.15	0.14357	0.0069	0.396816	Zircon	215	11	6.5	2	592	17	436800
TBC-01-02-19-c	Output_1_64	20.75	1.444	0.15	0.1467	0.0071	0.422324	6.81663	0.329912	0.0724	0.0077	0.414197	1.48779	0.15	0.14689	0.0071	0.432306	0.0439	0.0065	0.0724	0.0077	869	25	130	993	63	230	882	22	40	903	27	63	2.32558	882	40	1.444	0.15	0.1467	0.0071	0.422324	Zircon	264	11	4.09	0.93	845	20	469500
TBC-01-06-01-c	Output_1_113	16.742	1.463	0.15	0.1516	0.0064	0.380738	6.59631	0.278472	0.0697	0.0073	0.373852	1.40801	0.15	0.151219	0.0064	0.369204	0.0481	0.0071	0.0697	0.0073	950	19	140	920	49	210	910	9.6	36	913	18	61	0.328587	910	36	1.463	0.15	0.1516	0.0064	0.380738	Zircon	184	11	4.4	1.1	859	17	467700
TBC-01-01-26-c	Output_1_26	30.29	1.56	0.15	0.1518	0.0063	0.396283	6.58762	0.273399	0.0742	0.0076	0.375534	1.58309	0.15	0.152043	0.0063	0.400674	0.04562	0.0067	0.0742	0.0076	902	11	130	1045	34	210	911.1	7.7	35	953.6	9.9	60	4.4568	911.1	35	1.56	0.15	0.1518	0.0063	0.396283	Zircon	549	15	23.5	2.6	6070	250	459800
TBC-01-06-06-c	Output_1_121	20.462	1.533	0.15	0.1559	0.0066	0.397089	6.41437	0.271551	0.0713	0.0073	0.382112	1.55819	0.15	0.156107	0.0066	0.402116	0.04679	0.0069	0.0713	0.0073	924	14	130	961	36	210	934	11	37	945	15	62	1.16402	934	37	1.533	0.15	0.1559	0.0066	0.397089	Zircon	336	10	10.9	1.4	2033	37	444600
TBC-01-06-05-c	Output_1_119	17.539	1.666	0.17	0.1639	0.0072	0.39542	6.10128	0.268025	0.074	0.0077	0.388937	1.66724	0.17	0.163866	0.0072	0.395737	0.0502	0.0076	0.074	0.0077	990	39	150	1036	40	210	978	16	40	997	18	65	1.90572	978.227	40	1.66724	0.17	0.163866	0.0072	0.395737	Zircon	917	20	8.7	1.5	1534	27	450000
TBC-01-07-07-c	Output_1_132	28.169	2.018	0.2	0.1953	0.008	0.381973	5.12033	0.209742	0.0758	0.0079	0.365795	2.083	0.2	0.195631	0.008	0.391845	0.05707	0.0084	0.0758	0.0079	1124	18	160	1085	48	210	1150	8.8	43	1122	16	68	2.49554	1085	210	2.083	0.2	0.195631	0.008	0.391845	Zircon	193.8	7.4	10.5	1.1	512.8	6.1	482200
TBC-01-07-08-c	Output_1_133	28.7	2.067	0.21	0.1964	0.0082	0.380109	5.09165	0.212584	0.0774	0.0082	0.366649	2.18388	0.21	0.197086	0.0082	0.397102	0.0574	0.0084	0.0774	0.0082	1128	20	160	1120	61	210	1156	12	44	1140	21	69	1.40351	1120	210	2.067	0.21	0.1964	0.0082	0.380109	Zircon	286.6	8.4	22.9	1.9	583.2	9.8	472300
TBC-01-06-07-c	Output_1_122	30.826	2.096	0.2	0.1981	0.0081	0.393872	5.04796	0.206403	0.0776	0.0079	0.372701	2.19752	0.2	0.198709	0.0081	0.408762	0.05742	0.0084	0.0776	0.0079	1128	13	160	1135	25	200	1166	7.5	45	1146.9	9.2	66	1.66536	1135	200	2.19752	0.2	0.198709	0.0081	0.408762	Zircon	303.2	7.6	9.88	0.93	974	23	465000
TBC-01-03-10-c	Output_1_86	31.244	2.121	0.21	0.1965	0.0081	0.384355	5.08906	0.209778	0.0784	0.0081	0.370576	2.17913	0.21	0.196932	0.0081	0.392548	0.0575	0.0084	0.0784	0.0081	1130	13	160	1155	35	200	1156	10	44	1154	12	67	0.17331	1155	200	2.121	0.21	0.1965	0.0081	0.384355	Zircon	261	13	13.1	1.5	606	17	474000
TBC-01-03-12-c	Output_1_88	29.336	2	0.2	0.1819	0.0078	0.394102	5.49753	0.235738	0.0802	0.0082	0.386758	2.10242	0.2	0.182615	0.0078	0.409607	0.05215	0.0076	0.0802	0.0082	1027	14	150	1202	26	210	1077	14	42	1114	14	66	3.32136	1202	210	2	0.2	0.1819	0.0078	0.394102	Zircon	376	14	7.8	1.1	1260	19	462500
TBC-01-03-11-c	Output_1_87	29.813	1.955	0.19	0.1753	0.0073	0.393851	5.70451	0.237552	0.0812	0.0083	0.377289	2.04222	0.19	0.175928	0.0073	0.407326	0.04942	0.0072	0.0812	0.0083	975	16	140	1225	32	210	1041	10	40	1102	11	68	5.53539	1225	210	1.955	0.19	0.1753	0.0073	0.393851	Zircon	266	15	6.86	0.95	389	33	469700
TBC-01-04-01-c	Output_1_90	26.236	2.8	0.28	0.2302	0.01	0.398435	4.34405	0.188708	0.089	0.0091	0.39103	2.79918	0.28	0.230014	0.01	0.398607	0.0692	0.01	0.089	0.0091	1353	22	190	1401	25	200	1335	22	54	1355	19	75	1.47601	1401	200	2.8	0.28	0.2302	0.01	0.398435	Zircon	249	17	10.4	1.3	763	11	466000
TBC-01-02-22-c	Output_1_68	30.529	3.294	0.33	0.254	0.011	0.396796	3.93701	0.1705	0.0937	0.0098	0.382569	3.51265	0.33	0.25575	0.011	0.416272	0.0719	0.011	0.0937	0.0098	1402	23	200	1491	46	190	1459	17	55	1478	24	80	1.28552	1491	190	3.294	0.33	0.254	0.011	0.396796	Zircon	200.5	6.7	6.51	0.99	515.9	9.8	465500
TBC-01-07-04-c	Output_1_129	28.169	3.33	0.33	0.2387	0.011	0.421658	4.18936	0.193058	0.1018	0.011	0.392291	2.62213	0.33	0.233194	0.011	0.350971	0.0842	0.012	0.1018	0.011	1633	43	230	1658	56	200	1379	24	55	1485	23	78	7.13805	1658	200	2.62213	0.33	0.233194	0.011	0.350971	Zircon	432.2	8.8	13.2	1.3	1035	24	468700
TBC-01-07-09-c	Output_1_134	27.903	4.56	0.46	0.3161	0.014	0.402007	3.16356	0.140113	0.1061	0.012	0.364634	4.73049	0.46	0.316892	0.014	0.413636	0.0899	0.013	0.1061	0.012	1739	44	250	1726	74	210	1770	29	69	1748	29	88	1.25858	1726	210	4.73049	0.46	0.316892	0.014	0.413636	Zircon	425	13	29.8	1.9	611	39	480900
TBC-01-03-04-c	Output_1_77	12.641	11.53	1.1	0.4602	0.019	0.397162	2.17297	0.089714	0.1792	0.018	0.380168	11.0328	1.1	0.457917	0.019	0.384217	0.1363	0.02	0.1792	0.018	2582	33	350	2645	14	170	2440	21	84	2570	10	110	5.05837	2645	170	11.0328	1.1	0.457917	0.019	0.384217	Zircon	258	14	7.6	2	1362	86	452300
Pb loss
TBC-01-08-06-rx	Output_1_149	29.232	0.0418	0.0052	0.00464	0.00025	0.397432	215.517	11.6119	0.0664	0.0085	0.387932	0.0334942	0.0052	0.00456428	0.00025	0.332706	0.00395	0.00085	0.0664	0.0085	80	12	17	690	120	190	29.9	1.1	1.6	41.5	3.3	5.1	27.9518	29.3563	1.6	0.0334942	0.0052	0.00456428	0.00025	0.332706	Inclusion
TBC-01-01-24-rx	Output_1_23	13.118	0.1686	0.017	0.0191	0.0014	0.588	52.356	3.83761	0.0664	0.0071	0.565405	0.140723	0.017	0.0188142	0.0014	0.524456	0.01919	0.0028	0.0664	0.0071	384.3	9.1	56	807	69	220	121.6	7.4	8.9	158.1	5.7	15	23.0867	120.158	8.9	0.140723	0.017	0.0188142	0.0014	0.524456	Inclusion
TBC-01-05-03-rx	Output_1_108	14.882	0.1978	0.021	0.02107	0.00094	0.3874	47.4608	2.11738	0.0684	0.0073	0.385679	0.156279	0.021	0.0207151	0.00094	0.319944	0.0241	0.004	0.0684	0.0073	490	39	84	879	68	210	134.4	2.6	6	184.8	8.6	19	27.2727	132.174	6	0.156279	0.021	0.0207151	0.00094	0.319944	Inclusion
TBC-01-05-03-rx	Output_1_107	7.9723	0.279	0.03	0.0305	0.0017	0.460207	32.7869	1.82747	0.0684	0.0071	0.473078	0.224797	0.03	0.0299766	0.0017	0.3911	0.0409	0.0073	0.0684	0.0071	809	82	140	878	44	210	193.6	7.5	11	250	11	24	22.56	190.402	11	0.224797	0.03	0.0299766	0.0017	0.3911	Inclusion
TBC-01-01-22-c	Output_1_19	6.2011	0.2545	0.026	0.0327	0.0016	0.431958	30.581	1.49632	0.057	0.0062	0.410241	0.227385	0.026	0.0324541	0.0016	0.395927	0.0171	0.0028	0.057	0.0062	342	24	55	506	88	260	207.4	5.3	9.8	230.1	7.7	21	9.86528	205.889	9.8	0.227385	0.026	0.0324541	0.0016	0.395927	Inclusion
TBC-01-02-12-r	Output_1_55	13.595	0.268	0.027	0.03428	0.0016	0.420366	29.1715	1.36156	0.0576	0.006	0.408903	0.25715	0.027	0.0341552	0.0016	0.407443	0.0263	0.0043	0.0576	0.006	523	41	86	508	45	230	217.2	5.4	10	240.8	7.7	22	9.80066	216.502	10	0.25715	0.027	0.0341552	0.0016	0.407443	Inclusion
TBC-01-03-07-c	Output_1_80	5.9626	0.284	0.03	0.0356	0.0023	0.52176	28.0899	1.8148	0.0591	0.007	0.478859	0.25313	0.03	0.0352933	0.0023	0.481829	0.0239	0.0039	0.0591	0.007	477	35	77	550	130	250	225	11	14	254	10	24	11.4173	223.593	14	0.25313	0.03	0.0352933	0.0023	0.481829	Zircon	1483	73	4.5	1.9	2756	74	493500
TBC-01-04-01-r	Output_1_91	6.9167	0.333	0.034	0.03927	0.0017	0.390351	25.4647	1.10237	0.063	0.0067	0.377017	0.300682	0.034	0.0389352	0.0017	0.360211	0.0343	0.0059	0.063	0.0067	681	60	110	704	63	230	248.3	4	11	291.7	8.7	26	14.8783	246.229	11	0.300682	0.034	0.0389352	0.0017	0.360211	Inclusion
TBC-01-03-02-r	Output_1_73	27.428	0.3268	0.033	0.0393	0.002	0.450048	25.4453	1.29493	0.0598	0.0062	0.440629	0.288379	0.033	0.0390048	0.002	0.408912	0.0287	0.0044	0.0598	0.0062	571	25	86	584	46	220	248.3	7.8	13	286.6	7.5	25	13.3636	246.662	13	0.288379	0.033	0.0390048	0.002	0.408912	Zircon	1236	43	19.2	4.4	2220	100	480700
TBC-01-07-11-r	Output_1_136	5.0491	0.408	0.047	0.043	0.0035	0.577064	23.2558	1.89291	0.0696	0.0087	0.545673	0.343777	0.047	0.0424301	0.0035	0.516607	0.02499	0.0037	0.0696	0.0087	499	9.4	72	900	150	260	271	19	22	347	19	34	21.902	267.878	22	0.343777	0.047	0.0424301	0.0035	0.516607	Zircon	1074	59	19.3	5.7	2310	210	478900
TBC-01-02-01-r	Output_1_40	9.0632	0.415	0.048	0.0516	0.0029	0.437046	19.3798	1.08918	0.0571	0.0065	0.442695	0.395134	0.048	0.0515097	0.0029	0.420495	0.0177	0.0028	0.0571	0.0065	355	20	55	480	110	250	324	13	18	351	19	34	7.69231	323.784	18	0.395134	0.048	0.0515097	0.0029	0.420495	Inclusion
TBC-01-01-27-c	Output_1_27	9.5402	0.456	0.045	0.0552	0.0026	0.430746	18.1159	0.853287	0.0604	0.0063	0.411559	0.453465	0.045	0.0551502	0.0026	0.429108	0.01815	0.0028	0.0604	0.0063	364	17	55	614	54	220	346.4	7.6	16	381.6	8.6	32	9.22432	346.064	16	0.453465	0.045	0.0551502	0.0026	0.429108	Zircon	780	23	6.8	1.4	1553	33	487000
TBC-01-01-29-c	Output_1_32	9.0632	0.501	0.052	0.0607	0.0031	0.441496	16.4745	0.841365	0.06	0.0063	0.437395	0.428197	0.052	0.0600932	0.0031	0.390979	0.0363	0.0056	0.06	0.0063	721	34	110	598	63	230	380	11	19	415	13	32	8.43373	376.192	19	0.428197	0.052	0.0600932	0.0031	0.390979	Zircon	1287	31	4.9	1.7	1737	27	442600
TBC-01-04-04-c	Output_1_96	16.218	0.468	0.047	0.06177	0.0027	0.399083	16.1891	0.707634	0.0553	0.006	0.373681	0.503081	0.047	0.0620358	0.0027	0.42229	0.01813	0.0027	0.0553	0.006	363.2	7.9	53	409	81	240	386.4	5.9	16	391	9.9	31	1.17647	386.4	16	0.468	0.047	0.06177	0.0027	0.399083	Zircon	841	40	8.9	1.3	2416	89	481900
TBC-01-08-01-c	Output_1_139	15.679	0.665	0.072	0.0634	0.0028	0.377691	15.7729	0.696594	0.0752	0.0086	0.360249	0.505612	0.072	0.0621551	0.0028	0.301616	0.02162	0.0032	0.0752	0.0086	432.3	8.3	63	1060	110	230	396.1	7.2	17	516	21	44	23.2364	388.718	17	0.505612	0.072	0.0621551	0.0028	0.301616	Zircon	447	17	7.7	1.2	2160	120	467300
TBC-01-03-01-r	Output_1_70	27.667	0.459	0.046	0.06242	0.0026	0.383798	16.0205	0.667307	0.054	0.0057	0.367065	0.497643	0.046	0.0626922	0.0026	0.40935	0.01763	0.0026	0.054	0.0057	353	12	52	363	59	240	390.3	3.8	16	384.4	9.3	32	1.53486	390.3	16	0.459	0.046	0.06242	0.0026	0.383798	Zircon	957	38	5.58	0.94	1814	42	453800
TBC-01-08-02-r	Output_1_142	27.903	0.563	0.056	0.0631	0.0039	0.527785	15.8479	0.979503	0.0669	0.0074	0.487783	0.549271	0.056	0.0628327	0.0039	0.520015	0.02082	0.0031	0.0669	0.0074	416	13	61	805	88	220	394	18	24	452	11	37	12.8319	392.83	24	0.549271	0.056	0.0628327	0.0039	0.520015	Zircon	408	12	4.73	0.87	1224	59	458200
TBC-01-01-29-c	Output_1_31	2.8621	0.542	0.069	0.064	0.005	0.523042	15.625	1.2207	0.0614	0.0064	0.59975	0.445153	0.069	0.0632077	0.005	0.454567	0.0482	0.0081	0.0614	0.0064	951	78	160	652	58	230	400	26	30	439	30	45	8.88383	395.104	30	0.445153	0.069	0.0632077	0.005	0.454567	Zircon	1414	46	4.6	2.7	2010	100	459300
TBC-01-02-10-r	Output_1_52	7.8707	0.547	0.06	0.0633	0.003	0.39663	15.7978	0.74871	0.0641	0.0073	0.384211	0.62904	0.06	0.0638741	0.003	0.441756	0.01729	0.0027	0.0641	0.0073	346	18	53	730	110	240	395.7	9.4	18	442	19	39	10.4751	395.7	18	0.547	0.06	0.0633	0.003	0.39663	Zircon	1293	25	33.5	5.9	2670	68	477000
TBC-01-02-20-c	Output_1_65	26.713	0.551	0.055	0.06681	0.0028	0.387123	14.9678	0.6273	0.0601	0.0064	0.366219	0.56336	0.055	0.0668919	0.0028	0.394061	0.02046	0.003	0.0601	0.0064	409.4	8.1	60	596	62	220	416.9	4.8	17	447	11	37	6.73378	416.9	17	0.551	0.055	0.06681	0.0028	0.387123	Zircon	1790	100	15.8	1.4	3470	160	449100
Discordant
TBC-01-01-03-cx	Output_1_3	20.511	8.45	0.81	0.2804	0.012	0.407669	3.56633	0.152625	0.2162	0.022	0.387677	7.50184	0.81	0.274061	0.012	0.375799	0.1512	0.022	0.2162	0.022	2844	74	390	2951	16	160	1593	19	60	2282	12	84	30.1928								Zircon	510	13	4.94	0.85	1012	42	422200
TBC-01-01-03-rx	Output_1_4	28.382	0.183	0.022	0.00897	0.0005	0.420649	111.483	6.2142	0.158	0.023	0.357599	0.0836847	0.022	0.0080291	0.0005	0.230501	0.01842	0.0027	0.158	0.023	369	8.3	54	2250	190	260	57.6	2.2	3.2	171	11	19	66.3158								Inclusion
TBC-01-01-04-c	Output_1_5	28.382	2.89	0.29	0.1625	0.0076	0.422448	6.15385	0.287811	0.1264	0.013	0.41395	2.66456	0.29	0.161195	0.0076	0.397505	0.0573	0.0085	0.1264	0.013	1125	30	160	2052	28	190	970	21	42	1374	26	77	29.4032								Zircon	313.8	8.4	6.31	0.84	818	15	437800
TBC-01-01-05-c	Output_1_6	10.733	0.771	0.1	0.0275	0.0015	0.38766	36.3636	1.98347	0.198	0.026	0.383606	0.130885	0.1	0.0223228	0.0015	0.087611	0.0689	0.012	0.198	0.026	1340	120	220	2790	140	220	175.1	6.7	9.7	575	39	57	69.5478								Zircon	1429	40	24.7	3.9	3150	130	427300
TBC-01-01-05-r	Output_1_7	16.457	0.255	0.029	0.00558	0.00031	0.438932	179.212	9.95619	0.335	0.036	0.459236	0.0145135	0.029	0.00352785	0.00031	0.0439344	0.0161	0.0029	0.335	0.036	322	33	57	3629	61	170	35.8	1.3	2	230	13	23	84.4348								Inclusion
TBC-01-01-06-c	Output_1_8	15.503	1.551	0.16	0.1111	0.006	0.463802	9.0009	0.486097	0.0997	0.01	0.474081	1.16662	0.16	0.108206	0.006	0.374829	0.0495	0.0073	0.0997	0.01	976	24	140	1628	44	200	679	23	35	952	24	62	28.6765								Zircon	781	46	16	1.9	1532	88	398800
TBC-01-01-06-r	Output_1_9	30.29	0.265	0.029	0.00749	0.00044	0.47297	133.511	7.84312	0.2597	0.028	0.47845	0.0283765	0.029	0.00546841	0.00044	0.0784895	0.0637	0.011	0.2597	0.028	1240	120	210	3235	48	170	48.1	2.1	2.8	238	11	23	79.7899								Inclusion
TBC-01-01-07-c	Output_1_10	11.925	0.634	0.063	0.0572	0.0031	0.478815	17.4825	0.947479	0.0782	0.0083	0.454761	0.430413	0.063	0.0556664	0.0031	0.355597	0.02221	0.0033	0.0782	0.0083	444	8.5	65	1155	62	200	359	12	19	498	11	39	27.9116								Zircon	696	58	16.6	2.4	2682	49	397800
TBC-01-01-07-r	Output_1_11	31.244	0.537	0.064	0.0199	0.0021	0.662921	50.2513	5.3029	0.2016	0.022	0.695152	0.179094	0.064	0.0167653	0.0021	0.330786	0.0258	0.0039	0.2016	0.022	514	21	77	2820	66	180	127	12	13	433	26	43	70.6697								Inclusion
TBC-01-01-09-c	Output_1_13	28.859	2.91	0.44	0.106	0.015	0.683316	9.43396	1.33499	0.2085	0.022	0.801673	2.28948	0.44	0.0998992	0.015	0.615664	0.1404	0.022	0.2085	0.022	2650	160	390	2887	49	180	639	83	87	1317	88	110	51.4806								Zircon	834	42	30.6	5.2	3600	620	443800
TBC-01-01-09-r	Output_1_14	16.695	0.625	0.062	0.0304	0.0018	0.512525	32.8947	1.94772	0.1525	0.017	0.469089	0.323956	0.062	0.0277714	0.0018	0.320768	0.0248	0.0036	0.1525	0.017	495	10	72	2349	86	200	193	8.2	11	494	11	40	60.9312								Zircon	802	26	21.7	3.1	3220	140	479400
TBC-01-01-09-r	Output_1_15	5.7241	0.716	0.08	0.01806	0.0012	0.511132	55.371	3.67914	0.288	0.033	0.501644	0.176346	0.08	0.0135237	0.0012	0.191959	0.0251	0.004	0.288	0.033	500	31	79	3400	81	180	115.4	6.3	7.8	547	24	47	78.9031								Zircon	1117	72	76	12	6060	430	414200
TBC-01-01-10-c	Output_1_16	25.043	0.566	0.06	0.02128	0.0013	0.499307	46.9925	2.87078	0.1974	0.021	0.497981	0.264971	0.06	0.0186488	0.0013	0.294223	0.02014	0.0031	0.1974	0.021	403	17	61	2786	62	190	135.7	5.9	8	461	17	39	70.564								Zircon	813	37	25.2	2.5	3130	210	440100
TBC-01-01-21-r	Output_1_17	5.4856	0.163	0.025	0.00494	0.00046	0.518967	202.429	18.8497	0.239	0.034	0.547668	0.0319429	0.025	0.00383579	0.00046	0.15146	0.0098	0.0025	0.239	0.034	196	41	50	3090	150	210	31.7	2.7	3	159	20	25	80.0629								Inclusion
TBC-01-01-21-r	Output_1_18	15.503	0.1246	0.014	0.01308	0.00081	0.48269	76.4526	4.73445	0.0678	0.0071	0.509014	0.0422388	0.014	0.0124072	0.00081	0.193255	0.01228	0.0018	0.0678	0.0071	246.7	7.8	37	858	46	220	83.7	3.9	5.2	119.1	6.6	13	29.7229								Inclusion
TBC-01-01-23-c	Output_1_21	16.218	0.684	0.072	0.074	0.0034	0.400039	13.5135	0.620891	0.0665	0.007	0.400039	0.701555	0.072	0.074191	0.0034	0.407733	0.02086	0.0031	0.0665	0.007	417	13	61	814	58	220	460.4	9.7	20	528	18	43	12.803								Zircon	664	16	5.9	1.1	1290	21	461800
TBC-01-01-23-c	Output_1_22	8.3477	0.819	0.092	0.0859	0.0043	0.40704	11.6414	0.58275	0.0686	0.0077	0.407304	0.848602	0.092	0.0861967	0.0043	0.418014	0.02432	0.0037	0.0686	0.0077	486	18	72	900	100	250	531	15	25	612	29	54	13.2353								Zircon	713	33	4.9	2	1305	34	439000
TBC-01-01-24-rx	Output_1_24	4.5316	0.668	0.081	0.0516	0.0032	0.455341	19.3798	1.20185	0.0899	0.0095	0.50614	0.307358	0.081	0.0488567	0.0032	0.241196	0.0361	0.0054	0.0899	0.0095	717	27	110	1420	58	200	325	15	20	519	30	49	37.3796								Zircon	749	61	9.2	3.6	1555	56	427000
TBC-01-01-28-c	Output_1_28	15.503	1.099	0.12	0.0826	0.0035	0.361779	12.1065	0.512989	0.0976	0.012	0.325826	0.989609	0.12	0.0816106	0.0035	0.333435	0.034	0.0061	0.0976	0.012	675	70	120	1548	99	190	511.6	6.8	21	750	27	55	31.7867								Inclusion
TBC-01-01-28-c	Output_1_29	4.2931	0.646	0.067	0.0539	0.0028	0.447837	18.5529	0.963786	0.0847	0.009	0.43921	0.575921	0.067	0.0534603	0.0028	0.410524	0.02005	0.003	0.0847	0.009	401	14	59	1307	58	210	338	11	17	506	16	41	33.2016								Inclusion
TBC-01-01-29-c	Output_1_30	11.21	0.306	0.031	0.0328	0.0018	0.476305	30.4878	1.67311	0.0693	0.0073	0.462027	0.222016	0.031	0.0320393	0.0018	0.373275	0.0403	0.0061	0.0693	0.0073	799	34	120	913	53	200	208.1	7.8	11	270.6	8.3	24	23.0968								Zircon	1233	43	8.9	1.6	2200	72	487700
TBC-01-01-30-c	Output_1_33	27.905	1.153	0.12	0.1105	0.0053	0.418544	9.04977	0.434061	0.0755	0.0079	0.416696	0.857974	0.12	0.108153	0.0053	0.330663	0.04809	0.0071	0.0755	0.0079	949	17	140	1075	50	210	675	16	31	776	18	55	13.0155								Zircon	533	16	10.45	0.98	1039	27	464500
TBC-01-01-30-r	Output_1_34	22.181	0.304	0.03	0.03533	0.0016	0.417089	28.3046	1.28184	0.0633	0.0065	0.403527	0.294122	0.03	0.0352127	0.0016	0.406928	0.0144	0.0023	0.0633	0.0065	289	20	46	726	35	220	223.8	4.8	10	269.4	4.9	23	16.9265								Inclusion
TBC-01-01-30-r	Output_1_35	5.2471	1.34	0.17	0.0441	0.0028	0.447548	22.6757	1.43973	0.2188	0.023	0.517013	0.583581	0.17	0.0379114	0.0028	0.245761	0.0301	0.007	0.2188	0.023	600	110	140	2969	50	170	278	14	17	861	47	72	67.712								Inclusion
TBC-01-01-31-c	Output_1_36	2.6236	0.73	0.13	0.0301	0.0041	0.607541	33.2226	4.52534	0.1815	0.019	0.792893	0.216113	0.13	0.0256194	0.0041	0.2571	0.172	0.027	0.1815	0.019	3200	190	470	2665	58	180	191	25	26	555	62	75	65.5856								Inclusion
TBC-01-01-31-c	Output_1_37	14.072	3.85	0.39	0.11	0.0051	0.416173	9.09091	0.421488	0.2529	0.027	0.398333	0.392787	0.39	0.0823215	0.0051	0.0622738	0.1927	0.029	0.2529	0.027	3560	120	490	3197	43	160	673	14	29	1599	30	82	57.9112								Zircon	1465	32	9.4	1.4	3297	59	453100
TBC-01-01-31-c	Output_1_38	2.3851	13.7	1.3	0.1923	0.0087	0.430367	5.20021	0.235267	0.5056	0.052	0.402654		1.3	0.0855303	0.0087		0.795	0.12	0.5056	0.052	11820	360	1300	4257	21	150	1134	21	47	2729	16	92	58.4463								Zircon	1912	69	47	18	2890	120	424000
TBC-01-02-01-r	Output_1_39	9.5402	0.1083	0.012	0.0123	0.0012	0.660834	81.3008	7.93179	0.0653	0.0072	0.662661	0.102582	0.012	0.0122317	0.0012	0.642587	0.00531	0.00082	0.0653	0.0072	107.1	5.7	17	772	84	220	79	6.9	7.6	104.3	6.3	11	24.257								Inclusion
TBC-01-02-03-c	Output_1_42	29.813	2.37	0.26	0.1716	0.0097	0.458035	5.82751	0.32941	0.1008	0.01	0.495065	2.2695	0.26	0.170706	0.0097	0.444343	0.0543	0.0086	0.1008	0.01	1066	68	170	1632	34	200	1019	37	54	1236	40	78	17.5566								Zircon	578	23	8.3	1.1	1520	100	465400
TBC-01-02-04-r	Output_1_43	25.52	0.823	0.085	0.0717	0.004	0.475257	13.947	0.778075	0.0863	0.01	0.433793	0.59442	0.085	0.0695846	0.004	0.372987	0.0471	0.0073	0.0863	0.01	929	50	140	1330	110	230	446	17	24	608	17	46	26.6447								Zircon	296	13	5.3	1.2	745	38	462700
TBC-01-02-05-r	Output_1_45	14.787	0.355	0.038	0.0211	0.0013	0.498849	47.3934	2.91997	0.1175	0.013	0.486522	0.090577	0.038	0.0189954	0.0013	0.161	0.01648	0.0025	0.1175	0.013	330	15	50	1981	99	230	134.6	6.1	8.1	307	13	28	56.1564								Zircon	377	16	18.2	2.3	1165	56	473600
TBC-01-02-06-c	Output_1_46	27.667	0.931	0.091	0.0929	0.0039	0.394635	10.7643	0.45189	0.0725	0.0075	0.376029	0.413978	0.091	0.0887305	0.0039	0.196072	0.0474	0.0071	0.0725	0.0075	936	32	140	1014	33	210	572.6	5.8	23	670.6	9	48	14.6138								Zircon	750	25	20.4	2.3	2207	90	445100
TBC-01-02-06-r	Output_1_47	28.382	0.228	0.024	0.0213	0.0013	0.501597	46.9484	2.86539	0.0799	0.0086	0.493257	0.179713	0.024	0.0208405	0.0013	0.423203	0.0175	0.0032	0.0799	0.0086	350	40	64	1178	68	210	136	6.5	8.4	207.8	9	20	34.5525								Inclusion
TBC-01-02-09-c	Output_1_51	30.29	2.48	0.6	0.1121	0.0072	0.256589	8.92061	0.572956	0.141	0.024	0.353043	0.806421	0.6	0.101075	0.0072	0.0953057	0.295	0.087	0.141	0.024	4900	1100	1200	2160	230	290	684	32	41	1130	120	130	39.469								Zircon	384.3	9.1	9.2	1	713.8	9.6	459700
TBC-01-02-11-c	Output_1_53	30.529	0.941	0.099	0.0795	0.0041	0.440158	12.5786	0.648709	0.0866	0.0092	0.436713	0.757084	0.099	0.0779356	0.0041	0.373234	0.0377	0.006	0.0866	0.0092	746	47	120	1332	57	190	493	15	24	674	22	53	26.8546								Zircon	500	30	6.68	0.96	1123	57	451800
TBC-01-02-13-c	Output_1_56	26.951	1.201	0.12	0.0608	0.0042	0.568686	16.4474	1.13617	0.1454	0.016	0.531676	0.729224	0.12	0.0567747	0.0042	0.410021	0.0266	0.0041	0.1454	0.016	530	24	80	2286	68	190	380	21	25	800	22	57	52.5								Zircon	511	28	14.1	1.4	1661	75	441000
TBC-01-02-14-r	Output_1_57	26.951	0.1074	0.011	0.01152	0.00064	0.476798	86.8056	4.82253	0.0669	0.007	0.46895	0.0897349	0.011	0.0113813	0.00064	0.416953	0.00774	0.0012	0.0669	0.007	156	10	25	837	52	220	73.8	2.8	4.1	103.5	3.7	10	28.6957								Inclusion
TBC-01-02-15-c	Output_1_58	31.006	0.815	0.084	0.0722	0.0037	0.445216	13.8504	0.709786	0.0842	0.0088	0.440259	0.71758	0.084	0.0712156	0.0037	0.40567	0.0318	0.0049	0.0842	0.0088	632	33	96	1308	52	210	449	14	22	605	18	49	25.7851								Zircon	476	17	13.6	1.3	1381	67	439900
TBC-01-02-15-r	Output_1_59	25.282	0.1859	0.019	0.01221	0.00055	0.403298	81.9001	3.68919	0.1121	0.012	0.387856	0.0986033	0.019	0.0114523	0.00055	0.241836	0.0186	0.003	0.1121	0.012	373	23	58	1819	72	200	78.2	1.6	3.5	172.9	6	16	54.7715								Inclusion
TBC-01-02-18-c	Output_1_62	5.9626	7.2	0.73	0.1438	0.0063	0.396659	6.9541	0.304665	0.3686	0.038	0.391113	0.616471	0.73	0.0908408	0.0063	0.0584663	0.942	0.15	0.3686	0.038	13390	540	1500	3785	31	160	866	14	36	2144	32	98	59.6082								Zircon	1790	55	8.2	2.5	3410	130	480000
TBC-01-02-18-c	Output_1_63	13.595	1.86	0.29	0.0953	0.0046	0.295737	10.4932	0.506491	0.138	0.02	0.315989	0.381524	0.29	0.0837112	0.0046	0.0721052	0.109	0.027	0.138	0.02	2060	400	490	2110	190	260	587	15	27	1041	80	100	43.6119								Zircon	671	78	5.4	1.3	1360	110	449500
TBC-01-02-21-r	Output_1_66	5.0086	0.506	0.05	0.00647	0.00034	0.46954	154.56	8.12214	0.585	0.066	0.42223	0.0272583	0.05	0.00229858	0.00034	0.0803787	0.01874	0.0028	0.585	0.066	375	13	56	4466	70	170	41.6	1.4	2.2	418.3	7.6	29	90.055								Inclusion
TBC-01-02-21-r	Output_1_67	12.164	0.72	0.078	0.01432	0.00098	0.534075	69.8324	4.77903	0.3618	0.037	0.556152	0.00898826	0.078	0.0083924	0.00098	0.0134549	0.0255	0.004	0.3618	0.037	508	28	78	3755	30	160	91.7	5	6.2	554	20	43	83.4477								Zircon	795	42	36.1	4.5	4240	300	449200
TBC-01-02-22-r	Output_1_69	19.319	0.419	0.043	0.03655	0.0017	0.412801	27.3598	1.27255	0.084	0.009	0.398206	0.282901	0.043	0.035383	0.0017	0.301398	0.02881	0.0042	0.084	0.009	574	13	83	1287	69	210	231.4	4.7	10	355	11	30	34.8169								Zircon	925	27	31.7	3	2303	83	464800
TBC-01-03-03-r	Output_1_74	5.4856	0.298	0.033	0.02523	0.0011	0.366341	39.6354	1.72806	0.0876	0.011	0.327998	0.194186	0.033	0.0243064	0.0011	0.257335	0.0608	0.0098	0.0876	0.011	1193	80	190	1390	130	220	160.6	3.2	7.2	265	13	26	39.3962								Inclusion
TBC-01-03-03-r	Output_1_75	9.3017	0.68	0.07	0.0529	0.0034	0.529608	18.9036	1.21498	0.0926	0.011	0.475867	0.38013	0.07	0.0504636	0.0034	0.343601	0.0946	0.016	0.0926	0.011	1820	140	290	1480	120	220	332	16	21	526	16	42	36.8821								Zircon	995	53	11.8	3	1612	95	444100
TBC-01-03-07-r	Output_1_82	15.741	0.2214	0.022	0.0072	0.00039	0.478621	138.889	7.52315	0.223	0.025	0.435047	0.064531	0.022	0.00587783	0.00039	0.191038	0.01181	0.0018	0.223	0.025	237.3	7.9	35	3012	66	160	46.3	1.7	2.5	202.9	4.8	18	77.1809								Inclusion
TBC-01-03-07-r	Output_1_83	8.3477	0.321	0.035	0.01412	0.00074	0.433211	70.8215	3.71161	0.166	0.021	0.38273	0.142486	0.035	0.0126019	0.00074	0.232504	0.01214	0.0018	0.166	0.021	244	7	36	2490	130	210	90.4	3	4.7	282	14	27	67.9433								Inclusion
TBC-01-03-12-r	Output_1_89	15.741	0.64	0.064	0.0675	0.0029	0.394741	14.8148	0.636488	0.0688	0.0073	0.375312	0.686607	0.064	0.0678821	0.0029	0.416646	0.01844	0.0028	0.0688	0.0073	369	16	56	880	63	220	421.3	6.5	18	502	11	39	16.0757								Zircon	1337	31	8	1.5	2698	44	475500
TBC-01-04-01-r	Output_1_92	15.741	0.644	0.093	0.041	0.0025	0.388986	24.3902	1.48721	0.1117	0.015	0.41344	0.275127	0.093	0.0380432	0.0025	0.190835	0.143	0.029	0.1117	0.015	2670	350	500	1760	140	230	259	12	16	497	42	56	47.8873								Inclusion
TBC-01-04-03-c	Output_1_94	40.069	1.228	0.12	0.1024	0.0047	0.425134	9.76562	0.448227	0.087	0.0093	0.394541	0.798738	0.12	0.0989371	0.0047	0.301487	0.04341	0.0064	0.087	0.0093	859	17	120	1331	71	220	630	13	28	811	15	56	22.3181								Zircon	301.2	7.1	6.81	0.9	810	34	458800
TBC-01-04-03-r	Output_1_95	29.336	0.0739	0.0079	0.00634	0.00033	0.437768	157.729	8.20985	0.0851	0.0092	0.433805	0.0432903	0.0079	0.00607785	0.00033	0.285173	0.0166	0.0029	0.0851	0.0092	332	31	57	1306	74	210	40.8	1.4	2.1	72.3	3.4	7.4	43.5685								Inclusion
TBC-01-04-05-r	Output_1_97	8.8247	0.232	0.032	0.00986	0.00048	0.33282	101.42	4.93728	0.187	0.026	0.330462	0.0758018	0.032	0.0083578	0.00048	0.134802	0.017	0.0035	0.187	0.026	341	50	70	2670	150	230	63.3	1.8	3.1	211	19	26	70								Inclusion
TBC-01-04-05-r	Output_1_98	10.494	0.1301	0.014	0.00812	0.00042	0.433218	123.153	6.36997	0.1159	0.015	0.371115	0.0640217	0.014	0.00756623	0.00042	0.246042	0.00867	0.0015	0.1159	0.015	174	16	30	1890	150	240	52.1	1.6	2.7	124.1	6.6	13	58.0177								Inclusion
TBC-01-04-06-c	Output_1_99	21.227	0.388	0.043	0.0419	0.0029	0.529707	23.8664	1.65185	0.0689	0.0071	0.557563	0.634203	0.043	0.043862	0.0029	0.698153	0.00453	0.00068	0.0689	0.0071	91.3	3.3	14	901	40	210	264	15	18	331	16	31	20.2417								Zircon	1878	30	31.9	2.7	3673	77	450900
TBC-01-04-06-r	Output_1_100	31.358	0.0715	0.0079	0.004361	0.00019	0.366829	229.305	9.99037	0.1159	0.013	0.362071	0.0404034	0.0079	0.00411391	0.00019	0.229879	0.00319	0.00049	0.1159	0.013	64.4	3	9.8	1890	88	210	28.05	0.49	1.2	70.4	3.8	7.6	60.1563								Inclusion
TBC-01-05-01-r	Output_1_102	30.029	0.39	0.04	0.0452	0.0027	0.503277	22.1239	1.32156	0.06313	0.0065	0.501822	0.552555	0.04	0.0465204	0.0027	0.625525	0.00915	0.0014	0.06313	0.0065	184	11	29	711	34	220	285	12	17	335	11	30	14.9254								Inclusion
TBC-01-05-02-c	Output_1_103	30.826	0.1648	0.017	0.01794	0.0012	0.544065	55.7414	3.72852	0.0683	0.0073	0.530505	0.0874065	0.017	0.0172562	0.0012	0.336671	0.01463	0.0022	0.0683	0.0073	293.6	8.1	43	862	66	220	114.6	6.2	7.7	154.5	6.6	15	25.8252								Zircon	854	59	10.8	1.3	1810	130	481100
TBC-01-05-02-r	Output_1_104	23.651	0.473	0.05	0.0505	0.0027	0.451337	19.802	1.05872	0.0685	0.0074	0.443565	0.616575	0.05	0.0516561	0.0027	0.541765	0.01196	0.0018	0.0685	0.0074	240.2	6.6	35	890	76	230	318	10	16	394	15	35	19.2893								Zircon	432	21	10.7	1.4	1336	27	448300
TBC-01-05-03-r	Output_1_106	4.2519	0.312	0.04	0.00659	0.00065	0.609769	151.745	14.9673	0.3519	0.036	0.694085	0.0390336	0.04	0.00422276	0.00065	0.148542	0.0301	0.0052	0.3519	0.036	600	56	100	3714	30	160	42.4	3.8	4.1	275	20	31	84.5818								Inclusion
TBC-01-05-04-c	Output_1_110	2.6574	0.99	0.11	0.0967	0.0053	0.442384	10.3413	0.566791	0.073	0.0084	0.430024	1.04586	0.11	0.0972907	0.0053	0.459917	0.0257	0.0043	0.073	0.0084	513	40	84	1010	110	240	595	21	31	698	25	54	14.7564								Zircon	866	58	11.9	5.2	1579	80	423000
TBC-01-06-02-r	Output_1_114	26.574	0.2088	0.021	0.02134	0.00094	0.40118	46.8604	2.06414	0.0711	0.0074	0.389756	0.155814	0.021	0.0208934	0.00094	0.316639	0.0384	0.006	0.0711	0.0074	761	43	120	952	45	210	136.1	2.4	5.9	192.4	4.3	17	29.262								Inclusion
TBC-01-06-08-r	Output_1_123	30.56	0.3	0.04	0.0229	0.0028	0.67587	43.6681	5.33933	0.1131	0.014	0.702744	0.18107	0.04	0.0214271	0.0028	0.509127	0.0361	0.0057	0.1131	0.014	717	44	110	1780	120	210	146	17	18	263	21	30	44.4867								Zircon	1150	120	81	15	6600	1100	447400
TBC-01-07-03-r	Output_1_127	3.9861	4.19	1	0.0699	0.0077	0.419074	14.3062	1.57593	0.422	0.068	0.564354	0.504217	1	0.0407167	0.0077	0.0949227	0.181	0.043	0.422	0.068	3350	580	730	3960	190	240	435	43	46	1640	180	190	73.4756								Zircon	474	32	17.8	3.3	1950	120	476000
TBC-01-07-03-r	Output_1_128	20.728	0.736	0.081	0.0436	0.0021	0.400933	22.9358	1.10471	0.1224	0.014	0.388095	0.24492	0.081	0.0395307	0.0021	0.158596	0.0299	0.0046	0.1224	0.014	595	30	90	1980	110	210	274.8	7.5	13	566	26	51	51.4488								Zircon	502	35	17.7	1.7	2258	62	478200
TBC-01-07-05-r	Output_1_130	31.889	0.1127	0.012	0.00689	0.0004	0.478703	145.138	8.426	0.1166	0.012	0.491321	0.0511688	0.012	0.00638762	0.0004	0.257982	0.01584	0.0024	0.1166	0.012	318	12	47	1897	48	190	44.3	1.8	2.6	108.2	4.5	11	59.0573								Inclusion
TBC-01-08-02-c	Output_1_140	6.3778	0.652	0.08	0.0667	0.0032	0.364157	14.9925	0.71928	0.073	0.009	0.362649	0.497426	0.08	0.0652751	0.0032	0.291574	0.0311	0.0049	0.073	0.009	618	36	96	1030	160	280	416	10	19	508	31	49	18.1102								Zircon	854	26	9.4	1.8	1720	37	468000
TBC-01-08-02-c	Output_1_141	20.196	0.938	0.094	0.0937	0.0039	0.383568	10.6724	0.444207	0.0719	0.0077	0.362256	0.67458	0.094	0.0916422	0.0039	0.292086	0.03898	0.0057	0.0719	0.0077	773	18	110	1001	66	210	577.2	6.7	23	671	15	50	13.9791								Zircon	729	18	9.6	1.5	1103	24	447700
TBC-01-08-03-r	Output_1_143	5.0491	0.736	0.082	0.0531	0.0055	0.680886	18.8324	1.95062	0.106	0.015	0.590639	0.268354	0.082	0.0489097	0.0055	0.345368	0.0342	0.0057	0.106	0.015	680	55	110	1700	190	270	333	31	33	559	25	48	40.4293								Zircon	239	15	8.2	1.8	705	32	484000
TBC-01-08-05-r	Output_1_147	25.511	0.922	0.1	0.0231	0.001	0.370697	43.29	1.87403	0.297	0.035	0.344818	0.219211	0.1	0.0170181	0.001	0.127755	0.025	0.0038	0.297	0.035	499	21	75	3409	92	180	147.2	2.4	6.4	665	30	56	77.8647								Inclusion
TBC-01-08-06-r	Output_1_148	11.427	0.99	0.21	0.0213	0.0024	0.469112	46.9484	5.28996	0.391	0.076	0.501517		0.21	0.0103593	0.0024		0.08	0.018	0.391	0.076	1610	240	320	3830	240	280	136	14	15	712	94	110	80.8989								Inclusion
TBC-01-08-07-r	Output_1_150	11.958	0.288	0.033	0.01554	0.00081	0.414068	64.3501	3.35415	0.1363	0.015	0.428046	0.476549	0.033	0.0170914	0.00081	0.564781	0.00318	0.00051	0.1363	0.015	64.1	4.6	10	2168	76	190	99.4	3.2	5.1	256	15	26	61.1719								Inclusion
TBC-01-08-07-r	Output_1_151	4.2519	1.79	0.25	0.0379	0.0032	0.517349	26.3852	2.22778	0.348	0.037	0.621885	0.229589	0.25	0.0246922	0.0032	0.118181	0.0522	0.011	0.348	0.037	1030	150	210	3695	45	160	240	17	20	1037	67	92	76.8563								Inclusion
TBC-01-08-09-c	Output_1_153	5.8463	1.254	0.13	0.0511	0.0033	0.528742	19.5695	1.26378	0.185	0.022	0.477225	0.323689	0.13	0.0430058	0.0033	0.187666	0.1223	0.018	0.185	0.022	2332	86	330	2680	100	200	321	15	20	824	26	60	61.0437								Zircon	989	35	13.7	4.8	2150	130	478000
TBC-01-08-09-c	Output_1_154	8.7695	1.843	0.19	0.1551	0.0068	0.391354	6.44745	0.282674	0.0843	0.009	0.379876	1.22695	0.19	0.150571	0.0068	0.279972	0.0568	0.0084	0.0843	0.009	1117	27	160	1309	72	230	929	15	38	1060	22	67	12.3585								Zircon	812	33	9	2.3	2329	64	452800
TBC-01-08-10-r	Output_1_155	14.084	0.679	0.069	0.0638	0.0028	0.39648	15.674	0.687886	0.0793	0.0085	0.378911	0.596485	0.069	0.0629718	0.0028	0.358789	0.0257	0.0042	0.0793	0.0085	513	36	82	1182	66	200	398.7	6.5	17	525	14	42	24.0571								Zircon	1111	30	9.6	1.7	2497	59	466900
TBC-01-08-11-cx	Output_1_158	1.8602	2.06	0.4	0.1257	0.0096	0.366023	7.95545	0.607576	0.121	0.021	0.402777	0.704351	0.4	0.114586	0.0096	0.145946	0.107	0.019	0.121	0.021	2050	200	350	1950	260	320	763	47	55	1130	110	130	32.4779								Zircon	346	21	13	4.1	1078	46	456600
TBC-01-08-11-cx	Output_1_159	17.273	1.381	0.14	0.1116	0.0048	0.390572	8.96057	0.385401	0.0908	0.0097	0.373482	0.651113	0.14	0.105608	0.0048	0.206813	0.066	0.0097	0.0908	0.0097	1291	21	180	1430	59	200	681.9	9.7	28	880	16	58	22.5114								Zircon	289	12	12.5	1.5	1069	20	444800
STO-01
Concordant-Autocrysts
STO-02-02-01-c	Output_1_138	31.551	0.594	0.039	0.07855	0.0022	0.39237	12.7307	0.356558	0.0543	0.0052	0.280706	0.61732	0.039	0.0787907	0.0022	0.404248	0.02366	0.003	0.0543	0.0052	472.7	7.9	59	373	66	220	487.4	5.1	13	472	11	25	3.26271	488.9	13	0.61732	0.039	0.0787907	0.0022	0.404248	Zircon	252.5	7.5	4.3	0.67	1299	28	462400
STO-02-02-02-c	Output_1_139	11.326	0.551	0.039	0.0751	0.0025	0.425593	13.3156	0.443262	0.0533	0.0054	0.312156	0.597329	0.039	0.0754733	0.0025	0.45244	0.02239	0.0029	0.0533	0.0054	447	14	57	328	98	220	466.8	9.1	15	445	14	26	4.89888	469.047	15	0.597329	0.039	0.0754733	0.0025	0.45244	Zircon	227.1	9.4	3.64	0.89	1878	59	505700
STO-02-03-01-r	Output_1_141	14.158	0.589	0.042	0.0751	0.0024	0.408971	13.3156	0.425531	0.0566	0.0056	0.307362	0.648058	0.042	0.0756088	0.0024	0.439858	0.0219	0.0028	0.0566	0.0056	440	11	52	454	90	220	466.9	8	14	472	17	29	1.08051	466.9	14	0.589	0.042	0.0751	0.0024	0.408971	Zircon	712	40	4.3	1.2	1710	190	484000
STO-02-03-01-c	Output_1_142	29.124	0.62	0.041	0.07642	0.0022	0.399152	13.0856	0.376711	0.0577	0.0055	0.289117	0.609195	0.041	0.0764322	0.0022	0.393226	0.02373	0.003	0.0577	0.0055	474	7.9	59	532	63	210	474.7	5.9	13	490	12	26	3.12245	474.792	13	0.609195	0.041	0.0764322	0.0022	0.393226	Zircon	229	6.1	3.67	0.57	837	12	476900
STO-02-03-02-r	Output_1_143	28.113	0.578	0.04	0.07737	0.0022	0.380052	12.9249	0.367517	0.0537	0.0052	0.281748	0.609521	0.04	0.0776715	0.0022	0.396274	0.02315	0.0029	0.0537	0.0052	462.6	9.6	58	351	74	220	481.1	5.5	13	462	14	26	4.1342	482.209	13	0.609521	0.04	0.0776715	0.0022	0.396274	Zircon	238.4	7.3	4.2	0.65	1038	20	470100
STO-02-03-04-c	Output_1_145	25.281	0.62	0.04	0.07705	0.0021	0.389152	12.9786	0.353732	0.0574	0.0055	0.273591	0.5924	0.04	0.0769101	0.0021	0.374889	0.02438	0.0031	0.0574	0.0055	486.9	9.7	61	499	65	210	478.4	4.5	13	490	11	25	2.36735	477.653	13	0.5924	0.04	0.0769101	0.0021	0.374889	Zircon	247.9	5.4	3.06	0.7	1103	42	475000
STO-02-03-07-c	Output_1_149	28.315	0.619	0.043	0.0764	0.0022	0.38293	13.089	0.376908	0.0578	0.0057	0.280294	0.666432	0.043	0.0768726	0.0022	0.405453	0.02285	0.0029	0.0578	0.0057	457	10	57	505	76	210	474.4	6	13	490	14	26	3.18367	474.4	13	0.619	0.043	0.0764	0.0022	0.38293	Zircon	286	18	6.52	0.93	1205	65	486900
STO-02-03-09-c	Output_1_151	25.686	0.612	0.042	0.0762	0.0023	0.402601	13.1234	0.396112	0.0575	0.0055	0.30093	0.601549	0.042	0.0761812	0.0023	0.396898	0.02373	0.003	0.0575	0.0055	474	12	60	501	68	220	473.4	7	14	485	13	26	2.39175	473.288	14	0.601549	0.042	0.0761812	0.0023	0.396898	Zircon	307	16	7.45	0.86	1910	160	479800
STO-02-03-11-r	Output_1_154	26.697	0.605	0.037	0.07767	0.0021	0.404346	12.875	0.348107	0.0552	0.0052	0.275875	0.633533	0.037	0.0780183	0.0021	0.418567	0.0226	0.0028	0.0552	0.0052	451.7	6.9	56	424	50	210	482.2	4	13	481	7.8	24	0.24948	482.2	13	0.605	0.037	0.07767	0.0021	0.404346	Zircon	296.3	8.1	2.55	0.54	1575	26	497400
STO-02-03-15-c	Output_1_162	24.125	0.611	0.041	0.07838	0.0022	0.385889	12.7584	0.358106	0.0542	0.0053	0.275898	0.653525	0.041	0.0789354	0.0022	0.405991	0.02315	0.0029	0.0542	0.0053	462.5	8.1	58	378	74	210	486.4	5.2	13	483	12	26	0.703934	486.4	13	0.611	0.041	0.07838	0.0022	0.385889	Zircon	266.4	9	7.4	1	1394	29	489700
STO-02-03-15-r	Output_1_163	27.809	0.618	0.044	0.07806	0.0022	0.368061	12.8107	0.361048	0.0563	0.0056	0.272612	0.697077	0.044	0.0788061	0.0022	0.40448	0.02241	0.0029	0.0563	0.0056	450	14	58	471	86	210	484.5	5.5	13	486	16	28	0.308642	484.5	13	0.618	0.044	0.07806	0.0022	0.368061	Zircon	239.5	8.1	7.51	0.87	697	11	487200
STO-02-03-17-r	Output_1_167	30.09	0.599	0.038	0.07676	0.0021	0.395995	13.0276	0.35641	0.0551	0.0052	0.278427	0.601452	0.038	0.0769116	0.0021	0.396701	0.02362	0.003	0.0551	0.0052	471.8	6.7	59	411	51	210	476.8	4.7	13	477.2	8.8	23	0.0838223	476.8	13	0.599	0.038	0.07676	0.0021	0.395995	Zircon	286	7.4	4.87	0.76	1073	14	455300
STO-02-03-20-r	Output_1_174	7.5744	0.641	0.054	0.07868	0.0022	0.315013	12.7097	0.355381	0.0574	0.0064	0.243246	0.662491	0.054	0.0790071	0.0022	0.323276	0.02328	0.003	0.0574	0.0064	465	14	59	480	130	220	488.2	5.8	13	502	23	32	2.749	488.2	13	0.641	0.054	0.07868	0.0022	0.315013	Zircon	508	15	2.15	0.89	2886	61	505000
STO-02-03-21-r	Output_1_176	15.452	0.618	0.05	0.0777	0.0023	0.343594	12.87	0.380966	0.0559	0.0063	0.254034	0.612335	0.05	0.0778121	0.0023	0.340377	0.02382	0.0031	0.0559	0.0063	476	19	62	460	140	240	482.2	7.3	14	492	23	34	1.99187	483.05	14	0.612335	0.05	0.0778121	0.0023	0.340377	Zircon	221	6.4	6.6	1.1	649	7.6	477300
STO-02-04-01-c	Output_1_177	11.816	0.623	0.041	0.076	0.0022	0.40263	13.1579	0.380886	0.0569	0.0054	0.29175	0.571275	0.041	0.0757981	0.0022	0.374915	0.02402	0.003	0.0569	0.0054	479.7	8.7	60	478	62	210	472.1	6.4	13	491	12	26	3.84929	470.993	13	0.571275	0.041	0.0757981	0.0022	0.374915	Zircon	469	18	5.7	1.4	3170	77	438500
STO-02-04-07-r	Output_1_185	6.5534	0.674	0.049	0.0776	0.0023	0.377521	12.8866	0.381948	0.0613	0.0061	0.285456	0.591839	0.049	0.0770795	0.0023	0.339061	0.0259	0.0034	0.0613	0.0061	517	22	67	641	87	210	481.9	6.4	14	523	18	30	7.85851	478.667	14	0.591839	0.049	0.0770795	0.0023	0.339061	Zircon	246	10	4.6	1.4	1204	30	470500
STO-02-04-08-r	Output_1_187	16.045	0.635	0.045	0.0785	0.0023	0.382078	12.7388	0.37324	0.0563	0.0056	0.28256	0.761014	0.045	0.07974	0.0023	0.438412	0.02187	0.0028	0.0563	0.0056	437.2	8.9	55	456	89	230	487.4	6.2	14	498	15	28	2.12851	487.4	14	0.635	0.045	0.0785	0.0023	0.382078	Zircon	450	40	59.1	4.7	2066	65	437200
STO-02-04-09-r	Output_1_189	24.632	0.56	0.038	0.0745	0.0022	0.399034	13.4228	0.396379	0.0534	0.0051	0.2954	0.655123	0.038	0.0753737	0.0022	0.4495	0.02041	0.0026	0.0534	0.0051	408.4	8.7	51	337	71	220	463.3	7	13	452	12	24	2.5	463.3	13	0.56	0.038	0.0745	0.0022	0.399034	Zircon	208.8	8.2	3.97	0.75	909	20	444800
STO-02-04-11-c	Output_1_191	25.988	0.629	0.051	0.0778	0.0026	0.381069	12.8535	0.42955	0.0564	0.0058	0.309061	0.70605	0.051	0.0786272	0.0026	0.416246	0.02231	0.0029	0.0564	0.0058	446	12	56	430	110	220	482.6	9.7	15	492	22	32	1.91057	482.6	15	0.629	0.051	0.0778	0.0026	0.381069	Zircon	245	15	4.65	0.86	1100	49	459100
STO-02-04-12-c	Output_1_192	7.6833	0.545	0.051	0.0757	0.0028	0.367592	13.21	0.488614	0.0507	0.0056	0.317543	0.579866	0.051	0.0761162	0.0028	0.385861	0.02261	0.003	0.0507	0.0056	452	17	58	220	130	240	470	12	17	440	26	34	6.81818	472.899	17	0.579866	0.051	0.0761162	0.0028	0.385861	Zircon	235	20	5.4	1.4	1375	45	459000
STO-02-04-15-c	Output_1_195	32.541	0.579	0.036	0.07662	0.0021	0.403361	13.0514	0.357713	0.0535	0.005	0.281414	0.590938	0.036	0.0768324	0.0021	0.409346	0.02291	0.0029	0.0535	0.005	457.8	6.1	57	335	52	210	475.9	4.6	13	465.4	7.9	23	2.25612	477.188	13	0.590938	0.036	0.0768324	0.0021	0.409346	Zircon	248.4	6.4	1.9	0.42	1066	22	447300
STO-02-05-01-c	Output_1_197	29.066	0.613	0.041	0.0787	0.0023	0.400394	12.7065	0.371346	0.0554	0.0054	0.287195	0.658691	0.041	0.0791718	0.0023	0.422924	0.02344	0.003	0.0554	0.0054	468.2	9.1	59	416	71	200	489.1	6.4	14	486	12	25	0.63786	489.1	14	0.613	0.041	0.0787	0.0023	0.400394	Zircon	350	32	3.64	0.67	1602	50	470300
STO-02-05-03-r	Output_1_200	17.866	0.616	0.046	0.0767	0.0022	0.358564	13.0378	0.373966	0.0575	0.0059	0.269219	0.615835	0.046	0.0767655	0.0022	0.358214	0.02364	0.0031	0.0575	0.0059	472	16	61	480	100	220	476.2	6.2	13	486	18	29	2.01646	476.2	13	0.616	0.046	0.0767	0.0022	0.358564	Zircon	225.8	9.5	3.02	0.59	772	13	491300
STO-02-05-04-c	Output_1_201	28.799	0.612	0.051	0.07697	0.0022	0.324437	12.9921	0.371347	0.0568	0.0063	0.249544	0.641251	0.051	0.0772863	0.0022	0.33698	0.02302	0.0029	0.0568	0.0063	460	11	58	440	130	230	478	5.9	13	483	23	32	1.0352	478	13	0.612	0.051	0.07697	0.0022	0.324437	Zircon	250	7.6	6.86	0.8	1015	38	465000
STO-02-05-04-r	Output_1_202	12.266	0.591	0.042	0.078	0.0025	0.411128	12.8205	0.410914	0.0549	0.0056	0.299767	0.624854	0.042	0.0782832	0.0025	0.429143	0.02331	0.003	0.0549	0.0056	466	13	59	390	100	220	484	8.7	15	474	16	28	2.1097	485.867	15	0.624854	0.042	0.0782832	0.0025	0.429143	Zircon	329	13	5.21	0.99	1553	48	466600
STO-02-05-05-c	Output_1_204	28.266	0.588	0.039	0.076	0.0022	0.400001	13.1579	0.380886	0.0544	0.0053	0.284814	0.613285	0.039	0.0763554	0.0022	0.412701	0.02267	0.0029	0.0544	0.0053	453.1	6.8	56	386	81	220	472.4	6.3	13	470	12	25	0.510638	472.4	13	0.588	0.039	0.076	0.0022	0.400001	Zircon	210.5	6.8	2.91	0.48	1578	28	466900
STO-02-05-07-c	Output_1_206	28.799	0.606	0.047	0.0785	0.0026	0.392737	12.7388	0.421924	0.0546	0.0057	0.30241	0.662998	0.047	0.0790901	0.0026	0.420697	0.02322	0.003	0.0546	0.0057	464	13	59	370	110	220	487.2	9.9	16	478	19	29	1.92469	487.2	16	0.606	0.047	0.0785	0.0026	0.392737	Zircon	272	11	8.6	1	1150	79	452300
STO-02-05-08-r	Output_1_207	26.399	0.622	0.04	0.0762	0.0023	0.424884	13.1234	0.396112	0.0584	0.0054	0.310317	0.58628	0.04	0.0759792	0.0023	0.405562	0.0246	0.0031	0.0584	0.0054	491	12	62	542	43	200	473.2	7.3	13	491	10	25	3.62525	472.078	13	0.58628	0.04	0.0759792	0.0023	0.405562	Zircon	252.3	9.6	1.83	0.46	1201	39	456700
STO-02-05-10-c	Output_1_209	29.066	0.569	0.046	0.0772	0.0025	0.371846	12.9534	0.419474	0.0516	0.0056	0.285932	0.574989	0.046	0.0774122	0.0025	0.374327	0.02324	0.003	0.0516	0.0056	464	12	59	230	120	210	480.7	9.1	15	460	20	28	4.5	480.658	15	0.574989	0.046	0.0774122	0.0025	0.374327	Zircon	187.4	8.4	4.47	0.73	578	26	455100
STO-02-05-14-c	Output_1_215	27.199	0.601	0.042	0.0765	0.0023	0.395199	13.0719	0.393011	0.0558	0.0056	0.286978	0.676226	0.042	0.0772183	0.0023	0.432415	0.02166	0.0028	0.0558	0.0056	433.1	9.5	54	428	87	210	475.3	6.6	14	479	15	27	0.772443	475.3	14	0.601	0.042	0.0765	0.0023	0.395199	Zircon	405	30	5.48	0.78	1510	47	508000
STO-02-05-14-r	Output_1_216	28.532	0.606	0.046	0.07664	0.0022	0.353718	13.048	0.374552	0.056	0.0058	0.267089	0.655884	0.046	0.077166	0.0022	0.37658	0.02169	0.0028	0.056	0.0058	434	13	55	440	110	230	476	5.6	13	478	19	29	0.41841	476	13	0.606	0.046	0.07664	0.0022	0.353718	Zircon	211.3	9.2	4.09	0.66	843	12	500200
STO-02-07-03-r	Output_1_241	17.352	0.596	0.04	0.07692	0.0021	0.376803	13.0005	0.354928	0.0578	0.0056	0.271224	0.603484	0.04	0.0768444	0.0021	0.381172	0.02423	0.0031	0.0578	0.0056	483.9	9.5	61	506	73	210	477.7	4.8	13	474	12	25	0.780591	477.26	13	0.603484	0.04	0.0768444	0.0021	0.381172	Zircon	714	45	2.48	0.59	1794	31	470800
Xenocryst
STO-02-03-21-c	Output_1_175	29.086	0.617	0.041	0.07995	0.0023	0.39729	12.5078	0.359825	0.0546	0.0053	0.284148	0.767003	0.041	0.081299	0.0023	0.467772	0.02264	0.0029	0.0546	0.0053	452.5	7.2	56	390	77	220	495.8	5.9	14	488	13	26	1.59836	495.8	14	0.617	0.041	0.07995	0.0023	0.39729	Zircon	402	14	8.01	0.72	1949	96	479300
STO-02-03-12-c	Output_1_156	12.135	0.596	0.07	0.0799	0.0026	0.267002	12.5156	0.407268	0.0544	0.0075	0.229716	0.662462	0.07	0.0804174	0.0026	0.292586	0.0231	0.0031	0.0544	0.0075	462	21	61	330	210	280	495.6	9.4	15	470	39	45	5.44681	498.613	15	0.662462	0.07	0.0804174	0.0026	0.292586	Zircon	226.4	8.8	8.2	1.7	749	24	468100
STO-02-03-14-c	Output_1_159	27.993	0.6171	0.037	0.08047	0.0021	0.399087	12.427	0.324303	0.05431	0.005	0.272717	0.669533	0.037	0.0810182	0.0021	0.424647	0.0229	0.0029	0.05431	0.005	457.7	4.6	57	378	33	210	498.9	3.2	13	487.7	5.7	23	2.29649	498.9	13	0.6171	0.037	0.08047	0.0021	0.399087	Zircon	1120	110	2.49	0.52	3940	67	474500
STO-02-05-13-c	Output_1_213	27.732	0.642	0.049	0.0808	0.0026	0.388486	12.3762	0.398245	0.0558	0.0057	0.300453	0.796315	0.049	0.0822264	0.0026	0.457054	0.02202	0.0028	0.0558	0.0057	440.1	9.7	55	440	100	230	500.5	9.2	15	503	19	30	0.497018	500.5	15	0.642	0.049	0.0808	0.0026	0.388486	Zircon	225	12	5.38	0.77	1289	28	500700
STO-02-05-11-c	Output_1_211	27.466	0.62	0.038	0.0808	0.0022	0.405984	12.3762	0.336977	0.0546	0.0051	0.27985	0.641813	0.038	0.0810756	0.0022	0.416635	0.0243	0.0031	0.0546	0.0051	485.4	6.2	60	394	43	200	500.9	4.5	13	489.6	7.3	24	2.30801	502.54	13	0.641813	0.038	0.0810756	0.0022	0.416635	Zircon	605	25	2.34	0.55	2147	44	431900
STO-02-05-09-r	Output_1_208	30.132	0.758	0.048	0.08216	0.0023	0.404328	12.1714	0.340727	0.0658	0.0061	0.289077	0.632323	0.048	0.0812414	0.0023	0.349437	0.03048	0.0039	0.0658	0.0061	607	11	76	793	38	190	509	5.7	14	572.2	9.9	27	11.0451	503.528	14	0.632323	0.048	0.0812414	0.0023	0.349437	Zircon	372	16	1.73	0.44	1425	79	434200
STO-02-03-10-c	Output_1_152	22.45	0.604	0.041	0.08137	0.0023	0.38441	12.2895	0.347376	0.0528	0.0052	0.275871	0.724268	0.041	0.0824472	0.0023	0.442036	0.02263	0.0029	0.0528	0.0052	452.3	7.6	56	326	82	210	504.3	5.6	14	481	13	26	4.84407	504.3	14	0.604	0.041	0.08137	0.0023	0.38441	Zircon	249	18	4.8	1	1764	77	497400
STO-02-04-14-c	Output_1_194	29.603	0.62	0.043	0.08131	0.0023	0.377653	12.2986	0.347888	0.0536	0.0053	0.275038	0.624363	0.043	0.0815034	0.0023	0.379157	0.02458	0.0031	0.0536	0.0053	491	10	62	344	82	220	503.9	5.7	14	488	14	27	3.2582	505.09	14	0.624363	0.043	0.0815034	0.0023	0.379157	Zircon	287	25	2.52	0.56	954	82	465500
STO-02-03-18-r	Output_1_169	12.147	0.65	0.041	0.08184	0.0022	0.392055	12.219	0.328467	0.0563	0.0053	0.27458	0.606344	0.041	0.0816064	0.0022	0.37034	0.02675	0.0034	0.0563	0.0053	533.5	9.8	67	473	41	180	507.1	4.8	13	508	9.3	25	0.177165	507.1	13	0.65	0.041	0.08184	0.0022	0.392055	Zircon	567	35	1.82	0.53	2472	40	460000
STO-02-03-18-c	Output_1_168	30.09	0.707	0.043	0.08377	0.0023	0.411448	11.9375	0.327756	0.0592	0.0055	0.283411	0.628368	0.043	0.0833214	0.0023	0.374093	0.02746	0.0035	0.0592	0.0055	547.6	6.5	68	576	39	200	518.5	3.8	13	542.7	7.5	26	4.45919	515.917	13	0.628368	0.043	0.0833214	0.0023	0.374093	Zircon	394.2	8.8	2.59	0.58	3039	43	445800
STO-02-03-12-c	Output_1_155	12.944	0.654	0.052	0.0879	0.0027	0.360365	11.3766	0.349451	0.0531	0.0058	0.270716	0.757933	0.052	0.0888319	0.0027	0.40505	0.02426	0.0031	0.0531	0.0058	484	14	61	310	130	230	543.1	8.6	16	509	22	32	6.69941	548.625	16	0.757933	0.052	0.0888319	0.0027	0.40505	Zircon	221.6	8.7	6.3	1.3	1052	42	496000
STO-02-02-03-c	Output_1_140	28.517	0.768	0.055	0.0943	0.0028	0.383	10.6044	0.314872	0.0583	0.0058	0.285994	0.921458	0.055	0.095627	0.0028	0.440419	0.02798	0.0035	0.0583	0.0058	557.8	8.5	69	564	89	220	581	7.7	16	582	17	30	0.171821	581	16	0.768	0.055	0.0943	0.0028	0.383	Zircon	673	13	11	1.4	1212	17	478900
STO-02-03-17-c	Output_1_166	7.7296	0.993	0.066	0.1087	0.0037	0.455828	9.19963	0.313143	0.0644	0.0064	0.324034	1.106	0.066	0.109837	0.0037	0.491586	0.02939	0.0037	0.0644	0.0064	585	12	73	744	81	210	665	14	21	700	16	34	5	665	21	0.993	0.066	0.1087	0.0037	0.455828	Zircon	389	20	7.6	2.2	970	11	455800
Pb loss
STO-02-03-14-r	Output_1_160	8.8398	0.172	0.016	0.01933	0.001	0.486027	51.7331	2.67631	0.0623	0.0062	0.461237	0.144491	0.016	0.0191498	0.001	0.426531	0.00686	0.00094	0.0623	0.0062	138.1	7.9	19	694	78	200	123.4	5.5	6.3	161	11	14	23.354	122.281	6.3	0.144491	0.016	0.0191498	0.001	0.426531	Inclusion
STO-02-06-04-c	Output_1_222	9.333	0.284	0.029	0.029	0.0021	0.578464	34.4828	2.49703	0.0691	0.0067	0.598376	0.231832	0.029	0.0286297	0.0021	0.50583	0.01168	0.0016	0.0691	0.0067	235	13	32	891	75	210	184	13	13	253	19	23	27.2727	181.966	13	0.231832	0.029	0.0286297	0.0021	0.50583	Inclusion
STO-02-02-01-r	Output_1_137	26.899	0.42	0.027	0.05258	0.0015	0.405622	19.0186	0.542563	0.0576	0.0055	0.286263	0.384558	0.027	0.0523087	0.0015	0.378107	0.01755	0.0022	0.0576	0.0055	351.7	5.5	44	516	58	200	330.4	3.5	9	355.7	7.4	19	7.11274	328.68	9	0.384558	0.027	0.0523087	0.0015	0.378107	Zircon	228.1	8.6	1.68	0.42	1002	12	462400
STO-02-04-02-r	Output_1_179	26.864	0.524	0.034	0.0587	0.0018	0.42728	17.0358	0.522392	0.0631	0.006	0.306922	0.423919	0.034	0.057987	0.0018	0.360941	0.022	0.0028	0.0631	0.006	440	11	56	700	61	200	367.4	6.4	11	427	10	23	13.9578	363.372	11	0.423919	0.034	0.057987	0.0018	0.360941	Zircon	314.1	8.6	40	7.5	1963	42	505200
STO-02-06-19-c	Output_1_232	15.733	0.522	0.034	0.06163	0.0018	0.409155	16.2259	0.473902	0.062	0.0059	0.293408	0.502482	0.034	0.0614315	0.0018	0.397377	0.0198	0.0025	0.062	0.0059	396.2	8.7	50	665	62	200	385.5	4.8	11	426	10	23	9.50704	384.325	11	0.502482	0.034	0.0614315	0.0018	0.397377	Zircon	245.1	8.5	2.93	0.68	2393	67	509400
STO-02-03-06-c	Output_1_147	17.394	0.503	0.042	0.0624	0.0027	0.460095	16.0256	0.693417	0.0568	0.0056	0.401874	0.396451	0.042	0.0616433	0.0027	0.382077	0.0217	0.0029	0.0568	0.0056	434	18	57	462	81	220	390	13	16	412	20	28	5.33981	390	16	0.503	0.042	0.0624	0.0027	0.460095	Zircon	256	13	4.84	0.97	1372	82	473300
STO-02-03-13-r	Output_1_158	32.044	0.517	0.033	0.0638	0.0021	0.458324	15.674	0.515915	0.058	0.0054	0.333318	0.336382	0.033	0.0623734	0.0021	0.324609	0.02516	0.0032	0.058	0.0054	502.3	8.3	63	517	47	210	398.7	7.9	13	422.5	9.5	22	5.63314	398.7	13	0.517	0.033	0.0638	0.0021	0.458324	Zircon	229.3	6.4	3.34	0.65	1045	18	477600
STO-02-04-10-c	Output_1_190	14.689	0.536	0.036	0.06417	0.0018	0.385381	15.5836	0.437128	0.059	0.0057	0.278832	0.638086	0.036	0.0651256	0.0018	0.439935	0.01851	0.0023	0.059	0.0057	370.7	6.7	46	572	69	200	400.9	4.3	11	435	12	24	7.83908	400.9	11	0.536	0.036	0.06417	0.0018	0.385381	Zircon	419	19	4.72	0.72	3910	120	451200
STO-02-03-16-r	Output_1_165	16.011	0.539	0.036	0.06659	0.0019	0.392853	15.0173	0.428485	0.0579	0.0056	0.282953	0.481481	0.036	0.0661806	0.0019	0.358456	0.0222	0.0028	0.0579	0.0056	443.8	9.3	56	511	73	220	415.6	4.7	11	439	11	23	5.3303	413.104	11	0.481481	0.036	0.0661806	0.0019	0.358456	Zircon	320	28	4.17	0.8	1323	35	494700
STO-02-06-24-c	Output_1_237	28.768	0.531	0.033	0.0681	0.0021	0.444485	14.6843	0.452819	0.0582	0.0054	0.315391	0.55118	0.033	0.0681406	0.0021	0.457672	0.02103	0.0027	0.0582	0.0054	420.7	9	53	532	45	200	424.8	6.9	13	434.2	8.4	22	2.1649	424.8	13	0.531	0.033	0.0681	0.0021	0.444485	Zircon	546	12	2.52	0.57	2176	79	473600
STO-02-07-04-c	Output_1_242	20.599	0.539	0.035	0.06837	0.002	0.410736	14.6263	0.427857	0.059	0.0056	0.294526	0.526364	0.035	0.0681275	0.002	0.403884	0.02221	0.0029	0.059	0.0056	444	13	57	563	61	210	426.3	5	12	437	11	23	2.44851	424.865	12	0.526364	0.035	0.0681275	0.002	0.403884	Zircon	252.2	9.5	5.6	1.1	2175	62	456600
STO-02-06-21-c	Output_1_234	19.863	0.632	0.039	0.06986	0.002	0.420847	14.3143	0.409801	0.0666	0.0062	0.293942	0.51234	0.039	0.0688038	0.002	0.35674	0.02679	0.0034	0.0666	0.0062	534	13	67	826	39	190	435.3	4.9	12	497.9	8.4	25	12.5728	428.945	12	0.51234	0.039	0.0688038	0.002	0.35674	Zircon	638	24	2.43	0.66	2780	140	457500
STO-02-05-02-c	Output_1_198	13.866	0.555	0.053	0.069	0.0026	0.367045	14.4927	0.546104	0.0551	0.0063	0.313001	0.460806	0.053	0.0684822	0.0026	0.313458	0.02283	0.003	0.0551	0.0063	456	17	59	380	150	240	430	11	16	446	27	34	3.58744	430	16	0.555	0.053	0.069	0.0026	0.367045	Zircon	350	18	8.5	1.8	1245	27	450800
STO-02-04-08-c	Output_1_186	29.603	0.537	0.034	0.06942	0.0019	0.396793	14.4051	0.394261	0.054	0.0051	0.278344	0.822451	0.034	0.0719266	0.0019	0.538451	0.01639	0.0021	0.054	0.0051	328.5	5.2	41	365	58	200	432.7	4.3	12	437.4	8.4	21	1.07453	432.7	12	0.537	0.034	0.06942	0.0019	0.396793	Zircon	319	14	3.68	0.59	1993	34	445400
STO-02-04-09-c	Output_1_188	29.151	0.609	0.039	0.07007	0.0019	0.38991	14.2714	0.386981	0.061	0.0058	0.274249	0.580498	0.039	0.0699997	0.0019	0.374594	0.02202	0.0028	0.061	0.0058	440.1	6.5	55	624	54	200	436.5	4.4	12	482.3	9.6	24	9.49616	436.154	12	0.580498	0.039	0.0699997	0.0019	0.374594	Zircon	310	18	3.46	0.57	1384	54	470900
STO-02-06-22-c	Output_1_235	16.439	0.538	0.036	0.07	0.0024	0.456007	14.2857	0.489796	0.0563	0.0053	0.342215	0.571479	0.036	0.0702322	0.0024	0.476826	0.02067	0.0026	0.0563	0.0053	413.5	9.4	52	455	56	210	436.2	9.4	14	436	11	24	0.0458716	436.2	14	0.538	0.036	0.07	0.0024	0.456007	Zircon	286	14	1.62	0.64	1802	58	447000
STO-02-04-02-c	Output_1_178	19.996	0.634	0.043	0.07134	0.0021	0.398136	14.0174	0.412623	0.0628	0.0062	0.285733	0.570422	0.043	0.0709549	0.0021	0.365455	0.02337	0.003	0.0628	0.0062	467	15	60	687	83	210	444.2	6	13	498	14	27	10.8032	441.906	13	0.570422	0.043	0.0709549	0.0021	0.365455	Zircon	252	11	8.8	1.1	1674	29	500200
STO-02-03-11-c	Output_1_153	15.169	0.588	0.036	0.07165	0.002	0.414839	13.9567	0.389581	0.05823	0.0054	0.288227	0.512372	0.036	0.0711372	0.002	0.371506	0.02515	0.0032	0.05823	0.0054	502	9.8	63	535	36	200	446.1	4.7	12	469.5	7.1	23	4.98403	443.003	12	0.512372	0.036	0.0711372	0.002	0.371506	Zircon	574	15	1.24	0.57	3450	75	453900
STO-02-04-04-c	Output_1_181	31.137	0.567	0.035	0.0717	0.0022	0.445114	13.947	0.427941	0.0551	0.0052	0.309195	0.653086	0.035	0.0725893	0.0022	0.492261	0.01924	0.0025	0.0551	0.0052	385	11	49	417	47	200	446.3	7.2	13	456.5	7.7	22	2.23439	446.3	13	0.567	0.035	0.0717	0.0022	0.445114	Zircon	1289	68	3.78	0.74	2860	100	477800
STO-02-05-03-c	Output_1_199	25.066	0.658	0.043	0.07299	0.0021	0.402941	13.7005	0.394178	0.0639	0.0062	0.284292	0.517826	0.043	0.0719674	0.0021	0.331525	0.02827	0.0036	0.0639	0.0062	563	11	70	727	68	190	454.1	5.6	13	512	12	27	11.3086	447.998	13	0.517826	0.043	0.0719674	0.0021	0.331525	Inclusion
STO-02-04-06-c	Output_1_183	5.8755	0.582	0.041	0.0725	0.0023	0.410613	13.7931	0.437574	0.0571	0.0056	0.307772	0.618112	0.041	0.0728894	0.0023	0.429583	0.02116	0.0027	0.0571	0.0056	423.2	6.8	53	487	81	220	451.4	8.1	14	465	14	26	2.92473	451.4	14	0.582	0.041	0.0725	0.0023	0.410613	Zircon	577	64	3.3	1.8	3006	94	490000
STO-02-03-05-c	Output_1_146	26.697	0.598	0.044	0.0728	0.0022	0.379919	13.7363	0.415107	0.0582	0.0058	0.290191	0.516366	0.044	0.0722471	0.0022	0.336519	0.02401	0.003	0.0582	0.0058	480	10	60	503	91	220	452.8	7.2	13	474	17	28	4.47257	452.8	13	0.598	0.044	0.0728	0.0022	0.379919	Zircon	214.1	7	5.53	0.86	1227	40	473000
STO-02-03-16-c	Output_1_164	28.827	0.563	0.035	0.07355	0.0021	0.417365	13.5962	0.388199	0.0542	0.0051	0.290362	0.584952	0.035	0.0738408	0.0021	0.429283	0.02227	0.0028	0.0542	0.0051	445.2	5	55	379	53	210	457.5	4.8	12	452.8	8	23	1.03799	457.5	12	0.563	0.035	0.07355	0.0021	0.417365	Zircon	391	12	4.57	0.73	2120	130	472900
STO-02-03-03-c	Output_1_144	23.057	0.617	0.044	0.07394	0.0021	0.370001	13.5245	0.384114	0.0603	0.0061	0.270304	0.590851	0.044	0.0737468	0.0021	0.357164	0.02377	0.003	0.0603	0.0061	475	11	60	580	100	220	459.8	5.2	13	486	16	28	5.39095	458.689	13	0.590851	0.044	0.0737468	0.0021	0.357164	Zircon	195.5	6.8	3.58	0.68	741.2	8.2	476500
STO-02-05-13-r	Output_1_214	22.132	0.585	0.036	0.07434	0.002	0.400573	13.4517	0.361897	0.056	0.0052	0.278284	0.608958	0.036	0.074628	0.002	0.412884	0.0217	0.0027	0.056	0.0052	433.8	6.9	54	452	47	210	462.3	3.7	12	467.7	7.3	23	1.15459	462.3	12	0.585	0.036	0.07434	0.002	0.400573	Zircon	226.5	8.5	3.17	0.82	1891	94	503100
Discordant
STO-02-01-01-c	Output_1_131	28.517	1.174	0.097	0.01785	0.00089	0.516672	56.0224	2.79327	0.4739	0.044	0.473111		0.097	0.00698969	0.00089		0.0243	0.0032	0.4739	0.044	484	20	63	4162	27	140	114	4.8	5.6	792	31	43	85.6061								Inclusion
STO-02-01-01-r	Output_1_132	27.911	0.712	0.048	0.01864	0.00057	0.413085	53.6481	1.64053	0.277	0.026	0.309764		0.048	0.0124005	0.00057		0.03545	0.0045	0.277	0.026	704	18	88	3339	46	150	119.1	1.9	3.6	544	14	28	78.1066								Inclusion
STO-02-01-02-c	Output_1_133	29.326	3.97	0.38	0.0624	0.0043	0.584268	16.0256	1.10433	0.4592	0.042	0.601746		0.38	0.0190243	0.0043		0.153	0.023	0.4592	0.042	2880	220	400	4115	20	140	389	24	26	1616	60	76	75.9282								Inclusion
STO-02-01-02-r	Output_1_134	28.113	1.24	0.16	0.0263	0.0016	0.426459	38.0228	2.31318	0.336	0.038	0.473732		0.16	0.0111433	0.0016		0.02836	0.0037	0.336	0.038	565	18	72	3580	110	180	167.1	9.1	10	821	68	76	79.6468								Inclusion
STO-02-01-03-c	Output_1_135	28.517	3.02	0.2	0.0413	0.0016	0.504936	24.2131	0.938037	0.5288	0.048	0.392539		0.2	0.0063441	0.0016		0.1195	0.016	0.5288	0.048	2278	77	280	4323	10	130	261	7.6	10	1419	26	53	81.6068								Inclusion
STO-02-01-03-r	Output_1_136	5.663	0.52	0.037	0.02663	0.00086	0.413291	37.5516	1.21271	0.1397	0.014	0.30672	0.0311501	0.037	0.0226041	0.00086	0.0320145	0.02805	0.0036	0.1397	0.014	559	17	71	2220	56	160	169.4	3.3	5.4	425	15	25	60.1412								Inclusion
STO-02-03-06-r	Output_1_148	11.528	0.532	0.039	0.03189	0.001	0.393283	31.3578	0.983311	0.1191	0.012	0.297167	0.215448	0.039	0.0293213	0.001	0.185148	0.01711	0.0022	0.1191	0.012	343	10	44	1946	70	170	202.3	3.6	6.3	435	16	27	53.4943								Inclusion
STO-02-03-08-c	Output_1_150	27.911	1.005	0.08	0.0786	0.0021	0.318195	12.7226	0.339918	0.0911	0.0097	0.24338	0.630724	0.08	0.0756935	0.0021	0.213679	0.033	0.0044	0.0911	0.0097	656	29	86	1400	110	210	487.8	3.3	12	700	27	41	30.3143								Zircon	625	27	4.45	0.78	3480	42	466500
STO-02-03-13-c	Output_1_157	25.967	2.655	0.17	0.1984	0.0061	0.432863	5.04032	0.15497	0.0943	0.0087	0.316163	2.62954	0.17	0.198794	0.0061	0.428785	0.05614	0.0071	0.0943	0.0087	1104	16	140	1514	25	180	1169	18	32	1314	17	46	11.035								Zircon	627	21	6.57	0.9	1469	41	472000
STO-02-03-14-r	Output_1_161	1.2891	2.435	0.17	0.123	0.0074	0.652797	8.13008	0.489127	0.1402	0.013	0.544298	0.63338	0.17	0.109063	0.0074	0.245086	0.087	0.014	0.1402	0.013	1690	170	270	2229	40	160	748	39	43	1253	29	51	40.3033								Zircon	622	34	3.7	2.9	4600	390	424000
STO-02-03-19-c	Output_1_170	2.0445	36.9	3.1	0.416	0.02	0.49669	2.40385	0.11557	0.63	0.059	0.456699		3.1	0.122721	0.02		1.558	0.22	0.63	0.059	18970	740	1700	4577	36	140	2241	78	91	3691	57	81	39.2847								Zircon	311	17	2.8	2.3	1600	170	480000
STO-02-03-19-c	Output_1_171	9.1403	1.007	0.096	0.084	0.0026	0.308809	11.9048	0.368481	0.0848	0.0095	0.266313	0.680594	0.096	0.0815486	0.0026	0.220472	0.032	0.0047	0.0848	0.0095	637	48	92	1290	120	210	520.1	8.1	15	704	38	48	26.1222								Zircon	503	22	2.7	1.1	2240	240	488100
STO-02-03-19-c	Output_1_172	5.2918	7.06	0.8	0.1429	0.008	0.442942	6.9979	0.391765	0.345	0.036	0.472763		0.8	0.0828152	0.008		0.186	0.029	0.345	0.036	3450	300	490	3676	79	160	860	40	45	2108	86	100	59.203								Zircon	514	12	5.5	1.9	1896	43	452700
STO-02-03-19-c	Output_1_173	1.2628	24.6	4.9	0.294	0.04	0.56403	3.40136	0.46277	0.584	0.073	0.736389		4.9	0.0814158	0.04		0.55	0.12	0.584	0.073	8800	1200	1500	4470	130	180	1660	190	200	3280	180	190	49.3902								Zircon	561	34	7.4	4.1	2223	75	455000
STO-02-04-03-c	Output_1_180	12.363	0.658	0.047	0.06109	0.0018	0.381336	16.3693	0.482317	0.0753	0.0074	0.287193	0.705039	0.047	0.0616747	0.0018	0.401053	0.01803	0.0023	0.0753	0.0074	361.1	7.4	45	1093	74	200	382.2	5.4	11	512	16	29	25.3516								Zircon	309	13	6.2	1.4	1864	30	477300
STO-02-04-05-c	Output_1_182	7.6833	0.362	0.024	0.03484	0.00098	0.390574	28.7026	0.807365	0.0735	0.0072	0.275993	0.229977	0.024	0.0338161	0.00098	0.267575	0.01551	0.002	0.0735	0.0072	311	8.7	40	1020	72	200	220.8	2.4	6.1	313.4	9	18	29.5469								Zircon	885	35	4.2	1.9	3008	75	460500
STO-02-04-07-c	Output_1_184	11.977	2.14	0.16	0.1042	0.0032	0.379946	9.59693	0.294723	0.1432	0.014	0.299684		0.16	0.0869071	0.0032		0.0943	0.012	0.1432	0.014	1821	68	230	2273	64	180	639	11	19	1157	33	52	44.771								Zircon	243.2	9.5	9	1.7	820	16	469000
STO-02-04-13-c	Output_1_193	8.3612	1.903	0.12	0.04797	0.0014	0.42002	20.8464	0.608399	0.2772	0.026	0.297106		0.12	0.0297641	0.0014		0.076	0.0098	0.2772	0.026	1480	45	180	3345	37	150	302	4.4	8.8	1081	20	44	72.0629								Inclusion
STO-02-04-15-r	Output_1_196	30.585	0.409	0.035	0.0394	0.0021	0.528681	25.3807	1.35278	0.0735	0.0073	0.472859	0.363804	0.035	0.0391066	0.0021	0.487388	0.01339	0.0018	0.0735	0.0073	269	11	35	1032	81	200	249	12	13	345	19	25	27.8261								Inclusion
STO-02-05-04-r	Output_1_203	11.733	1.08	0.12	0.0902	0.003	0.286763	11.0865	0.36873	0.0848	0.011	0.248366	0.650906	0.12	0.0869265	0.003	0.184004	0.0376	0.0052	0.0848	0.011	745	44	100	1240	180	250	557	11	18	735	47	55	24.2177								Zircon	307	13	6.2	1.4	911	20	437000
STO-02-05-06-c	Output_1_205	8.7997	1.014	0.082	0.0756	0.0023	0.352116	13.2275	0.402424	0.094	0.0097	0.282789	0.730595	0.082	0.0735666	0.0023	0.268338	0.0279	0.0036	0.094	0.0097	556	20	71	1493	92	200	469.9	7.9	14	709	28	41	33.7236								Zircon	280	19	5.2	1.6	1397	37	467600
STO-02-05-10-r	Output_1_210	11.2	0.76	0.055	0.0651	0.0022	0.423114	15.361	0.519112	0.0824	0.008	0.328735	0.412827	0.055	0.0624188	0.0022	0.255755	0.0313	0.0041	0.0824	0.008	622	24	80	1259	62	180	406.5	8.2	13	577	18	30	29.5494								Zircon	502	18	4.3	1	2920	120	414000
STO-02-05-12-c	Output_1_212	30.666	0.803	0.058	0.0701	0.0024	0.428321	14.2653	0.488399	0.0831	0.0091	0.298402	0.171607	0.058	0.0649277	0.0024	0.108719	0.0352	0.005	0.0831	0.0091	697	46	97	1230	120	220	436.6	9.6	14	600	19	33	27.2333								Zircon	287	12	3	0.53	1550	110	428100
STO-02-06-01-c	Output_1_217	11.466	0.721	0.057	0.0411	0.0018	0.484587	24.3309	1.06559	0.1273	0.014	0.369971	0.141239	0.057	0.0362848	0.0018	0.122003	0.0289	0.004	0.1273	0.014	575	34	79	2040	100	190	259.5	9	11	550	22	33	52.8182								Zircon	247	16	3.1	1.1	1860	110	462200
STO-02-06-02-c	Output_1_218	27.999	2.92	0.52	0.0524	0.0057	0.521278	19.084	2.07593	0.384	0.042	0.705171	0.172601	0.52	0.0309144	0.0057	0.0610862	0.0888	0.015	0.384	0.042	1710	170	260	3809	91	170	328	34	35	1300	100	110	74.7692								Inclusion
STO-02-06-02-r	Output_1_219	31.465	0.7	0.12	0.0255	0.0029	0.552813	39.2157	4.45982	0.171	0.022	0.662297		0.12	0.0189375	0.0029		0.0254	0.0049	0.171	0.022	504	74	97	2650	120	170	162	18	18	507	67	72	68.0473								Inclusion
STO-02-06-03-c	Output_1_220	26.399	1.182	0.074	0.02296	0.00069	0.432749	43.554	1.3089	0.3712	0.034	0.311749		0.074	0.00860939	0.00069		0.1049	0.014	0.3712	0.034	2014	75	250	3792	28	150	146.3	2.3	4.4	791	12	35	81.5044								Inclusion
STO-02-06-03-r	Output_1_221	5.3331	1.167	0.08	0.02767	0.0011	0.501663	36.1402	1.43673	0.311	0.032	0.360398	0.102165	0.08	0.0186136	0.0011	0.075256	0.0703	0.0093	0.311	0.032	1373	59	180	3520	73	160	175.9	5.2	6.9	785	19	37	77.5924								Inclusion
STO-02-06-05-c	Output_1_223	10.666	2.322	0.15	0.05865	0.0017	0.409375	17.0503	0.494212	0.2892	0.027	0.296506	0.324227	0.15	0.0420649	0.0017	0.0870234	0.05338	0.0067	0.2892	0.027	1051	19	130	3411	37	150	367.4	4.6	10	1218	18	45	69.8358								Inclusion
STO-02-06-05-r	Output_1_224	3.4665	0.738	0.053	0.03955	0.0013	0.416176	25.2844	0.831094	0.1304	0.013	0.313128	0.147561	0.053	0.0348695	0.0013	0.103244	0.0384	0.005	0.1304	0.013	762	24	96	2136	90	240	250.1	4.8	7.9	561	18	31	55.4189								Inclusion
STO-02-06-06-c	Output_1_225	17.066	0.1451	0.0092	0.01607	0.00058	0.494701	62.2278	2.24593	0.0651	0.0065	0.339948	0.100635	0.0092	0.0157042	0.00058	0.374579	0.00786	0.001	0.0651	0.0065	158.1	7	21	757	83	210	102.8	2.5	3.7	137.5	3.2	8.2	25.2364								Inclusion
STO-02-06-06-r	Output_1_226	9.0663	0.1425	0.012	0.01303	0.00044	0.372189	76.746	2.59158	0.0777	0.0079	0.315196	0.0625819	0.012	0.0123827	0.00044	0.182211	0.00885	0.0013	0.0777	0.0079	178	14	26	1147	99	220	83.4	1.7	2.8	135.1	7.7	11	38.2679								Inclusion
STO-02-06-07-r	Output_1_227	32.799	3.38	0.4	0.0801	0.0026	0.264513	12.4844	0.405236	0.292	0.036	0.254606	0.498276	0.4	0.0578727	0.0026	0.0558767	0.0724	0.011	0.292	0.036	1410	110	200	3340	140	200	496.3	9.6	16	1435	81	93	65.4146								Zircon	215.5	9.9	14.6	1.8	1960	120	485600
STO-02-06-16-r	Output_1_228	33.332	0.1641	0.014	0.01375	0.00042	0.337082	72.7273	2.22149	0.0852	0.0089	0.28066	0.0889256	0.014	0.0131401	0.00042	0.198966	0.006	0.0008	0.0852	0.0089	120.9	5.7	16	1279	99	200	88	1.5	2.7	153.5	8.4	12	42.671								Inclusion
STO-02-06-17-c	Output_1_229	5.3331	1.482	0.097	0.1081	0.0036	0.453482	9.25069	0.308071	0.1015	0.01	0.320221	1.82508	0.097	0.110619	0.0036	0.522203	0.02856	0.0036	0.1015	0.01	569	12	71	1644	82	190	662	14	21	923	18	40	28.2774								Zircon	347	21	5.4	1.7	2059	32	508000
STO-02-06-17-r	Output_1_230	8.533	1.097	0.067	0.01948	0.00057	0.432064	51.3347	1.50209	0.4108	0.038	0.301595		0.067	0.00760358	0.00057		0.02782	0.0035	0.4108	0.038	554.5	6.4	69	3949	19	140	124.4	1.6	3.6	751.7	9.9	33	83.4508								Inclusion
STO-02-06-18-c	Output_1_231	13.066	0.222	0.016	0.02837	0.0011	0.473771	35.2485	1.3667	0.0571	0.0056	0.36766	0.269006	0.016	0.0287522	0.0011	0.540978	0.00757	0.00099	0.0571	0.0056	152.3	5.6	20	478	83	220	180.3	4.9	6.8	203.4	7.6	13	11.3569								Inclusion
STO-02-06-19-c	Output_1_233	7.9997	0.491	0.034	0.05074	0.0015	0.392633	19.7083	0.582627	0.0715	0.0072	0.281684	0.280785	0.034	0.0489277	0.0015	0.245437	0.02039	0.0027	0.0715	0.0072	408	16	53	990	110	240	319	4.3	9.1	405	13	23	21.2346								Zircon	249	10	3.4	1.3	2318	66	494000
STO-02-06-23-c	Output_1_236	30.366	2.137	0.15	0.0446	0.002	0.538374	22.4215	1.00545	0.3601	0.033	0.439532		0.15	0.0213207	0.002		0.1701	0.022	0.3601	0.033	3170	110	380	3747	23	140	281.3	9.9	12	1164	29	50	75.8333								Inclusion
STO-02-06-25-c	Output_1_238	6.6211	0.318	0.024	0.0197	0.00067	0.410846	50.7614	1.7264	0.1213	0.012	0.32511	0.0749091	0.024	0.0175662	0.00067	0.118213	0.0158	0.0021	0.1213	0.012	317	14	42	1972	57	180	125.8	2.8	4.2	280	12	19	55.0714								Inclusion
STO-02-07-01-c	Output_1_239	28.083	1.039	0.11	0.01989	0.00072	0.323528	50.2765	1.81997	0.38	0.042	0.311248		0.11	0.0108487	0.00072		0.0577	0.0077	0.38	0.042	1133	53	150	3778	94	170	126.9	3.1	4.5	708	42	51	82.0763								Inclusion
STO-02-07-02-c	Output_1_240	27.854	0.6352	0.038	0.06651	0.0018	0.412174	15.0353	0.40691	0.0706	0.0065	0.28202	0.667971	0.038	0.066681	0.0018	0.428695	0.02016	0.0025	0.0706	0.0065	403.5	6	50	951	26	200	415.1	3.4	11	499.1	5.3	24	16.8303								Zircon	423	19	3.48	0.73	3400	94	481200
STO-02-07-05-c	Output_1_243	11.365	0.2491	0.017	0.03061	0.001	0.431776	32.6691	1.06727	0.0611	0.0059	0.320475	0.175223	0.017	0.0299213	0.001	0.325696	0.01244	0.0016	0.0611	0.0059	249.9	6.4	32	634	70	210	194.4	3.9	6.3	225.7	7.6	14	13.868								Inclusion
STO-02-07-06-c	Output_1_244	4.9721	0.761	0.059	0.03471	0.0013	0.434986	28.8101	1.07903	0.1661	0.016	0.362383	0.08073	0.059	0.0287644	0.0013	0.0617222	0.0307	0.004	0.1661	0.016	612	22	78	2516	53	160	219.9	5.7	8	574	23	34	61.6899								Inclusion
STO-02-07-06-r	Output_1_245	8.5235	0.2181	0.015	0.02327	0.00079	0.442633	42.9738	1.45893	0.0704	0.0071	0.319033	0.161943	0.015	0.0227355	0.00079	0.351238	0.00977	0.0012	0.0704	0.0071	196.6	4.9	25	926	92	210	148.3	3.2	5	200.2	6.3	12	25.9241								Inclusion
STO-02-07-07-c	Output_1_246	10.299	1.553	0.12	0.0556	0.0024	0.487695	17.9856	0.776357	0.2101	0.02	0.412978	1.38988	0.12	0.0537847	0.0024	0.459136	0.0188	0.0025	0.2101	0.02	376	16	49	2913	40	150	348	12	15	949	29	47	63.3298								Inclusion
STO-02-07-08-c	Output_1_247	10.654	0.527	0.056	0.01811	0.00087	0.411947	55.2181	2.65266	0.217	0.024	0.3984		0.056	0.0132931	0.00087		0.0322	0.0047	0.217	0.024	640	49	93	2940	100	180	115.7	4.6	5.5	427	31	37	72.904								Inclusion
STO-02-07-08-r	Output_1_248	16.692	0.2123	0.014	0.01043	0.00032	0.421831	95.8773	2.94158	0.1546	0.015	0.301501	0.0461333	0.014	0.00894685	0.00032	0.11705	0.00986	0.0013	0.1546	0.015	198.3	6	25	2391	43	160	66.9	1.1	2	195.3	5.6	12	65.745								Inclusion
STO-02-07-09-c	Output_1_249	12.075	0.299	0.022	0.03625	0.0013	0.438128	27.5862	0.989298	0.0645	0.0067	0.326338	0.18223	0.022	0.0350848	0.0013	0.293409	0.01475	0.0019	0.0645	0.0067	295.8	9.5	38	730	110	220	230.6	5.1	7.9	268	11	19	13.9552								Inclusion
STO-02-07-09-r	Output_1_250	29.832	0.1294	0.0084	0.00964	0.00035	0.488139	103.734	3.76629	0.1048	0.01	0.355625	0.0480181	0.0084	0.00887146	0.00035	0.220002	0.00502	0.00064	0.1048	0.01	101.2	2.4	13	1709	50	170	61.8	1.6	2.2	123.4	3.2	7.5	49.919								Inclusion
STO-02-07-10-c	Output_1_251	31.253	0.844	0.067	0.035	0.0017	0.521912	28.5714	1.38776	0.1758	0.016	0.470825		0.067	0.0263953	0.0017		0.03	0.0041	0.1758	0.016	596	35	81	2605	35	150	221.9	8.7	10	616	25	37	63.9773								Inclusion
STO-02-07-11-c	Output_1_252	31.608	0.702	0.042	0.01646	0.00055	0.487604	60.7533	2.03003	0.3268	0.03	0.34204		0.042	0.00853789	0.00055		0.0796	0.01	0.3268	0.03	1547	44	190	3597	29	140	105.2	2.2	3.5	540.2	6.6	26	80.5257								Inclusion
STO-02-07-11-r	Output_1_253	32.318	0.286	0.023	0.00885	0.00028	0.366104	112.994	3.57496	0.245	0.025	0.296148		0.023	0.00593827	0.00028		0.0165	0.0023	0.245	0.025	331	21	46	3138	74	160	56.8	1	1.8	254	12	18	77.6378								Inclusion
STO-02-07-12-c	Output_1_254	13.851	0.479	0.031	0.0553	0.0018	0.449318	18.0832	0.588603	0.066	0.0062	0.3274	0.307466	0.031	0.0536867	0.0018	0.315548	0.02164	0.0028	0.066	0.0062	433	10	55	798	54	200	346.8	6.3	11	397.3	9.9	22	12.7108								Zircon	667	20	2.47	0.78	5299	90	430100
STO-02-07-12-r	Output_1_255	32.674	0.796	0.048	0.0561	0.0019	0.489695	17.8253	0.603709	0.1079	0.01	0.343236	0.634193	0.048	0.0544502	0.0019	0.418682	0.02148	0.0027	0.1079	0.01	429.5	6.4	54	1766	28	170	352	7.3	11	594	6.3	27	40.7407								Inclusion
STO-02-07-13-c	Output_1_256	33.384	0.672	0.066	0.00925	0.00073	0.626375	108.108	8.53177	0.5528	0.051	0.650036		0.066	0.000161503	0.00073		0.0407	0.0074	0.5528	0.051	820	110	150	4392	19	140	59.4	4.4	4.7	512	31	39	88.3984								Inclusion
STO-02-07-13-r	Output_1_257	11.01	0.461	0.035	0.02082	0.00067	0.390255	48.0307	1.54566	0.1674	0.016	0.319089		0.035	0.01649	0.00067		0.0325	0.0043	0.1674	0.016	647	26	84	2524	57	160	132.8	2.5	4.2	384	16	24	65.4167								Inclusion
STO-02-07-14-c	Output_1_258	7.4581	0.848	0.059	0.06433	0.0019	0.390755	15.5449	0.45912	0.1033	0.01	0.291819	0.417492	0.059	0.0602357	0.0019	0.217841	0.0348	0.0045	0.1033	0.01	691	19	87	1678	69	180	401.9	5.8	12	627	19	35	35.9011								Inclusion
STO-02-07-14-c	Output_1_259	4.9721	0.763	0.059	0.0754	0.0023	0.366963	13.2626	0.404562	0.0771	0.0083	0.272623	0.402752	0.059	0.0721434	0.0023	0.212652	0.0341	0.0044	0.0771	0.0083	678	25	87	1110	110	210	468.8	6.8	14	575	23	34	18.4696								Zircon	286	21	4.2	1.9	1845	66	447000
SOUTHWESTERN THOMSON OROGEN
WOL-01
Concordant-Autocrysts
WOL-04-01-01-c	Output_1_192	38.38	0.505	0.023	0.06771	0.0019	0.524551	14.7689	0.414427	0.054	0.0019	0.623511	0.532061	0.023	0.0679409	0.0019	0.543173	0.02046	0.001	0.054	0.0019	409.3	6.3	20	354	56	77	422.3	4.2	12	414.7	8.4	15	1.83265	422.3	12	0.505	0.023	0.06771	0.0019	0.524551	Zircon	1229	43	16.8	1.1	2790	150	433300
WOL-04-01-03-c	Output_1_196	38.64	0.542	0.026	0.06946	0.0019	0.495349	14.3968	0.393808	0.0564	0.0022	0.574151	0.572192	0.026	0.0697246	0.0019	0.514308	0.02032	0.0011	0.0564	0.0022	406.6	9.5	21	471	64	83	432.9	3.8	12	439	10	17	1.38952	432.9	12	0.542	0.026	0.06946	0.0019	0.495349	Zircon	1253	13	13.69	0.88	2188	59	435900
WOL-04-01-08-r	Output_1_202	37.602	0.538	0.024	0.06731	0.0018	0.514158	14.8566	0.397295	0.0577	0.002	0.610841	0.55785	0.024	0.0674954	0.0018	0.526864	0.0201	0.001	0.0577	0.002	402.2	7.8	20	521	50	72	419.9	3	11	437.4	8.4	16	4.00091	419.9	11	0.538	0.024	0.06731	0.0018	0.514158	Zircon	1194	22	11.21	0.72	2263	27	432100
WOL-04-01-09-r	Output_1_203	29.045	0.563	0.037	0.06962	0.002	0.400528	14.3637	0.412631	0.059	0.0033	0.456873	0.508187	0.037	0.0691454	0.002	0.369205	0.02322	0.0012	0.059	0.0033	464	12	25	560	110	130	433.9	5.1	12	460	19	24	5.67391	431.005	12	0.508187	0.037	0.0691454	0.002	0.369205	Zircon	856	36	18	1.1	1259	52	415000
WOL-04-01-10-r	Output_1_204	35.528	0.603	0.034	0.06572	0.0018	0.43693	15.2161	0.416752	0.0657	0.0031	0.502021	0.47355	0.034	0.0647222	0.0018	0.361201	0.02498	0.0013	0.0657	0.0031	499	10	25	817	82	97	410.3	3.6	11	479	16	21	14.3424	404.28	11	0.47355	0.034	0.0647222	0.0018	0.361201	Zircon	1403	24	15.5	1.1	2641	41	433900
WOL-04-01-10-c	Output_1_205	37.862	0.502	0.024	0.06589	0.0018	0.496125	15.1768	0.414604	0.0556	0.0021	0.586055	0.519141	0.024	0.066007	0.0018	0.508066	0.02033	0.00099	0.0556	0.0021	406.9	4.7	20	422	66	86	411.4	3.3	11	412	10	16	0.145631	411.4	11	0.502	0.024	0.06589	0.0018	0.496125	Zircon	846	13	16.89	0.93	2508	68	442600
WOL-04-01-14-c	Output_1_211	26.451	0.531	0.031	0.06801	0.0019	0.431657	14.7037	0.410779	0.0562	0.003	0.463691	0.508942	0.031	0.0678638	0.0019	0.417639	0.0217	0.0011	0.0562	0.003	434	10	23	440	100	120	424.2	4.4	12	431	16	21	1.57773	423.273	12	0.508942	0.031	0.0678638	0.0019	0.417639	Zircon	940	22	21.5	1.4	1792	82	450300
WOL-04-01-16-c	Output_1_214	40.196	0.505	0.024	0.06715	0.0019	0.511568	14.892	0.421368	0.0551	0.002	0.614798	0.498281	0.024	0.0670545	0.0019	0.507053	0.02135	0.0011	0.0551	0.002	427	10	22	409	63	85	418.9	4.1	11	415.5	9.3	16	0.818291	418.9	11	0.505	0.024	0.06715	0.0019	0.511568	Zircon	892	57	10.9	1.5	1700	150	431200
WOL-04-02-01-r	Output_1_215	12.188	0.549	0.03	0.06664	0.0019	0.46258	15.006	0.427842	0.061	0.003	0.501545	0.490881	0.03	0.0660708	0.0019	0.425763	0.0293	0.0028	0.061	0.003	583	49	56	642	88	100	415.8	5.6	12	444	14	20	6.35135	412.44	12	0.490881	0.03	0.0660708	0.0019	0.425763	Zircon	1158	25	3.72	0.99	2447	41	485000
WOL-04-02-04-r	Output_1_219	31.897	0.528	0.025	0.06642	0.0019	0.517109	15.0557	0.430681	0.0577	0.002	0.636511	0.523513	0.025	0.0663817	0.0019	0.514097	0.02093	0.0011	0.0577	0.002	418.5	8.8	21	504	58	81	414.6	4	11	429.7	9.2	16	3.51408	414.32	11	0.523513	0.025	0.0663817	0.0019	0.514097	Zircon	1326	29	4.8	0.55	2726	71	447800
WOL-04-02-07-r	Output_1_222	31.897	0.561	0.025	0.06637	0.0018	0.51988	15.0671	0.408629	0.0608	0.0021	0.617575	0.510637	0.025	0.0659965	0.0018	0.486666	0.02155	0.0011	0.0608	0.0021	430.9	7.3	21	649	53	75	414.2	3.9	11	451.8	9.1	17	8.32227	411.991	11	0.510637	0.025	0.0659965	0.0018	0.486666	Zircon	1388	51	15.5	1.2	3160	170	439500
WOL-04-02-08-r	Output_1_223	33.972	0.535	0.027	0.06444	0.0017	0.463261	15.5183	0.409391	0.0599	0.0025	0.534303	0.498136	0.027	0.064162	0.0017	0.439165	0.02138	0.0013	0.0599	0.0025	427	16	26	572	74	91	402.6	3.4	11	434	12	18	7.23502	400.887	11	0.498136	0.027	0.064162	0.0017	0.439165	Zircon	1012	51	15.6	1.7	1980	120	451200
WOL-04-02-09-r	Output_1_224	36.824	0.568	0.025	0.06523	0.0018	0.531187	15.3304	0.423036	0.0634	0.0021	0.640077	0.489246	0.025	0.0645672	0.0018	0.478928	0.02686	0.0015	0.0634	0.0021	536	16	30	722	46	69	407.3	3.4	11	457	9.1	17	10.8753	403.341	11	0.489246	0.025	0.0645672	0.0018	0.478928	Inclusion
WOL-04-02-10-c	Output_1_225	39.418	0.535	0.028	0.06515	0.0019	0.486761	15.3492	0.447636	0.0594	0.0025	0.569552	0.527695	0.028	0.0651036	0.0019	0.481928	0.02044	0.001	0.0594	0.0025	409	6.2	20	549	76	94	406.8	4.7	11	434	13	18	6.26728	406.589	11	0.527695	0.028	0.0651036	0.0019	0.481928	Zircon	868	33	19.8	1.1	2196	88	450600
WOL-04-02-11-r	Output_1_227	38.899	0.494	0.023	0.06388	0.0019	0.538356	15.6544	0.465612	0.0568	0.0019	0.66448	0.499297	0.023	0.0638738	0.0019	0.542474	0.01997	0.001	0.0568	0.0019	399.7	7.3	20	469	52	76	399.1	5.9	11	407	8.2	15	1.94103	399.1	11	0.494	0.023	0.06388	0.0019	0.538356	Zircon	622	19	6.61	0.7	1863	82	470000
WOL-04-02-12-r	Output_1_228	15.041	0.542	0.024	0.06857	0.002	0.550082	14.5836	0.425365	0.0576	0.002	0.6432	0.561763	0.024	0.0687129	0.002	0.56304	0.02096	0.0011	0.0576	0.002	419.2	8.5	21	507	57	79	427.5	5.7	12	439.2	8.9	16	2.66393	427.5	12	0.542	0.024	0.06857	0.002	0.550082	Zircon	487	24	4.47	0.55	2161	69	479000
WOL-04-02-13-r	Output_1_229	6.7425	0.562	0.038	0.0669	0.0024	0.468683	14.9477	0.53624	0.0623	0.0026	0.651868	0.518892	0.038	0.0664444	0.0024	0.442347	0.0305	0.0035	0.0623	0.0026	607	63	69	680	74	91	417.4	9.5	14	452	20	25	7.65487	414.699	14	0.518892	0.038	0.0664444	0.0024	0.442347	Zircon	1030	32	1.04	0.65	2332	74	497000
WOL-04-03-03-c	Output_1_236	40.714	0.5037	0.021	0.06551	0.0017	0.528432	15.2648	0.396126	0.05597	0.0016	0.672138	0.498352	0.021	0.0654528	0.0017	0.524702	0.02114	0.0011	0.05597	0.0016	422.9	6.6	21	453	33	62	409	2.6	11	414	5.1	14	1.20773	408.702	11	0.498352	0.021	0.0654528	0.0017	0.524702	Zircon	1224	19	2.53	0.4	2448	34	434800
WOL-04-03-05-r	Output_1_242	18.931	0.574	0.03	0.06486	0.0019	0.488928	15.4178	0.451648	0.0644	0.0027	0.572754	0.482452	0.03	0.0640944	0.0019	0.430326	0.0275	0.0018	0.0644	0.0027	548	25	35	742	70	87	405.1	5.3	12	463	12	19	12.5054	400.478	12	0.482452	0.03	0.0640944	0.0019	0.430326	Zircon	1303	82	3.68	0.71	2630	180	432600
WOL-04-03-06-r	Output_1_243	35.787	0.525	0.025	0.06729	0.002	0.529489	14.8611	0.441702	0.0569	0.002	0.645693	0.520528	0.025	0.0672313	0.002	0.526564	0.0214	0.0011	0.0569	0.002	427.9	8.9	22	473	53	76	419.8	5.5	12	429.4	9	16	2.23568	419.454	12	0.520528	0.025	0.0672313	0.002	0.526564	Zircon	1869	46	13.3	2.3	3270	200	457200
WOL-04-03-06-c	Output_1_244	42.789	0.531	0.025	0.06958	0.0019	0.501714	14.372	0.39245	0.0561	0.0021	0.589337	0.553406	0.025	0.0697066	0.0019	0.516616	0.02132	0.0011	0.0561	0.0021	426.3	6.7	21	449	63	83	433.6	3.3	11	432	10	17	0.37037	433.6	11	0.531	0.025	0.06958	0.0019	0.501714	Zircon	1103	66	14.44	0.94	2390	190	434600
WOL-04-03-08-c	Output_1_248	16.338	0.519	0.024	0.06522	0.0018	0.51249	15.3327	0.423166	0.0583	0.002	0.626834	0.49143	0.024	0.0649523	0.0018	0.493529	0.02079	0.001	0.0583	0.002	416	5.4	20	545	59	83	407.3	3.9	11	424.2	9.1	16	3.98397	405.673	11	0.49143	0.024	0.0649523	0.0018	0.493529	Zircon	828	43	9.3	1.1	3510	130	396000
WOL-04-03-10-c	Output_1_250	38.121	0.518	0.026	0.06788	0.0018	0.467125	14.7319	0.390651	0.0558	0.0022	0.558091	0.512974	0.026	0.0678059	0.0018	0.463969	0.02138	0.0011	0.0558	0.0022	428	11	23	429	69	88	423.3	3.5	11	424	10	17	0.165094	423.3	11	0.518	0.026	0.06788	0.0018	0.467125	Zircon	1580	48	9.69	0.69	3160	100	436100
WOL-04-04-01-c	Output_1_252	26.451	0.522	0.024	0.06835	0.0019	0.517393	14.6306	0.406702	0.0557	0.0019	0.631723	0.523255	0.024	0.0683383	0.0019	0.518368	0.02154	0.0012	0.0557	0.0019	431	14	24	436	56	80	426.2	3.8	11	426.2	8.7	16	0	426.2	11	0.522	0.024	0.06835	0.0019	0.517393	Zircon	739	32	2.43	0.45	1158	50	415500
WOL-04-04-04-r	Output_1_257	39.418	0.5034	0.021	0.06563	0.0018	0.549358	15.2369	0.417895	0.05636	0.0016	0.694811	0.496334	0.021	0.0655196	0.0018	0.544585	0.02208	0.0011	0.05636	0.0016	441.4	7	22	466	30	61	409.8	4.1	11	413.8	4.5	14	0.966651	409.106	11	0.496334	0.021	0.0655196	0.0018	0.544585	Zircon	1874	42	3.55	0.74	3410	160	446900
WOL-04-05-02-r	Output_1_261	43.567	0.5166	0.021	0.06695	0.0018	0.551649	14.9365	0.401579	0.05663	0.0016	0.689353	0.506387	0.021	0.0668176	0.0018	0.544751	0.0228	0.0012	0.05663	0.0016	455.7	9.5	23	483	29	62	417.8	3	11	423.9	4.8	14	1.43902	416.954	11	0.506387	0.021	0.0668176	0.0018	0.544751	Zircon	1523	36	3.79	0.43	2698	94	426500
WOL-04-05-06-r	Output_1_269	35.528	0.566	0.024	0.06598	0.0017	0.519285	15.1561	0.390503	0.06271	0.0018	0.667993	0.49385	0.024	0.0653529	0.0017	0.471913	0.02927	0.0015	0.06271	0.0018	583	14	30	701	35	65	411.9	2.1	10	455.3	6.8	16	9.53218	408.097	10	0.49385	0.024	0.0653529	0.0017	0.471913	Inclusion
WOL-04-05-09-r	Output_1_273	37.862	0.671	0.033	0.06833	0.0018	0.472168	14.6349	0.385522	0.0721	0.0029	0.547887	0.520737	0.033	0.0670324	0.0018	0.390153	0.0284	0.0017	0.0721	0.0029	565	21	33	974	63	80	426.1	2.2	11	520	13	20	18.0577	418.252	11	0.520737	0.033	0.0670324	0.0018	0.390153	Zircon	1304	24	7.22	0.61	2483	65	429100
WOL-04-05-10-r	Output_1_275	39.677	0.54	0.025	0.06843	0.0018	0.494003	14.6135	0.384396	0.0582	0.0022	0.571183	0.553873	0.025	0.068471	0.0018	0.503282	0.02118	0.0011	0.0582	0.0022	423.6	8	21	524	61	81	426.7	3.3	11	437.6	9.5	17	2.49086	426.7	11	0.54	0.025	0.06843	0.0018	0.494003	Zircon	1181	15	19.1	2	2067	59	435700
WOL-04-05-10-c	Output_1_276	40.196	0.559	0.025	0.06951	0.0018	0.501086	14.3864	0.372544	0.0591	0.0018	0.647753	0.533529	0.025	0.0692425	0.0018	0.485122	0.0284	0.0022	0.0591	0.0018	566	34	43	570	42	69	433.2	2.5	11	450.1	7.5	16	3.75472	431.591	11	0.533529	0.025	0.0692425	0.0018	0.485122	Zircon	1281	29	3.05	0.37	2130	100	437000
WOL-04-05-13-c	Output_1_281	30.86	0.559	0.027	0.06918	0.002	0.513578	14.455	0.417897	0.0587	0.0022	0.610776	0.548003	0.027	0.0690844	0.002	0.506602	0.02171	0.0011	0.0587	0.0022	434	6.2	21	556	62	83	431.2	4.8	12	452	10	18	4.60177	430.637	12	0.548003	0.027	0.0690844	0.002	0.506602	Zircon	358	10	7.84	0.73	2457	85	430200
WOL-04-05-14-r	Output_1_282	25.673	0.503	0.023	0.06751	0.0019	0.524167	14.8126	0.416886	0.0553	0.0019	0.633681	0.528718	0.023	0.0676265	0.0019	0.542536	0.02029	0.0011	0.0553	0.0019	405.9	9	21	425	49	72	421.1	4.5	11	415.1	8.5	15	1.44543	421.1	11	0.503	0.023	0.06751	0.0019	0.524167	Zircon	1242	42	7	1	2700	150	456700
Xenocryst
WOL-04-05-11-r	Output_1_279	10.632	0.62	0.036	0.07136	0.0021	0.452074	14.0135	0.412391	0.0631	0.0029	0.539244	0.5659	0.036	0.0709123	0.0021	0.422029	0.0258	0.0016	0.0631	0.0029	515	20	32	700	86	100	444.3	5.8	13	489	16	22	9.1411	441.65	13	0.5659	0.036	0.0709123	0.0021	0.422029	Zircon	1311	41	4.7	1	2350	36	462000
WOL-04-05-04-c	Output_1_265	26.192	0.529	0.025	0.07133	0.002	0.510252	14.0193	0.393084	0.0551	0.002	0.611318	0.546512	0.025	0.0713697	0.002	0.522373	0.02207	0.0012	0.0551	0.002	441.3	9.9	23	405	60	82	444.2	5.1	12	432	10	17	2.82407	444.402	12	0.546512	0.025	0.0713697	0.002	0.522373	Zircon	1063	62	7.26	0.86	2410	120	414000
WOL-04-02-10-r	Output_1_226	18.672	0.577	0.044	0.0724	0.0026	0.426051	13.8122	0.496017	0.059	0.0039	0.477378	0.597763	0.044	0.0724742	0.0026	0.438114	0.0223	0.0014	0.059	0.0039	446	17	27	550	130	140	451	11	16	469	26	29	3.83795	451	16	0.577	0.044	0.0724	0.0026	0.426051	Zircon	839	36	17.3	1.6	1449	74	421900
WOL-04-01-06-r	Output_1_200	40.714	0.917	0.066	0.105	0.0052	0.566854	9.52381	0.471655	0.0631	0.0022	0.817688	0.921185	0.066	0.105065	0.0052	0.568367	0.0315	0.0028	0.0631	0.0022	626	46	55	701	51	74	643	26	30	656	29	35	1.98171	643	30	0.917	0.066	0.105	0.0052	0.566854	Zircon	281	24	4.57	0.57	555	48	438200
WOL-04-01-04-c	Output_1_197	18.412	1.793	0.071	0.1734	0.0047	0.564844	5.76701	0.156315	0.07517	0.002	0.71364	1.74018	0.071	0.172961	0.0047	0.554325	0.05389	0.0026	0.07517	0.002	1060.9	7.2	49	1072	20	53	1031	7.4	26	1042.6	6.9	26	1.1126	1072	53	1.74018	0.071	0.172961	0.0047	0.554325	Zircon	376	19	15.3	1.2	3184	61	453900
Pb loss
WOL-04-04-03-c	Output_1_255	24.636	0.27	0.017	0.0364	0.0019	0.638224	27.4725	1.43401	0.0545	0.0023	0.777635	0.299539	0.017	0.0366175	0.0019	0.674758	0.01044	0.00057	0.0545	0.0023	210	5.9	11	400	76	93	230	11	12	242	11	13	4.95868	230	12	0.27	0.017	0.0364	0.0019	0.638224	Zircon	1187	37	13.3	1	2360	70	479700
WOL-04-05-11-c	Output_1_277	29.045	0.426	0.02	0.05519	0.0015	0.501012	18.1192	0.492459	0.0562	0.0019	0.626557	0.449881	0.02	0.0553749	0.0015	0.520336	0.01655	0.00082	0.0562	0.0019	331.7	5.1	16	458	55	79	346.3	2.9	9.2	360.2	8.1	14	3.85897	346.3	9.2	0.426	0.02	0.05519	0.0015	0.501012	Zircon	1774	42	17.01	0.95	3112	47	449600
WOL-04-01-12-c	Output_1_207	35.268	0.4561	0.019	0.0593	0.0016	0.543629	16.8634	0.454999	0.05589	0.0016	0.685874	0.539647	0.019	0.0599825	0.0016	0.60388	0.01066	0.00057	0.05589	0.0016	214.2	5.1	11	443	31	63	371.4	3	9.8	381.3	4.9	13	2.59638	371.4	9.8	0.4561	0.019	0.0593	0.0016	0.543629	Zircon	1909	34	5.05	0.51	3437	62	435000
WOL-04-05-07-c	Output_1_270	32.675	0.554	0.029	0.06114	0.0016	0.447161	16.3559	0.428025	0.0655	0.0027	0.535967	0.480359	0.029	0.0605512	0.0016	0.400964	0.02248	0.0014	0.0655	0.0027	449	17	27	788	70	87	382.5	2.8	10	446	14	18	14.2377	378.977	10	0.480359	0.029	0.0605512	0.0016	0.400964	Zircon	1811	70	7.77	0.7	3630	150	438200
WOL-04-03-09-r	Output_1_249	20.746	0.458	0.021	0.06123	0.0018	0.539736	16.3319	0.480114	0.0553	0.0021	0.612142	0.491146	0.021	0.0614315	0.0018	0.565289	0.01781	0.00091	0.0553	0.0021	356.8	7.2	18	423	62	82	383.1	5.4	11	385.6	8.4	15	0.64834	383.1	11	0.458	0.021	0.06123	0.0018	0.539736	Zircon	1570	100	7.76	0.91	3220	190	442600
WOL-04-03-01-r	Output_1_231	24.117	0.483	0.021	0.0615	0.0021	0.617652	16.2602	0.555225	0.0573	0.0017	0.754869	0.524727	0.021	0.0618214	0.0021	0.647108	0.0162	0.0019	0.0573	0.0017	325	34	38	507	32	58	384.8	8.6	13	399.8	7.5	14	3.75188	384.8	13	0.483	0.021	0.0615	0.0021	0.617652	Inclusion
WOL-04-01-12-r	Output_1_208	8.8171	0.546	0.06	0.0634	0.0026	0.349633	15.7729	0.646837	0.0649	0.0067	0.369179	0.452078	0.06	0.0624548	0.0026	0.29929	0.0248	0.0025	0.0649	0.0067	496	43	49	720	210	220	396	12	16	440	37	40	10	390.537	16	0.452078	0.06	0.0624548	0.0026	0.29929	Zircon	495	55	3.88	0.95	439	36	410700
WOL-04-01-13-r	Output_1_210	6.7425	0.472	0.029	0.06288	0.0017	0.40276	15.9033	0.429956	0.0542	0.0024	0.521104	0.479592	0.029	0.0629614	0.0017	0.407727	0.0185	0.0011	0.0542	0.0024	370	14	22	372	82	99	393.1	3.9	11	392	16	20	0.280612	393.1	11	0.472	0.029	0.06288	0.0017	0.40276	Inclusion
WOL-04-05-01-c	Output_1_260	39.936	0.574	0.034	0.06375	0.0017	0.410513	15.6863	0.418301	0.0661	0.0037	0.430085	0.481724	0.034	0.0629362	0.0017	0.357427	0.02383	0.0014	0.0661	0.0037	476	17	29	781	95	110	398.4	3.8	11	463	16	21	13.9525	393.458	11	0.481724	0.034	0.0629362	0.0017	0.357427	Zircon	1312	70	10.54	0.95	2630	150	427000
Discordant
WOL-04-01-01-r	Output_1_191	30.601	1.128	0.064	0.06636	0.0019	0.45052	15.0693	0.43146	0.1223	0.0053	0.551243	0.393147	0.064	0.0604062	0.0019	0.189709	0.051	0.0041	0.1223	0.0053	1005	64	79	1983	63	77	414.2	5	11	763	23	30	45.7143								Zircon	1370	28	10.39	0.87	2860	68	455700
WOL-04-01-02-c	Output_1_193	16.338	1.03	0.087	0.092	0.0029	0.349635	10.8696	0.342628	0.0814	0.0063	0.377196	0.658743	0.087	0.0889718	0.0029	0.239609	0.035	0.0023	0.0814	0.0063	696	32	46	1210	140	150	567.6	9.3	17	720	37	42	21.1667								Zircon	255	11	6.37	0.93	568.4	8.9	472100
WOL-04-01-02-c	Output_1_194	7.0018	3.13	0.23	0.0869	0.0037	0.501347	11.5075	0.489962	0.254	0.013	0.639535	0.260525	0.23	0.0642854	0.0037	0.0650565	0.1275	0.0097	0.254	0.013	2420	140	170	3203	74	83	537	17	22	1437	50	58	62.6305								Zircon	536	25	5.8	1.2	905	40	413700
WOL-04-01-03-r	Output_1_195	27.229	0.659	0.057	0.02828	0.00086	0.331682	35.3607	1.07533	0.167	0.011	0.419166	0.255663	0.057	0.0249785	0.00086	0.152619	0.026	0.0025	0.167	0.011	519	43	49	2500	100	110	179.8	2.8	5.4	508	29	33	64.6063								Inclusion
WOL-04-01-04-r	Output_1_198	17.116	1.2	0.081	0.0613	0.0023	0.485845	16.3132	0.612078	0.1447	0.0068	0.623938	0.330205	0.081	0.0539592	0.0023	0.171199	0.093	0.013	0.1447	0.0068	1790	210	230	2270	70	81	383.7	9.7	14	803	33	41	52.2167								Zircon	1592	85	9.9	1.3	3510	220	471900
WOL-04-01-05-r	Output_1_199	7.0018	0.899	0.073	0.0532	0.003	0.570404	18.797	1.05998	0.1241	0.0078	0.667811	0.339463	0.073	0.0484892	0.003	0.276488	0.0433	0.0037	0.1241	0.0078	856	60	72	2000	100	110	334	16	18	660	30	34	49.3939								Zircon	1748	89	13.8	2.4	3200	410	423700
WOL-04-01-07-r	Output_1_201	38.899	0.413	0.029	0.0131	0.00048	0.462623	76.3359	2.79704	0.221	0.011	0.592841	0.0728181	0.029	0.0103561	0.00048	0.115602	0.0194	0.0017	0.221	0.011	388	28	34	2967	72	82	83.9	2	3	341	17	20	75.3959								Inclusion
WOL-04-01-11-r	Output_1_206	16.856	1.51	0.084	0.06783	0.0019	0.449737	14.7427	0.412962	0.1624	0.0066	0.567504	0.454538	0.084	0.0591057	0.0019	0.171373	0.1078	0.0069	0.1624	0.0066	2067	87	130	2473	55	69	423	5.3	12	938	22	31	54.9041								Zircon	1004	26	23.2	3.9	1880	35	429300
WOL-04-01-13-r	Output_1_209	19.968	0.4026	0.016	0.04981	0.0013	0.548931	20.0763	0.523975	0.05864	0.0017	0.669075	0.431385	0.016	0.0500485	0.0013	0.573639	0.01431	0.00083	0.05864	0.0017	287.2	9.7	17	564	35	69	313.3	2.8	8.2	343.4	4.3	12	8.76529								Inclusion
WOL-04-01-14-c	Output_1_212	2.3339	4.3	0.4	0.069	0.0046	0.582519	14.4927	0.966184	0.458	0.032	0.690332	0.263331	0.4	0.0354532	0.0046	0.085107	0.236	0.019	0.458	0.032	4280	250	310	4108	98	100	430	26	28	1691	70	78	74.5713								Inclusion
WOL-04-01-15-r	Output_1_213	35.528	1.634	0.098	0.07393	0.0021	0.428035	13.5263	0.384218	0.1611	0.0082	0.487313	0.4493	0.098	0.0641791	0.0021	0.148355	0.0646	0.0063	0.1611	0.0082	1260	100	120	2456	74	84	459.8	5	13	976	29	37	52.8893								Zircon	1564	56	18.2	2.2	2880	180	434300
WOL-04-02-02-r	Output_1_216	11.151	5.39	0.4	0.1022	0.0036	0.428804	9.78474	0.344668	0.385	0.02	0.561224	0.331169	0.4	0.0610964	0.0036	0.048726	0.373	0.027	0.385	0.02	6400	310	400	3842	68	77	627	15	21	1887	59	67	66.7727								Zircon	1756	55	11.6	1.3	3610	120	483100
WOL-04-02-02-r	Output_1_217	13.226	2.19	0.17	0.0748	0.0024	0.381992	13.369	0.428951	0.21	0.016	0.388112	0.449142	0.17	0.0607723	0.0024	0.103774	0.0962	0.0083	0.21	0.016	1850	130	150	2928	99	100	465	8.6	14	1172	48	55	60.3242								Zircon	1561	54	15.2	1.4	2870	130	424600
WOL-04-02-03-r	Output_1_218	8.2985	1	0.12	0.0731	0.0022	0.243264	13.6799	0.411707	0.101	0.012	0.245551	0.562732	0.12	0.0693787	0.0022	0.147085	0.034	0.0033	0.101	0.012	675	56	64	1600	210	210	454.9	7.6	13	697	56	59	34.7346								Zircon	1227	33	8.3	1.8	2250	52	390600
WOL-04-02-05-r	Output_1_220	32.157	1.079	0.046	0.06067	0.0017	0.549247	16.4826	0.46185	0.1291	0.0041	0.6616	0.452175	0.046	0.0555076	0.0017	0.288274	0.053	0.0028	0.1291	0.0041	1043	23	53	2085	36	57	379.7	4	10	745.5	9.8	23	49.0677								Zircon	1252	27	8.27	0.81	3212	89	482900
WOL-04-02-06-r	Output_1_221	36.565	6.31	0.67	0.1178	0.0061	0.438336	8.48896	0.439581	0.399	0.023	0.668273	0.448607	0.67	0.0694769	0.0061	0.0586855	0.1082	0.011	0.399	0.023	2060	180	200	3878	79	87	717	31	35	2010	91	97	64.3284								Zircon	883	23	12.32	0.7	3003	81	431700
WOL-04-02-13-r	Output_1_230	22.561	1.221	0.073	0.06852	0.0019	0.420747	14.5943	0.404687	0.1291	0.006	0.512372	0.53876	0.073	0.062941	0.0019	0.217457	0.0665	0.004	0.1291	0.006	1301	46	75	2067	71	84	427.2	3.7	11	806	26	34	46.9975								Zircon	1168	40	6.94	0.93	2102	43	414700
WOL-04-03-01-r	Output_1_232	10.114	0.326	0.046	0.03743	0.0011	0.203897	26.7165	0.785151	0.0648	0.0081	0.228865	0.549893	0.046	0.0392236	0.0011	0.317861	0.008	0.0012	0.0648	0.0081	161	23	24	810	250	260	236.9	3.4	6.7	284	31	33	16.5845								Inclusion
WOL-04-03-01-c	Output_1_233	4.9272	0.406	0.021	0.0493	0.002	0.61714	20.284	0.822879	0.0616	0.0022	0.75058	0.472893	0.021	0.0497497	0.002	0.671125	0.01207	0.00086	0.0616	0.0022	242	13	17	659	58	79	310.4	9.5	12	345.6	9.6	15	10.1852								Inclusion
WOL-04-03-02-r	Output_1_234	41.233	0.1283	0.0071	0.00759	0.00026	0.526333	131.752	4.51325	0.127	0.0081	0.473166	0.0676047	0.0071	0.00703979	0.00026	0.331752	0.00542	0.00033	0.127	0.0081	109.2	4.2	6.7	2007	98	110	48.8	1.1	1.7	122.4	4.5	6.3	60.1307								Inclusion
WOL-04-03-02-c	Output_1_235	38.38	0.788	0.037	0.0688	0.0022	0.562885	14.5349	0.464778	0.0838	0.0035	0.607905	0.50118	0.037	0.0663945	0.0022	0.409478	0.02984	0.0015	0.0838	0.0035	594	11	30	1269	66	81	429	7.5	13	589	11	21	27.1647								Zircon	978	24	14.2	1.6	1763	42	428400
WOL-04-03-03-r	Output_1_237	17.894	1.74	0.12	0.0591	0.002	0.440517	16.9205	0.572605	0.219	0.016	0.420299	0.303377	0.12	0.046908	0.002	0.107171	0.1575	0.011	0.219	0.016	2950	140	200	2940	110	120	370.2	8	12	1017	37	47	63.5988								Zircon	1883	68	11.5	1.2	4460	220	501100
WOL-04-03-03-r	Output_1_238	9.0765	5.4	0.27	0.0837	0.0027	0.542127	11.9474	0.385401	0.48	0.02	0.612173		0.27	0.0385117	0.0027		0.394	0.021	0.48	0.02	6710	150	310	4178	49	61	518	9.2	16	1884	25	42	72.5053								Zircon	1720	88	13.3	1.7	3910	290	455000
WOL-04-03-04-r	Output_1_239	40.974	0.629	0.029	0.03552	0.00098	0.513498	28.1532	0.776748	0.1298	0.0043	0.639959	0.295138	0.029	0.0326869	0.00098	0.291842	0.031	0.0019	0.1298	0.0043	616	25	38	2096	40	61	225	2.1	6	496	10	18	54.6371								Inclusion
WOL-04-03-04-c	Output_1_240	27.229	1.419	0.061	0.05264	0.0015	0.552507	18.997	0.541327	0.1988	0.0062	0.674531	0.408828	0.061	0.0441036	0.0015	0.222243	0.0588	0.003	0.1988	0.0062	1155	24	58	2812	32	52	330.7	3.3	9	898	11	25	63.1737								Zircon	1867	38	6.71	0.92	3679	75	342600
WOL-04-03-05-r	Output_1_241	10.114	1.44	0.14	0.072	0.0021	0.287348	13.8889	0.405093	0.147	0.013	0.313213	0.494122	0.14	0.0641036	0.0021	0.114857	0.0866	0.0085	0.147	0.013	1680	140	160	2270	150	160	448.2	6.4	13	901	54	57	50.2553								Zircon	1450	170	8.6	1.4	2790	370	487000
WOL-04-03-07-r	Output_1_245	22.043	0.2887	0.013	0.02911	0.00081	0.525673	34.3525	0.955874	0.0731	0.0024	0.646548	0.292626	0.013	0.0291046	0.00081	0.530888	0.00922	0.00063	0.0731	0.0024	185.6	9	13	1011	45	66	185	2.3	5.1	257.4	5.1	10	28.1274								Inclusion
WOL-04-03-07-c	Output_1_246	22.561	0.249	0.02	0.0277	0.0014	0.532578	36.1011	1.8246	0.0673	0.0035	0.696938	0.318732	0.02	0.0282165	0.0014	0.620245	0.00772	0.00062	0.0673	0.0035	155	10	12	824	82	92	176.4	7.3	8.8	225	14	16	21.6								Inclusion
WOL-04-03-08-r	Output_1_247	32.416	0.586	0.03	0.06204	0.0017	0.471901	16.1186	0.441678	0.0696	0.003	0.536488	0.507203	0.03	0.0613171	0.0017	0.424423	0.02129	0.0011	0.0696	0.003	425.7	9.2	22	912	71	87	388	4	11	467	12	19	16.9165								Zircon	1239	54	12.68	0.83	4439	96	465400
WOL-04-03-10-r	Output_1_251	39.677	0.853	0.043	0.0672	0.0021	0.526886	14.881	0.46503	0.093	0.0039	0.59753	0.470739	0.043	0.0639954	0.0021	0.338085	0.0451	0.0032	0.093	0.0039	890	46	62	1471	62	77	419.1	6.7	13	624	15	24	32.8365								Zircon	1443	43	6.49	0.79	2711	71	444400
WOL-04-04-01-r	Output_1_253	4.4086	0.344	0.03	0.03896	0.0011	0.308011	25.6673	0.724694	0.0655	0.0052	0.335081	0.311535	0.03	0.0386262	0.0011	0.28359	0.014	0.0018	0.0655	0.0052	282	33	35	780	150	160	246.4	2.6	6.6	300	20	22	17.8667								Inclusion
WOL-04-04-02-r	Output_1_254	41.233	0.25	0.024	0.01262	0.00058	0.431805	79.2393	3.64174	0.161	0.02	0.346983	0.112205	0.024	0.011208	0.00058	0.235153	0.0129	0.0017	0.161	0.02	259	31	33	2150	210	220	80.8	3	3.7	228	19	20	64.5614								Inclusion
WOL-04-04-03-r	Output_1_256	32.935	0.445	0.028	0.04006	0.0014	0.48555	24.9626	0.872381	0.0818	0.0051	0.488956	0.37504	0.028	0.0394238	0.0014	0.429537	0.016	0.0015	0.0818	0.0051	321	25	29	1210	110	120	253.2	5.8	8.4	372	15	19	31.9355								Inclusion
WOL-04-04-05-r	Output_1_258	37.343	0.694	0.055	0.06951	0.0018	0.310594	14.3864	0.372544	0.0743	0.0056	0.324935	0.530158	0.055	0.0680215	0.0018	0.247162	0.0574	0.0098	0.0743	0.0056	1110	180	180	1030	140	150	433.2	2.4	11	537	29	32	19.3296								Zircon	1671	33	1.78	0.33	2920	100	429500
WOL-04-05-01-r	Output_1_259	38.38	0.402	0.019	0.02466	0.00074	0.536001	40.5515	1.21687	0.1217	0.005	0.589821	0.223342	0.019	0.0230679	0.00074	0.352834	0.016	0.00088	0.1217	0.005	320.8	9.3	18	1960	59	75	157.1	2.4	4.7	342.6	7.5	14	54.1448								Inclusion
WOL-04-05-03-c	Output_1_262	9.8544	0.495	0.03	0.05348	0.0015	0.419994	18.6986	0.524455	0.0683	0.0037	0.459778	0.486877	0.03	0.0533435	0.0015	0.415171	0.01807	0.0013	0.0683	0.0037	362	19	25	860	100	110	335.9	3.6	9.1	408	15	20	17.6716								Zircon	1460	140	4.1	1.1	1950	190	394600
WOL-04-05-03-r	Output_1_263	35.787	0.3341	0.016	0.03156	0.0011	0.588451	31.6857	1.10438	0.0787	0.0025	0.739089	0.272947	0.016	0.0309815	0.0011	0.518069	0.01388	0.00095	0.0787	0.0025	278	14	19	1163	42	64	200.3	4.8	7	292.3	7.1	12	31.4745								Inclusion
WOL-04-05-04-r	Output_1_264	28.526	1.212	0.067	0.07224	0.0019	0.429629	13.8428	0.364081	0.1229	0.0054	0.51361	0.462693	0.067	0.0660115	0.0019	0.194957	0.0558	0.0035	0.1229	0.0054	1097	43	66	1979	65	78	449.6	3.3	12	803	22	31	44.01								Zircon	1433	21	14.3	1.2	2956	28	446600
WOL-04-05-04-c	Output_1_266	3.6306	12.4	2.4	0.142	0.013	0.427585	7.04225	0.644713	0.639	0.068	0.652167		2.4	0.0325773	0.013		0.195	0.011	0.639	0.068	3600	110	190	4590	160	170	858	75	76	2610	170	180	67.1264								Inclusion
WOL-04-05-05-r	Output_1_267	17.634	0.1297	0.006	0.01474	0.00043	0.533406	67.8426	1.97913	0.0649	0.002	0.687466	0.140209	0.006	0.0148103	0.00043	0.561442	0.00437	0.00023	0.0649	0.002	88.1	2.1	4.7	773	42	69	94.4	1.4	2.8	123.8	2.9	5.4	23.748								Inclusion
WOL-04-05-05-r	Output_1_268	4.4086	1.002	0.1	0.02043	0.00082	0.373128	48.9476	1.96461	0.363	0.027	0.47489	0.10361	0.1	0.0127297	0.00082	0.0665933	0.0371	0.0035	0.363	0.027	735	60	69	3750	110	120	130.4	4.2	5.2	702	48	53	81.4245								Inclusion
WOL-04-05-07-r	Output_1_271	36.565	0.819	0.048	0.04141	0.0011	0.412819	24.1488	0.641479	0.1429	0.0074	0.456419	0.34049	0.048	0.0374656	0.0011	0.203894	0.03	0.002	0.1429	0.0074	597	29	40	2254	79	90	261.6	2.3	6.9	604	21	26	56.6887								Inclusion
WOL-04-05-08-r	Output_1_272	40.196	0.705	0.045	0.03554	0.0012	0.467591	28.1373	0.95005	0.1505	0.0094	0.475555	0.285888	0.045	0.0317828	0.0012	0.233251	0.0478	0.0041	0.1505	0.0094	942	65	78	2304	96	100	225.1	4.2	7.2	537	24	27	58.0819								Inclusion
WOL-04-05-09-c	Output_1_274	38.64	1.197	0.091	0.07709	0.0022	0.35144	12.9718	0.370192	0.117	0.0067	0.446033	0.363268	0.091	0.0699044	0.0022	0.124653	0.0444	0.0041	0.117	0.0067	876	69	80	1953	85	94	478.7	5.9	13	835	30	34	42.6707								Zircon	1335	98	6.58	0.63	2944	88	429500
WOL-04-05-11-c	Output_1_278	4.1492	2.65	0.38	0.0671	0.0043	0.408008	14.9031	0.955044	0.302	0.021	0.677686	0.546852	0.38	0.0486721	0.0043	0.126123	0.096	0.015	0.302	0.021	1860	260	270	3470	100	110	419	24	26	1346	76	79	68.8707								Inclusion
WOL-04-05-12-r	Output_1_280	43.048	1.254	0.055	0.0803	0.0023	0.546783	12.4533	0.356695	0.115	0.0036	0.675045	0.644673	0.055	0.0751784	0.0023	0.337553	0.0677	0.0035	0.115	0.0036	1324	26	66	1875	34	55	497.9	6	14	824	12	25	39.5752								Zircon	1422	28	7.75	0.6	2728	62	430000
WOL-04-05-14-r	Output_1_283	8.8171	6.9	0.5	0.0959	0.0039	0.489406	10.4275	0.42406	0.528	0.024	0.666772		0.5	0.0393438	0.0039		0.436	0.028	0.528	0.024	7300	270	390	4316	56	66	590	18	23	2093	53	63	71.8108								Inclusion
WOL-04-05-15-r	Output_1_284	43.826	0.1319	0.0064	0.01242	0.0008	0.798734	80.5153	5.18617	0.0801	0.0046	0.746414	0.110173	0.0064	0.0121934	0.0008	0.748707	0.00503	0.00029	0.0801	0.0046	101.3	3.5	5.9	1190	100	110	79.5	4.7	5.1	125.7	3.4	5.7	36.7542								Inclusion
ROS-01
Concordant-Autocrysts
ROS-03-01-02-c	Output_1_233	20.108	0.532	0.035	0.06748	0.0027	0.519626	14.8192	0.592944	0.0581	0.004	0.502476	0.526771	0.035	0.0673688	0.0027	0.516507	0.02142	0.0016	0.0581	0.004	428.4	6.5	32	524	52	150	420.9	3.7	17	433.9	8.7	23	2.99608	420.284	17	0.526771	0.035	0.0673688	0.0027	0.516507	Zircon	1948	73	12.2	1.3	4682	80	472200
ROS-03-02-02-c	Output_1_245	21.544	0.515	0.034	0.06663	0.0027	0.523113	15.0083	0.608169	0.0568	0.0039	0.508258	0.517455	0.034	0.0665961	0.0027	0.525114	0.02129	0.0018	0.0568	0.0039	426	18	36	475	57	150	415.8	3.8	16	421.5	9.4	23	1.35231	415.8	16	0.515	0.034	0.06663	0.0027	0.523113	Zircon	1086	53	3.57	0.56	1837	83	407900
ROS-03-03-01-r	Output_1_251	14.722	0.556	0.04	0.0647	0.0028	0.515469	15.4559	0.668882	0.0621	0.0047	0.496385	0.467199	0.04	0.0639892	0.0028	0.455093	0.0228	0.0017	0.0621	0.0047	455.7	8.1	34	681	83	160	404.3	7.3	17	448	14	26	9.75446	399.84	17	0.467199	0.04	0.0639892	0.0028	0.455093	Zircon	1451	57	15.1	1.8	3120	120	469400
ROS-03-03-02-c	Output_1_254	30.162	0.571	0.036	0.0687	0.0029	0.556351	14.556	0.614447	0.0604	0.0042	0.518924	0.475743	0.036	0.0679118	0.0029	0.491462	0.02344	0.0017	0.0604	0.0042	468.3	9.8	34	613	57	150	428.5	7.1	18	458.5	7.1	24	6.54308	423.563	18	0.475743	0.036	0.0679118	0.0029	0.491462	Zircon	375	23	6.9	1	2020	150	432400
ROS-03-03-12-c	Output_1_270	19.031	0.51	0.035	0.06822	0.0028	0.513274	14.6585	0.601637	0.0553	0.004	0.493514	0.551486	0.035	0.0684788	0.0028	0.541598	0.02011	0.0015	0.0553	0.004	402.4	9.6	30	410	71	160	425.4	3.6	17	418	11	24	1.77033	425.4	17	0.51	0.035	0.06822	0.0028	0.513274	Inclusion
ROS-03-03-18-r	Output_1_279	21.903	0.511	0.038	0.06483	0.0027	0.488635	15.425	0.642409	0.0577	0.0043	0.487839	0.498923	0.038	0.0646936	0.0027	0.480548	0.02142	0.0017	0.0577	0.0043	428	13	33	514	87	170	404.9	5.3	16	420	14	24	3.59524	404.106	16	0.498923	0.038	0.0646936	0.0027	0.480548	Zircon	763	53	3.42	0.87	1776	83	435500
ROS-03-03-21-r	Output_1_287	2.8725	13.4	2.5	0.42	0.095	0.77144	2.38095	0.538549	0.242	0.051	0.731648	1.1186	2.5	0.329861	0.095	0.127805	0.37	0.16	0.242	0.051	6100	2400	2500	3090	290	310	2240	410	430	2690	160	170	16.7286	3090	310	13.4	2.5	0.42	0.095	0.77144	Zircon	1170	360	-2.35	0.4	234	32	42400
ROS-03-04-01-c	Output_1_288	14.004	0.556	0.041	0.07074	0.003	0.49854	14.1363	0.599503	0.056	0.0041	0.501228	0.59409	0.041	0.0711343	0.003	0.521442	0.02105	0.0016	0.056	0.0041	421.1	9.5	32	483	87	190	440.6	6	18	448	15	27	1.65179	440.6	18	0.556	0.041	0.07074	0.003	0.49854	Zircon	1089	41	11.9	1.7	2485	75	407300
ROS-03-04-02-c	Output_1_289	33.752	0.536	0.035	0.0697	0.0029	0.537365	14.3472	0.596942	0.0565	0.0039	0.516237	0.541457	0.035	0.0696895	0.0029	0.541297	0.02179	0.0016	0.0565	0.0039	435.7	8.1	32	474	52	150	434.2	6	18	437.7	8.2	23	0.799634	434.2	18	0.536	0.035	0.0697	0.0029	0.537365	Zircon	1306	28	9.45	0.77	2367	90	441600
ROS-03-04-03-c	Output_1_290	29.084	0.531	0.036	0.06867	0.0028	0.515395	14.5624	0.593778	0.0562	0.004	0.497091	0.533022	0.036	0.0686794	0.0028	0.516782	0.02131	0.0016	0.0562	0.004	426	10	32	475	63	160	428.1	3.9	17	432	10	24	0.902778	428.1	17	0.531	0.036	0.06867	0.0028	0.515395	Zircon	677	42	6.08	0.6	1120	99	436400
ROS-03-04-04-c	Output_1_291	33.393	0.522	0.034	0.06929	0.0028	0.527192	14.4321	0.583199	0.0553	0.0038	0.506914	0.498394	0.034	0.0690466	0.0028	0.510979	0.0226	0.0017	0.0553	0.0038	451.7	7.4	33	426	56	150	431.9	3.5	17	425.8	8.3	23	1.4326	431.9	17	0.522	0.034	0.06929	0.0028	0.527192	Zircon	557	12	8.03	0.59	1206	20	428200
ROS-03-04-06-c	Output_1_294	35.189	0.485	0.034	0.06525	0.0027	0.508317	15.3257	0.634166	0.0544	0.0039	0.499895	0.512677	0.034	0.0654428	0.0027	0.528233	0.01971	0.0015	0.0544	0.0039	394.4	7	29	366	71	160	407.5	3.8	16	403	10	22	1.11663	407.5	16	0.485	0.034	0.06525	0.0027	0.508317	Zircon	1390	22	18.45	0.93	2510	68	458000
ROS-03-04-07-c	Output_1_295	7.5404	0.64	0.19	0.06449	0.0027	0.139644	15.5063	0.649201	0.077	0.03	0.106843	0.59745	0.19	0.063776	0.0027	0.131959	0.0227	0.0032	0.077	0.03	453	55	64	610	270	270	402.9	5.4	17	485	96	99	16.9278	398.548	17	0.59745	0.19	0.063776	0.0027	0.131959	Zircon	438	21	5.5	1.3	1300	100	491000
ROS-03-05-01-c	Output_1_296	37.343	0.503	0.035	0.06763	0.0028	0.511334	14.7863	0.61218	0.054	0.004	0.487888	0.502511	0.035	0.0676234	0.0028	0.511004	0.0211	0.0015	0.054	0.004	421.9	5.2	30	344	79	160	421.9	4	16	413	11	24	2.15496	421.822	16	0.502511	0.035	0.0676234	0.0028	0.511004	Zircon	334.1	9.2	12.79	0.92	1994	76	427900
ROS-03-05-04-r	Output_1_302	12.926	0.604	0.051	0.07333	0.003	0.43603	13.637	0.557902	0.0602	0.0053	0.421411	0.530065	0.051	0.0726891	0.003	0.394216	0.0243	0.0021	0.0602	0.0053	486	23	42	580	130	190	456.2	5.7	18	478	22	32	4.56067	452.337	18	0.530065	0.051	0.0726891	0.003	0.394216	Zircon	166.9	7.8	5.05	0.94	1069	45	480100
ROS-03-05-06-r	Output_1_305	5.7451	0.582	0.045	0.06767	0.0027	0.458576	14.7776	0.589619	0.0621	0.005	0.444022	0.50057	0.045	0.0670254	0.0027	0.408924	0.0276	0.0025	0.0621	0.005	549	31	50	670	110	180	422.1	3.4	16	471	15	24	10.3822	418.21	16	0.50057	0.045	0.0670254	0.0027	0.408924	Zircon	982	15	2.49	0.6	2448	59	464800
ROS-03-06-06-r	Output_1_321	9.3358	0.516	0.036	0.0638	0.0028	0.532461	15.674	0.687886	0.0585	0.0043	0.512644	0.514562	0.036	0.0638015	0.0028	0.531388	0.01991	0.0015	0.0585	0.0043	399	10	30	565	68	140	399	7.7	17	422	11	24	5.45024	398.703	17	0.514562	0.036	0.0638015	0.0028	0.531388	Zircon	1169	49	6.1	1.2	2709	99	494000
ROS-03-06-07-c	Output_1_323	17.594	0.519	0.034	0.06703	0.0027	0.523779	14.9187	0.600932	0.0566	0.0038	0.514475	0.548525	0.034	0.0672405	0.0027	0.543698	0.02017	0.0015	0.0566	0.0038	403.5	6.6	29	470	42	150	418.2	3.8	16	424.4	7.4	22	1.46089	418.2	16	0.519	0.034	0.06703	0.0027	0.523779	Zircon	1072	85	4.17	0.56	2840	180	459900
ROS-03-06-09-c	Output_1_328	23.339	0.57	0.044	0.06844	0.0028	0.468289	14.6113	0.597775	0.0605	0.0047	0.465964	0.533275	0.044	0.0681335	0.0028	0.445835	0.02257	0.0018	0.0605	0.0047	451	14	35	590	94	170	426.7	4.6	17	456	17	28	6.42544	424.901	17	0.533275	0.044	0.0681335	0.0028	0.445835	Zircon	1204	61	10.2	1	2330	120	428700
ROS-03-06-09-r	Output_1_329	36.625	0.488	0.032	0.06449	0.0026	0.523751	15.5063	0.625156	0.055	0.0038	0.503995	0.495142	0.032	0.0645418	0.0026	0.528974	0.01983	0.0015	0.055	0.0038	396.8	6.4	29	411	52	150	402.8	3.5	16	403.3	7.3	22	0.123977	402.8	16	0.488	0.032	0.06449	0.0026	0.523751	Zircon	1337	54	9.39	0.73	2582	63	443000
ROS-03-06-11-r	Output_1_331	16.158	0.524	0.035	0.0647	0.003	0.570256	15.4559	0.716659	0.0586	0.0043	0.534185	0.510299	0.035	0.0645996	0.003	0.560663	0.02074	0.0016	0.0586	0.0043	415	13	32	587	73	150	403.8	8.7	18	427.6	9.2	23	5.56595	403.537	18	0.510299	0.035	0.0645996	0.003	0.560663	Zircon	1965	77	9.4	1.4	3276	70	394500
ROS-03-06-16-r	Output_1_337	14.004	0.56	0.042	0.06847	0.0028	0.478714	14.6049	0.597252	0.0594	0.0045	0.475012	0.543028	0.042	0.0683265	0.0028	0.46818	0.0227	0.0019	0.0594	0.0045	453	21	37	566	91	170	426.9	4.7	17	451	16	27	5.34368	426.066	17	0.543028	0.042	0.0683265	0.0028	0.46818	Zircon	885	29	5.4	1.1	1494	42	413000
ROS-03-06-21-c	Output_1_342	20.108	0.545	0.043	0.0704	0.003	0.475219	14.2045	0.605307	0.0552	0.0044	0.471463	0.501258	0.043	0.0701189	0.003	0.446315	0.02295	0.0018	0.0552	0.0044	459	12	35	450	110	190	438.6	6.5	18	443	18	27	0.993228	438.6	18	0.545	0.043	0.0704	0.003	0.475219	Zircon	1201	24	18.5	2.5	1927	33	420600
Xenocryst
ROS-03-04-05-c	Output_1_292	33.034	3.05	0.25	0.225	0.013	0.576141	4.44444	0.25679	0.0973	0.0065	0.654162	2.31981	0.25	0.219682	0.013	0.481322	0.08382	0.0061	0.0973	0.0065	1627	18	110	1582	33	130	1305	47	66	1406	42	63	7.1835	1582	130	2.31981	0.25	0.219682	0.013	0.481322	Zircon	375	11	8.6	1.7	1245	91	457900
ROS-03-03-20-c	Output_1_285	3.2316	3.6	1	0.213	0.033	0.487104	4.69484	0.727369	0.118	0.039	0.424442		1	0.185939	0.033		0.162	0.039	0.118	0.039	3020	640	680	1710	700	720	1360	290	300	1510	210	220	9.93377	1710	720	3.6	1	0.213	0.033	0.487104	Zircon	1630	280	9	12	830	140	94000
Pb loss
ROS-03-03-12-c	Output_1_269	14.722	0.36	0.025	0.0406	0.0022	0.615177	24.6305	1.33466	0.0646	0.0044	0.622577	0.286795	0.025	0.0399798	0.0022	0.533804	0.02504	0.0019	0.0646	0.0044	500	14	37	766	47	130	256.8	7.6	13	311.9	9	19	17.6659	252.708	13	0.286795	0.025	0.0399798	0.0022	0.533804	Zircon	990	47	14.7	1.1	2546	97	472800
ROS-03-01-05-r	Output_1_239	34.83	0.466	0.031	0.0581	0.003	0.61316	17.2117	0.888728	0.05877	0.0038	0.624017	0.588989	0.031	0.0590756	0.003	0.694345	0.0123	0.0014	0.05877	0.0038	247	22	28	558.2	8.9	140	364	11	18	387.9	9.3	22	6.16138	364	18	0.466	0.031	0.0581	0.003	0.61316	Inclusion
ROS-03-03-02-r	Output_1_253	35.189	0.513	0.033	0.0604	0.0026	0.556143	16.5563	0.712688	0.0617	0.0041	0.543687	0.479777	0.033	0.0601216	0.0026	0.532272	0.01942	0.0015	0.0617	0.0041	388.7	8.5	29	661	38	140	378	7.2	16	420.4	7.3	22	10.0856	376.365	16	0.479777	0.033	0.0601216	0.0026	0.532272	Zircon	368	20	9.08	0.82	2328	84	433600
ROS-03-03-07-r	Output_1_261	23.339	0.519	0.036	0.06187	0.0025	0.503359	16.1629	0.6531	0.061	0.0044	0.488731	0.478772	0.036	0.0615298	0.0025	0.475392	0.02023	0.0015	0.061	0.0044	404.8	6.5	29	663	76	160	387	3.6	15	428	11	24	9.57944	384.922	15	0.478772	0.036	0.0615298	0.0025	0.475392	Zircon	444	22	5.38	0.67	2355	36	398900
Discordant
ROS-03-01-01-r	Output_1_230	37.343	2.081	0.14	0.0484	0.0022	0.559842	20.6612	0.939144	0.326	0.024	0.525356	0.50912	0.14	0.0346158	0.0022	0.225185	0.04063	0.003	0.326	0.024	805	14	59	3576	57	110	304.5	6.9	14	1140	17	45	73.2895								Inclusion
ROS-03-01-01-c	Output_1_231	34.111	0.989	0.093	0.0521	0.0025	0.45453	19.1939	0.92101	0.14	0.015	0.408737	0.470311	0.093	0.0476801	0.0025	0.256301	0.0336	0.0037	0.14	0.015	668	54	73	2110	140	180	327.1	8.9	16	687	36	48	52.3872								Zircon	1592	88	35.3	6.4	3700	360	448800
ROS-03-01-02-r	Output_1_232	33.752	1.148	0.11	0.0449	0.0021	0.438649	22.2717	1.04166	0.184	0.021	0.379194	0.394993	0.11	0.0387356	0.0021	0.191086	0.0393	0.0034	0.184	0.021	778	37	67	2640	150	180	283.1	6.7	13	768	40	51	63.138								Inclusion
ROS-03-01-03-c	Output_1_234	14.363	0.733	0.054	0.04046	0.0018	0.516941	24.7158	1.09956	0.1325	0.011	0.472337	0.519942	0.054	0.0386417	0.0018	0.409238	0.01768	0.0014	0.1325	0.011	354.2	9.7	27	2132	84	140	255.7	4.2	11	557	17	31	54.0934								Inclusion
ROS-03-01-03-c	Output_1_235	12.567	2	0.21	0.0613	0.0031	0.433923	16.3132	0.824975	0.24	0.022	0.48305	0.432642	0.21	0.0481774	0.0031	0.131415	0.1086	0.012	0.24	0.022	2130	200	230	3120	110	150	383	10	19	1119	61	73	65.773								Inclusion
ROS-03-01-03-r	Output_1_236	36.625	1.368	0.12	0.0223	0.0017	0.655961	44.843	3.41853	0.4508	0.029	0.76425		0.12	0.01025	0.0017		0.0406	0.005	0.4508	0.029	803	78	96	4092	15	96	141.9	9	10	865	34	50	83.5954								Inclusion
ROS-03-01-04-r	Output_1_237	36.625	1.373	0.11	0.04023	0.0018	0.487587	24.8571	1.11217	0.25	0.022	0.453222	0.407936	0.11	0.0321035	0.0018	0.203577	0.027	0.0027	0.25	0.022	537	37	53	3123	99	140	254.2	4.8	11	870	28	45	70.7816								Inclusion
ROS-03-01-04-c	Output_1_238	34.83	0.548	0.036	0.00839	0.00037	0.557362	119.189	5.25627	0.475	0.031	0.559887	0.098439	0.036	0.00458958	0.00037	0.215273	0.00678	0.00051	0.475	0.031	136.6	3.3	10	4165	11	95	53.8	1.1	2.4	443	8.9	24	87.8555								Inclusion
ROS-03-01-06-c	Output_1_240	15.44	0.661	0.044	0.05775	0.0024	0.529585	17.316	0.719627	0.0833	0.0058	0.512515	0.611932	0.044	0.0573293	0.0024	0.503151	0.01966	0.0015	0.0833	0.0058	394	12	30	1283	51	130	361.9	4.6	15	515	11	27	29.7282								Zircon	1270	27	12	1.4	2568	70	431500
ROS-03-01-07-r	Output_1_241	34.83	1.041	0.091	0.0298	0.0028	0.732142	33.557	3.15301	0.271	0.021	0.771478	0.167096	0.091	0.0219037	0.0028	0.228518	0.0393	0.0043	0.271	0.021	777	65	85	3282	69	120	189	16	18	719	34	47	73.7135								Inclusion
ROS-03-01-07-c	Output_1_242	30.162	0.714	0.057	0.0666	0.0039	0.591463	15.015	0.879258	0.0793	0.0052	0.666082	0.782025	0.057	0.0670445	0.0039	0.623781	0.0191	0.0017	0.0793	0.0052	382	20	34	1185	23	120	416	18	24	547	21	34	23.9488								Zircon	892	25	19.8	1.4	2198	63	427200
ROS-03-02-01-c	Output_1_243	39.138	1.353	0.088	0.0354	0.0022	0.69084	28.2486	1.75556	0.291	0.026	0.571017	0.304318	0.088	0.0261126	0.0022	0.279721	0.046	0.0039	0.291	0.026	908	41	75	3350	100	150	224	10	14	867	14	38	74.1638								Inclusion
ROS-03-02-02-c	Output_1_244	5.7451	0.676	0.045	0.0395	0.0018	0.564879	25.3165	1.15366	0.1231	0.0089	0.533216	0.419056	0.045	0.0374134	0.0018	0.408868	0.02275	0.0019	0.1231	0.0089	455	18	37	1999	59	130	249.8	4.8	11	524	11	27	52.3282								Zircon	1087	42	22.1	3.1	2118	61	421000
ROS-03-02-03-c	Output_1_246	25.494	0.609	0.059	0.0127	0.0012	0.698214	78.7402	7.44001	0.359	0.024	0.816337	0.0717318	0.059	0.00801667	0.0012	0.179049	0.0199	0.0022	0.359	0.024	398	35	44	3748	23	97	81.1	7.3	7.8	478	29	37	83.0335								Inclusion
ROS-03-02-04-c	Output_1_247	30.521	2.46	0.29	0.0599	0.0069	0.698887	16.6945	1.92307	0.306	0.024	0.82659	0.854698	0.29	0.0461376	0.0069	0.403326	0.0874	0.009	0.306	0.024	1690	120	170	3494	68	120	373	39	42	1218	56	65	69.376								Inclusion
ROS-03-02-04-r	Output_1_248	35.548	1.492	0.13	0.0363	0.0033	0.721948	27.5482	2.50438	0.3049	0.021	0.797073	0.113199	0.13	0.0245469	0.0033	0.116268	0.0492	0.0061	0.3049	0.021	966	95	120	3493	36	110	230	18	20	915	36	52	74.8634								Inclusion
ROS-03-02-05-c	Output_1_249	36.625	1.772	0.14	0.0538	0.0024	0.49167	18.5874	0.829176	0.239	0.021	0.452698	0.83556	0.14	0.0460681	0.0024	0.296908	0.03057	0.0024	0.239	0.021	608	18	47	3103	98	140	337.9	6.6	14	1027	31	49	67.0983								Zircon	623	30	10.2	0.77	1573	73	424500
ROS-03-02-05-r	Output_1_250	34.47	0.732	0.064	0.0264	0.0026	0.747825	37.8788	3.73049	0.1998	0.014	0.814813	0.423589	0.064	0.0238636	0.0026	0.584898	0.0114	0.0014	0.1998	0.014	229	23	30	2815	54	120	168	15	16	555	27	37	69.7297								Inclusion
ROS-03-03-01-r	Output_1_252	9.6948	1.723	0.12	0.0629	0.0043	0.7005	15.8983	1.08684	0.202	0.02	0.568182	0.331703	0.12	0.0512307	0.0043	0.226007	0.0663	0.0058	0.202	0.02	1298	60	110	2850	120	150	393	22	26	1016	21	45	61.3189								Zircon	1840	120	26.3	4.4	3460	190	440000
ROS-03-03-03-r	Output_1_255	26.212	1.676	0.13	0.05534	0.0023	0.472294	18.0701	0.751017	0.221	0.017	0.475351	0.447634	0.13	0.0451272	0.0023	0.172855	0.0445	0.0036	0.221	0.017	880	34	70	3000	76	130	347.2	4.5	14	994	30	49	65.0704								Zircon	1636	34	21.1	2.2	3680	110	462200
ROS-03-03-03-r	Output_1_256	3.9497	8.9	2.6	0.236	0.036	0.462862	4.23729	0.646366	0.278	0.069	0.523607	1.9532	2.6	0.182204	0.036	0.14682	0.265	0.045	0.278	0.069	4740	630	720	3270	410	420	1360	180	190	2280	250	250	40.3509								Zircon	1470	230	7	9.8	477	82	46430
ROS-03-03-04-r	Output_1_257	16.876	1.269	0.086	0.0592	0.0026	0.543843	16.8919	0.741874	0.1586	0.011	0.53499	0.554326	0.086	0.0531085	0.0026	0.300929	0.02744	0.002	0.1586	0.011	547	10	40	2444	43	110	370.6	7.5	16	831	17	38	55.4031								Inclusion
ROS-03-03-05-r	Output_1_258	24.776	1.015	0.078	0.05817	0.0025	0.48811	17.191	0.738826	0.1234	0.0098	0.475942	0.479806	0.078	0.0539723	0.0025	0.274025	0.037	0.0035	0.1234	0.0098	734	45	68	1984	73	120	364.5	5.4	15	703	21	34	48.1508								Zircon	1783	81	14.2	1.6	3930	110	431600
ROS-03-03-05-r	Output_1_259	5.7451	5.7	1.5	0.167	0.035	0.62298	5.98802	1.25497	0.266	0.062	0.668623	0.0839943	1.5	0.119683	0.035	0.0163733	0.34	0.12	0.266	0.062	5700	1700	1700	3160	370	380	990	190	190	1960	270	270	49.4898								Zircon	1550	310	16	17	930	140	127000
ROS-03-03-06-r	Output_1_260	31.598	1.191	0.097	0.0546	0.0025	0.49006	18.315	0.8386	0.162	0.017	0.399917	0.746889	0.097	0.0507036	0.0025	0.354934	0.0283	0.0024	0.162	0.017	563	25	47	2400	120	150	342.9	7.2	15	790	30	44	56.5949								Zircon	1327	73	11.4	1.4	2870	100	451800
ROS-03-03-08-r	Output_1_262	36.266	1.71	0.21	0.0526	0.0029	0.409561	19.0114	1.04816	0.229	0.024	0.46557	0.466423	0.21	0.0427395	0.0029	0.149023	0.0463	0.0054	0.229	0.024	912	81	100	2970	130	170	330	12	18	976	65	74	66.1885								Inclusion
ROS-03-03-09-r	Output_1_263	14.363	0.919	0.071	0.0711	0.0031	0.491485	14.0647	0.613229	0.0951	0.0078	0.46939	0.501328	0.071	0.0675738	0.0031	0.308163	0.0421	0.0037	0.0951	0.0078	833	41	71	1551	86	140	442.8	7.8	19	660	23	38	32.9091								Zircon	1950	180	8.6	1.4	3700	430	451300
ROS-03-03-09-r	Output_1_264	3.5907	6.23	0.64	0.164	0.034	0.896029	6.09756	1.26413	0.322	0.069	0.695324	0.918309	0.64	0.114122	0.034	0.393072	0.377	0.047	0.322	0.069	6460	580	1200	3520	350	370	980	180	180	2005	75	92	51.1222								Inclusion
ROS-03-03-10-r	Output_1_265	23.339	0.954	0.069	0.0433	0.0028	0.666517	23.0947	1.49342	0.163	0.015	0.574941	0.449989	0.069	0.0389634	0.0028	0.424364	0.0241	0.0021	0.163	0.015	481	23	41	2430	120	160	273	13	17	678	20	36	59.7345								Inclusion
ROS-03-03-10-c	Output_1_266	8.9767	0.658	0.047	0.05876	0.0024	0.496393	17.0184	0.695101	0.0815	0.0057	0.5043	0.503403	0.047	0.0574701	0.0024	0.408305	0.02406	0.0018	0.0815	0.0057	480.5	9.1	36	1230	56	140	368.1	4	15	513	15	29	28.2456								Zircon	1150	28	11.6	3.4	2900	46	508600
ROS-03-03-11-c	Output_1_267	37.343	0.588	0.039	0.0507	0.0036	0.730776	19.7239	1.40051	0.0961	0.011	0.527144	0.376229	0.039	0.0482589	0.0036	0.58411	0.02155	0.0016	0.0961	0.011	430.9	8.1	32	1460	170	200	319	19	22	468.9	9.9	25	31.9684								Zircon	441	30	11.5	1.2	2641	65	469900
ROS-03-03-12-r	Output_1_268	36.984	1.457	0.11	0.0558	0.0025	0.510338	17.9212	0.802919	0.187	0.016	0.463885	0.476443	0.11	0.0478682	0.0025	0.220635	0.0646	0.0056	0.187	0.016	1263	63	110	2720	96	140	350.1	6.8	15	907	26	45	61.4002								Inclusion
ROS-03-03-13-c	Output_1_271	14.722	0.867	0.059	0.03759	0.0019	0.596274	26.6028	1.34465	0.1679	0.013	0.546643	0.566087	0.059	0.0350636	0.0019	0.46129	0.01727	0.0015	0.1679	0.013	346	16	30	2539	70	130	237.8	6	12	633	14	32	62.4329								Zircon	1426	29	56.1	5	3230	130	469800
ROS-03-03-13-c	Output_1_272	7.8995	2.56	0.33	0.0633	0.0075	0.676715	15.7978	1.87178	0.314	0.038	0.699581	0.491743	0.33	0.0448248	0.0075	0.24192	0.055	0.012	0.314	0.038	1080	220	230	3510	160	190	395	43	45	1279	86	97	69.1165								Zircon	1840	210	48	19	1870	550	115000
ROS-03-03-14-c	Output_1_273	9.6948	1.44	0.24	0.0719	0.0037	0.29502	13.9082	0.715721	0.143	0.02	0.345309	0.410135	0.24	0.063657	0.0037	0.0988416	0.067	0.0092	0.143	0.02	1310	180	200	2250	230	260	448	15	22	887	91	98	49.4927								Zircon	1249	32	8.7	1.8	2709	49	461800
ROS-03-03-14-c	Output_1_274	8.6176	0.679	0.054	0.0617	0.0031	0.534103	16.2075	0.814313	0.0804	0.0078	0.459878	0.497293	0.054	0.0601669	0.0031	0.428677	0.0262	0.0022	0.0804	0.0078	523	22	43	1180	140	190	386	12	19	525	21	32	26.4762								Zircon	998	38	8.4	2	2228	72	421900
ROS-03-03-15-c	Output_1_275	33.752	0.802	0.059	0.01946	0.00095	0.552927	51.3875	2.50864	0.299	0.02	0.589522	0.0943197	0.059	0.0135251	0.00095	0.111587	0.0282	0.0031	0.299	0.02	561	45	60	3458	34	110	124.2	3.3	6	595	19	33	79.1261								Inclusion
ROS-03-03-15-r	Output_1_276	36.625	1.705	0.13	0.0279	0.0017	0.624288	35.8423	2.18394	0.4448	0.029	0.682801	0.0162966	0.13	0.0137462	0.0017	0.0155013	0.0576	0.0059	0.4448	0.029	1129	82	110	4067	11	97	177.3	8.4	11	1007	28	48	82.3932								Inclusion
ROS-03-03-16-r	Output_1_277	18.312	13.5	2.2	0.289	0.04	0.647349	3.46021	0.478921	0.331	0.032	0.819813		2.2	0.166694	0.04		0.6	0.14	0.331	0.032	9000	1600	1700	3580	120	160	1650	200	210	2610	160	180	36.7816								Inclusion
ROS-03-03-17-r	Output_1_278	17.594	0.946	0.072	0.0461	0.0022	0.531228	21.692	1.03519	0.1533	0.012	0.520543	0.466374	0.072	0.0418943	0.0022	0.322029	0.0322	0.004	0.1533	0.012	640	65	78	2383	77	140	290.5	7.2	14	681	26	43	57.3421								Zircon	1915	50	13.8	2.1	3447	91	444700
ROS-03-03-19-r	Output_1_280	21.903	1.484	0.1	0.04363	0.002	0.56246	22.92	1.05065	0.2495	0.017	0.558201	0.462187	0.1	0.0350195	0.002	0.255218	0.0426	0.0037	0.2495	0.017	842	38	71	3183	38	110	275.3	5.7	12	922	19	41	70.141								Inclusion
ROS-03-03-19-r	Output_1_281	8.2586	4.58	0.63	0.1139	0.011	0.574611	8.77963	0.847901	0.286	0.029	0.689677	0.805625	0.63	0.08436	0.011	0.164473	0.158	0.024	0.286	0.029	3040	340	390	3380	120	160	711	50	64	1730	100	110	58.9017								Inclusion
ROS-03-03-20-r	Output_1_282	16.158	0.975	0.089	0.0423	0.0035	0.671599	23.6407	1.95608	0.175	0.026	0.486553	0.758774	0.089	0.0401302	0.0035	0.59669	0.01744	0.0016	0.175	0.026	349	19	31	2570	220	240	267	18	21	687	32	43	61.1354								Zircon	1459	89	29.5	8.8	3340	150	451000
ROS-03-03-20-r	Output_1_283	6.1041	17.8	4.8	0.34	0.05	0.478777	2.94118	0.432526	0.329	0.078	0.527116	2.18008	4.8	0.244225	0.05	0.0925849	0.387	0.088	0.329	0.078	6900	1100	1100	3620	370	380	1880	230	240	2880	280	280	34.7222								Inclusion
ROS-03-03-20-c	Output_1_284	28.007	0.655	0.046	0.0493	0.0042	0.771618	20.284	1.72805	0.104	0.011	0.627284	0.662709	0.046	0.0489367	0.0042	0.777535	0.0162	0.0019	0.104	0.011	325	30	38	1620	150	190	309	23	26	512	13	27	39.6484								Zircon	1425	77	13.5	1.6	3290	320	457900
ROS-03-03-21-r	Output_1_286	17.235	1.01	0.17	0.0583	0.0028	0.274388	17.1527	0.823798	0.137	0.026	0.245334	0.716946	0.17	0.0551379	0.0028	0.209415	0.0271	0.0038	0.137	0.026	541	62	74	2010	290	310	365.5	9.9	17	687	76	82	46.7977								Inclusion
ROS-03-04-05-r	Output_1_293	35.189	0.978	0.062	0.089	0.004	0.578354	11.236	0.504987	0.0797	0.0054	0.552778	0.861817	0.062	0.0880596	0.004	0.533886	0.0355	0.003	0.0797	0.0054	705	31	58	1178	45	140	549	11	23	691.8	9.5	32	20.6418								Zircon	1178	27	6.92	0.66	2280	110	440700
ROS-03-05-02-r	Output_1_297	5.7451	1.142	0.082	0.0842	0.0044	0.588433	11.8765	0.620624	0.0971	0.007	0.5869	1.58463	0.082	0.0879272	0.0044	0.695161	0.01537	0.0013	0.0971	0.007	308	12	25	1567	63	140	521	18	26	773	20	38	32.6003								Zircon	757	35	14.5	2.4	1584	67	477000
ROS-03-05-02-r	Output_1_298	10.772	1.546	0.1	0.1122	0.005	0.567338	8.91266	0.397177	0.1002	0.0069	0.543297	1.95683	0.1	0.115474	0.005	0.646453	0.02548	0.0021	0.1002	0.0069	508	19	41	1636	41	120	685	13	29	948	15	41	27.7426								Zircon	746	15	17.1	1.6	1489	45	452300
ROS-03-05-02-r	Output_1_299	8.6176	0.7	0.047	0.049	0.0024	0.589339	20.4082	0.999583	0.103	0.0085	0.510391	0.775783	0.047	0.0496637	0.0024	0.623576	0.01368	0.0012	0.103	0.0085	275	11	23	1667	97	150	308.6	7.7	15	539	13	28	42.7458								Zircon	1105	30	59.5	9.8	1757	46	395700
ROS-03-05-02-c	Output_1_300	38.42	3.343	0.22	0.2324	0.01	0.547251	4.30293	0.185152	0.1054	0.0069	0.549262	3.27244	0.22	0.231614	0.01	0.540378	0.0751	0.0059	0.1054	0.0069	1462	49	110	1718	23	120	1346	26	54	1490	21	52	9.66443								Zircon	788	34	6.81	0.65	1406	42	425300
ROS-03-05-03-c	Output_1_301	37.702	1.178	0.12	0.05524	0.0023	0.378348	18.1028	0.753738	0.155	0.016	0.37407	0.677976	0.12	0.0510979	0.0023	0.246462	0.0265	0.003	0.155	0.016	527	46	59	2260	160	200	346.6	3	14	772	45	58	55.1036								Zircon	1454	36	28.2	3.4	3910	270	406700
ROS-03-05-04-r	Output_1_303	6.1041	1.92	0.42	0.0808	0.0045	0.246726	12.3762	0.689271	0.17	0.031	0.292094	0.722524	0.42	0.0712562	0.0045	0.108005	0.0456	0.0062	0.17	0.031	900	100	120	2470	310	330	501	19	27	1060	140	140	52.7358								Zircon	193	11	5.01	0.93	1130	44	459400
ROS-03-05-05-c	Output_1_304	23.339	0.851	0.058	0.04893	0.002	0.514326	20.4374	0.835371	0.1273	0.0091	0.49638	0.60638	0.058	0.0468443	0.002	0.407602	0.0237	0.0022	0.1273	0.0091	473	27	43	2059	55	130	307.9	2.5	12	624	14	32	50.6571								Zircon	1825	72	27	3.3	3170	99	403700
ROS-03-05-06-r	Output_1_306	8.9767	1.209	0.11	0.06819	0.0029	0.423449	14.6649	0.623672	0.128	0.013	0.386244	0.453808	0.11	0.0620464	0.0029	0.189336	0.0854	0.0077	0.128	0.013	1656	85	140	2080	140	170	425.2	5.3	17	802	39	52	46.9825								Zircon	1396	85	7.2	1.8	2820	180	452600
ROS-03-05-07-c	Output_1_307	12.926	0.517	0.034	0.03255	0.0015	0.573865	30.722	1.41576	0.1157	0.0082	0.545118	0.871739	0.034	0.0354906	0.0015	0.734899	0.00723	0.00055	0.1157	0.0082	145.7	3	11	1885	55	130	206.5	5.1	9.2	422.9	8.6	23	51.1705								Zircon	908	25	24.9	2.2	2062	80	473000
ROS-03-05-07-c	Output_1_308	12.567	1.276	0.11	0.0358	0.0021	0.562563	27.933	1.63853	0.2582	0.018	0.643835	0.60627	0.11	0.0302419	0.0021	0.357438	0.0189	0.002	0.2582	0.018	378	29	40	3232	40	110	226.9	9.4	13	832	34	49	72.7284								Zircon	1418	49	37.8	4	2527	97	410500
ROS-03-05-07-r	Output_1_309	35.189	1.732	0.12	0.0347	0.0021	0.657859	28.8184	1.74406	0.3698	0.024	0.68199	0.407369	0.12	0.0233633	0.0021	0.29185	0.0305	0.0025	0.3698	0.024	609	23	48	3791	21	100	220	10	13	1019	24	46	78.4102								Inclusion
ROS-03-06-01-c	Output_1_310	12.567	1.06	0.099	0.04319	0.0019	0.426118	23.1535	1.01856	0.181	0.018	0.404546	0.253329	0.099	0.0363533	0.0019	0.132559	0.0305	0.0026	0.181	0.018	607	26	51	2630	130	170	272.6	4.1	11	730	37	49	62.6575								Zircon	1333	74	6.9	1.1	3115	57	383600
ROS-03-06-01-r	Output_1_311	37.702	0.834	0.065	0.0653	0.0031	0.52021	15.3139	0.727001	0.0938	0.0084	0.468374	0.471132	0.065	0.0622367	0.0031	0.339577	0.0304	0.0025	0.0938	0.0084	604	24	49	1500	110	160	408	11	19	611	23	37	33.2242								Zircon	183.6	6.3	7.1	1.1	553	17	463100
ROS-03-06-02-r	Output_1_312	34.47	1.428	0.094	0.0623	0.0026	0.535451	16.0514	0.66988	0.1648	0.012	0.497258	0.451012	0.094	0.0543727	0.0026	0.223621	0.0726	0.0055	0.1648	0.012	1416	34	100	2504	45	120	389.5	5.8	16	901	15	40	56.7703								Zircon	1362	19	20	1.4	2798	41	460000
ROS-03-06-02-c	Output_1_313	13.645	2.1	0.13	0.05156	0.0021	0.549639	19.3949	0.789939	0.2966	0.02	0.51702	0.272669	0.13	0.0363952	0.0021	0.120146	0.0826	0.0062	0.2966	0.02	1604	26	120	3451	25	100	324.1	3.2	13	1148	11	43	71.7683								Inclusion
ROS-03-06-03-c	Output_1_314	34.47	0.89	0.056	0.02129	0.0011	0.634608	46.9704	2.42684	0.313	0.024	0.558806	0.158577	0.056	0.0149223	0.0011	0.204336	0.02413	0.0018	0.313	0.024	482	12	36	3515	60	120	135.8	3.9	6.7	647	8.3	29	79.0108								Inclusion
ROS-03-06-03-r	Output_1_315	33.034	1.393	0.12	0.0236	0.0015	0.593708	42.3729	2.69319	0.4341	0.028	0.701887	0.133676	0.12	0.0128991	0.0015	0.128466	0.0362	0.0034	0.4341	0.028	718	43	64	4031	13	97	150.5	7.6	9.5	890	34	49	83.0899								Inclusion
ROS-03-06-04-c	Output_1_316	14.722	1.079	0.11	0.0599	0.0026	0.391741	16.6945	0.724636	0.135	0.016	0.343898	0.651758	0.11	0.0560907	0.0026	0.264841	0.0266	0.0024	0.135	0.016	531	28	46	2090	180	210	375.1	6.7	16	736	45	55	49.0353								Zircon	1102	32	9.5	1.7	2707	66	414200
ROS-03-06-04-r	Output_1_318	33.393	1.752	0.13	0.06336	0.0026	0.483953	15.7828	0.647654	0.2029	0.016	0.461618	0.618017	0.13	0.0538768	0.0026	0.223609	0.0506	0.0042	0.2029	0.016	998	40	81	2834	78	130	396	4.2	16	1028	29	49	61.4786								Zircon	1257	31	9.9	1.3	2704	63	452900
ROS-03-06-05-c	Output_1_319	29.803	0.692	0.049	0.0581	0.0028	0.562649	17.2117	0.82948	0.0892	0.0083	0.459903	0.524788	0.049	0.056539	0.0028	0.468565	0.02239	0.0017	0.0892	0.0083	448	12	34	1370	130	170	364	11	17	532	15	29	31.5789								Zircon	1570	130	15.8	2.6	3590	280	453900
ROS-03-06-05-r	Output_1_320	29.444	1.292	0.096	0.0477	0.0024	0.560695	20.9644	1.05481	0.203	0.017	0.515009	0.4822	0.096	0.0406435	0.0024	0.284359	0.03013	0.0023	0.203	0.017	600	17	47	2809	91	140	300.2	9.1	15	839	24	43	64.2193								Zircon	1990	130	52.3	5.5	5170	400	445500
ROS-03-06-07-r	Output_1_322	37.343	0.726	0.048	0.06202	0.0025	0.520562	16.1238	0.649945	0.0861	0.0061	0.49452	0.669645	0.048	0.0614748	0.0025	0.493459	0.02165	0.0016	0.0861	0.0061	432.9	8.3	32	1333	58	140	387.9	2.7	15	554	11	29	29.9819								Zircon	1458	27	7.31	0.65	2799	34	431700
ROS-03-06-07-c	Output_1_324	4.6679	2.09	0.28	0.0634	0.0028	0.31308	15.7729	0.696594	0.237	0.029	0.339491	0.445418	0.28	0.05004	0.0028	0.0886618	0.0686	0.01	0.237	0.029	1340	160	190	3080	170	200	396.1	7.2	17	1137	86	96	65.1627								Zircon	1218	84	5.4	1.1	2160	190	414300
ROS-03-06-08-c	Output_1_325	24.058	1.023	0.068	0.0609	0.0027	0.554881	16.4204	0.727996	0.1224	0.0089	0.520591	0.467207	0.068	0.0562908	0.0027	0.312995	0.03507	0.0026	0.1224	0.0089	697	11	51	1977	62	130	380.8	7.9	16	714	13	34	46.6667								Zircon	1001	96	14.3	1.4	2180	180	440300
ROS-03-06-08-r	Output_1_326	19.749	1.062	0.089	0.06644	0.0027	0.436324	15.0512	0.611652	0.1159	0.0098	0.433177	0.523496	0.089	0.0620262	0.0027	0.248041	0.0515	0.0046	0.1159	0.0098	1015	57	89	1897	94	150	414.7	3.3	16	735	29	43	43.5782								Zircon	1306	52	12.6	1.5	2747	72	455600
ROS-03-06-08-r	Output_1_327	8.6176	3.9	0.26	0.0828	0.0036	0.546268	12.0773	0.5251	0.345	0.027	0.485643	0.300453	0.26	0.0531782	0.0036	0.0779916	0.346	0.031	0.345	0.027	6000	270	470	3678	64	120	512.8	9.2	21	1612	23	54	68.1886								Zircon	1959	52	25.5	3.8	3830	160	400600
ROS-03-06-10-r	Output_1_330	7.8995	0.88	0.13	0.049	0.0025	0.326448	20.4082	1.04123	0.133	0.022	0.29474	0.774751	0.13	0.0479789	0.0025	0.296564	0.0177	0.0021	0.133	0.022	354	33	41	2040	270	290	308.6	8.5	15	636	62	68	51.478								Zircon	1270	70	22.2	5.7	3000	230	474000
ROS-03-06-11-c	Output_1_332	34.83	0.918	0.061	0.0376	0.0029	0.757607	26.5957	2.05127	0.189	0.016	0.673474	0.462628	0.061	0.0333016	0.0029	0.551098	0.023	0.002	0.189	0.016	459	22	40	2677	95	140	238	15	18	660	14	33	63.9394								Inclusion
ROS-03-06-12-r	Output_1_333	36.984	1.94	0.16	0.05678	0.0024	0.456094	17.6118	0.744424	0.255	0.023	0.424343	0.562268	0.16	0.044964	0.0024	0.184358	0.0649	0.0062	0.255	0.023	1277	76	120	3140	110	160	356	4.7	14	1086	38	56	67.2192								Inclusion
ROS-03-06-13-c	Output_1_334	8.9767	1.27	0.19	0.0596	0.0071	0.622916	16.7785	1.99878	0.1553	0.012	0.838968	1.87273	0.19	0.0645165	0.0071	0.735229	0.0102	0.0012	0.1553	0.012	205	18	24	2395	82	140	373	40	43	822	77	84	54.6229								Zircon	932	88	15.5	2.1	1770	90	434000
ROS-03-06-14-c	Output_1_335	11.849	1.053	0.088	0.06259	0.0026	0.445111	15.977	0.663687	0.1213	0.011	0.416461	0.534593	0.088	0.0583822	0.0026	0.261152	0.0272	0.0023	0.1213	0.011	542	22	45	1960	100	150	391.4	4.9	16	728	30	43	46.2363								Zircon	1126	48	10.5	2.3	3310	340	373200
ROS-03-06-15-r	Output_1_336	16.517	0.93	0.068	0.06589	0.0027	0.488886	15.1768	0.621906	0.1033	0.0076	0.486586	0.493527	0.068	0.0622405	0.0027	0.30031	0.03016	0.0023	0.1033	0.0076	600	16	45	1701	73	150	411.3	5.8	17	670	18	34	38.6119								Zircon	441	35	10.4	1.2	2507	40	458200
ROS-03-06-17-c	Output_1_338	35.548	0.832	0.069	0.055	0.0026	0.495212	18.1818	0.859504	0.1147	0.011	0.44213	0.795599	0.069	0.0543908	0.0026	0.482711	0.01868	0.0016	0.1147	0.011	374	16	31	1800	140	190	345	8.8	16	612	27	39	43.6275								Zircon	1496	58	18.1	2.7	3140	120	432700
ROS-03-06-18-c	Output_1_339	19.749	0.759	0.079	0.05972	0.0025	0.373144	16.7448	0.700972	0.0928	0.01	0.362115	0.561939	0.079	0.0580581	0.0025	0.292865	0.0283	0.0037	0.0928	0.01	562	63	75	1440	170	210	373.9	4.7	15	576	38	47	35.0868								Zircon	1116	34	6.51	0.93	1925	64	414000
ROS-03-06-19-r	Output_1_340	5.7451	0.47	0.042	0.04146	0.0019	0.456323	24.1196	1.10534	0.0837	0.0071	0.475316	0.426375	0.042	0.0410292	0.0019	0.425445	0.01397	0.0011	0.0837	0.0071	280.4	6.1	21	1280	110	170	261.9	5.7	12	390	22	30	32.8462								Zircon	946	39	19.5	2.4	2813	92	440000
ROS-03-06-20-c	Output_1_341	9.6948	0.754	0.063	0.0505	0.0026	0.524593	19.802	1.01951	0.1092	0.01	0.490074	0.618449	0.063	0.0493295	0.0026	0.459537	0.01904	0.0014	0.1092	0.01	381.3	3.7	28	1760	130	180	317.5	9.5	16	576	22	33	44.8785								Zircon	939	47	14.3	2.2	1660	100	400200
TIC-01
Concordant-Autocrysts
Spot #317	Output_1_112	26.242	0.445	0.035	0.05611	0.0036	0.632106	17.8221	1.14346	0.0574	0.0037	0.705454	0.451229	0.035	0.0561707	0.0036	0.636965	0.01719	0.0025	0.0574	0.0037	344	14	49	450	120	140	351.9	5.8	22	370	18	24	4.89189	351.9	22	0.445	0.035	0.05611	0.0036	0.632106	Zircon	669	51	7.4	1.4	0	0	476000
Spot #333	Output_1_124	26.24	0.445	0.03	0.0573	0.0037	0.691714	17.452	1.12692	0.0571	0.0034	0.735147	0.502482	0.03	0.057725	0.0037	0.73174	0.01706	0.0024	0.0571	0.0034	342	10	48	440	100	130	359	6.8	22	372	15	21	3.49462	359	22	0.445	0.03	0.0573	0.0037	0.691714	Zircon	1162	71	19.6	3.3	0	0	456500
Spot #339	Output_1_130	25.892	0.483	0.032	0.0572	0.0038	0.708071	17.4825	1.16143	0.0614	0.0032	0.786781	0.553702	0.032	0.0577743	0.0038	0.751209	0.01405	0.0021	0.0614	0.0032	282	15	41	645	83	110	358.6	8.1	23	398	15	22	9.8995	358.6	23	0.483	0.032	0.0572	0.0038	0.708071	Zircon	772	58	22.9	9.2	0	0	478000
Spot #350	Output_1_137	27.297	0.549	0.042	0.0583	0.0039	0.658256	17.1527	1.14743	0.0687	0.0047	0.69913	0.478214	0.042	0.0576922	0.0039	0.609944	0.0267	0.0046	0.0687	0.0047	532	51	87	810	120	140	365.2	8.8	23	440	20	26	17	361.575	23	0.478214	0.042	0.0576922	0.0039	0.609944	Zircon	676	55	7.4	1.5	0	0	459600
Spot #351	Output_1_138	26.945	0.443	0.034	0.0574	0.0042	0.690031	17.4216	1.27475	0.0561	0.0031	0.798004	0.681125	0.034	0.0593561	0.0042	0.817133	0.0126	0.0025	0.0561	0.0031	253	35	49	412	95	120	360	13	25	369	19	24	2.43902	360	25	0.443	0.034	0.0574	0.0042	0.690031	Zircon	1016	63	9.7	2.3	0	0	467000
Spot #352	Output_1_139	26.594	0.46	0.031	0.0572	0.0039	0.711218	17.4825	1.19199	0.0584	0.0033	0.769948	0.52878	0.031	0.0577639	0.0039	0.755072	0.01605	0.0023	0.0584	0.0033	321.7	9.8	45	510	100	130	358	10	24	385	14	21	7.01299	358	24	0.46	0.031	0.0572	0.0039	0.711218	Zircon	1500	150	10.7	2.2	0	0	462000
Spot #359	Output_1_142	13.782	0.466	0.036	0.0557	0.0037	0.65198	17.9533	1.19259	0.0604	0.0037	0.73513	0.476055	0.036	0.0558023	0.0037	0.659275	0.01678	0.0025	0.0604	0.0037	336	20	50	610	120	140	349.4	8.9	23	387	19	25	9.71576	349.4	23	0.466	0.036	0.0557	0.0037	0.65198	Zircon	1570	110	40.4	4.8	0	0	468000
Spot #368	Output_1_151	25.891	0.476	0.032	0.0595	0.0042	0.724138	16.8067	1.18636	0.0587	0.0034	0.773057	0.481634	0.032	0.0595023	0.0042	0.728164	0.01858	0.0027	0.0587	0.0034	372	18	54	520	100	130	372	12	26	393	15	22	5.34351	372	26	0.476	0.032	0.0595	0.0042	0.724138	Zircon	1310	110	13	3.6	0	0	471600
Spot #375	Output_1_154	26.242	0.471	0.03	0.05888	0.0037	0.702315	16.9837	1.06725	0.0582	0.0031	0.762832	0.505839	0.03	0.0591564	0.0037	0.725644	0.01664	0.0024	0.0582	0.0031	334	13	47	512	92	120	368.8	6	23	390	13	21	5.4359	368.8	23	0.471	0.03	0.05888	0.0037	0.702315	Zircon	1031	70	8.9	1.6	0	0	470500
Spot #377	Output_1_156	26.24	0.456	0.031	0.0565	0.0038	0.703302	17.6991	1.19038	0.0598	0.0037	0.735948	0.473184	0.031	0.0565622	0.0038	0.715944	0.01712	0.0025	0.0598	0.0037	343	16	50	530	110	130	354.5	9.2	23	380	15	22	6.71053	354.5	23	0.456	0.031	0.0565	0.0038	0.703302	Zircon	1084	73	13.3	2.4	0	0	476000
Spot #382	Output_1_161	26.244	0.486	0.038	0.0591	0.0039	0.644972	16.9205	1.11658	0.0606	0.0042	0.689563	0.880858	0.038	0.0622894	0.0039	0.82346	0.01104	0.0017	0.0606	0.0042	222	14	34	560	130	150	370.3	8.4	24	402	20	26	7.88557	370.3	24	0.486	0.038	0.0591	0.0039	0.644972	Zircon	689	62	13	2.6	0	0	473700
Xenocryst
Spot #311	Output_1_110	26.242	0.553	0.039	0.0701	0.0045	0.673137	14.2653	0.915749	0.0581	0.0035	0.729202	0.585608	0.039	0.0702991	0.0045	0.692975	0.02067	0.003	0.0581	0.0035	413	18	59	500	110	140	436.8	7.4	27	444	18	26	1.62162	436.8	27	0.553	0.039	0.0701	0.0045	0.673137	Zircon	731	50	6.8	1.5	0	0	473600
Spot #319	Output_1_114	26.244	0.528	0.037	0.0687	0.0044	0.674639	14.556	0.932265	0.0565	0.0034	0.72878	0.568667	0.037	0.0689765	0.0044	0.700078	0.02074	0.0029	0.0565	0.0034	415	13	58	420	110	130	428.5	6.8	26	427	18	25	0.351288	428.5	26	0.528	0.037	0.0687	0.0044	0.674639	Zircon	591	51	7.7	1.7	0	0	470000
Spot #322	Output_1_117	26.24	0.475	0.032	0.0616	0.0039	0.684826	16.2338	1.02779	0.0573	0.0035	0.719665	0.649394	0.032	0.0629404	0.0039	0.782677	0.01236	0.0018	0.0573	0.0035	248	12	36	450	100	120	385.5	6.3	24	395	15	23	2.40506	385.5	24	0.475	0.032	0.0616	0.0039	0.684826	Zircon	1007	63	39	15	0	0	473700
Spot #323	Output_1_118	26.244	4.85	0.3	0.3142	0.02	0.717163	3.18269	0.20259	0.1143	0.0056	0.792447	5.11323	0.3	0.315398	0.02	0.734011	0.0888	0.013	0.1143	0.0056	1718	45	230	1843	64	90	1760	29	98	1785	32	52	1.40056	1843	90	4.85	0.3	0.3142	0.02	0.717163	Zircon	297	40	14	2.9	0	0	474000
Spot #324	Output_1_119	25.893	4.59	0.33	0.3012	0.02	0.678479	3.32005	0.220455	0.1126	0.0073	0.715514	4.5942	0.33	0.300612	0.02	0.679529	0.0898	0.013	0.1126	0.0073	1735	74	240	1790	100	120	1696	36	98	1729	46	63	1.90862	1790	120	4.59	0.33	0.3012	0.02	0.678479	Zircon	172	39	8.1	1.8	0	0	480300
Spot #334	Output_1_125	26.244	0.496	0.037	0.0658	0.0042	0.650143	15.1976	0.970058	0.0559	0.0037	0.694159	0.507706	0.037	0.0658064	0.0042	0.658834	0.0205	0.003	0.0559	0.0037	409	21	60	380	120	140	411	7.7	26	409	20	26	0.488998	411	26	0.496	0.037	0.0658	0.0042	0.650143	Zircon	1181	64	6.9	1.3	0	0	478000
Spot #336	Output_1_127	26.244	0.504	0.034	0.06353	0.004	0.682315	15.7406	0.991065	0.058	0.0033	0.741943	0.55209	0.034	0.0638938	0.004	0.712889	0.01773	0.0025	0.058	0.0033	355	14	51	502	91	120	397	5.8	24	412	16	23	3.64078	397	24	0.504	0.034	0.06353	0.004	0.682315	Zircon	1050	67	5.8	1.3	0	0	470300
Spot #337	Output_1_128	26.242	0.506	0.035	0.06441	0.004	0.668068	15.5255	0.96417	0.0576	0.0033	0.735	0.683619	0.035	0.0658256	0.004	0.764748	0.01325	0.002	0.0576	0.0033	266	14	39	460	100	130	402.4	5	24	413	16	23	2.56659	402.4	24	0.506	0.035	0.06441	0.004	0.668068	Zircon	839	57	7	1.5	0	0	465000
Spot #338	Output_1_129	26.244	0.537	0.041	0.0689	0.0045	0.65004	14.5138	0.947925	0.0576	0.0038	0.703542	0.552099	0.041	0.0689422	0.0045	0.66018	0.02129	0.0031	0.0576	0.0038	426	18	61	450	120	140	429.4	8.6	27	433	21	27	0.831409	429.4	27	0.537	0.041	0.0689	0.0045	0.65004	Zircon	912	62	16.6	3.7	0	0	451000
Spot #347	Output_1_134	26.24	0.529	0.042	0.0682	0.0043	0.621887	14.6628	0.924485	0.0574	0.0042	0.652771	0.560878	0.042	0.0683752	0.0043	0.643114	0.02004	0.0029	0.0574	0.0042	401	19	58	450	130	150	425.2	6.6	26	435	22	28	2.25287	425.2	26	0.529	0.042	0.0682	0.0043	0.621887	Zircon	354	42	11.7	2.4	0	0	472000
Spot #349	Output_1_136	26.246	2.041	0.14	0.1885	0.012	0.680257	5.30504	0.337721	0.0785	0.0041	0.773103	2.07927	0.14	0.18881	0.012	0.686426	0.0553	0.0078	0.0785	0.0041	1088	32	150	1136	77	100	1113	20	66	1120	31	46	0.625	1136	100	2.041	0.14	0.1885	0.012	0.680257	Zircon	621	49	11.2	1.9	0	0	467800
Spot #354	Output_1_141	26.596	0.498	0.033	0.0651	0.0042	0.697588	15.361	0.991031	0.0559	0.0032	0.748	0.664621	0.033	0.0664394	0.0042	0.786421	0.01575	0.0023	0.0559	0.0032	316	13	45	398	98	120	406.8	7.5	25	408	15	22	0.294118	406.8	25	0.498	0.033	0.0651	0.0042	0.697588	Zircon	720	110	4.6	1.3	0	0	465600
Spot #360	Output_1_143	26.24	0.481	0.039	0.0633	0.004	0.614717	15.7978	0.998281	0.0554	0.0041	0.649347	0.647415	0.039	0.064649	0.004	0.716499	0.01439	0.0022	0.0554	0.0041	289	19	44	350	140	150	395.7	7	25	395	21	26	0.177215	395.7	25	0.481	0.039	0.0633	0.004	0.614717	Zircon	605	61	6.7	1.5	0	0	460000
Spot #361	Output_1_144	26.242	1.775	0.11	0.1777	0.011	0.706709	5.62746	0.348352	0.0723	0.0036	0.779203	1.78985	0.11	0.17785	0.011	0.709353	0.0523	0.0075	0.0723	0.0036	1030	40	140	973	80	110	1054	13	61	1031	24	40	2.23084	973	110	1.78985	0.11	0.17785	0.011	0.709353	Zircon	317	43	10.7	2.5	0	0	454300
Spot #362	Output_1_145	26.244	0.533	0.04	0.0679	0.0043	0.644916	14.7275	0.932672	0.0574	0.0038	0.691249	0.513424	0.04	0.0677055	0.0043	0.631849	0.02229	0.0032	0.0574	0.0038	446	17	63	440	130	150	423.7	7.1	26	430	20	27	1.46512	422.317	26	0.513424	0.04	0.0677055	0.0043	0.631849	Zircon	795	70	9	2.2	0	0	464000
Spot #363	Output_1_146	26.242	0.87	0.06	0.1027	0.0065	0.676147	9.7371	0.616272	0.062	0.0038	0.71837	0.873161	0.06	0.102665	0.0065	0.677603	0.0319	0.0046	0.062	0.0038	634	22	89	630	110	130	630	10	38	635	24	34	0.787402	630	38	0.87	0.06	0.1027	0.0065	0.676147	Zircon	312	53	46	24	0	0	489500
Spot #366	Output_1_149	26.242	0.495	0.034	0.0641	0.0041	0.681491	15.6006	0.997856	0.0564	0.0035	0.717719	0.529128	0.034	0.0643538	0.0041	0.704082	0.018	0.0027	0.0564	0.0035	360	21	54	410	110	140	400.7	6.6	25	406	17	23	1.30542	400.7	25	0.495	0.034	0.0641	0.0041	0.681491	Zircon	752	53	5.4	1.8	0	0	492000
Spot #367	Output_1_150	25.889	0.489	0.041	0.0648	0.0044	0.62935	15.4321	1.04786	0.0556	0.0041	0.677378	0.5038	0.041	0.0648596	0.0044	0.640301	0.0198	0.003	0.0556	0.0041	395	26	60	380	150	170	405	12	27	399	23	28	1.50376	405	27	0.489	0.041	0.0648	0.0044	0.62935	Zircon	1047	87	9.3	2.2	0	0	473000
Spot #374	Output_1_153	26.242	0.592	0.048	0.06503	0.0041	0.613848	15.3775	0.969519	0.0671	0.0051	0.638447	0.503553	0.048	0.0642266	0.0041	0.556437	0.0265	0.0039	0.0671	0.0051	528	28	77	730	150	170	406.1	5.7	25	467	25	31	13.0407	401.279	25	0.503553	0.048	0.0642266	0.0041	0.556437	Inclusion
Spot #376	Output_1_155	25.891	9.8	0.53	0.4273	0.027	0.759726	2.34028	0.147876	0.1687	0.0067	0.846651	10.0141	0.53	0.427853	0.027	0.766204	0.1184	0.016	0.1687	0.0067	2262	33	300	2537	33	67	2292	31	120	2416	23	52	5.13245	2537	67	9.8	0.53	0.4273	0.027	0.759726	Zircon	200	38	11.5	1.8	0	0	473000
Spot #387	Output_1_162	26.242	0.509	0.043	0.0684	0.0044	0.605818	14.6199	0.94046	0.0547	0.0042	0.642198	0.52784	0.043	0.0685	0.0044	0.619168	0.0206	0.0031	0.0547	0.0042	411	24	61	360	140	150	427.9	8.5	28	422	23	28	1.3981	427.112	28	0.52784	0.043	0.0685	0.0044	0.619168	Zircon	1366	73	11.4	1.8	0	0	468000
Pb loss
Spot #331	Output_1_122	26.246	0.463	0.034	0.0513	0.0041	0.736363	19.4932	1.55793	0.0672	0.0034	0.844924	0.398084	0.034	0.0506633	0.0041	0.687801	0.0261	0.0038	0.0672	0.0034	520	21	74	817	84	110	322	16	25	384	17	23	16.1458	318.593	25	0.398084	0.034	0.0506633	0.0041	0.687801	Zircon	2040	230	53.4	7.4	0	0	463000
Spot #389	Output_1_164	25.891	0.279	0.026	0.0362	0.0027	0.624867	27.6243	2.06038	0.058	0.0047	0.677223	0.176554	0.026	0.035261	0.0027	0.461326	0.01872	0.0028	0.058	0.0047	375	20	55	420	150	170	228.9	9.7	17	250	18	21	8.44	228.9	17	0.279	0.026	0.0362	0.0027	0.624867	Zircon	1167	81	25.4	3.2	0	0	468000
Discordant
Spot #310	Output_1_109	26.244	0.423	0.025	0.032	0.0023	0.772402	31.25	2.24609	0.0982	0.0044	0.84861	0.329992	0.025	0.0311403	0.0023	0.69807	0.0161	0.0023	0.0982	0.0044	322.8	8.1	45	1571	55	85	202.7	7.1	14	357.1	9.3	17	43.2372								Inclusion
Spot #312	Output_1_111	26.244	0.437	0.028	0.0363	0.0025	0.732146	27.5482	1.89726	0.0888	0.0038	0.849388	0.390394	0.028	0.0358518	0.0025	0.697086	0.01356	0.0019	0.0888	0.0038	272	10	39	1385	49	82	229.9	7.5	16	367	13	20	37.3569								Inclusion
Spot #318	Output_1_113	26.242	0.436	0.062	0.0419	0.003	0.449715	23.8664	1.70881	0.084	0.012	0.448067	0.283743	0.062	0.0402287	0.003	0.322993	0.0188	0.0032	0.084	0.012	376	36	63	880	270	280	264.6	9.3	18	368	43	45	28.0978								Zircon	251	41	17.8	4.5	0	0	480000
Spot #320	Output_1_115	26.242	0.412	0.033	0.0435	0.0033	0.687652	22.9885	1.74396	0.0696	0.0048	0.73994	0.390358	0.033	0.0432768	0.0033	0.669786	0.0154	0.003	0.0696	0.0048	309	41	59	910	130	150	274	12	20	351	19	24	21.9373								Zircon	2380	270	66.5	9.1	0	0	460600
Spot #321	Output_1_116	26.246	0.319	0.026	0.0374	0.0028	0.676479	26.738	2.00177	0.0644	0.0049	0.701366	0.862216	0.026	0.0418111	0.0028	0.911823	0.00653	0.00096	0.0644	0.0049	131.5	6.6	19	650	150	170	237	10	18	279	16	20	15.0538								Zircon	1530	170	40.6	7.6	0	0	464900
Spot #325	Output_1_120	26.242	1.331	0.079	0.1275	0.0085	0.746883	7.84314	0.522876	0.0766	0.0031	0.854823	1.77898	0.079	0.130955	0.0085	0.825327	0.0288	0.0043	0.0766	0.0031	573	34	85	1098	45	84	773	19	48	856	19	34	9.69626								Zircon	441	57	26.8	3.8	0	0	471000
Spot #326	Output_1_121	26.242	0.381	0.03	0.0417	0.0034	0.719327	23.9808	1.95527	0.0675	0.0035	0.84382	0.777885	0.03	0.0449376	0.0034	0.890934	0.00915	0.0014	0.0675	0.0035	184	11	28	813	82	110	263	14	21	325	17	22	19.0769								Zircon	1330	120	63.4	8.6	0	0	472000
Spot #332	Output_1_123	26.244	0.662	0.045	0.0549	0.0036	0.694276	18.2149	1.19442	0.0884	0.0048	0.770217	0.508865	0.045	0.0535798	0.0036	0.604975	0.0265	0.0041	0.0884	0.0048	529	36	81	1348	84	110	344.3	7.2	22	513	19	27	32.885								Zircon	2160	100	40.4	5.4	0	0	491200
Spot #335	Output_1_126	26.24	0.551	0.042	0.06012	0.0038	0.638311	16.6334	1.05135	0.068	0.0047	0.674849	0.640596	0.042	0.0607553	0.0038	0.690258	0.01609	0.0024	0.068	0.0047	322	16	47	780	120	140	376.3	6	23	442	21	27	14.8643								Zircon	694	52	7.7	1.7	0	0	507000
Spot #340	Output_1_131	26.24	0.407	0.022	0.03927	0.0026	0.774624	25.4647	1.68598	0.0762	0.0034	0.829262	0.428349	0.022	0.0394025	0.0026	0.789133	0.01174	0.0017	0.0762	0.0034	235.8	7.2	33	1078	59	92	248.3	5.5	16	346.1	7.4	16	28.2577								Zircon	2390	110	55.4	4.8	0	0	479000
Spot #345	Output_1_132	26.24	0.403	0.024	0.0414	0.0026	0.725625	24.1546	1.51696	0.071	0.0033	0.803809	0.536263	0.024	0.0424891	0.0026	0.80716	0.00845	0.0012	0.071	0.0033	170	8.3	25	932	65	97	261.5	4.3	16	342.8	9.8	17	23.7165								Inclusion
Spot #346	Output_1_133	26.242	0.465	0.03	0.05197	0.0033	0.701462	19.2419	1.22182	0.0649	0.0034	0.77136	0.54175	0.03	0.0526055	0.0033	0.749689	0.01366	0.002	0.0649	0.0034	274	12	39	757	86	110	326.6	6	20	386	14	21	15.3886								Zircon	1239	77	22.3	2.4	0	0	474300
Spot #348	Output_1_135	26.24	0.441	0.039	0.0462	0.0034	0.639656	21.645	1.59292	0.0708	0.006	0.655677	0.464344	0.039	0.0463122	0.0034	0.658118	0.01419	0.002	0.0708	0.006	285	11	41	810	160	180	291	11	21	366	23	27	20.4918								Inclusion
Spot #353	Output_1_140	26.244	0.44	0.026	0.04863	0.0031	0.733381	20.5634	1.31085	0.0659	0.0033	0.786383	0.510693	0.026	0.0492012	0.0031	0.777812	0.01295	0.0018	0.0659	0.0033	260.1	8.8	37	770	74	100	306.1	4.6	19	369	10	18	17.0461								Zircon	1703	65	34	3.2	0	0	466000
Spot #364	Output_1_147	26.244	0.372	0.027	0.0399	0.003	0.719471	25.0627	1.88441	0.0695	0.0045	0.757754	0.344042	0.027	0.0395831	0.003	0.694676	0.01458	0.0022	0.0695	0.0045	293	15	43	840	120	140	252	11	19	320	14	19	21.25								Zircon	1950	160	44.4	8	0	0	472600
Spot #365	Output_1_148	26.242	0.316	0.022	0.0238	0.0021	0.785052	42.0168	3.70736	0.0982	0.0044	0.891625	0.468581	0.022	0.0250262	0.0021	0.872685	0.00503	0.00081	0.0982	0.0044	101.4	8.5	16	1580	59	91	151.2	9.1	13	277	12	17	45.4152								Inclusion
Spot #373	Output_1_152	26.244	0.498	0.04	0.0425	0.003	0.66013	23.5294	1.6609	0.087	0.0051	0.769307	0.441243	0.04	0.0419328	0.003	0.61951	0.0163	0.0025	0.087	0.0051	327	22	50	1342	93	110	268.1	9.7	19	411	22	27	34.7689								Inclusion
Spot #378	Output_1_157	26.244	0.85	0.2	0.05	0.0036	0.292607	20	1.44	0.126	0.026	0.329444	1.14884	0.2	0.0523206	0.0036	0.367569	0.0121	0.0027	0.126	0.026	242	41	53	1540	300	300	314	12	22	559	77	79	43.8283								Zircon	1850	86	37.7	8.3	0	0	466600
Spot #379	Output_1_158	26.246	0.404	0.026	0.0424	0.0029	0.728288	23.5849	1.61312	0.0707	0.0035	0.810074	0.545434	0.026	0.043498	0.0029	0.813461	0.00889	0.0014	0.0707	0.0035	179	12	28	927	73	100	267.7	7.9	18	346	13	20	22.6301								Zircon	1900	100	50.4	6.3	0	0	469300
Spot #380	Output_1_159	26.244	0.452	0.03	0.0519	0.0035	0.712716	19.2678	1.29937	0.0641	0.0034	0.786003	0.495601	0.03	0.0522066	0.0035	0.742217	0.01533	0.0023	0.0641	0.0034	307	15	45	712	92	120	326.2	8.3	21	377	14	21	13.4748								Zircon	1670	100	28	4.2	0	0	468600
Spot #381	Output_1_160	26.242	0.1145	0.0065	0.00873	0.00058	0.760262	114.547	7.61026	0.097	0.0047	0.807952	0.285305	0.0065	0.0101511	0.00058	0.92888	0.001079	0.00015	0.097	0.0047	21.8	0.75	3.1	1542	63	90	56.1	1.5	3.7	110	3	6	49								Inclusion
Spot #388	Output_1_163	26.244	0.527	0.036	0.0549	0.0036	0.692504	18.2149	1.19442	0.0702	0.0038	0.771184	0.574317	0.036	0.0552562	0.0036	0.720623	0.0142	0.0023	0.0702	0.0038	285	24	46	899	94	120	344.3	7	22	427	17	24	19.3677								Zircon	1549	75	32	6.3	0	0	464000
Spot #390	Output_1_165	26.242	0.633	0.049	0.0584	0.0048	0.727969	17.1233	1.40739	0.0797	0.004	0.853467	0.860627	0.049	0.0602056	0.0048	0.813794	0.01266	0.002	0.0797	0.004	254	20	40	1171	74	100	365	19	29	493	23	30	25.9635								Zircon	1510	100	64	11	0	0	486400
[truncated: 34 more columns]

## Sheet: Zircon-LA-ICP-MS-drill-cuttings
Siégel et al. (2018). Supplementary papers. Australian Journal of Earth Sciences, 65, https://doi.org/10.1080/08120099.2018.1447998
Appendix 2. Results – zircon U–Pb dating LA-ICP-MS & SHRIMP.
			Data for Wetherill plot (data not corrected for common Pb)					Data for Tera-Wasserburg plot (data not corrected for common Pb)																	Preferred choice								Zircon composition
Analysis name	Integration number	Duration (s)	207Pb/235U	2s abs. prop.	206Pb/238U	2s abs. prop.	Error correlation	238U/206Pb	2s abs. prop.	207Pb/206Pb	2s abs. prop.	Error correlation	207Pb/206Pb	2s abs. prop.	207Pb/206Pb age (Ma)	2s abs. int.	2s. abs. prop.	206Pb/238U age (Ma)	2s abs. int.	2s abs. prop.	207Pb/235U age (Ma)	2s abs. int.	2s. abs. prop.	% Disc.	Overall best age (Ma)	2s. abs. prop.	207Pb/235U	2s abs. prop.	206Pb/238U	2s abs. prop.	Error correlation	Inclusions ?	P (ppm)	2s	Ti (ppm)	2s	Y (ppm)	2s	Zr (ppm)	2s	La (ppm)	2s	Ce (ppm)	2s	Nd (ppm)	2s	Eu (ppm)	2s	Dy (ppm)
CAI-01
Autocrysts
T #11	Output_1_3	26.188	0.492	0.031	0.0628	0.0024	0.518598	15.9236	0.608544	0.0581	0.004	0.485336	0.0581	0.004	440	130	140	392.8	8.5	14	406	21	22	3.25123	392.8	14	0.492	0.031	0.0628	0.0024	0.518598	Zircon	858	60	5.5	1.3	516000	13000	75.3	2.5	0.093	0.061	29.7	1.4	1.62	0.43	1.08	0.22	256.3
T #13	Output_1_5	26.187	0.59	0.12	0.0639	0.0031	0.232015	15.6494	0.759207	0.073	0.014	0.245238	0.073	0.014	490	360	360	399	15	19	452	74	74	11.7257	399	19	0.59	0.12	0.0639	0.0031	0.232015	Zircon	193	51	13	4.8	524000	10000	57.3	1.9	0.004	0.012	16.38	0.84	0.55	0.28	0.67	0.15	48.3
T #16	Output_1_8	26.539	0.445	0.038	0.0611	0.0024	0.417897	16.3666	0.642878	0.0531	0.0048	0.398534	0.0531	0.0048	230	180	180	382.3	9.1	15	367	27	27	4.16894	382.3	15	0.445	0.038	0.0611	0.0024	0.417897	Zircon	399	34	7.4	1.2	488000	15000	57.2	2.3	0	0.007	45	1.6	1.89	0.39	1.66	0.23	132.4
T #24	Output_1_12	26.54	0.426	0.041	0.056	0.0021	0.363049	17.8571	0.669643	0.0551	0.0053	0.363231	0.0551	0.0053	290	190	200	351.2	8	13	353	29	29	0.509915	351.2	13	0.426	0.041	0.056	0.0021	0.363049	Zircon	278	37	12.8	1.6	499000	14000	56.1	2	0.051	0.035	21.89	0.98	3.53	0.57	1.88	0.21	125
T #28	Output_1_16	26.188	0.491	0.047	0.0571	0.0023	0.387859	17.5131	0.705433	0.0625	0.0061	0.381495	0.0625	0.0061	560	200	200	358	9.1	14	402	31	31	10.9453	358	14	0.491	0.047	0.0571	0.0023	0.387859	Zircon	522	75	15.4	6.1	559000	11000	69.9	2.1	0.45	0.17	34.2	2	4.9	1.3	1.85	0.39	174
T #29	Output_1_17	26.187	0.47	0.031	0.0581	0.0022	0.49788	17.2117	0.651734	0.0581	0.0039	0.491321	0.0581	0.0039	450	130	140	364.3	7.7	13	387	21	21	5.86563	364.3	13	0.47	0.031	0.0581	0.0022	0.49788	Zircon	76	31	2.55	0.84	499000	12000	58.4	1.9	-0.00363	0.00014	15.12	0.87	0.014	0.041	0.019	0.023	13.3
T #30	Output_1_18	26.54	0.478	0.031	0.0586	0.0023	0.517761	17.0648	0.669781	0.0589	0.0039	0.509911	0.0589	0.0039	470	130	140	366.8	9.1	14	393	21	21	6.66667	366.8	14	0.478	0.031	0.0586	0.0023	0.517761	Zircon	314	41	21.6	4.3	528000	13000	69.9	2.3	0.91	0.16	38.7	1.8	17.4	1.9	5.86	0.59	174.3
T #31	Output_1_19	26.541	0.434	0.067	0.0641	0.0028	0.272264	15.6006	0.681462	0.0481	0.0073	0.276592	0.0481	0.0073	10	260	270	400	12	17	355	47	47	12.6761	400	17	0.434	0.067	0.0641	0.0028	0.272264	Zircon	394	36	9.2	1.6	495000	17000	56.3	2	-0.00342	0.00011	43.6	1.8	2.98	0.47	1.89	0.26	116.1
T #32	Output_1_20	26.187	0.379	0.027	0.0505	0.0019	0.467	19.802	0.745025	0.0544	0.0041	0.446643	0.0544	0.0041	300	150	160	317.3	6.6	11	323	20	20	1.76471	317.3	11	0.379	0.027	0.0505	0.0019	0.467	Zircon	248	38	6.5	1.6	487000	15000	58.1	2.3	0.114	0.046	15.01	0.63	3.64	0.68	1.35	0.21	142.7
T #37	Output_1_21	26.188	0.394	0.021	0.05461	0.0019	0.546616	18.3117	0.637102	0.0521	0.0028	0.543443	0.0521	0.0028	270	110	120	342.7	5.9	12	335	15	15	2.29851	342.7	12	0.394	0.021	0.05461	0.0019	0.546616	Zircon	629	55	7.1	2.4	481000	16000	81.9	3.2	0.46	0.2	24.6	2.9	9.5	3.1	2.4	1	360
T #42	Output_1_26	26.187	0.405	0.058	0.0579	0.0028	0.319933	17.2712	0.83522	0.0519	0.0077	0.309906	0.0519	0.0077	100	270	280	362	13	17	337	43	43	7.4184	362	17	0.405	0.058	0.0579	0.0028	0.319933	Zircon	373	38	18.7	1.9	509000	15000	57	2.1	0.092	0.05	24.4	1	5.31	0.78	3.56	0.37	185.9
T #44	Output_1_28	26.188	0.526	0.05	0.0652	0.0029	0.423813	15.3374	0.682186	0.0601	0.0061	0.401375	0.0601	0.0061	440	210	220	407	12	17	431	33	33	5.56845	407	17	0.526	0.05	0.0652	0.0029	0.423813	Zircon	218	40	12.7	2.9	496000	14000	55.9	2.1	0.33	0.11	11.6	1.1	6.5	1.6	3.46	0.84	56.2
T #52	Output_1_32	26.891	0.426	0.045	0.0602	0.0025	0.365876	16.6113	0.689838	0.0515	0.0054	0.368228	0.0515	0.0054	170	210	210	377	11	15	357	34	34	5.60224	377	15	0.426	0.045	0.0602	0.0025	0.365876	Zircon	327	39	34	12	512000	15000	60	2.3	0.066	0.04	48.6	1.7	3.05	0.6	1.75	0.27	124.6
T #53	Output_1_33	26.539	0.497	0.064	0.0593	0.0025	0.311137	16.8634	0.710936	0.0617	0.0084	0.295806	0.0617	0.0084	370	270	270	371	11	15	392	43	43	5.35714	371	15	0.497	0.064	0.0593	0.0025	0.311137	Zircon	303	38	8.4	1.4	518000	16000	59.4	2.2	0.008	0.013	21.3	1.1	1.9	0.47	1.61	0.25	116.3
T #60	Output_1_40	26.539	0.436	0.032	0.0581	0.0022	0.458497	17.2117	0.651734	0.0553	0.0043	0.437818	0.0553	0.0043	340	160	160	364.2	8	13	363	22	23	0.330579	364.2	13	0.436	0.032	0.0581	0.0022	0.458497	Zircon	459	48	9.1	1.5	506000	14000	60	2.4	0.89	0.32	63.9	2.5	4.72	0.77	1.91	0.21	151.8
T #66	Output_1_42	26.539	0.367	0.04	0.0529	0.0021	0.342231	18.9036	0.750426	0.051	0.0058	0.329564	0.051	0.0058	150	220	220	332.4	8.3	13	309	29	30	7.57282	332.4	13	0.367	0.04	0.0529	0.0021	0.342231	Zircon	161	31	6.7	1.2	498000	13000	59.4	2.1	2.74	0.66	26.7	2.1	10.8	1.5	0.252	0.083	170.4
T #68	Output_1_44	26.539	0.415	0.068	0.0611	0.0029	0.278228	16.3666	0.776811	0.0496	0.008	0.282302	0.0496	0.008	0	290	300	382	14	18	339	50	50	12.6844	382	18	0.415	0.068	0.0611	0.0029	0.278228	Zircon	326	48	12.6	2.1	513000	15000	57.5	2	0.1	0.13	26.4	1.5	2.04	0.89	1.2	0.18	77.3
T #70	Output_1_46	26.188	0.515	0.089	0.0603	0.0033	0.301899	16.5837	0.907568	0.063	0.011	0.299086	0.063	0.011	330	360	360	377	17	20	389	61	61	3.08483	377	20	0.515	0.089	0.0603	0.0033	0.301899	Zircon	257	32	15.3	2.1	502000	14000	55.7	2.1	0.0033	0.0093	16.06	0.79	2.91	0.51	2.39	0.28	113.3
T #71	Output_1_47	26.539	0.434	0.037	0.061	0.0025	0.433263	16.3934	0.671862	0.0539	0.0053	0.384717	0.0539	0.0053	240	190	190	381.8	9.7	15	364	28	28	4.89011	381.8	15	0.434	0.037	0.061	0.0025	0.433263	Zircon	411	34	4.9	1.3	501000	15000	59	2.1	0.015	0.016	41.9	1.5	1.92	0.41	1.47	0.22	128.8
T #80	Output_1_52	26.54	0.458	0.035	0.0548	0.002	0.430956	18.2482	0.665992	0.0606	0.0048	0.41848	0.0606	0.0048	500	160	170	343.8	7.1	12	377	24	25	8.80637	343.8	12	0.458	0.035	0.0548	0.002	0.430956	Zircon	346	38	13.3	3.6	531000	13000	67.2	1.8	0.109	0.064	48.3	1.7	1.69	0.45	1.08	0.2	164
Xenocryst
OT #9	Output_1_1	26.188	3.78	0.14	0.2858	0.011	0.720563	3.49895	0.134669	0.0967	0.0036	0.718773	0.0967	0.0036	1541	59	71	1619	31	53	1587	27	29	2.01638	1541	71	3.78	0.14	0.2858	0.011	0.720563	Zircon	227	31	10.6	1.8	458000	17000	57.6	2.4	0.098	0.041	30.5	1.5	3.82	0.63	1.78	0.24	120.8
T #10	Output_1_2	26.891	3.69	0.15	0.2837	0.012	0.721011	3.52485	0.149095	0.0952	0.0037	0.736354	0.0952	0.0037	1508	62	73	1608	39	58	1560	30	32	3.07692	1508	73	3.69	0.15	0.2837	0.012	0.721011	Zircon	332	37	10	1.8	443000	16000	50.8	2.1	0.075	0.043	39.1	2	2.77	0.54	1.49	0.24	116.6
T #12	Output_1_4	26.539	3.64	0.13	0.2866	0.01	0.698823	3.48918	0.121744	0.0937	0.0041	0.623458	0.0937	0.0041	1468	73	82	1624	25	50	1556	28	30	4.37018	1468	82	3.64	0.13	0.2866	0.01	0.698823	Zircon	46	35	2.8	1.8	477000	15000	53.5	2.1	0.022	0.034	25.3	1.1	0.31	0.16	0.163	0.074	13.13
T #14	Output_1_6	26.188	0.584	0.057	0.0714	0.003	0.395406	14.0056	0.588471	0.0602	0.006	0.388461	0.0602	0.006	440	200	200	445	12	18	456	35	36	2.41228	445	18	0.584	0.057	0.0714	0.003	0.395406	Zircon	439	40	6.8	1.3	477000	17000	53.7	2.1	-0.00362	0.00012	7.95	0.52	0.63	0.26	0.41	0.11	87.7
T #15	Output_1_7	26.188	1.68	0.079	0.162	0.0062	0.631236	6.17284	0.236244	0.0764	0.0037	0.620023	0.0764	0.0037	1060	85	94	967	21	35	998	29	31	3.10621	967	35	1.68	0.079	0.162	0.0062	0.631236	Zircon	382	48	10.1	1.6	444000	13000	154.6	5.8	0.43	0.11	21.8	1.2	12.9	1.9	3.77	0.54	234.3
T #18	Output_1_10	26.539	2.141	0.1	0.2065	0.0078	0.628814	4.84262	0.182917	0.0762	0.0043	0.55625	0.0762	0.0043	1050	110	120	1209	25	42	1153	31	32	4.8569	1050	120	2.141	0.1	0.2065	0.0078	0.628814	Zircon	330	39	21	1.9	486000	17000	53.8	2.5	0.081	0.039	20.8	1.4	7.5	1.2	1.09	0.19	164
T #38	Output_1_22	26.187	4.43	0.2	0.3014	0.011	0.628667	3.31785	0.121089	0.1065	0.0061	0.537372	0.1065	0.0061	1690	110	110	1697	30	55	1712	40	41	0.876168	1690	110	4.43	0.2	0.3014	0.011	0.628667	Zircon	308	43	12.7	1.7	518000	15000	61	2.3	1.38	0.26	25.6	1.3	8.8	1.2	0.41	0.13	109.8
T #57	Output_1_37	26.541	0.613	0.037	0.0795	0.0029	0.517232	12.5786	0.458843	0.0561	0.0032	0.538758	0.0561	0.0032	400	110	120	492.8	9.3	17	480	23	23	2.66667	492.8	17	0.613	0.037	0.0795	0.0029	0.517232	Zircon	988	55	8.4	1.6	502000	15000	55.8	2	-0.003194	8.2e-05	1.08	0.13	0.78	0.25	0.019	0.022	210.6
T #58	Output_1_38	26.539	4.74	0.21	0.3153	0.011	0.618669	3.17158	0.110648	0.1105	0.0049	0.618323	0.1105	0.0049	1790	67	76	1766	26	54	1770	34	35	0.225989	1790	76	4.74	0.21	0.3153	0.011	0.618669	Zircon	699	38	13.3	2	498000	15000	56	2	0.007	0.012	4.58	0.36	0.85	0.3	0.28	0.078	161.7
T #67	Output_1_43	26.539	5.06	0.16	0.3298	0.011	0.725709	3.03214	0.101133	0.1126	0.0039	0.693647	0.1126	0.0039	1834	49	61	1836	26	55	1824	25	27	0.657895	1834	61	5.06	0.16	0.3298	0.011	0.725709	Zircon	425	34	8.6	1.3	513000	13000	57.5	2	-0.0007	0.0051	7	0.39	0.98	0.29	0.14	0.059	105.5
T #69	Output_1_45	26.539	1.662	0.059	0.1669	0.0059	0.705619	5.99161	0.211807	0.073	0.0033	0.616009	0.073	0.0033	987	79	89	994	17	33	990	21	22	0.40404	994	33	1.662	0.059	0.1669	0.0059	0.705619	Zircon	909	50	9.8	1.8	509000	13000	57.6	1.9	0.128	0.051	3.61	0.29	6.21	0.74	1.35	0.2	244
T #72	Output_1_48	26.188	2.17	0.17	0.1921	0.0075	0.44604	5.20562	0.203239	0.0826	0.0063	0.455658	0.0826	0.0063	1170	140	150	1132	25	40	1156	49	50	2.07612	1170	150	2.17	0.17	0.1921	0.0075	0.44604	Zircon	150	32	17.6	3.6	522000	13000	60.8	2.1	0.059	0.037	8.48	0.53	0.89	0.28	0.35	0.1	53.7
Pb loss
T #40	Output_1_24	26.539	2.11	0.66	0.185	0.019	0.311953	5.40541	0.55515	0.083	0.031	0.265137	0.083	0.031	-130	710	710	1083	95	100	950	290	290	14	-130	710	2.11	0.66	0.185	0.019	0.311953	Zircon	382	40	32.9	2.8	505000	15000	56.1	2.1	0.017	0.017	34.1	1.5	4.37	0.68	1.64	0.25	127.4
T #81	Output_1_53	26.539	0.357	0.045	0.0451	0.0021	0.346515	22.173	1.03244	0.0587	0.0078	0.330702	0.0587	0.0078	300	250	260	284	10	13	299	33	33	5.01672	284	13	0.357	0.045	0.0451	0.0021	0.346515	Zircon	211	32	9	1.7	506000	16000	57.5	2.3	0.131	0.055	17.71	0.79	11.2	1.1	1.87	0.24	181.6
Discordant
T #17	Output_1_9	26.539	0.595	0.05	0.0651	0.0027	0.442579	15.361	0.637092	0.0677	0.0062	0.412543	0.0677	0.0062	680	180	190	406	11	16	465	31	31	12.6882								Inclusion
T #23	Output_1_11	26.188	1.03	0.12	0.0677	0.0031	0.365794	14.7711	0.67637	0.112	0.013	0.366976	0.112	0.013	1560	250	250	422	14	19	690	58	59	38.8406								Inclusion
T #25	Output_1_13	26.187	0.521	0.037	0.0586	0.0024	0.499577	17.0648	0.698902	0.0642	0.0044	0.512967	0.0642	0.0044	670	140	140	367.2	9.7	15	421	24	24	12.7791								Zircon	1020	110	25.8	3.2	458000	15000	55.5	2.1	8.5	1.5	93.3	9.3	30.6	4.3	7.2	1.1	264
T #26	Output_1_14	25.836	0.675	0.095	0.0655	0.003	0.309458	15.2672	0.69926	0.075	0.011	0.298086	0.075	0.011	720	280	280	409	14	18	496	55	55	17.5403								Zircon	293	51	32	11	552000	13000	63.5	2.3	0.203	0.09	38.3	1.7	2.07	0.52	1.6	0.33	110.2
T #27	Output_1_15	26.188	0.338	0.022	0.0409	0.0017	0.538208	24.4499	1.01625	0.06	0.004	0.529066	0.06	0.004	540	140	140	258.1	6.8	10	296	17	18	12.8041								Zircon	729	49	38	3.9	461000	16000	61	2.7	2.69	0.26	114.5	5	60.8	4.3	22.1	1.5	427
T #39	Output_1_23	26.188	0.379	0.063	0.0601	0.0029	0.278775	16.6389	0.802877	0.0458	0.008	0.266275	0.0458	0.008	-170	300	300	376	14	18	306	48	48	22.8758								Zircon	227	36	9.5	1.6	502000	14000	57.5	2	0.0003	0.0076	24.3	2	1.27	0.3	1.32	0.21	90.9
T #41	Output_1_25	26.187	0.393	0.036	0.0425	0.0017	0.400178	23.5294	0.941176	0.0687	0.0067	0.379472	0.0687	0.0067	700	200	200	268	6.5	10	331	26	26	19.0332								Zircon	170	41	8.3	1.9	538900	8900	62.6	1.5	0.067	0.049	17.6	0.75	2.43	0.52	0.234	0.095	139.1
T #43	Output_1_27	26.188	0.678	0.082	0.0613	0.0029	0.364282	16.3132	0.771751	0.081	0.011	0.328971	0.081	0.011	870	290	290	383	13	18	502	52	52	23.7052								Zircon	278	48	21	3.7	549000	13000	61.7	2.1	0.012	0.016	25	1.1	0.99	0.28	0.96	0.2	88.4
T #45	Output_1_29	26.539	0.867	0.052	0.0585	0.0022	0.53123	17.094	0.642852	0.1083	0.007	0.502902	0.1083	0.007	1680	120	130	366.6	7.7	13	632	29	30	41.9937								Zircon	608	39	20.5	4.3	527000	15000	65.7	2.3	1.15	0.18	61.9	2.3	14.3	1.8	6.02	0.57	266.3
T #46	Output_1_30	26.187	1.25	0.13	0.0646	0.0033	0.440875	15.4799	0.790768	0.142	0.015	0.435357	0.142	0.015	2080	180	180	403	16	20	794	57	58	49.2443								Inclusion
T #51	Output_1_31	26.539	0.727	0.052	0.0733	0.003	0.496644	13.6426	0.558359	0.0741	0.0059	0.457164	0.0741	0.0059	960	170	170	456	12	18	560	35	36	18.5714								Zircon	489	54	34	11	569900	8600	64.8	1.7	0.44	0.15	16.38	0.93	5.12	0.73	1.83	0.28	174.7
T #54	Output_1_34	22.906	10.57	0.57	0.394	0.016	0.601558	2.53807	0.103069	0.198	0.012	0.556645	0.198	0.012	2760	100	110	2140	48	73	2466	51	53	13.2198								Inclusion
T #55	Output_1_35	26.188	0.509	0.027	0.0606	0.0023	0.581892	16.5017	0.6263	0.0618	0.0036	0.545895	0.0618	0.0036	590	120	130	378.9	8.2	14	415	18	18	8.6988								Zircon	860	120	13.4	1.6	500000	16000	61.8	2.2	3.1	1.1	128.5	5.9	14.6	2.5	4.93	0.49	261.3
T #56	Output_1_36	28.192																														Inclusion
T #59	Output_1_39	26.539	0.801	0.034	0.0817	0.003	0.654242	12.2399	0.449446	0.0721	0.0034	0.614381	0.0721	0.0034	957	88	98	506	10	18	594	18	19	14.8148								Zircon	222	38	18.9	6.2	524000	13000	71	2.1	0.22	0.12	28.3	1.1	1.23	0.35	0.78	0.15	98.9
T #65	Output_1_41	26.54	0.541	0.038	0.0563	0.0022	0.486156	17.762	0.694074	0.0709	0.0051	0.47735	0.0709	0.0051	840	150	150	352.7	8.2	13	433	24	25	18.545								Zircon	419	78	34	11	526000	14000	64.6	2.2	2.2	1.3	44	3.3	4.8	1.5	1.19	0.19	106.5
T #73	Output_1_49	26.188	1.84	0.22	0.1417	0.0096	0.492986	7.05716	0.478114	0.0915	0.0096	0.542464	0.0915	0.0096	1260	210	220	851	48	54	996	86	86	14.5582								Zircon	259	39	17.9	2.1	505000	18000	57.3	2.2	-0.00322	0.0001	12.26	0.86	0.9	0.29	0.86	0.18	55.5
T #74	Output_1_50	26.539	0.663	0.053	0.0699	0.0028	0.447995	14.3062	0.573065	0.0707	0.0058	0.438771	0.0707	0.0058	800	180	190	435	11	17	512	34	34	15.0391								Zircon	411	34	8.9	1.5	499000	16000	58	2.3	0.43	0.14	39.4	1.6	4.92	0.89	2.51	0.41	127.4
T #79	Output_1_51	26.541	1.027	0.092	0.0994	0.0071	0.623436	10.0604	0.718597	0.073	0.0031	0.859564	0.073	0.0031	994	74	86	609	38	42	698	46	46	12.7507								Zircon	751	42	16.1	2.7	487000	14000	88	3.2	0.79	0.16	39.7	3.7	23.7	2.9	7.41	0.93	281
T #82	Output_1_54	15.858	3.21	0.18	0.2299	0.0094	0.589167	4.34972	0.177848	0.1	0.0057	0.582871	0.1	0.0057	1590	100	110	1333	33	49	1448	45	46	7.94199								Zircon	377	86	18.8	5.5	543000	15000	64.1	2.6	0.117	0.086	30.2	1.7	2.64	0.91	1.16	0.3	113.7
LIS-01
Autocrysts
T #106	Output_1_70	26.188	0.503	0.064	0.0662	0.0032	0.355144	15.1057	0.730187	0.0557	0.0074	0.341916	0.0557	0.0074	260	250	250	413	15	19	405	45	45	1.97531	413	19	0.503	0.064	0.0662	0.0032	0.355144	Zircon	339	36	4.3	1	503000	16000	58.1	2.4	-0.0031	0.00012	7.03	0.49	1.1	0.29	0.97	0.18	105
T #148	Output_1_100	26.539	0.525	0.062	0.0666	0.003	0.356385	15.015	0.676352	0.0578	0.0069	0.353037	0.0578	0.0069	340	240	240	416	13	18	419	42	43	0.71599	416	18	0.525	0.062	0.0666	0.003	0.356385	Zircon	431	38	5.2	1.1	492000	14000	56.1	2.3	0.008	0.012	5.7	0.43	0.51	0.21	0.59	0.11	97.4
T #151	Output_1_103	26.541	0.595	0.04	0.0718	0.0027	0.488182	13.9276	0.523739	0.061	0.0041	0.488258	0.061	0.0041	540	140	150	446.8	9.6	16	469	25	25	4.73348	446.8	16	0.595	0.04	0.0718	0.0027	0.488182	Zircon	265	38	14.8	4.2	526000	13000	62	1.9	0.04	0.031	19.36	0.88	1.32	0.33	0.53	0.12	97.5
T #87	Output_1_55	26.54	0.502	0.027	0.0689	0.0025	0.559258	14.5138	0.526625	0.0531	0.0031	0.52787	0.0531	0.0031	270	110	120	429.5	8.2	15	417	19	20	2.9976	429.5	15	0.502	0.027	0.0689	0.0025	0.559258	Zircon	793	81	10	1.5	499000	14000	57.3	2.1	7.4	1.5	31.7	2.9	10.7	1.8	2.16	0.28	89.3
T #92	Output_1_60	26.188	0.457	0.051	0.0668	0.0031	0.383969	14.9701	0.694718	0.0508	0.0064	0.345652	0.0508	0.0064	100	230	230	417	14	18	371	35	35	12.3989	417	18	0.457	0.051	0.0668	0.0031	0.383969	Zircon	308	32	11	1.5	501000	15000	58	2.1	-0.00303	0.0001	12.17	0.69	0.97	0.29	0.65	0.14	75
Xenocrysts
T #102	Output_1_66	26.187	3.03	0.12	0.2424	0.0085	0.66291	4.12541	0.144662	0.0915	0.0041	0.61629	0.0915	0.0041	1421	78	88	1399	22	44	1409	28	30	0.709723	1421	88	3.03	0.12	0.2424	0.0085	0.66291	Zircon	227	29	8.1	1.3	494000	14000	61	2.2	0.007	0.011	30.7	1.3	0.84	0.26	0.258	0.082	71.6
T #105	Output_1_69	26.188	0.789	0.054	0.0994	0.0035	0.457482	10.0604	0.354238	0.0577	0.0043	0.427201	0.0577	0.0043	440	150	160	610	11	21	588	29	29	3.7415	610	21	0.789	0.054	0.0994	0.0035	0.457482	Zircon	210	32	9.2	1.4	499000	13000	59	1.9	0.017	0.018	69.9	1.9	9.6	1	3.78	0.43	138.6
T #108	Output_1_72	26.188	3.84	0.14	0.2795	0.0095	0.681905	3.57782	0.121607	0.0993	0.0038	0.664073	0.0993	0.0038	1589	58	69	1588	22	48	1594	27	29	0.376412	1589	69	3.84	0.14	0.2795	0.0095	0.681905	Zircon	368	32	6.5	1.3	491000	15000	59.3	2.1	0.078	0.046	47.7	1.9	1.76	0.34	0.8	0.14	129.3
T #119	Output_1_79	26.538	1.167	0.055	0.1227	0.0047	0.630713	8.14996	0.312183	0.0689	0.0031	0.648247	0.0689	0.0031	853	86	97	745	17	27	780	25	26	4.48718	745	27	1.167	0.055	0.1227	0.0047	0.630713	Zircon	380	43	22.9	3	468000	14000	71.8	2.4	0.176	0.063	18.1	1.6	7.64	0.89	1.78	0.22	329
T #120	Output_1_80	26.539	0.631	0.042	0.0772	0.0028	0.47848	12.9534	0.469811	0.0591	0.0042	0.454582	0.0591	0.0042	500	150	160	479.4	9.6	17	491	26	26	2.36253	479.4	17	0.631	0.042	0.0772	0.0028	0.47848	Zircon	1080	150	8.9	1.5	492000	15000	56	2	2.41	0.59	11.1	1.9	9.2	1.8	0.276	0.086	217
T #122	Output_1_82	26.54	0.766	0.056	0.0875	0.0032	0.447389	11.4286	0.417959	0.0634	0.0048	0.43496	0.0634	0.0048	620	160	170	541	10	19	568	32	32	4.75352	541	19	0.766	0.056	0.0875	0.0032	0.447389	Zircon	626	82	13	2.4	495000	15000	57.8	2.1	9.3	1.5	66.3	3.9	22.3	2.7	3.77	0.35	102.2
T #129	Output_1_85	26.188	2.33	0.15	0.199	0.0078	0.52004	5.02513	0.196965	0.0836	0.0055	0.511827	0.0836	0.0055	1190	130	140	1169	27	42	1201	47	48	2.66445	1190	140	2.33	0.15	0.199	0.0078	0.52004	Zircon	271	28	4.7	1	475000	17000	54.7	2.3	0.0006	0.0066	7.98	0.5	2.62	0.51	1.03	0.15	126.8
T #132	Output_1_88	26.54	6.16	0.24	0.3462	0.012	0.664685	2.8885	0.100121	0.1271	0.0055	0.625175	0.1271	0.0055	2031	65	75	1915	30	58	1989	31	33	3.72046	2031	75	6.16	0.24	0.3462	0.012	0.664685	Zircon	169	31	5	1.1	475000	15000	56.7	2.3	-0.002766	9.1e-05	16.1	0.8	0.52	0.19	0.092	0.046	37.8
T #133	Output_1_89	26.54	0.597	0.053	0.0746	0.003	0.412622	13.4048	0.539068	0.0575	0.0051	0.412937	0.0575	0.0051	380	180	190	464	12	18	465	34	34	0.215054	464	18	0.597	0.053	0.0746	0.003	0.412622	Zircon	167	26	5.4	1	492000	15000	58.2	1.9	-0.002864	8.6e-05	10.79	0.66	0.7	0.23	0.368	0.098	52.2
T #135	Output_1_91	26.188	0.652	0.041	0.0749	0.0028	0.511005	13.3511	0.499108	0.0612	0.0038	0.515797	0.0612	0.0038	610	130	140	465.7	9.5	17	504	25	25	7.59921	465.7	17	0.652	0.041	0.0749	0.0028	0.511005	Zircon	299	29	2.44	0.87	501000	15000	61.7	2.2	0.0001	0.0059	19.25	0.72	1.08	0.28	0.315	0.091	117.1
T #149	Output_1_101	26.186	0.713	0.087	0.0757	0.0035	0.354331	13.21	0.610768	0.0681	0.0082	0.35846	0.0681	0.0082	630	260	260	470	16	21	523	51	52	10.1338	470	21	0.713	0.087	0.0757	0.0035	0.354331	Zircon	253	30	21.7	5.2	486000	15000	55.5	2.1	0.91	0.54	7.84	0.95	1.55	0.4	0.58	0.14	64.3
T #90	Output_1_58	26.54	0.518	0.08	0.0751	0.0036	0.296435	13.3156	0.638297	0.0523	0.0091	0.265605	0.0523	0.0091	60	300	310	466	17	22	398	54	54	17.0854	466	22	0.518	0.08	0.0751	0.0036	0.296435	Zircon	202	33	10.6	1.7	498000	16000	56.3	2.1	-0.002978	9.8e-05	6.47	0.4	0.41	0.18	0.32	0.11	48.8
Cross-contamination from above sedimentary formation
T #101	Output_1_65	26.187	0.453	0.071	0.0638	0.0034	0.321915	15.674	0.835291	0.0508	0.0076	0.335558	0.0508	0.0076	70	280	280	398	17	20	358	48	48	11.1732	398	20	0.453	0.071	0.0638	0.0034	0.321915	Zircon	450	34	3.1	0.92	495000	14000	56.1	1.9	-0.002979	8.6e-05	4.17	0.35	0.59	0.22	0.73	0.15	88.7
T #115	Output_1_75	26.539	0.503	0.072	0.0628	0.0025	0.267941	15.9236	0.6339	0.0583	0.0083	0.269292	0.0583	0.0083	270	280	290	393	10	15	392	49	49	0.255102	393	15	0.503	0.072	0.0628	0.0025	0.267941	Zircon	545	41	2.91	0.97	497000	14000	57.1	1.7	0.43	0.19	6.45	0.67	1.36	0.46	0.81	0.16	95.7
T #118	Output_1_78	26.54	0.495	0.061	0.0631	0.0027	0.328013	15.8479	0.678118	0.0555	0.0067	0.334083	0.0555	0.0067	270	240	240	394	11	16	393	41	41	0.254453	394	16	0.495	0.061	0.0631	0.0027	0.328013	Zircon	308	32	6.4	1.4	494000	18000	57.7	2.3	0.0004	0.0067	7.97	0.48	1.36	0.38	0.74	0.14	110.6
T #124	Output_1_84	26.188	0.543	0.07	0.0624	0.0028	0.328732	16.0256	0.719099	0.0626	0.0084	0.31714	0.0626	0.0084	410	250	250	390	12	17	422	44	45	7.58294	390	17	0.543	0.07	0.0624	0.0028	0.328732	Zircon	425	36	3.44	0.88	492000	16000	56.1	2.2	-0.002791	9.3e-05	6	0.35	1.05	0.25	0.74	0.15	105.7
T #136	Output_1_92	26.188	0.495	0.052	0.0631	0.0028	0.389116	15.8479	0.703233	0.0568	0.0059	0.392849	0.0568	0.0059	350	210	220	394	12	17	404	36	36	2.47525	394	17	0.495	0.052	0.0631	0.0028	0.389116	Zircon	620	200	9.4	3.3	498000	15000	60.6	2.2	3.7	2.5	15.1	3.7	5	2.8	1.23	0.24	136.8
T #138	Output_1_94	26.539	0.467	0.05	0.0618	0.0024	0.340981	16.1812	0.628397	0.0545	0.0061	0.327797	0.0545	0.0061	220	210	210	386.2	9.3	15	378	34	34	2.16931	386.2	15	0.467	0.05	0.0618	0.0024	0.340981	Zircon	230	30	6.1	1.3	500000	14000	57.7	2	0.006	0.01	13.88	0.69	0.93	0.28	0.47	0.11	65.7
T #143	Output_1_95	26.188	0.493	0.029	0.0609	0.0024	0.556588	16.4204	0.647108	0.059	0.0037	0.532075	0.059	0.0037	490	130	130	381.2	9.7	15	403	19	20	5.40943	381.2	15	0.493	0.029	0.0609	0.0024	0.556588	Zircon	486	44	15.4	2.3	486000	15000	59.7	2.4	0.195	0.062	20.6	1	12.8	1.3	10.2	1.1	197
T #145	Output_1_97	26.538	0.455	0.051	0.0622	0.0027	0.361135	16.0772	0.697884	0.0536	0.0062	0.351347	0.0536	0.0062	190	220	220	389	12	17	369	35	35	5.42005	389	17	0.455	0.051	0.0622	0.0027	0.361135	Zircon	308	35	5.2	1.1	486000	15000	56.1	2.2	0.029	0.026	7.77	0.38	2.75	0.44	1.39	0.17	146.2
T #88	Output_1_56	26.188	0.571	0.066	0.0616	0.0029	0.377208	16.2338	0.764252	0.0675	0.0079	0.373188	0.0675	0.0079	610	240	250	385	13	18	442	43	44	12.8959	385	18	0.571	0.066	0.0616	0.0029	0.377208	Inclusion
T #89	Output_1_57	26.188	0.516	0.056	0.064	0.0026	0.350574	15.625	0.634766	0.059	0.0067	0.336837	0.059	0.0067	370	220	230	400	11	16	410	37	38	2.43902	400	16	0.516	0.056	0.064	0.0026	0.350574	Zircon	383	37	6.8	1.2	502000	16000	59.1	2	0.44	0.2	9.19	0.57	1.58	0.46	1	0.18	113.8
Discordant
T #103	Output_1_67	26.541	0.812	0.065	0.0737	0.0028	0.428766	13.5685	0.515493	0.0803	0.0066	0.419579	0.0803	0.0066	1050	170	180	458.5	9.9	17	592	36	36	22.5507								Zircon	161	28	31.9	6	507000	12000	57.5	1.8	0.097	0.051	13.43	0.73	1.22	0.36	0.9	0.19	68.3
T #104	Output_1_68	26.43																														Inclusion
T #107	Output_1_71	26.187	2.75	0.34	0.0824	0.0043	0.388861	12.1359	0.633307	0.238	0.021	0.509058	0.238	0.021	3020	130	140	510	20	25	1298	79	80	60.7088								Inclusion
T #109	Output_1_73	15.858																														Inclusion
T #110	Output_1_74	17.62																														Inclusion
T #116	Output_1_76	26.54	1.52	0.16	0.1224	0.0056	0.398617	8.16994	0.373788	0.0904	0.0092	0.410031	0.0904	0.0092	1250	230	240	743	24	32	923	71	72	19.5016								Inclusion
T #117	Output_1_77	26.188	1.28	0.14	0.0767	0.0028	0.316599	13.0378	0.475957	0.119	0.012	0.340397	0.119	0.012	1770	180	190	476.6	9.5	17	815	60	60	41.5215								Inclusion
T #121	Output_1_81	26.539	0.39	0.018	0.0386	0.0014	0.617882	25.9067	0.939623	0.0721	0.0035	0.598538	0.0721	0.0035	941	90	99	244.1	5.3	9	333	13	13	26.6967								Zircon	1441	89	59.3	5.8	494000	15000	65.3	2.5	0.95	0.16	41.6	2.2	59.5	3.9	64.5	4.1	514
T #123	Output_1_83	26.539	0.886	0.075	0.0793	0.0033	0.441174	12.6103	0.524768	0.0808	0.0068	0.443246	0.0808	0.0068	1090	170	180	492	14	20	629	41	41	21.7806								Zircon	941	99	10.3	1.6	487000	14000	57	2.4	8.5	1.3	32.7	3.1	14.1	2.4	0.76	0.13	63.2
T #130	Output_1_86	26.188	1.25	0.036	0.07952	0.0026	0.750402	12.5755	0.411169	0.1124	0.0034	0.734042	0.1124	0.0034	1828	40	56	493.2	5.7	16	821	15	16	39.9269								Zircon	1960	140	68.3	7.2	461000	13000	142.5	5.1	7.81	0.54	29.3	1.3	30.1	2.8	3.19	0.37	869
T #131	Output_1_87	26.188	0.72	0.1	0.0675	0.0029	0.295518	14.8148	0.636488	0.0741	0.01	0.303354	0.0741	0.01	740	260	270	421	13	18	518	56	57	18.7259								Zircon	386	38	6.3	1.2	474000	16000	56.2	2.4	0.01	0.013	8.59	0.51	1.71	0.35	1.23	0.19	134.6
T #134	Output_1_90	26.539	1.01	0.16	0.0652	0.0029	0.270318	15.3374	0.682186	0.108	0.016	0.28755	0.108	0.016	1340	290	300	407	12	17	654	74	74	37.7676								Zircon	362	37	20.6	5.3	530000	12000	62.7	1.5	0.146	0.068	8.23	0.46	2.49	0.54	1.65	0.22	135.6
T #137	Output_1_93	26.54	0.652	0.075	0.0662	0.0029	0.355892	15.1057	0.661732	0.0718	0.0085	0.34704	0.0718	0.0085	700	250	260	413	13	18	490	47	47	15.7143								Zircon	370	36	10.3	2.2	505000	12000	58.2	1.6	-0.002994	9.2e-05	7.29	0.4	0.83	0.26	0.85	0.18	109
T #144	Output_1_96	26.187	1.73	0.11	0.1508	0.0063	0.549119	6.6313	0.277037	0.0836	0.0053	0.550247	0.0836	0.0053	1200	120	130	904	25	36	1005	39	40	10.0498								Zircon	143	36	7.3	1.4	503000	14000	56.9	1.9	-0.002862	9.6e-05	5.33	0.33	0.48	0.22	0.215	0.074	38.2
T #146	Output_1_98	26.187	2.1	0.19	0.166	0.0073	0.437148	6.0241	0.264915	0.0941	0.0091	0.41395	0.0941	0.0091	1340	200	200	989	29	40	1137	66	67	13.0167								Zircon	230	33	18.8	5	509000	14000	58	1.9	0.156	0.069	21.91	0.96	1.73	0.41	1.11	0.18	65.2
T #147	Output_1_99	26.539	9.45	0.33	0.4201	0.015	0.714923	2.38039	0.0849935	0.1634	0.0061	0.691194	0.1634	0.0061	2492	50	61	2259	38	69	2380	29	31	5.08403								Zircon	76	30	31.6	7.8	488000	12000	56.2	2.4	0.062	0.038	6.44	0.4	0.41	0.19	0.43	0.1	18.3
T #150	Output_1_102	26.188	0.829	0.087	0.0599	0.0026	0.3822	16.6945	0.724636	0.101	0.01	0.401509	0.101	0.01	1440	200	210	375	11	16	593	47	48	36.7622								Zircon	324	50	22.3	3.6	537000	13000	63	2.1	0.18	0.082	29	1.6	10.3	1.9	9.6	1.5	86.1
T #91	Output_1_59	26.541	22.32	0.66	0.609	0.024	0.799871	1.64204	0.0647108	0.2651	0.0079	0.797629	0.2651	0.0079	3269	34	48	3061	62	96	3191	27	30	4.07396								Zircon	152	39	2.76	0.88	507000	12000	58.5	1.9	-0.00325	0.00015	3.39	0.29	0.37	0.18	0.59	0.24	51.3
T #93	Output_1_61	26.188	20.17	0.93	0.506	0.02	0.650834	1.97629	0.078114	0.2886	0.011	0.719835	0.2886	0.011	3393	49	59	2634	53	84	3083	42	43	14.5637								Zircon	159	29	27.3	7.1	468000	12000	54.5	1.7	2.24	0.21	27.12	0.88	14	1.4	3.83	0.41	79.8
T #94	Output_1_62	26.188	0.807	0.08	0.0723	0.0028	0.363882	13.8313	0.53565	0.0849	0.0094	0.330169	0.0849	0.0094	1070	210	210	450	10	17	599	46	47	24.8748								Zircon	419	67	33	14	542700	9900	65.3	2	0.4	0.25	28.4	1.2	4	1.1	1.86	0.37	167.9
T #95	Output_1_63	26.187	11.35	0.31	0.4515	0.017	0.809458	2.21484	0.0833937	0.1822	0.0057	0.769151	0.1822	0.0057	2662	39	52	2399	43	74	2548	22	25	5.84772								Zircon	287	33	7.6	1.4	503000	13000	60.3	2.1	-0.003017	9.7e-05	9.66	0.53	1.97	0.42	0.199	0.067	98.3
T #96	Output_1_64	26.54	0.64	0.028	0.0741	0.0026	0.625648	13.4953	0.473519	0.0621	0.003	0.587665	0.0621	0.003	626	94	100	460.8	8.2	16	500	17	17	7.84								Zircon	770	120	5.9	1.1	504000	13000	57.2	2.1	2.2	1.4	14.5	3.1	4.1	1.5	0.7	0.16	135
ALB-01
Autocrysts
T #156	Output_1_104	26.188	0.574	0.058	0.0737	0.0032	0.394796	13.5685	0.589135	0.057	0.0054	0.416641	0.057	0.0054	350	190	190	458	14	19	449	36	36	2.00445	458	19	0.574	0.058	0.0737	0.0032	0.394796	Zircon	197	30	4.3	0.95	492000	15000	56.4	1.9	0.0003	0.006	13.91	0.84	1.52	0.36	0.92	0.17	121.8
T #160	Output_1_108	26.538	0.6	0.039	0.0766	0.003	0.516089	13.0548	0.511286	0.0586	0.0042	0.479517	0.0586	0.0042	450	150	160	475	12	18	476	26	26	0.210084	475	18	0.6	0.039	0.0766	0.003	0.516089	Zircon	212	34	3.35	0.9	479000	15000	56.1	2.3	-0.002708	8.2e-05	15.55	0.61	0.6	0.25	0.317	0.086	75.6
T #161	Output_1_109	26.54	0.521	0.043	0.0723	0.0028	0.424793	13.8313	0.53565	0.0543	0.0049	0.394379	0.0543	0.0049	270	170	180	450	10	17	424	29	30	6.13208	450	17	0.521	0.043	0.0723	0.0028	0.424793	Zircon	351	36	7.3	1.3	476000	18000	55.6	2.2	-0.00268	0.0001	20.8	1	1.6	0.42	0.7	0.13	125.5
T #164	Output_1_112	26.539	0.584	0.063	0.074	0.003	0.351783	13.5135	0.547845	0.0592	0.0068	0.33282	0.0592	0.0068	370	230	230	460	12	18	453	40	40	1.54525	460	18	0.584	0.063	0.074	0.003	0.351783	Zircon	318	29	7.5	1.5	489000	16000	55.4	2.2	0.264	0.073	17.74	0.93	2.79	0.53	0.87	0.17	138.8
T #165	Output_1_113	26.539	0.556	0.035	0.0713	0.0026	0.501254	14.0252	0.51144	0.057	0.0037	0.489776	0.057	0.0037	430	140	150	443.7	8.6	16	444	23	23	0.0675676	443.7	16	0.556	0.035	0.0713	0.0026	0.501254	Zircon	324	33	3.05	0.83	489000	16000	58.5	2.3	0.194	0.061	19.9	0.75	1.95	0.38	0.38	0.11	113.9
T #170	Output_1_114	26.188	0.546	0.03	0.0707	0.0027	0.570731	14.1443	0.540163	0.0565	0.0031	0.571276	0.0565	0.0031	420	110	120	440	10	17	439	19	19	0.22779	440	17	0.546	0.03	0.0707	0.0027	0.570731	Zircon	712	53	11.6	1.6	486000	15000	59.3	2.4	0.63	0.14	22.2	1.3	7.7	1.3	2.22	0.34	223
T #171	Output_1_115	26.187	0.544	0.046	0.0731	0.0028	0.412623	13.6799	0.52399	0.0546	0.0047	0.406543	0.0546	0.0047	290	180	180	455	11	17	438	29	29	3.88128	455	17	0.544	0.046	0.0731	0.0028	0.412623	Inclusion
T #173	Output_1_117	26.188	0.587	0.024	0.0748	0.0025	0.632902	13.369	0.446824	0.0571	0.0025	0.606779	0.0571	0.0025	471	87	99	465.2	6.2	15	470	15	16	1.02128	465.2	15	0.587	0.024	0.0748	0.0025	0.632902	Zircon	299	33	2.56	0.83	496000	13000	61.9	2	1.25	0.2	23.9	1.3	5.7	0.84	0.57	0.12	121.5
T #174	Output_1_118	26.188	0.543	0.036	0.07	0.0028	0.516593	14.2857	0.571429	0.0567	0.004	0.493232	0.0567	0.004	390	140	140	436	11	17	435	23	24	0.229885	436	17	0.543	0.036	0.07	0.0028	0.516593	Zircon	421	39	12.5	2.3	484000	15000	58.5	2	0.42	0.12	31.5	1.3	6.3	1.3	2.22	0.37	156
T #176	Output_1_120	26.188	0.635	0.029	0.0758	0.0028	0.628879	13.1926	0.487326	0.0614	0.0031	0.590473	0.0614	0.0031	602	97	110	470.7	9.2	17	499	18	19	5.67134	470.7	17	0.635	0.029	0.0758	0.0028	0.628879	Zircon	272	31	11.7	9.1	482000	13000	56.9	1.9	0.166	0.06	12.07	0.9	1.22	0.32	0.272	0.09	85.3
T #178	Output_1_122	26.188	0.587	0.041	0.0744	0.0027	0.461053	13.4409	0.487773	0.0577	0.0043	0.437814	0.0577	0.0043	420	150	160	462.8	9	16	463	26	26	0.0431965	462.8	16	0.587	0.041	0.0744	0.0027	0.461053	Inclusion
T #184	Output_1_124	26.188	0.552	0.053	0.0746	0.003	0.386321	13.4048	0.539068	0.053	0.0051	0.385597	0.053	0.0051	240	190	200	464	12	18	436	34	34	6.42202	464	18	0.552	0.053	0.0746	0.003	0.386321	Zircon	160	32	5.8	1.2	505000	15000	58	2.1	-0.002794	8.7e-05	10.36	0.52	0.7	0.23	0.56	0.12	50.6
T #186	Output_1_126	26.188	0.568	0.043	0.0725	0.0029	0.46717	13.7931	0.551724	0.0578	0.0047	0.4414	0.0578	0.0047	410	170	170	451	12	18	454	29	29	0.660793	451	18	0.568	0.043	0.0725	0.0029	0.46717	Zircon	295	41	6.1	1.2	489000	15000	56.7	2.3	0.017	0.02	17.01	0.7	1.05	0.26	0.56	0.11	93.6
T #188	Output_1_128	26.188	0.599	0.034	0.0735	0.003	0.583817	13.6054	0.555324	0.0592	0.0039	0.526676	0.0592	0.0039	490	130	140	457	12	18	473	21	22	3.38266	457	18	0.599	0.034	0.0735	0.003	0.583817	Zircon	1309	85	15.8	2.4	486000	17000	58	2.4	2.95	0.32	35.2	2.5	20.7	1.9	2.88	0.35	362
T #189	Output_1_129	26.54	0.553	0.03	0.0718	0.0026	0.555181	13.9276	0.504341	0.0552	0.0031	0.541913	0.0552	0.0031	370	110	120	447	8.3	16	444	20	20	0.675676	447	16	0.553	0.03	0.0718	0.0026	0.555181	Zircon	416	38	5	1.2	488000	13000	58.8	2	1.41	0.33	26.8	1.2	3.85	0.68	0.56	0.11	121.2
T #190	Output_1_130	26.54	0.571	0.063	0.0714	0.0032	0.376343	14.0056	0.627702	0.0585	0.0065	0.374077	0.0585	0.0065	360	220	230	444	14	19	450	43	43	1.33333	444	19	0.571	0.063	0.0714	0.0032	0.376343	Zircon	270	28	7.8	1.3	470000	13000	54.5	1.9	0.0009	0.0072	13.87	0.68	0.99	0.27	0.66	0.13	77.2
T #200	Output_1_136	26.54	0.582	0.031	0.0693	0.0027	0.590381	14.43	0.562208	0.0609	0.0033	0.583774	0.0609	0.0033	570	110	120	431.9	9.9	16	462	19	20	6.51515	431.9	16	0.582	0.031	0.0693	0.0027	0.590381	Zircon	1604	83	12.7	2	471000	15000	55.9	2.1	0.104	0.05	4.87	0.89	8.5	1.8	5.5	1	286
T #202	Output_1_138	26.188	0.572	0.057	0.0723	0.0028	0.36224	13.8313	0.53565	0.0572	0.0056	0.36784	0.0572	0.0056	340	190	200	450	11	17	447	36	36	0.671141	450	17	0.572	0.057	0.0723	0.0028	0.36224	Zircon	1420	220	7	1.3	494000	17000	57.3	2	6.2	1.3	33.9	3.9	16.7	3.1	1.72	0.26	148.9
T #203	Output_1_139	26.539	0.588	0.05	0.0734	0.0029	0.42137	13.624	0.538277	0.0581	0.005	0.417231	0.0581	0.005	410	180	190	457	11	17	460	32	33	0.652174	457	17	0.588	0.05	0.0734	0.0029	0.42137	Zircon	324	32	4.7	1.2	472000	17000	55.6	1.8	0.01	0.013	16.21	0.83	1.18	0.28	0.57	0.13	95.4
T #205	Output_1_141	26.188	0.572	0.063	0.0738	0.0032	0.36632	13.5501	0.58754	0.0576	0.0066	0.353925	0.0576	0.0066	320	230	230	459	14	19	451	42	42	1.77384	459	19	0.572	0.063	0.0738	0.0032	0.36632	Zircon	709	73	9.5	1.7	485000	16000	54.1	2.1	0.78	0.41	9.4	1.1	3.11	0.72	0.67	0.16	133.1
T #206	Output_1_142	26.188	0.577	0.029	0.0745	0.0027	0.584883	13.4228	0.486465	0.0561	0.0031	0.548426	0.0561	0.0031	420	110	120	463	9.2	16	460	18	19	0.652174	463	16	0.577	0.029	0.0745	0.0027	0.584883	Zircon	1532	74	7.5	1.4	490000	14000	57	2.1	-0.002655	8.2e-05	0.96	0.16	0.79	0.24	0.125	0.058	280.6
T #213	Output_1_145	26.188	0.583	0.042	0.0728	0.0029	0.4839	13.7363	0.547186	0.0587	0.0042	0.486436	0.0587	0.0042	460	140	150	453	11	17	460	26	27	1.52174	453	17	0.583	0.042	0.0728	0.0029	0.4839	Zircon	342	43	4.8	1.1	482000	15000	58.6	1.9	0.44	0.11	20.8	1	1.71	0.36	0.41	0.11	103.6
T #215	Output_1_147	26.539	0.553	0.047	0.07	0.003	0.450251	14.2857	0.612245	0.0576	0.0048	0.457348	0.0576	0.0048	400	170	170	436	13	18	439	30	31	0.683371	436	18	0.553	0.047	0.07	0.003	0.450251	Zircon	640	120	8	1.6	473000	15000	55.1	1.7	6.4	2	27.3	5.5	9.6	2.9	0.7	0.16	69.2
T #216	Output_1_148	26.54	0.59	0.022	0.07219	0.0024	0.665488	13.8523	0.460529	0.0601	0.0024	0.639818	0.0601	0.0024	575	75	87	449.3	5.5	14	469	13	14	4.20043	449.3	14	0.59	0.022	0.07219	0.0024	0.665488	Zircon	978	47	17.3	4.8	501000	14000	68.3	2.3	1.35	0.29	31.9	1.6	7.8	1.2	0.73	0.11	320.8
T #217	Output_1_149	26.188	0.536	0.052	0.0744	0.003	0.383802	13.4409	0.54197	0.0528	0.0051	0.385237	0.0528	0.0051	230	190	200	462	12	18	431	35	35	7.19258	462	18	0.536	0.052	0.0744	0.003	0.383802	Zircon	301	42	3.7	1.1	486000	15000	57.3	2.1	0.161	0.088	16.34	0.81	1.6	0.44	0.57	0.12	104
T #218	Output_1_150	26.539	0.561	0.033	0.0699	0.0024	0.504101	14.3062	0.491198	0.0588	0.0036	0.489135	0.0588	0.0036	490	120	130	435.5	6.3	14	448	21	22	2.79018	435.5	14	0.561	0.033	0.0699	0.0024	0.504101	Zircon	513	62	5.4	1.2	475000	15000	58	2.4	0.73	0.25	27.1	1.3	2.92	0.54	0.97	0.14	127.1
T #221	Output_1_153	26.188	0.537	0.05	0.0745	0.003	0.39695	13.4228	0.540516	0.0528	0.005	0.391324	0.0528	0.005	260	190	200	463	11	18	427	32	33	8.43091	463	18	0.537	0.05	0.0745	0.003	0.39695	Zircon	262	37	7.4	1.3	485000	14000	56	2.3	-0.002698	8.3e-05	11.82	0.59	0.76	0.24	0.45	0.13	77.8
T #227	Output_1_155	26.189	0.568	0.04	0.0758	0.0028	0.464513	13.1926	0.487326	0.0559	0.0043	0.432886	0.0559	0.0043	380	150	150	470.9	9.7	17	455	24	25	3.49451	470.9	17	0.568	0.04	0.0758	0.0028	0.464513	Zircon	438	46	4.2	1.1	481000	15000	58.9	2.2	0.51	0.13	20.4	1.6	2.99	0.64	0.9	0.17	142.8
T #228	Output_1_156	26.189	0.524	0.039	0.0744	0.0028	0.451244	13.4409	0.505839	0.0526	0.0041	0.434795	0.0526	0.0041	230	160	160	463	10	17	422	26	26	9.71564	463	17	0.524	0.039	0.0744	0.0028	0.451244	Zircon	359	44	4.7	1.1	476000	15000	56.6	2	0.85	0.18	24.8	1	3.43	0.56	0.6	0.13	95
Xenocrysts
T #158	Output_1_106	26.538	1.71	0.16	0.1648	0.0075	0.437392	6.06796	0.276151	0.0768	0.0076	0.417821	0.0768	0.0076	920	220	220	982	31	42	978	62	63	0.408998	982	42	1.71	0.16	0.1648	0.0075	0.437392	Zircon	147	28	13.7	2.1	491000	15000	56.5	2.4	0.002	0.0066	13.48	0.77	2.82	0.48	0.172	0.058	40.3
T #162	Output_1_110	26.188	0.676	0.058	0.0876	0.0034	0.412159	11.4155	0.443068	0.0572	0.0053	0.386358	0.0572	0.0053	360	180	190	541	13	20	514	34	35	5.25292	541	20	0.676	0.058	0.0876	0.0034	0.412159	Zircon	134	27	11.1	1.3	488000	14000	59.9	2	0.014	0.014	30.3	1.2	1.81	0.4	0.77	0.13	48.2
T #179	Output_1_123	26.539	1.887	0.078	0.182	0.0062	0.635985	5.49451	0.187175	0.0743	0.0029	0.657562	0.0743	0.0029	1048	67	78	1077	15	34	1070	26	27	0.654206	1048	78	1.887	0.078	0.182	0.0062	0.635985	Zircon	441	38	5.3	1.1	497000	14000	55.7	1.9	-0.00281	0.00011	1.67	0.2	0.81	0.26	0.149	0.059	116.8
T #185	Output_1_125	26.187	0.83	0.041	0.0991	0.0036	0.592445	10.0908	0.366569	0.0608	0.0033	0.556212	0.0608	0.0033	570	110	120	609	12	21	609	22	23	0	609	21	0.83	0.041	0.0991	0.0036	0.592445	Zircon	564	65	7.1	1.4	507000	13000	66.1	2.1	2.5	0.49	40.9	1.6	6.8	1.1	0.59	0.14	131.5
T #192	Output_1_132	26.187	0.714	0.079	0.0917	0.004	0.366767	10.9051	0.475687	0.0577	0.0067	0.351663	0.0577	0.0067	330	220	230	565	17	24	536	48	49	5.41045	565	24	0.714	0.079	0.0917	0.004	0.366767	Zircon	290	110	14.3	2	477000	13000	54.6	2.1	3.1	1.8	42.7	4.5	15.2	2.2	8.74	0.54	105.6
T #199	Output_1_135	26.188	0.866	0.072	0.0907	0.0035	0.421	11.0254	0.425455	0.0693	0.0061	0.401506	0.0693	0.0061	740	190	190	559	13	21	619	40	40	9.69305	559	21	0.866	0.072	0.0907	0.0035	0.421	Zircon	351	39	34	11	503000	14000	60.2	2.1	0.069	0.049	11.44	0.6	1.4	0.31	0.72	0.16	89
T #214	Output_1_146	26.188	0.61	0.068	0.0794	0.0035	0.367723	12.5945	0.555171	0.0556	0.006	0.378148	0.0556	0.006	300	210	220	492	15	21	467	42	42	5.35332	492	21	0.61	0.068	0.0794	0.0035	0.367723	Zircon	193	33	9.5	1.6	493000	16000	57.1	2.2	-0.002744	8.5e-05	14.82	0.6	0.76	0.25	0.46	0.1	44.2
Pb loss
T #157	Output_1_105	26.187	0.484	0.036	0.0616	0.0026	0.493535	16.2338	0.685191	0.0575	0.0037	0.54847	0.0575	0.0037	450	130	140	385	11	16	400	25	25	3.75	385	16	0.484	0.036	0.0616	0.0026	0.493535	Zircon	642	50	16.9	2.2	489000	14000	58.2	2	1.75	0.26	30.9	1.7	12.8	1.7	2.79	0.46	186
T #187	Output_1_127	26.188	0.412	0.029	0.0538	0.0023	0.519113	18.5874	0.794627	0.0554	0.004	0.509489	0.0554	0.004	340	150	150	337.8	9.5	14	346	20	21	2.36994	337.8	14	0.412	0.029	0.0538	0.0023	0.519113	Zircon	1169	67	7.5	1.5	494000	12000	56.8	1.6	0.071	0.035	7.34	0.89	4.2	1	3.09	0.83	259
T #207	Output_1_143	26.188	0.376	0.024	0.0472	0.0021	0.571828	21.1864	0.942617	0.0581	0.0034	0.605225	0.0581	0.0034	460	120	130	297.5	9	13	322	17	17	7.6087	297.5	13	0.376	0.024	0.0472	0.0021	0.571828	Inclusion
Discordant
T #159	Output_1_107	26.539	1.81	0.15	0.1264	0.0071	0.561061	7.91139	0.44439	0.1044	0.0062	0.687161	0.1044	0.0062	1660	100	110	766	34	40	1033	56	56	25.847								Zircon	634	38	10.7	1.8	479000	17000	57	2.5	0.94	0.18	17	1.3	11.1	1.5	0.77	0.16	181.1
T #163	Output_1_111	26.188	0.466	0.027	0.0555	0.002	0.528138	18.018	0.649298	0.0621	0.0036	0.527934	0.0621	0.0036	610	120	130	348.4	6.2	12	386	18	19	9.74093								Inclusion
T #172	Output_1_116	26.188	4.9	0.18	0.2715	0.0098	0.700876	3.68324	0.132949	0.131	0.0048	0.701784	0.131	0.0048	2102	54	66	1547	27	50	1795	29	30	13.8162								Zircon	403	27	6.3	1.3	497000	15000	56.3	2	0.17	0.12	4.08	0.37	1.87	0.41	0.25	0.1	94.5
T #175	Output_1_119	26.54	0.613	0.04	0.0677	0.0026	0.507223	14.7711	0.567278	0.0664	0.0048	0.469166	0.0664	0.0048	710	150	150	421.9	9.8	16	480	25	25	12.1042								Zircon	336	36	12	1.9	480000	17000	56.9	2.2	3.74	0.37	32.3	1.4	10.9	1.1	0.69	0.13	117
T #177	Output_1_121	26.539	3.49	0.34	0.0918	0.0042	0.425085	10.8933	0.498384	0.267	0.02	0.521247	0.267	0.02	3190	120	120	565	18	24	1472	76	76	61.6168								Inclusion
T #191	Output_1_131	26.188	0.786	0.067	0.0723	0.0028	0.413637	13.8313	0.53565	0.0797	0.007	0.403459	0.0797	0.007	1020	180	190	450	11	17	583	39	40	22.813								Zircon	1018	80	20.9	4.2	525600	8400	60.7	1.6	1.34	0.28	7.58	0.99	5.8	1	0.58	0.18	228
T #193	Output_1_133	26.188	0.695	0.035	0.063	0.0023	0.586937	15.873	0.579491	0.0791	0.0037	0.615267	0.0791	0.0037	1132	83	93	393.5	8	14	532	20	20	26.0338								Inclusion
T #198	Output_1_134	26.188	2.63	0.11	0.1906	0.0075	0.685223	5.24659	0.20645	0.0995	0.0039	0.708487	0.0995	0.0039	1591	62	73	1124	26	41	1302	30	31	13.6713								Zircon	483	44	11.9	1.7	487000	16000	55.6	2.1	0.036	0.021	18.9	1.1	3.47	0.47	1.39	0.21	60.9
T #201	Output_1_137	26.539	0.613	0.031	0.0713	0.0025	0.569786	14.0252	0.491769	0.0623	0.0034	0.540533	0.0623	0.0034	620	110	120	443.9	7.4	15	482	19	19	7.90456								Zircon	726	52	20.2	2.9	466000	17000	57	2.5	3.92	0.51	53.1	2.3	15.8	1.6	3.15	0.34	465
T #204	Output_1_140	26.188	0.81	0.041	0.0478	0.002	0.637123	20.9205	0.875335	0.123	0.0066	0.614916	0.123	0.0066	1951	88	96	300.8	8.1	12	598	22	22	49.699								Inclusion
T #212	Output_1_144	29.954																														Inclusion
T #219	Output_1_151	19.382																														Inclusion
T #220	Output_1_152	26.188	0.77	0.12	0.0698	0.0033	0.290302	14.3267	0.677334	0.086	0.012	0.320905	0.086	0.012	980	280	280	435	15	20	581	68	69	25.1291								Inclusion
T #226	Output_1_154	25.836	4	1.5	0.09	0.013	0.359442	11.1111	1.60494	0.206	0.033	0.669655	0.206	0.033	2580	230	230	564	78	80	1230	190	190	54.1463								Inclusion
T #229	Output_1_157	26.539	15.82	0.56	0.4888	0.018	0.720934	2.04583	0.0753373	0.2417	0.0076	0.760482	0.2417	0.0076	3120	39	52	2563	41	77	2862	32	34	10.4472								Zircon	398	46	7.7	1.1	470000	13000	56.7	2.1	0.56	0.22	11.49	0.95	1.82	0.39	0.53	0.1	73.4
NOC-01
Autocrysts
T #249	Output_1_169	26.186	0.428	0.023	0.0599	0.0021	0.546396	16.6945	0.585283	0.0531	0.0029	0.540207	0.0531	0.0029	280	100	110	375	6.6	13	360	15	16	4.16667	375	13	0.428	0.023	0.0599	0.0021	0.546396	Zircon	1506	73	43	6.2	506000	11000	58.5	2	6.18	0.53	66.7	4.8	70.3	5.9	11	1.1	581
T #263	Output_1_179	26.185	0.453	0.014	0.05884	0.0019	0.72244	16.9952	0.548793	0.0562	0.0019	0.690698	0.0562	0.0019	449	63	79	368.5	4.3	12	378.7	9.1	9.9	2.69342	368.5	12	0.453	0.014	0.05884	0.0019	0.72244	Zircon	1484	94	6.5	1.3	503000	11000	58	1.8	1.66	0.32	10.5	1.1	8.3	1.4	1.87	0.35	226.1
T #285	Output_1_195	26.188	0.466	0.025	0.0601	0.0022	0.563625	16.6389	0.609079	0.0561	0.0033	0.528347	0.0561	0.0033	390	120	130	376.4	7	13	386	17	17	2.48705	376.4	13	0.466	0.025	0.0601	0.0022	0.563625	Zircon	974	61	12.9	7.4	501000	13000	58.3	2.2	0.8	0.16	8.2	0.62	11.2	1.1	2.35	0.26	236.9
Xenocrysts
T #241	Output_1_165	26.188	4.16	0.14	0.282	0.011	0.75715	3.5461	0.138323	0.1099	0.0039	0.739696	0.1099	0.0039	1780	54	67	1600	31	53	1661	26	28	3.67249	1780	67	4.16	0.14	0.282	0.011	0.75715	Zircon	777	78	26.8	7.3	520000	12000	60	2	2.45	0.4	30.6	2.8	20.5	2.3	4.48	0.49	116.7
T #251	Output_1_171	26.186	0.528	0.031	0.0674	0.0023	0.502507	14.8368	0.5063	0.0585	0.0036	0.484954	0.0585	0.0036	470	120	130	420.5	6.8	14	427	20	21	1.52225	420.5	14	0.528	0.031	0.0674	0.0023	0.502507	Zircon	1352	76	42	11	519000	11000	58.5	1.8	0.167	0.067	3.06	0.28	4.67	0.65	0.69	0.14	373.4
T #253	Output_1_173	26.539	0.69	0.21	0.0813	0.0065	0.254075	12.3001	0.983405	0.078	0.024	0.251489	0.078	0.024	0	590	590	502	36	39	390	140	140	28.7179	502	39	0.69	0.21	0.0813	0.0065	0.254075	Zircon	283	39	30.2	2.6	516000	13000	58	1.8	0.016	0.017	6.1	0.37	4.63	0.63	0.214	0.071	26.8
T #254	Output_1_174	26.189	0.495	0.043	0.0671	0.0025	0.394173	14.9031	0.555258	0.0549	0.005	0.378633	0.0549	0.005	290	180	190	418.6	9.1	15	400	30	30	4.65	418.6	15	0.495	0.043	0.0671	0.0025	0.394173	Zircon	1462	61	20.2	2.1	494000	16000	56.9	2.2	0.07	0.043	3.78	0.27	5.65	0.77	0.75	0.13	351.2
T #256	Output_1_176	26.186	0.697	0.047	0.0831	0.0034	0.518735	12.0337	0.492353	0.0614	0.0042	0.513317	0.0614	0.0042	600	150	160	514	13	20	530	28	29	3.01887	514	20	0.697	0.047	0.0831	0.0034	0.518735	Zircon	235	45	16	2.9	534000	11000	60.9	1.5	0.112	0.05	1.25	0.22	0.32	0.17	0.207	0.081	51.3
T #262	Output_1_178	26.188	0.512	0.043	0.0652	0.0024	0.401429	15.3374	0.564568	0.0578	0.005	0.391547	0.0578	0.005	390	170	170	407.2	7.9	14	412	28	29	1.16505	407.2	14	0.512	0.043	0.0652	0.0024	0.401429	Zircon	854	53	15.7	2.2	493000	15000	56.9	1.7	-0.002588	9.1e-05	3.49	0.28	3.25	0.56	0.54	0.14	238.1
T #264	Output_1_180	26.186	6.99	0.2	0.3704	0.013	0.775077	2.69978	0.0947548	0.1374	0.0044	0.738716	0.1374	0.0044	2198	43	56	2030	26	59	2106	23	26	3.60874	2198	56	6.99	0.2	0.3704	0.013	0.775077	Zircon	493	45	11.9	2.1	526000	11000	60.6	2	0.042	0.03	16.3	0.79	4.46	0.63	1.32	0.2	193.9
T #267	Output_1_182	26.189	0.6	0.041	0.0732	0.0028	0.488455	13.6612	0.52256	0.0603	0.0044	0.464291	0.0603	0.0044	510	140	150	455	10	17	472	25	26	3.60169	455	17	0.6	0.041	0.0732	0.0028	0.488455	Zircon	452	47	12.2	1.8	524000	12000	62.2	1.8	1.54	0.6	20	1.3	7	1.2	1.34	0.19	209.1
T #268	Output_1_183	26.188	0.543	0.031	0.0665	0.0023	0.518152	15.0376	0.520097	0.0599	0.0037	0.488555	0.0599	0.0037	530	130	130	414.8	7.1	14	437	20	20	5.08009	414.8	14	0.543	0.031	0.0665	0.0023	0.518152	Zircon	1178	67	48	12	525000	15000	59.1	2.1	0.179	0.06	1.83	0.21	4	0.64	0.342	0.093	295.1
T #282	Output_1_192	26.188	0.731	0.081	0.0923	0.0038	0.348284	10.8342	0.446047	0.0576	0.0064	0.347447	0.0576	0.0064	330	210	210	569	15	22	545	47	48	4.40367	569	22	0.731	0.081	0.0923	0.0038	0.348284	Zircon	200	39	25.3	2.7	528000	13000	58.7	2.1	0.247	0.089	11.67	0.6	14.6	1.5	2.37	0.27	132.2
T #294	Output_1_200	26.188	0.77	0.14	0.076	0.0053	0.358115	13.1579	0.91759	0.0678	0.0068	0.570879	0.0678	0.0068	750	180	180	471	28	31	540	61	61	12.7778	471	31	0.77	0.14	0.076	0.0053	0.358115	Zircon	1127	61	4.15	0.99	505000	13000	58.2	2	0.0001	0.0059	0.79	0.13	1.07	0.29	0.153	0.07	231.7
T #297	Output_1_203	26.539	1.83	0.17	0.1683	0.0067	0.393896	5.94177	0.236541	0.0787	0.0079	0.368654	0.0787	0.0079	940	210	210	1002	24	37	1022	63	64	1.95695	940	210	1.83	0.17	0.1683	0.0067	0.393896	Zircon	152	31	10.5	3.1	504000	15000	56.8	2.1	0.0037	0.009	12.97	0.65	0.63	0.22	0.53	0.12	34.1
T #300	Output_1_206	26.188	0.514	0.053	0.0659	0.0026	0.35736	15.1745	0.598691	0.0562	0.0058	0.357088	0.0562	0.0058	310	210	220	411	9.8	16	410	35	35	0.243902	411	16	0.514	0.053	0.0659	0.0026	0.35736	Zircon	1032	73	19.4	2.6	508000	13000	58	2	0.085	0.051	2.78	0.31	4.64	0.68	1.2	0.22	259
Pb loss
T #234	Output_1_158	25.836	0.177	0.025	0.0306	0.0014	0.308158	32.6797	1.49515	0.0423	0.006	0.306975	0.0423	0.006	-170	250	250	194.5	6.7	8.9	165	23	23	17.8788	194.5	8.9	0.177	0.025	0.0306	0.0014	0.308158	Zircon	655	57	7.5	1.3	480000	13000	56.6	1.9	0.0011	0.0076	30.1	2.7	1.94	0.46	1.95	0.26	142
Discordant
T #235	Output_1_159	21.144																														Inclusion
T #236	Output_1_160	28.192																														Inclusion
T #237	Output_1_161	19.382																														Inclusion
T #238	Output_1_162	26.188	0.346	0.019	0.0386	0.0029	0.807335	25.9067	1.94636	0.0691	0.0031	0.858576	0.0691	0.0031	860	82	92	244	16	18	300	14	14	18.6667								Inclusion
T #239	Output_1_163	17.62																														Inclusion
T #240	Output_1_164	29.954																														Inclusion
T #242	Output_1_166	25.836	1.326	0.089	0.105	0.0039	0.484192	9.52381	0.353741	0.0935	0.0062	0.488695	0.0935	0.0062	1450	130	130	644	13	23	859	41	41	25.0291								Zircon	583	77	88	11	540000	11000	65.6	1.8	1.53	0.44	42.1	3.5	44.1	3.9	19.9	1.7	254
T #243	Output_1_167	26.539	10.58	0.3	0.433	0.015	0.773827	2.30947	0.0800047	0.1818	0.0059	0.729786	0.1818	0.0059	2657	42	55	2318	34	68	2481	24	27	6.56993								Zircon	691	56	22.8	6.8	510000	12000	60.1	1.8	0.135	0.054	21.6	1.1	5.9	0.84	3.2	0.36	153.3
T #248	Output_1_168	26.188	0.678	0.053	0.0654	0.0027	0.467001	15.2905	0.63126	0.078	0.0066	0.438497	0.078	0.0066	980	170	180	408	11	17	516	31	32	20.9302								Zircon	771	62	31.4	4.5	479000	16000	53.6	2.1	5.5	2.4	13.9	4.7	9.6	2.4	1.76	0.28	176.1
T #250	Output_1_170	21.144																														Inclusion
T #252	Output_1_172	26.188	4.86	0.31	0.217	0.012	0.655055	4.6083	0.254837	0.1652	0.0078	0.760506	0.1652	0.0078	2503	66	73	1262	53	64	1767	57	58	28.5795								Zircon	863	69	71.4	9.4	538000	10000	62.5	1.8	0.44	0.13	5.46	0.56	1.48	0.43	0.41	0.14	94.5
T #255	Output_1_175	10.572																														Inclusion
T #257	Output_1_177	31.716																														Inclusion
T #266	Output_1_181	22.906																														Inclusion
T #269	Output_1_184	14.096																														Inclusion
T #270	Output_1_185	17.62																														Inclusion
T #272	Output_1_186	22.906																														Inclusion
T #273	Output_1_187	22.906																														Inclusion
T #278	Output_1_188	26.43																														Inclusion
T #279	Output_1_189	29.954																														Inclusion
T #280	Output_1_190	15.858																														Inclusion
T #281	Output_1_191	15.858																														Inclusion
T #283	Output_1_193	12.334																														Inclusion
T #284	Output_1_194	26.188	2.96	0.15	0.1841	0.0079	0.646223	5.43183	0.233088	0.1152	0.0047	0.724723	0.1152	0.0047	1858	63	74	1088	31	43	1384	39	40	21.3873								Zircon	408	59	9.5	2.4	529000	10000	60.7	2.2	0.163	0.091	7.58	0.59	2.37	0.5	1.43	0.27	109.5
T #286	Output_1_196	25.836	0.594	0.056	0.0637	0.0027	0.410058	15.6986	0.665403	0.0672	0.0063	0.41197	0.0672	0.0063	670	200	210	398	12	16	462	36	37	13.8528								Zircon	692	66	50	12	563000	12000	64.2	2	0.163	0.074	2.25	0.39	4.1	1.4	0.44	0.13	179.4
T #287	Output_1_197	25.133	1.238	0.064	0.0744	0.004	0.720829	13.4409	0.722627	0.1224	0.0077	0.649689	0.1224	0.0077	1920	110	110	462	20	24	811	29	29	43.0333								Inclusion
T #292	Output_1_198	32.764																														Inclusion
T #293	Output_1_199	26.188	0.603	0.029	0.0693	0.0024	0.584362	14.43	0.499741	0.0622	0.0032	0.558424	0.0622	0.0032	640	100	110	431.6	6.4	14	479	19	19	9.89562								Zircon	1521	72	3.6	1.2	509000	12000	58.1	2	0.151	0.062	2.34	0.39	2.38	0.61	0.43	0.12	314.7
T #295	Output_1_201	26.188	0.373	0.021	0.03382	0.0014	0.592375	29.5683	1.224	0.0792	0.005	0.548339	0.0792	0.005	1100	120	120	214.4	5.5	8.5	320	15	15	33								Inclusion
T #296	Output_1_202	26.188	0.555	0.031	0.0627	0.0023	0.548941	15.949	0.58505	0.0632	0.0035	0.552226	0.0632	0.0035	660	120	120	392	7.5	14	448	20	21	12.5								Zircon	1247	85	21.4	6.7	547000	10000	61.5	1.8	6.96	0.9	40.2	4.8	43.6	5.7	7.6	1.2	373
T #298	Output_1_204	24.573																														Inclusion
T #299	Output_1_205	30.716																														Inclusion
T #301	Output_1_207	38.907																														Inclusion
T #306	Output_1_208	32.764																														Inclusion
T #307	Output_1_209	20.912	0.356	0.03	0.0236	0.0016	0.62684	42.3729	2.87274	0.1067	0.0091	0.622274	0.1067	0.0091	1680	170	180	150.5	9.1	10	305	22	22	50.6557								Inclusion
T #308	Output_1_210	24.573																														Inclusion
T #309	Output_1_211	32.764	4060	570	27.3	3.8	0.704066	0.03663	0.00509869	1.049	0.044	0.957473	1.049	0.044	5524	87	100	20890	860	880	8300	150	150	151.687								Inclusion
T #310	Output_1_212	26.188	0.522	0.031	0.0556	0.0026	0.618651	17.9856	0.841054	0.0674	0.0039	0.628554	0.0674	0.0039	780	120	130	349	12	16	423	20	21	17.4941								Zircon	1720	170	35	4.6	475000	13000	60.6	2.3	3.09	0.47	39.8	3.5	39.3	4.7	8	1	640
OMI-01
Autocrysts
T #331	Output_1_225	26.19	0.465	0.032	0.0574	0.0022	0.486571	17.4216	0.667727	0.06	0.0041	0.489195	0.06	0.0041	540	150	160	359.5	7.9	13	387	23	24	7.10594	359.5	13	0.465	0.032	0.0574	0.0022	0.486571	Zircon	474	41	10.9	2.1	477000	15000	59	2	0.45	0.1	21.2	1.6	6	1	4.22	0.56	157
T #347	Output_1_237	26.541	0.442	0.03	0.0591	0.0024	0.513428	16.9205	0.687126	0.0559	0.0041	0.484383	0.0559	0.0041	350	150	150	370.1	9.5	14	368	21	21	0.570652	370.1	14	0.442	0.03	0.0591	0.0024	0.513428	Zircon	292	32	7.3	1.3	454000	13000	53.8	2.1	0.049	0.029	17.46	0.87	3.98	0.54	2.47	0.29	160.4
T #348	Output_1_238	26.188	0.431	0.031	0.0594	0.0024	0.489762	16.835	0.680203	0.0541	0.0041	0.470453	0.0541	0.0041	350	150	150	372.1	9.7	15	364	20	21	2.22527	372.1	15	0.431	0.031	0.0594	0.0024	0.489762	Zircon	357	34	8.2	1.6	480000	15000	57.1	2.3	0.144	0.061	15.5	1.1	4.71	0.91	2.93	0.46	115.7
T #357	Output_1_243	25.836	0.451	0.045	0.0599	0.0033	0.483358	16.6945	0.91973	0.0564	0.0053	0.505754	0.0564	0.0053	370	200	200	374	17	20	381	34	34	1.83727	374	20	0.451	0.045	0.0599	0.0033	0.483358	Zircon	241	35	4.7	1.4	495000	13000	57	2.2	-0.002726	9.3e-05	10.09	0.62	1.59	0.37	0.72	0.16	86.4
T #371	Output_1_253	26.537	0.474	0.029	0.0591	0.0023	0.536713	16.9205	0.658496	0.057	0.0033	0.557878	0.057	0.0033	450	110	120	369.8	8.6	14	391	19	20	5.42199	369.8	14	0.474	0.029	0.0591	0.0023	0.536713	Zircon	1140	150	35.7	5.6	476000	15000	61.2	2.5	0.97	0.18	52.8	5.3	37.3	6.2	21.6	3.5	420
T #374	Output_1_256	26.539	0.463	0.029	0.0598	0.0023	0.523277	16.7224	0.643169	0.0552	0.0038	0.487742	0.0552	0.0038	340	130	140	374.3	8.6	14	383	19	19	2.27154	374.3	14	0.463	0.029	0.0598	0.0023	0.523277	Zircon	435	49	12.5	2.4	481000	12000	59.4	1.8	0.86	0.18	31.1	2	10.1	2	8	1.6	196
T #388	Output_1_266	26.19	0.472	0.034	0.0588	0.0021	0.4442	17.0068	0.607386	0.0571	0.0045	0.412768	0.0571	0.0045	380	160	160	368.2	7.1	13	396	25	25	7.0202	368.2	13	0.472	0.034	0.0588	0.0021	0.4442	Zircon	268	34	11.4	1.6	486000	12000	56.8	1.8	0.107	0.04	12.48	0.7	7.13	0.84	3.98	0.38	198.7
Xenocrysts
T #315	Output_1_213	26.185	0.578	0.049	0.0692	0.0027	0.41809	14.4509	0.563834	0.06	0.0051	0.417176	0.06	0.0051	470	170	180	431	10	16	454	31	32	5.06608	431	16	0.578	0.049	0.0692	0.0027	0.41809	Zircon	258	31	3.6	1.1	494000	16000	57.6	2.1	0.111	0.063	11.47	0.71	1.57	0.35	0.82	0.16	102.9
T #318	Output_1_216	26.188	0.544	0.038	0.0696	0.0025	0.457299	14.3678	0.516085	0.0564	0.004	0.451822	0.0564	0.004	380	140	150	433.5	8.5	15	435	24	25	0.344828	433.5	15	0.544	0.038	0.0696	0.0025	0.457299	Zircon	227	28	3.63	0.88	470000	14000	56.8	2.1	0.0002	0.0053	16.24	0.79	2.06	0.43	1.01	0.15	126.6
T #319	Output_1_217	26.188	0.579	0.041	0.0671	0.0027	0.494051	14.9031	0.599679	0.0617	0.0044	0.49142	0.0617	0.0044	580	150	150	418	11	17	458	26	26	8.73362	418	17	0.579	0.041	0.0671	0.0027	0.494051	Zircon	334	37	7.8	1.2	473000	14000	56	2.3	0.092	0.043	19.1	1.1	3.95	0.72	2.39	0.41	111.8
T #320	Output_1_218	26.185	0.547	0.04	0.0647	0.0025	0.467189	15.4559	0.597216	0.0609	0.0045	0.463393	0.0609	0.0045	550	150	160	404.1	9.2	15	438	25	26	7.73973	404.1	15	0.547	0.04	0.0647	0.0025	0.467189	Zircon	285	31	6.2	1.1	468000	15000	57.3	2.3	0.0039	0.0091	13.68	0.72	1.54	0.35	0.79	0.14	90.8
T #321	Output_1_219	26.541	0.545	0.03	0.0692	0.0026	0.563756	14.4509	0.542952	0.0571	0.0036	0.511928	0.0571	0.0036	420	130	140	431.3	8.9	16	438	20	20	1.52968	431.3	16	0.545	0.03	0.0692	0.0026	0.563756	Zircon	268	34	4	0.88	483000	14000	57.3	2.3	0.41	0.18	19	1	2.63	0.53	1.16	0.21	137
T #322	Output_1_220	26.188	0.564	0.036	0.0688	0.0026	0.50946	14.5349	0.549283	0.0593	0.0038	0.507979	0.0593	0.0038	500	130	140	428.8	8.8	15	449	23	24	4.49889	428.8	15	0.564	0.036	0.0688	0.0026	0.50946	Zircon	307	34	4.6	1.1	474000	14000	58.5	2.3	-0.002466	9.4e-05	16.39	0.81	1.19	0.27	0.53	0.13	89.4
T #324	Output_1_222	26.541	0.559	0.046	0.0689	0.0026	0.416834	14.5138	0.54769	0.0592	0.0051	0.401228	0.0592	0.0051	440	180	180	429.5	8.8	15	443	30	30	3.0474	429.5	15	0.559	0.046	0.0689	0.0026	0.416834	Zircon	281	28	5.1	1.2	483000	10000	59.5	2	-0.002512	7.8e-05	16.27	0.71	1.44	0.31	0.68	0.14	100.2
T #329	Output_1_223	26.539	0.55	0.043	0.0687	0.0026	0.435708	14.556	0.550884	0.0591	0.0047	0.429712	0.0591	0.0047	460	170	170	428	9.3	16	438	28	28	2.28311	428	16	0.55	0.043	0.0687	0.0026	0.435708	Zircon	247	34	3.93	0.92	485000	16000	58.2	2.1	0.0009	0.0068	14.93	0.76	0.87	0.24	0.51	0.11	75
T #333	Output_1_227	26.539	0.463	0.041	0.0629	0.0026	0.422976	15.8983	0.657161	0.0544	0.0049	0.417086	0.0544	0.0049	270	180	180	393	11	16	379	28	28	3.69393	393	16	0.463	0.041	0.0629	0.0026	0.422976	Zircon	269	35	4.7	1	460000	14000	53.6	2.1	0.052	0.029	11.02	0.62	2.04	0.44	1.45	0.22	101.2
T #334	Output_1_228	26.541	0.496	0.037	0.0646	0.0024	0.445805	15.4799	0.575104	0.057	0.0045	0.425797	0.057	0.0045	380	160	160	403.2	8.6	15	404	25	25	0.19802	403.2	15	0.496	0.037	0.0646	0.0024	0.445805	Zircon	456	45	3.27	0.93	462000	13000	54.5	1.9	1.26	0.28	20.3	1.1	4.72	0.75	1.45	0.18	153.3
T #335	Output_1_229	26.541	0.535	0.042	0.0652	0.0024	0.424536	15.3374	0.564568	0.061	0.0052	0.396428	0.061	0.0052	510	170	180	407	8.2	15	428	27	28	4.90654	407	15	0.535	0.042	0.0652	0.0024	0.424536	Zircon	433	82	19.7	5.7	509000	13000	62.1	2.1	2.49	0.83	21.8	1.9	4.7	1.1	1.16	0.21	96.6
T #336	Output_1_230	26.188	0.521	0.036	0.062	0.0023	0.473014	16.129	0.598335	0.062	0.0044	0.463254	0.062	0.0044	630	140	150	387.6	7.6	14	425	25	25	8.8	387.6	14	0.521	0.036	0.062	0.0023	0.473014	Zircon	306	34	16.6	4.2	482000	13000	57.2	2.2	0.182	0.054	22.44	0.82	3.89	0.62	2.34	0.26	169
T #337	Output_1_231	26.186	0.624	0.073	0.0678	0.0032	0.374141	14.7493	0.69613	0.0676	0.0082	0.362611	0.0676	0.0082	620	240	240	422	14	19	475	44	44	11.1579	422	19	0.624	0.073	0.0678	0.0032	0.374141	Zircon	188	35	7.7	1.5	466000	15000	54.9	1.9	0.01	0.015	9.18	0.59	1.05	0.31	0.42	0.13	63.8
T #338	Output_1_232	26.539	0.527	0.045	0.0691	0.0028	0.428722	14.4718	0.586411	0.0569	0.005	0.418751	0.0569	0.005	370	180	180	431	11	17	422	30	30	2.1327	431	17	0.527	0.045	0.0691	0.0028	0.428722	Zircon	247	32	6.9	1.2	474000	14000	56.3	2	0.019	0.02	11.6	0.91	1.41	0.34	0.94	0.16	87
T #343	Output_1_233	26.186	0.519	0.035	0.0679	0.0024	0.464231	14.7275	0.520561	0.0562	0.004	0.444785	0.0562	0.004	390	150	150	423.7	7.8	15	420	23	24	0.880952	423.7	15	0.519	0.035	0.0679	0.0024	0.464231	Zircon	379	41	8.6	1.5	480000	14000	62.9	2.1	0.037	0.029	27.1	1.4	2.41	0.51	1.49	0.32	167.6
T #344	Output_1_234	26.539	0.538	0.033	0.0682	0.0025	0.512992	14.6628	0.537491	0.0587	0.0039	0.483083	0.0587	0.0039	470	140	140	425.1	8	15	433	21	22	1.82448	425.1	15	0.538	0.033	0.0682	0.0025	0.512992	Zircon	329	32	5.5	1.2	476000	14000	60.7	2.1	-0.002552	7.5e-05	22.9	1.1	1.74	0.38	1.08	0.18	140.4
T #345	Output_1_235	26.188	0.555	0.048	0.0698	0.003	0.445031	14.3267	0.615758	0.0596	0.0054	0.428593	0.0596	0.0054	450	180	190	435	13	18	439	31	32	0.911162	435	18	0.555	0.048	0.0698	0.003	0.445031	Zircon	271	36	20	17	457000	14000	52.1	1.9	1.02	0.71	12.5	1.4	1.68	0.54	0.67	0.17	89
T #346	Output_1_236	26.19	0.562	0.037	0.0706	0.0025	0.47369	14.1643	0.501569	0.0596	0.0044	0.432478	0.0596	0.0044	480	150	150	439.7	7.2	15	448	24	24	1.85268	439.7	15	0.562	0.037	0.0706	0.0025	0.47369	Zircon	293	32	7.5	1.2	480000	13000	56.8	1.8	0.243	0.099	15.87	0.79	1.66	0.41	0.85	0.16	86.7
T #350	Output_1_240	26.188	0.521	0.047	0.0714	0.0027	0.386593	14.0056	0.529624	0.0539	0.0048	0.390854	0.0539	0.0048	260	180	180	444.8	9.4	16	417	31	31	6.66667	444.8	16	0.521	0.047	0.0714	0.0027	0.386593	Zircon	237	29	4.1	1	465000	13000	55.5	1.8	-0.002415	6.8e-05	13.87	0.64	0.85	0.26	0.5	0.12	82.9
T #358	Output_1_244	26.537	0.538	0.045	0.0684	0.0026	0.413732	14.6199	0.555727	0.058	0.0051	0.396801	0.058	0.0051	400	180	180	426.4	9.8	16	429	30	30	0.606061	426.4	16	0.538	0.045	0.0684	0.0026	0.413732	Zircon	209	33	4.3	1.1	493000	15000	57.3	2.1	-0.002516	8e-05	13.88	0.66	0.78	0.24	0.49	0.13	75.9
T #359	Output_1_245	26.188	0.548	0.045	0.0631	0.0026	0.448485	15.8479	0.653002	0.0644	0.0057	0.422045	0.0644	0.0057	600	190	200	394	11	16	435	30	30	9.42529	394	16	0.548	0.045	0.0631	0.0026	0.448485	Zircon	311	35	9.1	1.7	483000	14000	56.4	1.9	0.14	0.06	14.86	0.98	3.99	0.72	3.14	0.53	159
T #360	Output_1_246	26.188	0.606	0.064	0.0712	0.0032	0.391578	14.0449	0.631233	0.0624	0.0064	0.401359	0.0624	0.0064	530	220	220	443	14	19	467	40	40	5.13919	443	19	0.606	0.064	0.0712	0.0032	0.391578	Zircon	250	37	12.5	1.9	486000	17000	55.6	2.2	0.191	0.061	11.46	0.76	3.71	0.64	2.34	0.27	140.1
T #361	Output_1_247	26.188	0.564	0.04	0.0659	0.0024	0.456799	15.1745	0.552638	0.0633	0.0048	0.432931	0.0633	0.0048	630	150	150	411.2	8.1	15	453	27	28	9.22737	411.2	15	0.564	0.04	0.0659	0.0024	0.456799	Zircon	215	34	14.3	3	483000	14000	56.3	2	0.117	0.049	17	0.78	1.96	0.44	1.11	0.16	103.9
T #362	Output_1_248	26.188	0.525	0.058	0.0622	0.0042	0.521511	16.0772	1.0856	0.0637	0.0067	0.540237	0.0637	0.0067	580	210	220	388	23	26	415	38	38	6.50602	388	26	0.525	0.058	0.0622	0.0042	0.521511	Zircon	430	140	13.4	4.1	488000	14000	57.2	2.1	0.45	0.22	12.9	3.6	7.8	3.6	5.8	2.7	152
T #363	Output_1_249	26.189	0.521	0.046	0.067	0.0026	0.40237	14.9254	0.579194	0.0566	0.0049	0.409035	0.0566	0.0049	350	170	170	417.9	9.9	16	418	29	30	0.0239234	417.9	16	0.521	0.046	0.067	0.0026	0.40237	Inclusion
T #365	Output_1_251	26.185	0.513	0.035	0.0637	0.0026	0.513392	15.6986	0.640759	0.0586	0.0042	0.494865	0.0586	0.0042	450	140	150	398	10	16	415	23	23	4.09639	398	16	0.513	0.035	0.0637	0.0026	0.513392	Inclusion
T #366	Output_1_252	25.836	0.531	0.038	0.0628	0.0024	0.471064	15.9236	0.608544	0.0607	0.0046	0.450277	0.0607	0.0046	560	160	170	392.4	8.7	14	427	25	25	8.10304	392.4	14	0.531	0.038	0.0628	0.0024	0.471064	Zircon	281	35	29.3	8	534000	12000	64.5	1.8	0.45	0.13	21.68	0.84	3.35	0.69	2.01	0.26	141.1
T #373	Output_1_255	26.186	0.551	0.039	0.0692	0.0025	0.454617	14.4509	0.522069	0.057	0.0043	0.431921	0.057	0.0043	400	150	150	431.3	8.6	15	444	26	26	2.86036	431.3	15	0.551	0.039	0.0692	0.0025	0.454617	Zircon	274	43	4.9	1.3	482000	17000	58.5	2.4	-0.00296	0.00011	18.59	0.88	1.17	0.38	0.65	0.13	100.7
T #375	Output_1_257	26.893	0.568	0.044	0.0681	0.0026	0.442081	14.6843	0.560634	0.0591	0.0047	0.432791	0.0591	0.0047	480	150	160	424.4	9.6	16	454	27	27	6.51982	424.4	16	0.568	0.044	0.0681	0.0026	0.442081	Zircon	257	38	4.1	1.1	473000	14000	55.3	1.8	0.44	0.2	14.5	1	2.18	0.65	0.78	0.17	67.2
T #376	Output_1_258	26.188	0.55	0.045	0.0672	0.0025	0.413916	14.881	0.553607	0.0574	0.0047	0.413651	0.0574	0.0047	400	170	180	419.4	8.8	15	437	30	30	4.02746	419.4	15	0.55	0.045	0.0672	0.0025	0.413916	Zircon	168	31	8.1	1.9	522000	14000	60.6	2	0.039	0.033	13.39	0.63	0.72	0.28	0.6	0.14	68.2
T #377	Output_1_259	26.188	0.535	0.042	0.0648	0.0025	0.441056	15.4321	0.595374	0.0577	0.0048	0.420724	0.0577	0.0048	420	160	170	404.4	9.1	15	429	27	27	5.73427	404.4	15	0.535	0.042	0.0648	0.0025	0.441056	Zircon	300	46	5.7	1.2	482000	15000	56.6	2.4	0.71	0.3	19	1.3	3.32	0.64	1.76	0.23	83.6
T #378	Output_1_260	26.186	0.584	0.04	0.0709	0.0027	0.485936	14.1044	0.53712	0.0576	0.0041	0.471734	0.0576	0.0041	430	140	150	441.3	9.6	16	461	25	26	4.27332	441.3	16	0.584	0.04	0.0709	0.0027	0.485936	Zircon	268	35	7.4	1.6	473000	17000	58	2.4	-0.00254	0.0001	18.8	0.86	1.91	0.41	0.86	0.16	112.8
T #379	Output_1_261	26.539	0.502	0.028	0.0617	0.0025	0.587732	16.2075	0.656704	0.0575	0.0034	0.565263	0.0575	0.0034	440	110	120	386	10	15	413	19	19	6.53753	386	15	0.502	0.028	0.0617	0.0025	0.587732	Zircon	426	35	8.8	1.4	480000	15000	60.1	2.1	0.49	0.12	32	2	10	1.4	5.21	0.64	244
T #380	Output_1_262	26.19	0.572	0.053	0.0709	0.0026	0.368001	14.1044	0.517227	0.0565	0.0054	0.358227	0.0565	0.0054	330	190	200	441.7	9	16	449	34	34	1.62584	441.7	16	0.572	0.053	0.0709	0.0026	0.368001	Zircon	193	30	5.03	0.99	472000	14000	55.9	2.2	0.007	0.011	10.38	0.65	0.61	0.2	0.4	0.1	60.2
T #386	Output_1_264	26.186	0.507	0.031	0.0617	0.0028	0.595982	16.2075	0.735509	0.058	0.0036	0.59021	0.058	0.0036	460	120	130	386	12	17	417	22	22	7.43405	386	17	0.507	0.031	0.0617	0.0028	0.595982	Zircon	355	40	12.2	3.4	503000	14000	58.9	2.1	0.05	0.033	22.2	1.3	6.38	0.86	3.22	0.37	219
T #387	Output_1_265	26.539	0.507	0.035	0.0608	0.0023	0.480558	16.4474	0.622187	0.058	0.0041	0.471829	0.058	0.0041	440	140	150	380.4	7.8	14	412	23	23	7.6699	380.4	14	0.507	0.035	0.0608	0.0023	0.480558	Zircon	634	46	17.3	2.3	477000	13000	55.7	1.8	0.568	0.098	23.8	0.99	11.4	1.1	6.98	0.48	244.5
T #389	Output_1_267	26.541	0.526	0.034	0.0646	0.0024	0.498314	15.4799	0.575104	0.0566	0.0038	0.484177	0.0566	0.0038	390	130	140	403.4	8	14	424	22	23	4.85849	403.4	14	0.526	0.034	0.0646	0.0024	0.498314	Zircon	563	49	6.5	1.4	470000	14000	56.4	2.4	2.14	0.55	27.2	1.8	8.2	1.2	3.41	0.45	130.6
T #394	Output_1_272	26.539	0.58	0.051	0.0684	0.0025	0.383826	14.6199	0.534353	0.0591	0.0054	0.371404	0.0591	0.0054	430	180	180	426.4	8.5	15	455	32	32	6.28571	426.4	15	0.58	0.051	0.0684	0.0025	0.383826	Zircon	199	31	9.5	1.9	482000	16000	55.9	2.2	0.049	0.027	13.54	0.79	0.81	0.26	0.58	0.11	65.6
Pb loss
T #330	Output_1_224	26.188	0.351	0.039	0.0405	0.0034	0.602833	24.6914	2.07286	0.0623	0.0042	0.779711	0.0623	0.0042	610	140	150	255	20	21	298	28	28	14.4295	255	21	0.351	0.039	0.0405	0.0034	0.602833	Inclusion
T #390	Output_1_268	26.537	0.419	0.034	0.051	0.0028	0.560375	19.6078	1.07651	0.0576	0.0042	0.601503	0.0576	0.0042	470	140	150	320	14	17	350	24	24	8.57143	320	17	0.419	0.034	0.051	0.0028	0.560375	Zircon	568	53	35.9	4.6	481000	14000	56.8	2	6.2	4.3	41.1	6.4	30.1	4.2	18.2	3	219
T #392	Output_1_270	26.188	0.342	0.035	0.0412	0.0031	0.592356	24.2718	1.82628	0.0582	0.0047	0.681691	0.0582	0.0047	430	160	170	260	18	19	293	25	26	11.2628	260	19	0.342	0.035	0.0412	0.0031	0.592356	Zircon	639	78	42.7	7.7	463000	14000	57.2	2.1	1.58	0.29	42.7	5.4	26.9	4.3	19	3.6	289
Discordant
T #316	Output_1_214	26.19	0.426	0.034	0.0482	0.0024	0.52931	20.7469	1.03304	0.0665	0.0057	0.502309	0.0665	0.0057	740	160	170	304	12	15	368	28	29	17.3913								Zircon	887	96	13.4	1.9	479000	14000	57.4	2.3	0.51	0.14	32	3.3	19.5	2.9	14.9	1.9	276
T #317	Output_1_215	26.189	0.484	0.041	0.0545	0.0026	0.490704	18.3486	0.875347	0.0639	0.005	0.520565	0.0639	0.005	610	160	160	342	13	16	394	27	27	13.198								Zircon	597	47	13.7	2	486000	13000	59.2	2.2	0.65	0.14	25.2	1.5	13.4	1.6	9.31	0.87	192
T #323	Output_1_221	26.188	0.538	0.036	0.0602	0.0024	0.511835	16.6113	0.662244	0.0655	0.0044	0.510365	0.0655	0.0044	690	140	150	376.8	9.4	15	432	23	24	12.7778								Zircon	540	50	11.4	1.9	459000	15000	57.1	2.3	0.51	0.11	24.5	1.3	9	1.3	7.19	0.75	170.7
T #332	Output_1_226	26.188	0.685	0.057	0.0685	0.0027	0.428086	14.5985	0.575417	0.0741	0.0066	0.40468	0.0741	0.0066	910	180	180	427	10	16	519	35	35	17.7264								Zircon	293	40	24.3	5.8	495000	13000	57	1.7	0.118	0.057	7.75	0.43	1.3	0.36	0.8	0.15	82.7
T #349	Output_1_239	26.188	0.537	0.035	0.0631	0.0024	0.504019	15.8479	0.602771	0.0637	0.0047	0.458197	0.0637	0.0047	630	140	150	394.5	8.7	15	432	22	22	8.68056								Zircon	430	43	9.2	2	448000	13000	55.2	1.9	0.55	0.11	32.1	1.6	12.5	1.6	8.64	0.89	250
T #351	Output_1_241	26.188	0.429	0.03	0.0506	0.0027	0.606616	19.7629	1.05454	0.0628	0.0035	0.691563	0.0628	0.0035	660	110	120	318	14	17	359	21	21	11.4206								Zircon	544	42	18.3	2.8	486000	15000	60.5	2.1	1.11	0.23	38.6	2.9	18.5	3	15.1	2.6	250
T #352	Output_1_242	26.188	0.425	0.028	0.0372	0.0025	0.714095	26.8817	1.80657	0.0876	0.006	0.700359	0.0876	0.006	1270	130	140	235	14	15	356	19	19	33.9888								Zircon	1600	150	36.8	5.8	495000	11000	66.3	2.4	5.36	0.84	82	10	68	10	33.6	5.1	630
T #364	Output_1_250	26.188	0.541	0.038	0.0622	0.0023	0.465834	16.0772	0.594493	0.0634	0.0048	0.438864	0.0634	0.0048	620	160	170	388.7	8.2	14	438	26	27	11.2557								Zircon	321	36	56	17	461000	13000	54.9	1.8	1.19	0.29	17.7	1	3.3	0.57	1.75	0.24	100
T #372	Output_1_254	26.188	0.583	0.044	0.067	0.0027	0.471015	14.9254	0.60147	0.063	0.0054	0.425472	0.063	0.0054	570	170	180	418	10	16	464	29	30	9.91379								Inclusion
T #385	Output_1_263	26.188	0.406	0.045	0.0443	0.0041	0.640945	22.5734	2.08918	0.064	0.0052	0.751497	0.064	0.0052	630	180	180	279	24	25	337	32	32	17.2107								Zircon	920	140	22	4.7	481000	16000	57	2.3	2.12	0.44	30.5	5.1	24	5.7	13.6	3.4	315
T #391	Output_1_269	26.185	0.511	0.034	0.0559	0.0022	0.509105	17.8891	0.704043	0.063	0.0042	0.508366	0.063	0.0042	620	130	140	350.3	8.8	14	414	22	23	15.3865								Inclusion
T #393	Output_1_271	36.859																														Inclusion
PIN-01
Autocrysts
T #400	Output_1_274	26.188	0.776	0.065	0.0951	0.0037	0.421258	10.5152	0.409111	0.0572	0.0048	0.420625	0.0572	0.0048	390	170	180	585	14	22	570	38	38	2.63158	585	22	0.776	0.065	0.0951	0.0037	0.421258	Zircon	172	31	5.2	1.3	498000	13000	55.7	1.8	-0.002657	8.4e-05	12.73	0.66	1.36	0.4	1.59	0.24	37.9
T #401	Output_1_275	26.189	0.835	0.044	0.1016	0.0035	0.54719	9.84252	0.339063	0.0586	0.0033	0.521833	0.0586	0.0033	490	120	120	623.8	9.4	20	615	25	26	1.43089	623.8	20	0.835	0.044	0.1016	0.0035	0.54719	Zircon	181	32	5.2	1.2	494000	13000	55.1	1.9	0.0032	0.008	3.14	0.25	0.6	0.22	0.1	0.051	36.5
T #404	Output_1_278	26.188	0.69	0.041	0.0847	0.0033	0.548327	11.8064	0.459989	0.0584	0.0038	0.513719	0.0584	0.0038	470	130	130	524	12	19	531	25	25	1.31827	524	19	0.69	0.041	0.0847	0.0033	0.548327	Zircon	136	32	5.7	1.8	495000	16000	65.3	2.2	0.0001	0.0056	20.6	1	2.11	0.45	0.3	0.13	116.2
T #405	Output_1_279	26.189	0.712	0.069	0.0787	0.0032	0.386897	12.7065	0.516655	0.0634	0.0061	0.389271	0.0634	0.0061	550	190	200	488	12	19	532	40	40	8.27068	488	19	0.712	0.069	0.0787	0.0032	0.386897	Zircon	267	39	15.5	2	479000	14000	54.1	2.2	0.91	0.32	17.3	1.1	6.39	0.99	2.24	0.28	137.8
T #413	Output_1_283	26.188	0.735	0.041	0.0918	0.0032	0.529938	10.8933	0.379721	0.0576	0.0034	0.508495	0.0576	0.0034	470	120	130	566.3	8.7	19	554	24	24	2.22022	566.3	19	0.735	0.041	0.0918	0.0032	0.529938	Zircon	285	40	22.9	2.3	506000	14000	55.7	1.8	-0.00288	0.00015	1.7	0.19	2.26	0.48	0.176	0.085	40.5
T #420	Output_1_290	26.19	0.87	0.12	0.0982	0.0043	0.302583	10.1833	0.445908	0.0666	0.0099	0.28257	0.0666	0.0099	500	290	290	603	18	25	609	69	69	0.985222	603	25	0.87	0.12	0.0982	0.0043	0.302583	Zircon	191	36	12.8	1.8	480000	14000	56.6	2.1	0.71	0.25	72.4	3.1	7.7	1	2.81	0.31	63.4
T #422	Output_1_292	26.188	0.843	0.069	0.1039	0.0038	0.40796	9.62464	0.352008	0.059	0.0048	0.410024	0.059	0.0048	450	160	170	637	13	22	608	37	38	4.76974	637	22	0.843	0.069	0.1039	0.0038	0.40796	Zircon	231	42	10.3	1.6	490000	14000	55.7	2.1	-0.002567	9.1e-05	27.6	1.3	1.66	0.39	0.94	0.17	64.5
T #431	Output_1_297	25.836	0.667	0.071	0.0826	0.0034	0.360667	12.1065	0.498332	0.0591	0.0061	0.370431	0.0591	0.0061	400	200	210	511	13	20	503	42	42	1.59046	511	20	0.667	0.071	0.0826	0.0034	0.360667	Zircon	77	31	0.28	0.54	505000	17000	57.2	2.3	-0.002635	9.4e-05	0.351	0.075	-0.00653	0.00023	0.038	0.037	7.08
T #432	Output_1_298	26.19	0.711	0.06	0.0907	0.0036	0.425614	11.0254	0.437611	0.0574	0.0051	0.407874	0.0574	0.0051	410	180	190	559	14	21	539	37	37	3.71058	559	21	0.711	0.06	0.0907	0.0036	0.425614	Zircon	204	33	12.2	1.6	507000	17000	57.4	2	0.015	0.018	47.1	1.8	5.44	0.75	1.4	0.18	85.1
T #444	Output_1_306	26.184	0.742	0.057	0.0843	0.0031	0.431778	11.8624	0.436221	0.0645	0.0055	0.395998	0.0645	0.0055	610	170	170	522	10	18	554	33	33	5.77617	522	18	0.742	0.057	0.0843	0.0031	0.431778	Zircon	355	48	12.7	2.4	500000	13000	57.3	2	0.67	0.18	7.17	0.46	3.82	0.73	1.02	0.22	110.1
T #447	Output_1_309	25.836	0.689	0.093	0.0846	0.0038	0.31575	11.8203	0.530937	0.0598	0.0086	0.298129	0.0598	0.0086	320	270	270	523	17	23	504	56	56	3.76984	523	23	0.689	0.093	0.0846	0.0038	0.31575	Zircon	245	46	12.7	2.2	491000	15000	54.8	2	0.0017	0.0093	14.84	0.8	3.03	0.6	1	0.2	99
T #450	Output_1_312	26.191	0.66	0.1	0.0799	0.0039	0.306634	12.5156	0.610901	0.0608	0.0098	0.28983	0.0608	0.0098	320	310	310	495	18	23	490	65	65	1.02041	495	23	0.66	0.1	0.0799	0.0039	0.306634	Zircon	179	33	14.5	1.9	516000	15000	59.1	2.3	0.015	0.016	13.54	0.72	1	0.31	0.64	0.13	47.7
T #459	Output_1_317	26.188	0.87	0.1	0.0905	0.0043	0.382018	11.0497	0.525015	0.0703	0.0086	0.362049	0.0703	0.0086	690	250	260	558	20	26	615	56	57	9.26829	558	26	0.87	0.1	0.0905	0.0043	0.382018	Zircon	150	36	9.6	1.6	495000	15000	56.1	2	0.043	0.023	31.5	1.3	1.42	0.37	0.55	0.13	37.4
T #461	Output_1_319	26.188	0.877	0.076	0.0996	0.0039	0.411764	10.0402	0.393139	0.0638	0.0057	0.401418	0.0638	0.0057	580	180	180	612	15	23	625	40	40	2.08	612	23	0.877	0.076	0.0996	0.0039	0.411764	Zircon	182	39	15.6	2	501000	15000	56.5	1.8	0.007	0.011	14.55	0.8	1.17	0.32	0.372	0.097	51.5
T #463	Output_1_321	26.543	0.718	0.071	0.0895	0.0036	0.376788	11.1732	0.449424	0.0588	0.0061	0.361506	0.0588	0.0061	420	210	220	552	14	21	540	44	44	2.22222	552	21	0.718	0.071	0.0895	0.0036	0.376788	Zircon	74	28	5.7	1.2	506000	16000	55.7	2.1	0.056	0.032	18.91	0.89	2.63	0.48	0.63	0.14	29
T #469	Output_1_323	26.191	0.824	0.036	0.0974	0.0033	0.612817	10.2669	0.347853	0.0615	0.0028	0.597002	0.0615	0.0028	614	90	100	599	9	20	607	19	20	1.31796	599	20	0.824	0.036	0.0974	0.0033	0.612817	Zircon	316	60	4.3	1.1	518000	15000	60.2	2.1	4.2	1.3	29.1	3.2	8.2	2.3	0.191	0.076	75
T #470	Output_1_324	26.188	0.667	0.064	0.0861	0.0033	0.370946	11.6144	0.445151	0.0568	0.0055	0.368037	0.0568	0.0055	370	180	180	532	12	20	513	35	35	3.7037	532	20	0.667	0.064	0.0861	0.0033	0.370946	Zircon	201	48	10.2	1.8	510000	16000	61	2.2	0.011	0.017	56.6	2.2	1.68	0.41	1.01	0.18	79.1
T #473	Output_1_327	26.191	0.745	0.097	0.0934	0.0043	0.333368	10.7066	0.492918	0.0584	0.0075	0.337458	0.0584	0.0075	320	260	260	578	20	27	535	58	58	8.03738	578	27	0.745	0.097	0.0934	0.0043	0.333368	Zircon	139	58	8	1.5	502000	15000	58.1	2.2	4.5	2.6	18	5.1	4.9	2.4	0.53	0.12	12.08
T #478	Output_1_332	26.184	0.757	0.074	0.0928	0.0039	0.39496	10.7759	0.452865	0.0611	0.0061	0.387975	0.0611	0.0061	460	200	200	572	16	23	563	43	43	1.59858	572	23	0.757	0.074	0.0928	0.0039	0.39496	Zircon	148	37	6	1.2	505000	17000	56.7	2	0.057	0.032	47	1.5	1.48	0.3	1.3	0.21	28.5
Xenocrysts
T #399	Output_1_273	26.186	2.03	0.22	0.1921	0.0082	0.366474	5.20562	0.222208	0.0745	0.0085	0.35041	0.0745	0.0085	800	220	230	1131	31	45	1078	72	72	4.91651	800	230	2.03	0.22	0.1921	0.0082	0.366474	Zircon	206	32	19.3	2.1	496000	15000	55.1	2	0.014	0.014	25.1	1.1	0.98	0.32	0.55	0.11	48.2
T #402	Output_1_276	26.189	4.88	0.22	0.3261	0.011	0.599096	3.06654	0.103441	0.1064	0.0052	0.568041	0.1064	0.0052	1714	76	84	1819	27	55	1801	36	37	0.999445	1714	84	4.88	0.22	0.3261	0.011	0.599096	Zircon	332	37	6.9	1.3	484000	15000	54.9	2.1	-0.002463	8.9e-05	8.1	0.67	1	0.27	0.095	0.051	75.3
T #403	Output_1_277	26.188	1.79	0.14	0.188	0.0078	0.468619	5.31915	0.220688	0.0674	0.0053	0.466649	0.0674	0.0053	720	170	180	1110	28	42	1018	53	54	9.03733	720	180	1.79	0.14	0.188	0.0078	0.468619	Zircon	206	30	10.8	1.5	495000	14000	55.9	1.9	-0.002464	7.7e-05	10.51	0.55	1.4	0.35	0.59	0.14	48.2
T #406	Output_1_280	26.188	1.97	0.12	0.1868	0.007	0.523974	5.35332	0.200606	0.076	0.0051	0.487556	0.076	0.0051	1020	120	130	1103	23	38	1097	42	43	0.546946	1020	130	1.97	0.12	0.1868	0.007	0.523974	Zircon	384	43	10	1.7	491000	16000	56.7	2.1	0.99	0.65	13.1	2.4	4.6	1.8	0.94	0.14	159.8
T #407	Output_1_281	26.188	2.35	0.2	0.2068	0.0081	0.418076	4.83559	0.189402	0.0815	0.007	0.414923	0.0815	0.007	1090	170	180	1211	27	43	1197	59	59	1.16959	1090	180	2.35	0.2	0.2068	0.0081	0.418076	Zircon	192	35	13	1.6	501000	16000	57.3	2.1	0.011	0.014	22.9	1.2	0.76	0.27	0.31	0.11	55.8
T #408	Output_1_282	26.189	4.04	0.16	0.2905	0.01	0.656018	3.44234	0.118497	0.0993	0.0044	0.613496	0.0993	0.0044	1591	75	85	1643	26	51	1639	30	32	0.244051	1591	85	4.04	0.16	0.2905	0.01	0.656018	Zircon	238	36	6	1.3	487000	12000	56.4	1.9	0.056	0.035	43.4	1.5	2.84	0.58	1.25	0.19	84.9
T #416	Output_1_286	26.188	14.63	0.51	0.517	0.019	0.725523	1.93424	0.0710841	0.206	0.0076	0.705735	0.206	0.0076	2867	47	57	2682	43	79	2788	32	34	3.80201	2867	57	14.63	0.51	0.517	0.019	0.725523	Zircon	349	51	14.7	2.2	506000	16000	59.5	2.1	0.015	0.017	50.3	2.1	3.47	0.57	1.07	0.18	103.6
T #417	Output_1_287	26.189	1.846	0.089	0.1889	0.0067	0.592588	5.29381	0.187763	0.0707	0.0035	0.58241	0.0707	0.0035	916	89	98	1115	19	36	1053	31	32	5.88794	916	98	1.846	0.089	0.1889	0.0067	0.592588	Zircon	148	38	4.6	1.2	497000	15000	54.8	2	-0.002531	9.4e-05	9.2	0.85	0.43	0.19	0.229	0.085	33.5
T #421	Output_1_291	26.186	1.966	0.08	0.184	0.0068	0.672314	5.43478	0.200851	0.0785	0.0035	0.63816	0.0785	0.0035	1133	80	90	1088	21	37	1102	28	29	1.27042	1133	90	1.966	0.08	0.184	0.0068	0.672314	Zircon	980	110	14.9	3.2	533000	14000	60.6	2.3	4.8	1.3	26	3.7	12.3	2.1	1.88	0.32	109.2
T #430	Output_1_296	26.188	0.918	0.048	0.1098	0.0044	0.608295	9.10747	0.364962	0.0614	0.0029	0.646957	0.0614	0.0029	607	95	110	671	17	26	660	26	27	1.66667	671	26	0.918	0.048	0.1098	0.0044	0.608295	Zircon	649	77	17	2.5	502000	15000	57.9	2.1	0.43	0.13	20.1	3.7	15	3.8	5.5	1.3	132
T #433	Output_1_299	26.189	28.95	0.77	0.719	0.027	0.816044	1.39082	0.0522283	0.2944	0.0089	0.77895	0.2944	0.0089	3439	35	49	3486	59	100	3451	24	27	1.0142	3439	49	28.95	0.77	0.719	0.027	0.816044	Zircon	187	34	5.9	1.3	485000	14000	55.9	2	0.004	0.0089	18.5	1	1.56	0.35	1.12	0.18	61.1
T #434	Output_1_300	26.188	3.45	0.12	0.2572	0.0093	0.720687	3.88802	0.140586	0.0986	0.0037	0.693872	0.0986	0.0037	1577	58	70	1474	26	48	1514	24	25	2.64201	1577	70	3.45	0.12	0.2572	0.0093	0.720687	Zircon	405	54	14.7	6.1	494000	14000	63.6	2.3	0.044	0.026	56.4	6.6	3.46	0.66	1.12	0.22	186
T #435	Output_1_301	26.188	3.64	0.19	0.2812	0.011	0.599703	3.55619	0.139111	0.0946	0.0053	0.572483	0.0946	0.0053	1470	100	110	1596	33	54	1549	41	42	3.03422	1470	110	3.64	0.19	0.2812	0.011	0.599703	Zircon	227	35	10.3	1.6	506000	13000	59.8	1.8	0.0041	0.0092	28.6	1.5	0.8	0.26	0.52	0.11	64.3
T #436	Output_1_302	26.186	1.442	0.083	0.1589	0.0061	0.554863	6.29327	0.241592	0.0657	0.0037	0.563249	0.0657	0.0037	730	120	130	950	21	34	896	35	36	6.02679	950	34	1.442	0.083	0.1589	0.0061	0.554863	Zircon	565	45	8.8	1.5	483000	15000	61.4	2.3	0.017	0.017	33.5	1.3	2.87	0.49	1.04	0.16	299.7
T #441	Output_1_303	26.539	1.199	0.073	0.1262	0.0051	0.553019	7.92393	0.320222	0.0695	0.0048	0.505029	0.0695	0.0048	830	140	150	769	21	31	790	33	34	2.65823	769	31	1.199	0.073	0.1262	0.0051	0.553019	Zircon	1095	85	17.6	2.9	509000	15000	57	2.4	0.71	0.23	4.07	0.46	4.16	0.85	0.62	0.18	236
T #442	Output_1_304	26.543	1.11	0.049	0.1196	0.0042	0.62255	8.3612	0.293621	0.0677	0.0034	0.573046	0.0677	0.0034	800	100	110	728	12	24	757	24	25	3.83091	728	24	1.11	0.049	0.1196	0.0042	0.62255	Zircon	323	38	10.7	1.6	492000	17000	81.8	3.2	0.061	0.033	12.26	0.62	1.66	0.36	0.89	0.18	60.8
T #443	Output_1_305	26.188	3.43	0.2	0.2632	0.01	0.545928	3.79939	0.144354	0.0952	0.0055	0.549468	0.0952	0.0055	1470	100	110	1505	30	51	1502	47	48	0.199734	1470	110	3.43	0.2	0.2632	0.01	0.545928	Zircon	481	44	13.2	1.5	483000	16000	55.6	2.2	0.163	0.061	119.4	4	7.9	1	2.24	0.28	202.5
T #445	Output_1_307	26.188	2.36	0.13	0.216	0.0081	0.562745	4.62963	0.173611	0.0795	0.0049	0.519774	0.0795	0.0049	1120	120	130	1260	26	43	1225	39	40	2.85714	1120	130	2.36	0.13	0.216	0.0081	0.562745	Zircon	191	33	6.8	1.5	481000	13000	53.9	1.8	0.006	0.012	2.29	0.2	3.46	0.53	0.41	0.11	119.3
T #446	Output_1_308	26.191	2.33	0.11	0.2108	0.0077	0.611939	4.74383	0.17328	0.0798	0.0042	0.570162	0.0798	0.0042	1137	96	110	1233	23	41	1212	32	33	1.73267	1137	110	2.33	0.11	0.2108	0.0077	0.611939	Zircon	501	51	5.6	1.3	492000	17000	57	2.3	-0.0003	0.0043	38.5	1.9	2.51	0.5	1.81	0.24	187
T #448	Output_1_310	26.188	2.14	0.12	0.1956	0.0071	0.543408	5.11247	0.185576	0.0787	0.004	0.581178	0.0787	0.004	1111	95	100	1151	21	39	1149	37	38	0.174064	1111	100	2.14	0.12	0.1956	0.0071	0.543408	Zircon	550	52	6.9	1.6	508000	13000	57.5	2.3	-0.0027	0.00013	6.31	0.39	0.59	0.24	0.15	0.065	109.9
T #449	Output_1_311	25.836	1.69	0.16	0.1617	0.0077	0.449339	6.18429	0.29449	0.0753	0.0076	0.426697	0.0753	0.0076	870	210	210	965	32	42	970	63	63	0.515464	965	42	1.69	0.16	0.1617	0.0077	0.449339	Zircon	689	51	18.9	2.4	505000	15000	56.1	2.3	-0.002703	9.9e-05	1.09	0.15	2.66	0.55	0.056	0.044	157.3
T #457	Output_1_315	26.188	3.29	0.16	0.2563	0.0091	0.589652	3.90168	0.13853	0.0923	0.0045	0.58869	0.0923	0.0045	1426	90	99	1470	24	46	1466	38	39	0.272851	1426	99	3.29	0.16	0.2563	0.0091	0.589652	Zircon	442	51	9.1	1.7	510000	14000	60.7	2.4	0.32	0.14	73.9	2.8	4.44	0.79	1.99	0.23	151.7
T #458	Output_1_316	26.543	1.373	0.095	0.1493	0.0056	0.476574	6.69792	0.251228	0.0665	0.0048	0.461106	0.0665	0.0048	740	150	150	897	19	32	870	39	40	3.10345	897	32	1.373	0.095	0.1493	0.0056	0.476574	Zircon	180	36	5.5	1.1	503000	16000	58.3	1.9	-0.002359	8.1e-05	7.64	0.41	0.53	0.22	0.066	0.038	40.2
T #460	Output_1_318	26.188	7.26	0.28	0.3936	0.014	0.677954	2.54065	0.0903687	0.1332	0.0056	0.64589	0.1332	0.0056	2113	66	76	2138	31	63	2134	33	35	0.187441	2113	76	7.26	0.28	0.3936	0.014	0.677954	Zircon	125	36	5.6	1.4	504000	15000	58.2	2.3	0	0.005	11	0.56	0.48	0.2	0.036	0.035	38
T #462	Output_1_320	25.836	2.31	0.1	0.2062	0.007	0.61708	4.84966	0.164634	0.0812	0.0041	0.557949	0.0812	0.0041	1190	91	100	1208	16	37	1205	31	33	0.248963	1190	100	2.31	0.1	0.2062	0.007	0.61708	Zircon	165	42	5.9	1.2	504000	13000	60.3	2.1	0.021	0.019	43.1	1.9	1.59	0.4	0.99	0.18	64.9
T #471	Output_1_325	26.191	19.83	0.82	0.61	0.022	0.657296	1.63934	0.0591239	0.2368	0.0099	0.653196	0.2368	0.0099	3076	57	66	3065	48	89	3070	37	39	0.162866	3076	66	19.83	0.82	0.61	0.022	0.657296	Zircon	377	42	3.7	1	506000	12000	59.2	2.2	-0.00256	0.00012	6.69	0.38	3.23	0.49	2.01	0.23	245.1
T #474	Output_1_328	26.539	1.89	0.1	0.1796	0.0065	0.564577	5.56793	0.201512	0.0767	0.0044	0.533573	0.0767	0.0044	1040	110	120	1064	20	36	1065	35	36	0.0938967	1040	120	1.89	0.1	0.1796	0.0065	0.564577	Zircon	405	39	16	2.6	517000	17000	58	2.1	0.01	0.015	4.17	0.31	2.19	0.48	0.69	0.13	106.4
T #475	Output_1_329	26.188	3.734	0.11	0.2727	0.0093	0.756756	3.66703	0.125058	0.0992	0.0029	0.75923	0.0992	0.0029	1608	37	53	1554	21	47	1574	22	24	1.27065	1608	53	3.734	0.11	0.2727	0.0093	0.756756	Zircon	517	46	10.7	1.5	497000	14000	56.7	2.2	0.046	0.027	9.25	0.75	2.74	0.62	1.59	0.32	115.6
Pb loss
T #455	Output_1_313	26.188	0.53	0.043	0.0651	0.0025	0.427827	15.361	0.5899	0.0586	0.0049	0.417352	0.0586	0.0049	430	170	170	406.7	8.9	15	424	28	29	4.08019	406.7	15	0.53	0.043	0.0651	0.0025	0.427827	Zircon	412	41	3.6	1.1	497000	10000	55.4	1.9	-0.00248	0.0001	1	0.14	0.27	0.15	0.014	0.02	75.1
T #456	Output_1_314	26.188	0.283	0.018	0.03829	0.0013	0.470903	26.1165	0.886692	0.0531	0.0034	0.46846	0.0531	0.0034	280	130	140	242.2	3.9	8.2	251	14	14	3.50598	242.2	8.2	0.283	0.018	0.03829	0.0013	0.470903	Zircon	52	35	2.26	0.93	501000	15000	57.7	2.2	-0.00261	0.00011	18.05	0.95	0.4	0.17	0.261	0.094	27.9
Discordant
T #414	Output_1_284	26.621																														Inclusion
T #415	Output_1_285	30.716																														Inclusion
T #418	Output_1_288	26.186	1.96	0.28	0.1308	0.0074	0.368202	7.64526	0.43253	0.11	0.015	0.383211	0.11	0.015	1460	280	280	790	35	42	1041	92	92	24.1114								Zircon	203	42	17.8	3.7	515000	13000	59.7	2.1	0.17	0.1	8.04	0.55	2.47	0.47	0.86	0.21	61.9
T #419	Output_1_289	40.955																														Inclusion
T #427	Output_1_293	26.188	6.48	0.18	0.3414	0.011	0.75739	2.92911	0.0943769	0.1388	0.004	0.745359	0.1388	0.004	2204	36	51	1893	21	54	2039	22	25	7.16037								Zircon	1280	100	40.7	5	517000	14000	60.2	2.1	2.11	0.51	39.7	2.5	26.1	2.5	18.4	1.5	434
T #428	Output_1_294	26.188	16.63	0.75	0.488	0.019	0.653477	2.04918	0.0797837	0.249	0.012	0.62843	0.249	0.012	3151	65	73	2558	48	80	2898	42	44	11.7322								Zircon	92	33	18.7	3.4	509000	15000	56.9	2.2	0.0039	0.0092	7.81	0.46	0.74	0.25	0.58	0.14	26.2
T #429	Output_1_295	25.836	1.312	0.066	0.1164	0.0046	0.61776	8.59107	0.33951	0.0821	0.0038	0.649332	0.0821	0.0038	1204	87	97	710	17	27	844	29	30	15.8768								Zircon	1058	81	35.7	4.7	553000	10000	64.1	2.1	0.55	0.12	46.8	2.5	16.7	1.9	8.42	0.86	235
T #464	Output_1_322	26.188	14.18	0.56	0.4833	0.017	0.665109	2.06911	0.0727805	0.213	0.0095	0.619249	0.213	0.0095	2902	63	71	2539	40	75	2750	36	38	7.67273								Zircon	157	26	7	1.6	501000	15000	58.3	2	0.017	0.019	6.24	0.46	0.93	0.31	0.253	0.088	55.8
T #472	Output_1_326	26.188	6.47	0.21	0.3066	0.012	0.76975	3.26158	0.127655	0.1538	0.0051	0.762979	0.1538	0.0051	2376	44	56	1722	38	59	2035	26	28	15.3808								Zircon	200	47	16.1	3.4	546000	10000	63.5	1.8	0.092	0.05	9.99	0.6	2.57	0.61	1.72	0.32	73
T #476	Output_1_330	25.836	5.25	0.18	0.2623	0.0099	0.740195	3.81243	0.143893	0.1455	0.0046	0.766595	0.1455	0.0046	2290	39	51	1500	30	50	1853	27	29	19.0502								Zircon	716	62	14.4	2.1	499000	15000	55.6	2.2	0.27	0.11	12.16	0.74	7.1	0.99	4.04	0.4	131.1
T #477	Output_1_331	28.668																														Inclusion
THO-01
Autocrysts
T #497	Output_1_343	26.539	0.431	0.03	0.0623	0.0022	0.452436	16.0514	0.566822	0.0506	0.0036	0.444592	0.0506	0.0036	190	150	150	389.8	6.7	13	360	22	22	8.27778	389.8	13	0.431	0.03	0.0623	0.0022	0.452436	Zircon	859	62	2.47	0.8	490000	15000	56.6	2.3	-0.002282	7.5e-05	5.35	0.35	1.09	0.29	0.247	0.085	225.7
T #505	Output_1_351	26.543	0.621	0.073	0.0744	0.0047	0.473371	13.4409	0.849087	0.0622	0.0068	0.500317	0.0622	0.0068	480	220	230	462	25	28	472	45	45	2.11864	462	28	0.621	0.073	0.0744	0.0047	0.473371	Zircon	215	35	15.1	2.1	515000	18000	59.9	2.3	0.038	0.026	60.5	2.6	4.75	0.76	1.83	0.25	64.6
T #506	Output_1_352	26.539	0.51	0.04	0.065	0.0025	0.440294	15.3846	0.591716	0.0572	0.0044	0.447214	0.0572	0.0044	420	160	170	405.9	9.5	15	417	27	28	2.66187	405.9	15	0.51	0.04	0.065	0.0025	0.440294	Zircon	990	150	14.2	4.3	505000	17000	57	2.1	0.08	0.046	8.22	0.72	7.5	2.8	5.8	2.4	250
T #511	Output_1_353	26.539	0.53	0.048	0.0705	0.0029	0.413539	14.1844	0.583472	0.0551	0.0052	0.399564	0.0551	0.0052	310	190	190	439	12	18	423	31	32	3.78251	439	18	0.53	0.048	0.0705	0.0029	0.413539	Zircon	633	51	7.6	1.4	518000	14000	57.4	2.1	-0.002307	7.4e-05	0.69	0.12	0.62	0.21	0.087	0.049	113.4
T #517	Output_1_359	26.188	0.512	0.029	0.0685	0.0025	0.541645	14.5985	0.532793	0.0544	0.0034	0.504263	0.0544	0.0034	320	120	130	427.2	8.3	15	416	19	19	2.69231	427.2	15	0.512	0.029	0.0685	0.0025	0.541645	Zircon	1311	64	5.4	1.1	497000	14000	55.1	1.7	0.002	0.0087	1.74	0.22	1.14	0.28	0.47	0.14	253.7
T #528	Output_1_366	25.836	0.522	0.033	0.0682	0.0026	0.516408	14.6628	0.558991	0.0546	0.0036	0.500552	0.0546	0.0036	330	130	140	425.1	9	15	422	22	22	0.734597	425.1	15	0.522	0.033	0.0682	0.0026	0.516408	Zircon	1148	69	9.5	1.6	514000	15000	57.1	2	0.014	0.015	3.37	0.47	2.67	0.45	1.22	0.27	261
T #530	Output_1_368	26.188	0.508	0.039	0.069	0.0027	0.454113	14.4927	0.567108	0.0532	0.0043	0.435747	0.0532	0.0043	250	160	160	430	10	16	415	27	27	3.61446	430	16	0.508	0.039	0.069	0.0027	0.454113	Zircon	996	67	6.3	1.3	512000	16000	57.2	2.3	-0.002348	7.8e-05	0.99	0.15	0.94	0.27	0.14	0.063	213.3
T #533	Output_1_371	26.188	0.558	0.065	0.0686	0.0028	0.33068	14.5773	0.59499	0.0569	0.0064	0.341117	0.0569	0.0064	340	230	230	428	11	17	435	41	42	1.6092	428	17	0.558	0.065	0.0686	0.0028	0.33068	Zircon	197	32	14.5	1.9	493000	12000	54.7	2	0.02	0.022	11.25	0.57	5.59	0.69	1.28	0.2	128
T #540	Output_1_374	26.191	0.516	0.03	0.0648	0.0025	0.552919	15.4321	0.595374	0.0563	0.0031	0.573829	0.0563	0.0031	410	110	120	404.5	9.4	15	419	20	20	3.46062	404.5	15	0.516	0.03	0.0648	0.0025	0.552919	Zircon	1457	93	6.1	1.6	508000	16000	56.7	2.1	0.114	0.047	2.36	0.43	4.1	1.1	4.1	1.1	290
T #541	Output_1_375	26.188	0.497	0.038	0.0662	0.0025	0.442846	15.1057	0.570458	0.0536	0.0044	0.417934	0.0536	0.0044	260	160	170	413.3	8.7	15	408	24	24	1.29902	413.3	15	0.497	0.038	0.0662	0.0025	0.442846	Zircon	167	31	3.44	0.98	505000	14000	56.5	2.4	-0.002588	9.4e-05	14.85	0.8	0.66	0.24	0.406	0.098	49
T #543	Output_1_377	26.188	0.42	0.045	0.0611	0.0028	0.393253	16.3666	0.750025	0.0505	0.0057	0.376184	0.0505	0.0057	100	210	220	382	12	17	347	32	32	10.0865	382	17	0.42	0.045	0.0611	0.0028	0.393253	Zircon	324	36	5.7	1.1	500000	19000	55.3	2.2	-0.002214	8.9e-05	9.16	0.37	0.83	0.24	0.491	0.094	104.8
Xenocrysts
T #483	Output_1_333	26.188	0.878	0.074	0.0911	0.0045	0.505638	10.977	0.54222	0.0704	0.0054	0.541426	0.0704	0.0054	810	160	160	561	21	27	626	39	39	10.3834	561	27	0.878	0.074	0.0911	0.0045	0.505638	Zircon	352	80	26.3	5.2	517000	12000	60.1	1.8	0.216	0.076	17.4	1.4	13.8	3.9	14.2	3.8	146
T #484	Output_1_334	26.188	5.21	0.23	0.3272	0.012	0.639017	3.05624	0.112087	0.1175	0.0051	0.64541	0.1175	0.0051	1900	66	75	1823	34	59	1843	35	37	1.08519	1900	75	5.21	0.23	0.3272	0.012	0.639017	Zircon	880	160	3.7	1.1	490000	15000	55.9	2	2.2	1.7	19.6	4.8	6.3	2.5	0.91	0.18	87.2
T #490	Output_1_340	26.191	0.752	0.056	0.0944	0.0038	0.475528	10.5932	0.426422	0.0589	0.0048	0.442871	0.0589	0.0048	450	160	170	581	15	22	566	31	32	2.65018	581	22	0.752	0.056	0.0944	0.0038	0.475528	Zircon	226	29	13	1.7	489000	17000	55.8	2.3	0.0014	0.0073	4.23	0.32	2.58	0.41	0.54	0.12	65.7
T #491	Output_1_341	26.188	3.7	0.17	0.2742	0.011	0.657706	3.64697	0.146305	0.0985	0.0049	0.627741	0.0985	0.0049	1571	80	88	1560	36	55	1566	35	36	0.383142	1571	88	3.7	0.17	0.2742	0.011	0.657706	Zircon	362	47	6.5	1	493000	14000	59.1	2.3	0.092	0.046	36	2.3	6.2	1.1	2.65	0.4	172
T #498	Output_1_344	26.539	0.83	0.12	0.0904	0.0051	0.363515	11.0619	0.62407	0.072	0.012	0.320625	0.072	0.012	540	310	320	557	25	30	573	69	69	2.79232	557	30	0.83	0.12	0.0904	0.0051	0.363515	Zircon	208	39	27.8	3.2	494000	14000	56.5	1.9	0.034	0.027	44.6	1.7	4.31	0.66	1.59	0.19	40.7
T #499	Output_1_345	26.188	0.662	0.046	0.0812	0.0031	0.48153	12.3153	0.470164	0.0591	0.0044	0.456296	0.0591	0.0044	490	150	160	503	12	19	509	28	28	1.17878	503	19	0.662	0.046	0.0812	0.0031	0.48153	Zircon	217	38	14.7	6	476000	18000	58.1	2.3	0.067	0.039	27.5	1.1	1.06	0.28	0.229	0.071	83.6
T #501	Output_1_347	25.836	0.724	0.06	0.083	0.0033	0.432554	12.0482	0.479025	0.0658	0.006	0.399683	0.0658	0.006	640	190	190	514	13	20	542	35	35	5.16605	514	20	0.724	0.06	0.083	0.0033	0.432554	Zircon	192	51	29.8	3.8	557000	11000	63.7	2.1	0.062	0.039	6.37	0.43	2.71	0.61	1.48	0.27	35
T #503	Output_1_349	26.191	0.815	0.049	0.0914	0.0034	0.526153	10.9409	0.406993	0.0653	0.0042	0.500654	0.0653	0.0042	690	130	140	564	11	20	598	27	28	5.68562	564	20	0.815	0.049	0.0914	0.0034	0.526153	Zircon	490	38	13.3	1.9	503000	16000	57.8	2	0.152	0.049	5.37	0.41	3.83	0.67	2.76	0.3	123.5
T #504	Output_1_350	25.836	2.12	0.12	0.1984	0.007	0.528973	5.04032	0.177834	0.0783	0.0047	0.506733	0.0783	0.0047	1080	110	120	1166	19	37	1144	37	38	1.92308	1080	120	2.12	0.12	0.1984	0.007	0.528973	Zircon	313	37	11.3	1.6	517000	14000	61.5	2.4	0.007	0.011	19.78	0.99	3.62	0.59	0.68	0.16	92.7
T #512	Output_1_354	26.539	7.65	0.3	0.3854	0.014	0.67956	2.59471	0.0942551	0.1442	0.0059	0.663921	0.1442	0.0059	2262	64	75	2100	35	65	2181	34	35	3.71389	2262	75	7.65	0.3	0.3854	0.014	0.67956	Zircon	282	39	14.3	2.6	499000	16000	54.5	1.9	0.0011	0.0068	5.41	0.42	1.08	0.3	0.151	0.069	64.1
T #515	Output_1_357	26.188	3.99	0.14	0.2834	0.01	0.709094	3.52858	0.124509	0.1012	0.0035	0.714163	0.1012	0.0035	1649	52	65	1607	30	53	1626	27	29	1.16851	1649	65	3.99	0.14	0.2834	0.01	0.709094	Zircon	1142	59	10.9	1.8	486000	16000	60.1	2.3	0.054	0.035	17	1.1	5.72	0.82	3.48	0.58	261
T #516	Output_1_358	26.539	2.18	0.23	0.2011	0.0094	0.405067	4.97265	0.232436	0.0778	0.0083	0.401314	0.0778	0.0083	960	230	240	1179	39	51	1136	78	79	3.78521	960	240	2.18	0.23	0.2011	0.0094	0.405067	Zircon	268	30	24.5	3.4	477000	16000	53.3	2.1	0.008	0.012	11.12	0.48	1.2	0.31	0.43	0.11	67.1
T #518	Output_1_360	26.535	1.28	0.11	0.1362	0.0052	0.406003	7.34214	0.280317	0.0679	0.0061	0.391123	0.0679	0.0061	690	190	200	823	17	29	814	51	52	1.10565	823	29	1.28	0.11	0.1362	0.0052	0.406003	Zircon	230	37	8.1	1.5	487000	12000	58.4	1.7	-0.00226	8.2e-05	7.85	0.35	1.19	0.33	0.254	0.089	70
T #520	Output_1_362	26.539	1.36	0.1	0.1423	0.0059	0.491174	7.02741	0.291368	0.0678	0.005	0.490076	0.0678	0.005	770	150	160	857	23	33	855	43	43	0.233918	857	33	1.36	0.1	0.1423	0.0059	0.491174	Zircon	366	35	5.9	1.2	512000	16000	55.6	2.1	-0.002263	8.1e-05	4.79	0.37	1.74	0.43	0.172	0.068	100.4
T #525	Output_1_363	26.188	1.516	0.068	0.1622	0.0057	0.616722	6.16523	0.216657	0.0661	0.0033	0.575601	0.0661	0.0033	796	96	110	969	15	31	936	28	29	3.52564	969	31	1.516	0.068	0.1622	0.0057	0.616722	Zircon	228	34	6.3	1.4	505000	15000	62.1	2.5	0.023	0.02	12.01	0.91	4.56	0.86	0.285	0.097	201
T #526	Output_1_364	26.188	0.86	0.18	0.0943	0.0053	0.259341	10.6044	0.596009	0.064	0.015	0.233191	0.064	0.015	190	390	390	580	26	31	545	96	96	6.42202	580	31	0.86	0.18	0.0943	0.0053	0.259341	Zircon	203	32	17.8	2	505000	16000	57.4	2.2	-0.002447	9.3e-05	4.87	0.38	0.48	0.19	0.106	0.053	43.9
T #527	Output_1_365	26.188	1.96	0.15	0.1873	0.0087	0.518852	5.33903	0.247995	0.0755	0.0055	0.537633	0.0755	0.0055	1000	130	130	1105	36	48	1086	52	52	1.74954	1000	130	1.96	0.15	0.1873	0.0087	0.518852	Zircon	219	35	14.5	2.1	521000	16000	58.3	2.4	-0.00234	8.5e-05	2.75	0.27	0.63	0.24	0.211	0.075	51.6
T #529	Output_1_367	26.188	0.696	0.067	0.0822	0.0034	0.394777	12.1654	0.503194	0.0604	0.0062	0.373749	0.0604	0.0062	470	210	210	509	14	20	522	40	40	2.49042	509	20	0.696	0.067	0.0822	0.0034	0.394777	Zircon	175	32	12.9	1.8	515000	16000	57.4	2.3	-0.002353	9.6e-05	8.38	0.5	2.22	0.51	1.08	0.19	56.1
T #531	Output_1_369	26.188	0.781	0.034	0.0973	0.0033	0.614573	10.2775	0.348569	0.0571	0.0027	0.582835	0.0571	0.0027	465	97	110	598.7	8.9	20	587	20	20	1.99319	598.7	20	0.781	0.034	0.0973	0.0033	0.614573	Zircon	403	36	4.4	1.4	514000	17000	56.1	2.3	0.0002	0.0048	1.05	0.18	0.66	0.24	0.44	0.13	78.6
T #532	Output_1_370	26.188	1.031	0.053	0.1153	0.0044	0.596059	8.67303	0.330974	0.0629	0.0029	0.637622	0.0629	0.0029	673	93	100	703	16	26	714	25	26	1.54062	703	26	1.031	0.053	0.1153	0.0044	0.596059	Zircon	180	32	5.8	1.2	504000	17000	57.5	2.5	-0.002215	8.3e-05	3.2	0.26	0.73	0.25	0.092	0.041	45.8
T #542	Output_1_376	26.191	13.77	0.46	0.533	0.019	0.729674	1.87617	0.0668804	0.1834	0.0071	0.677377	0.1834	0.0071	2664	54	65	2753	43	81	2726	29	31	0.990462	2664	65	13.77	0.46	0.533	0.019	0.729674	Zircon	227	34	13.4	1.8	499000	16000	57.5	2	0.0006	0.0056	9.24	0.51	0.85	0.28	0.203	0.072	61.7
T #544	Output_1_378	26.188	0.617	0.036	0.081	0.003	0.53592	12.3457	0.457247	0.0546	0.0035	0.500278	0.0546	0.0035	330	130	140	502	11	18	483	22	23	3.93375	502	18	0.617	0.036	0.081	0.003	0.53592	Zircon	194	28	3.8	1.2	493000	17000	57.9	2.3	0.039	0.03	8.22	0.55	1.29	0.36	0.228	0.086	86.8
T #545	Output_1_379	26.188	1.45	0.18	0.1362	0.0071	0.387177	7.34214	0.38274	0.078	0.01	0.376662	0.078	0.01	810	270	270	822	32	40	860	75	76	4.4186	822	40	1.45	0.18	0.1362	0.0071	0.387177	Zircon	266	30	24.6	9.7	485000	14000	54.3	1.9	0.104	0.044	47.1	2.4	2.51	0.41	2	0.29	109.4
T #546	Output_1_380	26.188	2.24	0.17	0.1982	0.0076	0.450961	5.04541	0.193467	0.0791	0.006	0.451148	0.0791	0.006	1100	150	150	1165	25	41	1170	52	53	0.42735	1100	150	2.24	0.17	0.1982	0.0076	0.450961	Zircon	190	28	19.6	2.4	479000	15000	54.2	1.9	0.086	0.051	9.55	0.53	1.16	0.3	0.214	0.083	58.7
T #547	Output_1_381	26.188	0.76	0.1	0.0964	0.0045	0.334354	10.3734	0.484237	0.0572	0.0083	0.306245	0.0572	0.0083	230	280	280	593	20	26	540	62	62	9.81481	593	26	0.76	0.1	0.0964	0.0045	0.334354	Zircon	161	29	15.5	1.8	494000	15000	53	2.2	0.001	0.0061	23.25	0.94	2.76	0.47	0.75	0.14	45.6
T #548	Output_1_382	26.543	1.265	0.062	0.1296	0.0049	0.610798	7.71605	0.291733	0.0695	0.0035	0.600395	0.0695	0.0035	870	100	110	785	16	28	828	29	30	5.19324	785	28	1.265	0.062	0.1296	0.0049	0.610798	Zircon	835	60	11	2	500000	13000	57.5	2.3	0.27	0.14	4.44	0.82	5.8	1.6	4.9	1.7	231
Pb loss
T #492	Output_1_342	26.543	0.451	0.027	0.0561	0.0021	0.530165	17.8253	0.667258	0.0589	0.0037	0.511901	0.0589	0.0037	490	130	140	351.9	7.4	13	375	19	19	6.16	351.9	13	0.451	0.027	0.0561	0.0021	0.530165	Zircon	1250	150	20.3	8	512000	16000	58.8	2.4	0.36	0.11	5.44	0.78	7.4	2.3	3.9	1.2	342
T #534	Output_1_372	26.188	0.326	0.031	0.0475	0.0021	0.421587	21.0526	0.930748	0.0496	0.0051	0.395004	0.0496	0.0051	80	190	190	299	9	13	281	23	23	6.40569	299	13	0.326	0.031	0.0475	0.0021	0.421587	Zircon	178	34	1.99	0.9	491000	15000	57.1	2.4	0.024	0.021	18.6	1	1.14	0.31	0.322	0.085	73.9
T #539	Output_1_373	26.188	0.394	0.027	0.0544	0.0022	0.508239	18.3823	0.743404	0.052	0.0039	0.474614	0.052	0.0039	220	140	150	341.2	9	14	338	20	21	0.946746	341.2	14	0.394	0.027	0.0544	0.0022	0.508239	Zircon	738	52	41	6.4	503000	13000	58.8	2.1	0.29	0.073	24	1.1	22.2	1.7	13.2	1	360
Discordant
T #485	Output_1_335	26.539	0.677	0.06	0.0728	0.0028	0.398102	13.7363	0.528318	0.0666	0.0056	0.415966	0.0666	0.0056	710	180	180	453	10	17	513	35	35	11.6959								Zircon	104	33	28.5	9.6	539000	12000	61.3	1.8	0.69	0.18	13.94	0.66	2.71	0.55	1.07	0.21	57.2
T #486	Output_1_336	26.535	5.03	0.63	0.241	0.024	0.622353	4.14938	0.413216	0.1378	0.01	0.808182	0.1378	0.01	2110	160	170	1370	120	130	1670	140	140	17.9641								Zircon	175	38	3.4	0.92	489000	17000	55.5	2.3	0.007	0.011	11.49	0.58	1.06	0.3	0.46	0.12	62.1
T #487	Output_1_337	26.191	0.93	0.12	0.0679	0.0031	0.333564	14.7275	0.672391	0.101	0.013	0.3343	0.101	0.013	1360	240	240	423	14	18	636	59	59	33.4906								Zircon	747	45	28	15	516000	15000	58.4	2.1	0.005	0.01	1.39	0.16	1.59	0.39	0.4	0.11	156.4
T #488	Output_1_338	26.188	5.2	0.26	0.277	0.011	0.621933	3.61011	0.143362	0.1356	0.0056	0.693124	0.1356	0.0056	2161	65	76	1574	37	56	1839	38	40	14.41								Zircon	961	78	48.6	6	485000	15000	55.7	1.9	0.75	0.13	24.5	1.6	28.1	2.6	21.5	2.2	373
T #489	Output_1_339	26.188	1.5	0.14	0.13	0.0056	0.419058	7.69231	0.331361	0.0854	0.0081	0.413519	0.0854	0.0081	1170	180	190	787	23	32	912	52	53	13.7061								Inclusion
T #500	Output_1_346	26.188	0.632	0.036	0.0721	0.0027	0.54934	13.8696	0.51939	0.0642	0.0036	0.555365	0.0642	0.0036	700	110	120	448.6	9.4	16	493	21	22	9.00609								Zircon	734	51	30.1	4.1	498000	17000	57.9	2.2	0.429	0.093	19.2	1.1	20.2	1.7	12.7	1.2	229
T #502	Output_1_348	26.188	17.56	0.49	0.4988	0.018	0.791081	2.00481	0.0723469	0.2561	0.0075	0.776482	0.2561	0.0075	3215	32	46	2607	38	76	2961	24	27	11.9554								Zircon	285	38	18.5	2.5	506000	16000	59	2.3	0.071	0.037	23.2	1.2	7.6	1.1	7.62	0.76	129.2
T #513	Output_1_355	26.191	2.27	0.1	0.1735	0.0064	0.641999	5.76369	0.212609	0.0957	0.0045	0.617219	0.0957	0.0045	1515	81	91	1031	20	35	1198	34	35	13.9399								Zircon	517	70	19.6	2.4	478000	16000	53.2	2.1	0.28	0.11	10.49	0.66	5.12	0.75	3.4	0.31	107.8
T #514	Output_1_356	26.539	2.09	0.12	0.1577	0.007	0.611628	6.34115	0.281472	0.0962	0.0058	0.592879	0.0962	0.0058	1480	110	110	943	28	39	1137	39	40	17.0624								Zircon	443	81	16.9	4.3	492000	15000	54.8	1.9	0.36	0.11	15.79	0.92	11.3	2.7	7.9	1.9	118
T #519	Output_1_361	26.191	0.59	0.055	0.063	0.0026	0.404816	15.873	0.655077	0.0692	0.007	0.377753	0.0692	0.007	700	200	210	393	11	16	460	34	34	14.5652								Zircon	513	45	62.8	6.7	529000	12000	63.2	2.3	0.54	0.19	15.52	0.85	14.2	1.8	13.5	1.2	256
LOL3-01
Autocrysts
T #588	Output_1_410	26.188	0.546	0.05	0.0675	0.0028	0.412619	14.8148	0.614541	0.0575	0.0054	0.404042	0.0575	0.0054	370	190	190	421	11	17	433	33	33	2.77136	421	17	0.546	0.05	0.0675	0.0028	0.412619	Zircon	298	39	48	17	545000	13000	62.1	2	0.49	0.13	18.07	0.8	4.28	0.7	0.92	0.19	135.3
T #601	Output_1_419	26.188	0.67	0.16	0.0668	0.0034	0.208454	14.9701	0.761949	0.063	0.01	0.305345	0.063	0.01	510	270	270	416	16	20	452	54	54	7.9646	416	20	0.67	0.16	0.0668	0.0034	0.208454	Zircon	253	34	11.3	2.3	521000	14000	59.2	2.1	0.098	0.042	11.11	0.63	2.52	0.47	0.94	0.18	104.7
T #613	Output_1_427	26.188	0.497	0.038	0.0681	0.0025	0.432832	14.6843	0.539071	0.0503	0.0038	0.437064	0.0503	0.0038	170	150	160	424.7	8.3	15	404	25	25	5.12376	424.7	15	0.497	0.038	0.0681	0.0025	0.432832	Zircon	1294	69	8.9	1.4	484000	19000	55.7	2.4	0.059	0.031	5.5	0.43	1.3	0.33	0.68	0.13	260.6
T #615	Output_1_429	26.188	0.578	0.048	0.0682	0.0025	0.403819	14.6628	0.537491	0.0585	0.005	0.394163	0.0585	0.005	450	180	180	425.3	8.8	15	454	31	31	6.32159	425.3	15	0.578	0.048	0.0682	0.0025	0.403819	Zircon	298	47	10.3	2	506000	14000	58.9	2.1	0.043	0.03	19.2	1.1	6.14	0.8	3.11	0.34	311
Xenocrysts
T #553	Output_1_383	26.191	0.594	0.049	0.0759	0.0031	0.443711	13.1752	0.538119	0.0556	0.0049	0.420484	0.0556	0.0049	350	180	180	471	12	18	476	32	32	1.05042	471	18	0.594	0.049	0.0759	0.0031	0.443711	Zircon	244	40	3.7	1.1	518000	17000	58	2.2	-0.002265	8.2e-05	7.53	0.64	1.7	0.49	0.48	0.13	106
T #554	Output_1_384	26.539	4.71	0.24	0.3231	0.012	0.589019	3.09502	0.11495	0.1043	0.0052	0.597403	0.1043	0.0052	1653	90	99	1803	36	60	1753	41	42	2.85225	1653	99	4.71	0.24	0.3231	0.012	0.589019	Zircon	466	41	11.9	1.8	521000	17000	56.9	2.2	-0.002357	8.7e-05	2.86	0.27	0.94	0.3	0.47	0.14	94.2
T #555	Output_1_385	26.188	0.615	0.053	0.0839	0.0034	0.425536	11.919	0.483009	0.0512	0.0041	0.451535	0.0512	0.0041	190	160	160	519	13	20	477	32	32	8.80503	519	20	0.615	0.053	0.0839	0.0034	0.425536	Zircon	1400	120	9	1.6	521000	17000	58.6	2.4	-0.002289	8.6e-05	2.49	0.25	1.17	0.34	0.5	0.13	343
T #556	Output_1_386	26.188	0.563	0.056	0.0746	0.0031	0.385487	13.4048	0.557037	0.0542	0.0057	0.367488	0.0542	0.0057	230	200	200	463	12	18	441	36	36	4.98866	463	18	0.563	0.056	0.0746	0.0031	0.385487	Zircon	219	34	4.6	1.2	508000	16000	57.5	2	-0.002289	7.4e-05	13.3	0.7	0.76	0.29	0.47	0.12	78.6
T #557	Output_1_387	26.535	3.45	0.15	0.2719	0.0099	0.642041	3.67782	0.133911	0.0896	0.004	0.632036	0.0896	0.004	1405	79	90	1550	27	50	1505	35	36	2.99003	1405	90	3.45	0.15	0.2719	0.0099	0.642041	Zircon	222	37	17.7	3.4	512000	19000	60.3	2.4	-0.0002	0.0042	23.5	1.2	1.07	0.29	0.128	0.059	66
T #558	Output_1_388	26.188	0.59	0.047	0.0709	0.0028	0.444167	14.1044	0.557013	0.0591	0.0046	0.452478	0.0591	0.0046	480	160	170	441	11	17	463	30	30	4.75162	441	17	0.59	0.047	0.0709	0.0028	0.444167	Zircon	508	39	14.1	2.6	520000	15000	61.3	2.5	0.68	0.12	20.6	1.2	8.2	0.93	2.01	0.29	217
T #560	Output_1_390	26.539	0.733	0.043	0.089	0.0032	0.522565	11.236	0.403989	0.059	0.0035	0.518326	0.059	0.0035	500	120	130	549	11	19	553	25	26	0.723327	549	19	0.733	0.043	0.089	0.0032	0.522565	Zircon	278	33	27.6	3.2	545000	13000	60.4	1.9	0.0034	0.0086	4.43	0.41	3.53	0.6	0.151	0.067	72.5
T #561	Output_1_391	26.184	1.154	0.07	0.137	0.0053	0.537718	7.29927	0.28238	0.0611	0.0038	0.528186	0.0611	0.0038	590	120	130	827	19	30	776	34	34	6.57216	827	30	1.154	0.07	0.137	0.0053	0.537718	Zircon	375	39	14.5	1.9	517000	16000	56.7	2.2	-0.00233	0.00012	0.21	0.071	0.38	0.17	0.46	0.15	47.6
T #562	Output_1_392	26.188	0.656	0.062	0.0879	0.0034	0.378769	11.3766	0.440049	0.0538	0.0054	0.359593	0.0538	0.0054	230	190	200	543	12	20	499	37	38	8.81764	543	20	0.656	0.062	0.0879	0.0034	0.378769	Zircon	223	34	3.7	1.1	521000	16000	57.3	1.9	-0.00255	0.00011	5.73	0.59	0.22	0.14	0.1	0.054	42.2
T #568	Output_1_394	26.188	0.587	0.03	0.0717	0.0025	0.563575	13.947	0.486297	0.0596	0.0031	0.55682	0.0596	0.0031	534	99	110	446.5	7.4	15	466	18	19	4.18455	446.5	15	0.587	0.03	0.0717	0.0025	0.563575	Zircon	686	65	38.7	4.3	495000	14000	73.4	3	7.24	0.7	65.7	4.6	50.9	4.4	3.26	0.44	252
T #569	Output_1_395	26.191	0.585	0.042	0.077	0.0029	0.464544	12.987	0.489121	0.0543	0.0039	0.4644	0.0543	0.0039	330	150	160	478	10	17	466	28	28	2.57511	478	17	0.585	0.042	0.077	0.0029	0.464544	Zircon	225	36	2.73	0.94	515000	16000	58.9	2.4	0.0052	0.0089	11.86	0.63	0.92	0.28	0.53	0.13	77.5
T #570	Output_1_396	26.539	0.592	0.049	0.0791	0.0029	0.404991	12.6422	0.463495	0.0532	0.0044	0.405251	0.0532	0.0044	240	160	170	490.9	9.7	17	463	31	31	6.02592	490.9	17	0.592	0.049	0.0791	0.0029	0.404991	Zircon	231	29	7.9	5.4	511000	16000	59	2.1	0.0012	0.0068	14.88	0.8	1.23	0.36	0.51	0.11	117.8
T #574	Output_1_400	26.188	5.2	0.15	0.3434	0.011	0.7431	2.91206	0.0932808	0.108	0.0033	0.723593	0.108	0.0033	1755	40	55	1902	20	54	1848	22	24	2.92208	1755	55	5.2	0.15	0.3434	0.011	0.7431	Zircon	470	42	15.9	2.3	513000	14000	69.1	2.5	0.62	0.18	22.3	1.1	14.3	1.8	4.14	0.72	348
T #575	Output_1_401	26.188	0.563	0.043	0.0763	0.0029	0.445521	13.1062	0.498137	0.0528	0.0044	0.414971	0.0528	0.0044	250	170	170	474	10	17	451	29	29	5.09978	474	17	0.563	0.043	0.0763	0.0029	0.445521	Zircon	264	37	3.7	1.1	522000	16000	61.4	2.4	0.039	0.032	16.81	0.74	1.35	0.41	0.49	0.14	118.5
T #576	Output_1_402	26.188	0.566	0.055	0.076	0.0035	0.428263	13.1579	0.605956	0.0542	0.0057	0.40113	0.0542	0.0057	230	200	210	472	16	21	444	36	36	6.30631	472	21	0.566	0.055	0.076	0.0035	0.428263	Zircon	266	36	5.5	1.2	487000	15000	54.9	2.2	-0.002189	9e-05	8.09	0.5	0.95	0.29	0.3	0.11	75.5
T #581	Output_1_403	26.543	6.17	0.34	0.362	0.014	0.574462	2.76243	0.106834	0.1215	0.0071	0.551897	0.1215	0.0071	1931	99	110	1989	43	68	1988	47	48	0.0503018	1931	110	6.17	0.34	0.362	0.014	0.574462	Zircon	67	25	4	0.77	505000	16000	53.4	2.4	0.001	0.0062	0.386	0.091	0.027	0.043	0.015	0.026	1.92
T #583	Output_1_405	26.188	0.643	0.044	0.0729	0.003	0.515368	13.7174	0.564503	0.0629	0.0046	0.490402	0.0629	0.0046	600	150	160	453	12	18	497	27	28	8.85312	453	18	0.643	0.044	0.0729	0.003	0.515368	Inclusion
T #585	Output_1_407	26.184	0.547	0.057	0.0732	0.0034	0.407125	13.6612	0.634537	0.0519	0.005	0.434291	0.0519	0.005	230	200	200	455	16	21	431	37	37	5.56845	455	21	0.547	0.057	0.0732	0.0034	0.407125	Zircon	251	39	5	1.2	505000	17000	56.5	2.2	0.41	0.21	12	0.83	4.16	0.91	0.92	0.19	123.1
T #586	Output_1_408	26.543	3.84	0.15	0.2835	0.0094	0.647125	3.52734	0.116956	0.1139	0.0047	0.62637	0.1139	0.0047	1847	64	74	1608	18	47	1594	29	31	0.878294	1847	74	3.84	0.15	0.2835	0.0094	0.647125	Zircon	654	44	41	11	535000	16000	61.5	2.2	0.078	0.041	5.3	1.3	0.86	0.3	0.83	0.18	141.5
T #589	Output_1_411	26.188	0.575	0.07	0.0801	0.0034	0.329232	12.4844	0.529924	0.0509	0.0062	0.329068	0.0509	0.0062	90	230	230	497	14	20	442	46	46	12.4434	497	20	0.575	0.07	0.0801	0.0034	0.329232	Zircon	590	190	13.8	2.1	508000	17000	57	2.7	3.7	2.4	22.6	7	10.1	3.9	1.68	0.22	184.2
T #590	Output_1_412	25.836	0.548	0.036	0.0706	0.0028	0.516832	14.1643	0.561757	0.0547	0.0034	0.537893	0.0547	0.0034	340	120	130	440	11	17	439	23	23	0.22779	440	17	0.548	0.036	0.0706	0.0028	0.516832	Zircon	433	49	11.4	2	517000	13000	63.1	1.8	0.87	0.21	27.1	1.2	12.1	1.6	2.69	0.34	349
T #595	Output_1_413	26.191	1.17	0.14	0.1312	0.0057	0.341279	7.62195	0.331137	0.0613	0.0069	0.360079	0.0613	0.0069	470	220	220	794	23	32	750	61	62	5.86667	794	32	1.17	0.14	0.1312	0.0057	0.341279	Zircon	154	36	9.8	1.4	518000	16000	57.4	2	0.085	0.045	5.28	0.32	1.71	0.43	0.104	0.051	49.4
T #598	Output_1_416	26.188	0.626	0.053	0.0799	0.0031	0.416601	12.5156	0.485588	0.0551	0.0046	0.421449	0.0551	0.0046	320	170	170	495	11	18	484	33	33	2.27273	495	18	0.626	0.053	0.0799	0.0031	0.416601	Zircon	238	39	4.8	1.3	512000	15000	59.3	2.1	0.078	0.041	12.22	0.66	3.65	0.56	1.64	0.26	184.8
T #599	Output_1_417	26.188	0.704	0.095	0.0902	0.0041	0.319219	11.0865	0.503931	0.0545	0.0073	0.321353	0.0545	0.0073	200	260	260	556	18	24	513	55	56	8.38207	556	24	0.704	0.095	0.0902	0.0041	0.319219	Zircon	165	31	23.8	2.1	514000	17000	56.6	2.2	0.017	0.019	6.62	0.43	7.19	0.96	0.118	0.055	18.1
T #600	Output_1_418	26.543	0.557	0.04	0.0774	0.003	0.474964	12.9199	0.500771	0.0509	0.0039	0.451394	0.0509	0.0039	170	150	150	480	11	18	444	25	26	8.10811	480	18	0.557	0.04	0.0774	0.003	0.474964	Zircon	156	32	4	1.2	517000	18000	59.4	2.4	0.014	0.014	6.76	0.54	5.08	0.76	2.06	0.26	284.4
T #603	Output_1_421	26.184	2.16	0.15	0.2085	0.0077	0.469533	4.79616	0.177124	0.0726	0.0051	0.465331	0.0726	0.0051	890	140	150	1220	23	41	1148	48	49	6.27178	890	150	2.16	0.15	0.2085	0.0077	0.469533	Zircon	292	43	11.9	1.7	512000	20000	59	2.5	0.038	0.026	13.04	0.68	4.57	0.77	0.8	0.15	107.1
T #604	Output_1_422	26.188	0.65	0.05	0.0789	0.0031	0.454872	12.6743	0.497975	0.0559	0.0041	0.472204	0.0559	0.0041	440	150	160	490	12	19	506	29	30	3.16206	490	19	0.65	0.05	0.0789	0.0031	0.454872	Zircon	266	30	2.17	0.82	461000	17000	51.1	2.1	0.0019	0.0077	8.55	0.59	0.54	0.21	0.183	0.064	83.7
T #609	Output_1_423	26.188	0.639	0.038	0.0767	0.0027	0.509394	13.0378	0.458958	0.0583	0.0036	0.495254	0.0583	0.0036	470	120	130	476.3	8	16	497	23	23	4.16499	476.3	16	0.639	0.038	0.0767	0.0027	0.509394	Zircon	446	54	3.23	0.95	497000	16000	58.1	2.4	0.075	0.037	18.5	1.4	3.98	0.64	0.81	0.17	207
T #614	Output_1_428	25.836	5.08	0.28	0.3337	0.013	0.57718	2.9967	0.116743	0.1062	0.0058	0.580717	0.1062	0.0058	1696	94	100	1855	35	60	1813	47	48	2.3166	1696	100	5.08	0.28	0.3337	0.013	0.57718	Zircon	187	33	10.7	1.5	498000	17000	54.4	1.9	-0.002211	7.7e-05	5.55	0.37	0.67	0.25	0.255	0.077	62.3
T #616	Output_1_430	26.188	0.617	0.065	0.0765	0.0031	0.359012	13.0719	0.529711	0.0568	0.0059	0.363441	0.0568	0.0059	330	210	210	475	12	19	474	40	41	0.21097	475	19	0.617	0.065	0.0765	0.0031	0.359012	Zircon	189	37	3.2	1.2	494000	17000	57.6	2.4	-0.002315	8.2e-05	8.89	0.54	0.14	0.11	0.191	0.073	48.5
T #617	Output_1_431	26.188	3.61	0.13	0.2662	0.009	0.684467	3.75657	0.127007	0.0948	0.0036	0.664956	0.0948	0.0036	1514	57	68	1521	19	46	1544	27	28	1.48964	1514	68	3.61	0.13	0.2662	0.009	0.684467	Zircon	298	38	7	1.5	502000	13000	61.4	2.2	0.25	0.14	56	1.8	2.27	0.57	1.39	0.28	100.9
T #618	Output_1_432	26.188	0.576	0.039	0.0741	0.0027	0.473887	13.4953	0.491731	0.0546	0.0037	0.473577	0.0546	0.0037	350	140	150	460.6	9	16	461	26	26	0.0867679	460.6	16	0.576	0.039	0.0741	0.0027	0.473887	Zircon	227	35	4.1	1.2	501000	16000	59.8	2.3	0.239	0.073	13.78	0.78	2.95	0.6	0.65	0.14	84.7
T #623	Output_1_433	26.543	0.61	0.027	0.0797	0.0028	0.62169	12.5471	0.4408	0.054	0.0025	0.6045	0.054	0.0025	334	91	100	494.4	8.3	17	481	17	17	2.78586	494.4	17	0.61	0.027	0.0797	0.0028	0.62169	Zircon	250	38	1.58	0.75	486000	14000	59.9	2.2	0.0019	0.0081	9.95	0.55	0.85	0.27	0.14	0.068	106.7
T #625	Output_1_435	25.836	0.568	0.033	0.0715	0.0025	0.515643	13.986	0.489021	0.0562	0.0032	0.523287	0.0562	0.0032	420	110	110	445.4	7.7	15	453	21	21	1.6777	445.4	15	0.568	0.033	0.0715	0.0025	0.515643	Zircon	369	43	2.77	0.96	486000	17000	58.9	2.2	0.116	0.049	14.07	0.88	3.34	0.65	1.07	0.19	134.1
T #627	Output_1_437	26.535	3.83	0.22	0.285	0.011	0.557721	3.50877	0.135426	0.096	0.0054	0.565778	0.096	0.0054	1500	110	120	1615	31	53	1582	44	45	2.08597	1500	120	3.83	0.22	0.285	0.011	0.557721	Zircon	313	33	15.4	2.2	485000	15000	55.4	2.1	0.019	0.016	27.8	1.1	2.78	0.45	1.7	0.23	84.2
T #628	Output_1_438	26.191	0.562	0.033	0.071	0.0026	0.529172	14.0845	0.515771	0.0568	0.0037	0.490037	0.0568	0.0037	410	130	130	442.2	8.3	15	452	22	22	2.16814	442.2	15	0.562	0.033	0.071	0.0026	0.529172	Zircon	477	45	7	4.2	485000	16000	63.9	2.6	0.353	0.092	17.57	0.9	6.1	0.79	1.3	0.21	190.6
T #629	Output_1_439	25.484	0.594	0.048	0.0761	0.0032	0.46161	13.1406	0.552562	0.0562	0.0047	0.449221	0.0562	0.0047	380	160	160	472	13	19	470	29	29	0.425532	472	19	0.594	0.048	0.0761	0.0032	0.46161	Zircon	334	38	17.2	6.7	480000	17000	57	2.4	0.168	0.074	17.28	0.99	3.77	0.62	1.44	0.25	179.3
Pb loss
T #572	Output_1_398	26.188	0.404	0.042	0.0482	0.0023	0.417156	20.7469	0.989997	0.0602	0.0062	0.420394	0.0602	0.0062	470	220	220	303	11	14	336	30	31	9.82143	303	14	0.404	0.042	0.0482	0.0023	0.417156	Zircon	371	46	21.6	4	562000	12000	66.6	2.1	1.36	0.23	24.6	1.2	19.1	2	4.45	0.47	276
T #582	Output_1_404	26.188	0.234	0.026	0.03162	0.0014	0.370175	31.6256	1.40025	0.0532	0.0063	0.350207	0.0532	0.0063	200	220	230	200.6	6	8.5	213	22	22	5.8216	200.6	8.5	0.234	0.026	0.03162	0.0014	0.370175	Zircon	329	42	9.9	1.9	489000	19000	54.6	2.3	0.081	0.038	23.3	1.2	3.55	0.62	1.09	0.18	172
T #584	Output_1_406	26.188	0.103	0.022	0.01618	0.00088	0.246761	61.8047	3.36144	0.047	0.01	0.247661	0.047	0.01	-190	330	340	103.4	4.6	5.6	96	20	20	7.70833	103.4	5.6	0.103	0.022	0.01618	0.00088	0.246761	Zircon	209	38	6.5	1.4	500000	15000	56.2	2	0.016	0.016	25.1	1	4.49	0.68	3.65	0.33	127.8
T #587	Output_1_409	26.539	0.434	0.038	0.0548	0.0027	0.490404	18.2482	0.899089	0.0568	0.0053	0.46693	0.0568	0.0053	350	180	180	344	13	16	359	27	27	4.17827	344	16	0.434	0.038	0.0548	0.0027	0.490404	Zircon	683	65	21.9	5.2	557000	10000	66.8	1.9	2.48	0.44	19.8	1.3	16.4	1.7	4.65	0.54	333
T #610	Output_1_424	26.539	0.312	0.023	0.04	0.0016	0.476923	25	1	0.0553	0.0044	0.449162	0.0553	0.0044	320	160	160	252.9	6.2	9.7	276	18	18	8.36957	252.9	9.7	0.312	0.023	0.04	0.0016	0.476923	Zircon	313	73	36	20	528000	13000	60.2	2.1	1.26	0.88	26.3	2.6	3.4	1.4	0.54	0.13	89.8
T #611	Output_1_425	25.484	0.238	0.034	0.0325	0.0015	0.30743	30.7692	1.42012	0.0513	0.007	0.320409	0.0513	0.007	110	250	250	206	7	9.3	215	28	28	4.18605	206	9.3	0.238	0.034	0.0325	0.0015	0.30743	Zircon	270	31	10.7	1.9	501000	17000	57.7	2.2	0.0039	0.0087	37.8	1.7	2.1	0.41	1.03	0.2	90.7
T #612	Output_1_426	26.191	0.195	0.046	0.0294	0.0014	0.197872	34.0136	1.6197	0.047	0.011	0.199378	0.047	0.011	-280	370	370	186.8	6.9	8.9	168	37	37	11.1905	186.8	8.9	0.195	0.046	0.0294	0.0014	0.197872	Zircon	449	49	4.4	1.2	491000	17000	56.2	2.3	0.12	0.1	23.6	1.3	3.33	0.68	2.03	0.35	161.1
T #626	Output_1_436	26.531	0.128	0.02	0.01657	0.00082	0.301935	60.35	2.98654	0.0531	0.0077	0.322978	0.0531	0.0077	200	290	290	105.9	4.1	5.2	120	17	18	11.75	105.9	5.2	0.128	0.02	0.01657	0.00082	0.301935	Zircon	264	37	8	2.6	474000	18000	56.3	2.4	0.028	0.028	15.67	0.83	1.03	0.35	0.69	0.14	79.8
T #631	Output_1_440	26.188	0.219	0.03	0.0313	0.0013	0.290152	31.9489	1.32695	0.0504	0.007	0.286505	0.0504	0.007	40	260	260	198.6	5.8	8.3	195	25	25	1.84615	198.6	8.3	0.219	0.03	0.0313	0.0013	0.290152	Zircon	320	42	8.1	1.6	485000	13000	55.8	2.1	-0.002117	8.1e-05	10.13	0.68	0.92	0.26	0.36	0.12	78.4
Discordant
T #559	Output_1_389	26.539	0.186	0.044	0.01748	0.001	0.235059	57.2082	3.27278	0.077	0.02	0.215096	0.077	0.02	350	480	480	111.7	5.7	6.6	160	36	37	30.1875								Zircon	266	45	7.8	1.9	571000	12000	61.3	1.9	0.231	0.092	15.4	1.1	1.43	0.41	1.26	0.24	54.2
T #567	Output_1_393	26.535	0.251	0.058	0.0223	0.0014	0.262183	44.843	2.81526	0.08	0.019	0.25556	0.08	0.019	390	460	460	142.2	7.6	8.7	216	47	47	34.1667								Zircon	185	33	16.5	2.2	516000	16000	56.5	2.2	-0.00243	0.00012	16.62	0.8	2.27	0.45	1.16	0.18	77.1
T #571	Output_1_397	26.188	0.744	0.041	0.0989	0.0035	0.540358	10.1112	0.357829	0.0538	0.0032	0.511322	0.0538	0.0032	310	120	130	608	9.9	20	560	23	24	8.57143								Zircon	137	41	8.1	1.5	504000	17000	61	2.3	-0.00273	9.7e-05	6.48	0.47	0.075	0.07	0.43	0.12	23.3
T #573	Output_1_399	26.535	0.425	0.024	0.067	0.0028	0.594869	14.9254	0.623747	0.0544	0.0031	0.591381	0.0544	0.0031	330	110	120	418	11	17	360	17	18	16.1111								Zircon	355	36	5.2	1.3	512000	15000	61.2	2	0.34	0.099	16.5	1.2	7.1	1.3	1.72	0.35	169
T #596	Output_1_414	25.836	0.552	0.036	0.0629	0.0023	0.489054	15.8983	0.581335	0.0635	0.0049	0.42822	0.0635	0.0049	600	150	150	393.1	7.2	14	446	24	24	11.861								Zircon	222	47	37	16	530000	16000	66.5	2.8	0.26	0.11	10.54	0.71	5.35	0.95	1.79	0.27	259.3
T #597	Output_1_415	25.836	0.259	0.083	0.017	0.0014	0.248894	58.8235	4.84429	0.104	0.029	0.28324	0.104	0.029	670	550	550	108.8	7.9	8.6	216	60	60	49.6296								Zircon	206	35	13.3	2.5	536000	15000	59.3	2.4	0.005	0.011	8.28	0.56	1.19	0.36	0.94	0.18	51.9
T #602	Output_1_420	25.836	1.13	0.11	0.1069	0.0038	0.343013	9.35454	0.332528	0.074	0.0067	0.365454	0.074	0.0067	910	160	170	655	12	22	748	44	44	12.4332								Zircon	574	54	21.6	8.9	508000	17000	58.7	2.3	0.063	0.043	7.84	0.71	7.7	1.2	0.429	0.098	265
T #624	Output_1_434	26.188	0.435	0.042	0.0671	0.0028	0.396724	14.9031	0.621889	0.0535	0.0051	0.401006	0.0535	0.0051	260	190	200	419	11	17	359	29	30	16.7131								Zircon	261	39	4	1.2	483000	15000	57.2	2.4	0.08	0.038	11.35	0.65	3.51	0.59	0.66	0.14	110.8
[truncated: 24 more columns]

## Sheet: Zircon-SHRIMP
Siégel et al. (2018). Supplementary papers. Australian Journal of Earth Sciences, 65, https://doi.org/10.1080/08120099.2018.1447998
Appendix 2. Results – zircon U–Pb dating LA-ICP-MS & SHRIMP.
Spot Name	204Pb corrected % common 206Pb	U (ppm)	Th (ppm)	232Th/238U	Total 238U/206Pb	% error	Total 207Pb/206Pb	% error	204Pb corrected 238U/206Pb*	% error	204Pb corrected 207Pb*/206Pb*	% error	204Pb corrected 207Pb*/235U	% error	204Pb corrected 206Pb*/238U	% error	Error correlation	204Pb corrected 206Pb/238U Age	1 sigma error	% Discordance
EASTERN THOMSON OROGEN
BAL-01
Emplacement age
573-1.1.1	0.340894	387.051	219.449	0.585688	15.6761	1.4021	0.0555587	1.22205	15.7297	1.40531	0.0527989	1.94456	0.462814	2.39921	0.0635741	1.40531	0.585739	397.325	5.41506	-24.8514
573-2.1.1	0.00866725	1185.5	1380.5	1.20292	15.7894	1.42186	0.0550004	0.709506	15.7907	1.42189	0.0549305	0.721802	0.479636	1.59461	0.0633282	1.42189	0.891687	395.835	5.45902	3.41466
573-3.1.1	0.757926	264.464	170.838	0.667294	16.0493	1.35698	0.0586796	3.63459	16.1719	1.37831	0.0525475	5.52799	0.448016	5.69723	0.0618358	1.37831	0.241926	386.78	5.17425	-25.8078
573-4.1.1	0.904221	336.028	197.63	0.607544	16.1632	1.30946	0.0562522	1.9237	16.3107	1.33199	0.0489056	4.6269	0.413415	4.81481	0.0613094	1.33199	0.276644	383.584	4.96025	-172.734
573-5.1.1	0.367736	307.22	172.201	0.579012	15.8381	2.04593	0.057279	4.68565	15.8966	2.05258	0.0543086	5.53463	0.471049	5.90298	0.0629066	2.05258	0.347719	393.278	7.83102	-2.52705
573-6.1.1	0.433897	361.543	239.257	0.683604	16.1631	1.29032	0.0572492	3.05153	16.2336	1.30079	0.0537443	4.09736	0.456478	4.29888	0.0616008	1.30079	0.302588	385.353	4.86576	-7.14849
573-8.1.1	0.196198	562.881	385.275	0.707057	15.9395	1.20173	0.0564189	1.49269	15.9708	1.20494	0.0548354	2.01062	0.473408	2.34403	0.0626143	1.20494	0.514046	391.505	4.577	3.5614
573-9.1.1	0.102919	365.106	251.986	0.712947	15.5455	1.12409	0.0541971	1.22776	15.5615	1.12527	0.0533642	1.47253	0.472825	1.85326	0.0642613	1.12527	0.607185	401.489	4.38003	-17.1291
573-10.1.1	0.148886	406.012	247.141	0.62879	15.7636	1.62685	0.0550309	1.20124	15.7871	1.62799	0.0538273	1.53254	0.470111	2.23585	0.0633427	1.62799	0.72813	395.922	6.25162	-9.09439
573-12.1.1	0.125198	366.319	281.825	0.794733	15.813	1.45505	0.0545806	1.37462	15.8328	1.4564	0.0535683	1.69168	0.466499	2.23224	0.06316	1.4564	0.65244	394.815	5.57755	-12.2311
573-13.1.1	0.0968208	431.678	249.327	0.596636	15.6937	1.39247	0.0545197	1.19498	15.709	1.39332	0.0537368	1.41581	0.471656	1.98642	0.063658	1.39332	0.701422	397.833	5.3755	-10.8264
573-14.1.1	0.0736184	445.749	404.256	0.936841	15.6866	1.4059	0.0543675	1.20824	15.6982	1.40654	0.0537722	1.37975	0.47229	1.9703	0.0637016	1.40654	0.713873	398.098	5.43003	-10.4338
573-15.1.1	0.14948	473.833	305.732	0.666524	15.7495	1.1055	0.0554189	1.1133	15.7731	1.10694	0.054211	1.41795	0.473885	1.79886	0.0633992	1.10694	0.615356	396.265	4.25433	-4.46223
573-16.1.1	0.0673859	281.254	216.112	0.793743	16.0852	3.07311	0.0553379	1.43029	16.096	3.07348	0.0547941	1.607	0.469372	3.46824	0.0621272	3.07348	0.886177	388.549	11.5892	3.89953
573-17.1.1	0.184994	459.499	346.389	0.778717	15.5151	1.10806	0.0563767	1.14929	15.5439	1.10999	0.0548823	1.52619	0.486826	1.88715	0.0643339	1.10999	0.588184	401.929	4.32514	1.393
573-18.1.1	0.215168	293.973	172.461	0.606016	15.8886	1.19252	0.0567398	1.42752	15.9229	1.19576	0.0550034	1.96121	0.476287	2.297	0.0628027	1.19576	0.520577	392.648	4.55501	4.92745
573-19.1.1	0.215613	340.947	204.262	0.618874	15.6447	1.4479	0.054382	1.34909	15.6785	1.45021	0.0526359	1.87889	0.462892	2.37346	0.0637817	1.45021	0.611009	398.583	5.6052	-28.1428
573-20.1.1	0.536883	293.577	261.771	0.921083	15.9107	1.42828	0.0591529	1.37431	15.9965	1.43464	0.0548198	2.48419	0.472512	2.86869	0.0625135	1.43464	0.500102	390.893	5.44127	3.5606
573-22.1.1	0.253699	526.973	354.637	0.695179	15.5436	1.2301	0.0544711	1.06989	15.5831	1.23212	0.0524156	1.55937	0.463774	1.9874	0.0641719	1.23212	0.619965	400.947	4.78964	-33.0824
573-23.1.1	0.173443	390.925	240.407	0.635263	15.7744	1.13181	0.0554909	1.28614	15.8018	1.13403	0.0540892	1.69419	0.471961	2.0387	0.0632841	1.13403	0.556249	395.567	4.35098	-5.72276
573-21.1.1	0.282902	160.365	75.9974	0.489541	15.983	1.29682	0.0540086	2.04336	16.0283	1.30455	0.0517167	3.08512	0.444881	3.3496	0.0623896	1.30455	0.389465	390.142	4.93865	-44.277
573-25.1.1	0.125167	426.038	360.823	0.874874	15.7037	1.3251	0.0567537	1.19898	15.7233	1.32629	0.055744	1.46684	0.488827	1.97754	0.0635997	1.32629	0.670678	397.48	5.1125	10.4252
573-26.1.1	3.78962e-11	389.667	250.026	0.662813	15.8089	1.13438	0.0558831	1.36849	15.8089	1.13438	0.0558831	1.36849	0.487393	1.77752	0.0632553	1.13438	0.638183	395.393	4.35049	12.0508
573-27.1.1	-0.20846	370.239	260.325	0.726329	15.5575	1.13131	0.0557525	1.32189	15.5252	1.13404	0.0574312	1.68982	0.51005	2.03508	0.0644115	1.13404	0.557247	402.398	4.42386	21.4623
573-29.1.1	0.0713294	287.29	153.633	0.552414	15.6814	1.5179	0.054557	1.44248	15.6925	1.51874	0.0539803	1.64314	0.474289	2.23751	0.0637245	1.51874	0.67876	398.237	5.86513	-7.80161
573-30.1.1	0.146178	369.564	200.788	0.561239	15.3536	1.42641	0.0539244	1.33169	15.3761	1.42791	0.05274	1.69443	0.472928	2.21586	0.065036	1.42791	0.644405	406.18	5.62093	-28.7694
573-28.1.1	0.0922475	686.047	561.696	0.845761	15.485	1.07306	0.0549539	0.943866	15.4993	1.07372	0.054208	1.11058	0.482227	1.54476	0.0645189	1.07372	0.695073	403.049	4.19509	-6.34302
Common Pb
573-7.1.1	1.47946	351.388	230.36	0.677206	16.4438	1.29082	0.0624863	2.82964	16.6908	1.32828	0.0504983	6.15589	0.41716	6.29756	0.0599134	1.32828	0.21092	375.099	4.84019	-74.1917
Inherited
573-11.1.1	-1.77022e-11	836.794	122.834	0.151636	9.77382	3.17371	0.0575774	3.03408	9.77382	3.17371	0.0575774	3.03408	0.812249	4.39068	0.102314	3.17371	0.722828	627.956	18.9896	-23.3418
NORTHERN SUBSURFACE THOMSON OROGEN
STO-01
Emplacement age
575-1.1.1	0.0846123	418.036	379.084	0.936746	12.9352	1.11739	0.0573307	1.08546	12.9461	1.11819	0.056644	1.25583	0.603274	1.6815	0.0772431	1.11819	0.664994	479.646	5.16868	-0.422717
575-2.1.1	0.069794	783.078	346.142	0.456615	13.0895	1.06617	0.0571683	0.815749	13.0987	1.06655	0.056602	0.920217	0.595807	1.40866	0.0763435	1.06655	0.757138	474.26	4.87665	0.392464
575-3.1.1	0.00992085	852.137	483.691	0.586352	12.922	1.17099	0.0571599	0.754652	12.9233	1.17103	0.0570794	0.768833	0.608987	1.40086	0.0773798	1.17103	0.835935	480.464	5.42182	2.96632
575-4.1.1	0.193333	217.218	205.142	0.975569	12.8654	1.20176	0.0555888	1.49201	12.8903	1.20488	0.0540143	2.01819	0.57776	2.3505	0.0775779	1.20488	0.512606	481.649	5.5918	-30.7221
575-5.1.1	-0.0186835	890.114	522.117	0.60593	12.8973	1.05618	0.056395	0.735929	12.8949	1.05627	0.0565467	0.757926	0.604629	1.30006	0.0775499	1.05627	0.812476	481.481	4.90044	-1.66104
575-6.1.1	-0.134383	181.846	111.344	0.632505	12.9147	1.24092	0.0574318	1.59455	12.8974	1.24333	0.0585202	1.89532	0.625613	2.26674	0.0775351	1.24333	0.548512	481.393	5.7673	12.8275
575-7.1.1	-0.0506537	316.822	226.17	0.737428	12.9489	1.14261	0.0565621	1.20513	12.9423	1.14317	0.0569731	1.29996	0.606957	1.73111	0.0772657	1.14317	0.66037	479.781	5.28561	2.26555
575-8.1.1	-0.144111	123.545	88.699	0.741639	13.3033	1.34115	0.0578229	2.02448	13.2842	1.34501	0.0589879	2.42318	0.61225	2.77144	0.0752774	1.34501	0.485311	467.872	6.06997	18.0703
575-9.1.1	0.119439	433.273	295.213	0.703841	13.0929	1.25579	0.0565143	1.0779	13.1086	1.25673	0.0555441	1.30976	0.58423	1.81517	0.0762859	1.25673	0.692351	473.915	5.7422	-9.48963
575-10.1.1	-0.239721	271.132	116.202	0.442726	12.9995	1.16385	0.0568245	1.3087	12.9684	1.16692	0.0587649	1.71766	0.624788	2.07655	0.0771104	1.16692	0.56195	478.852	5.38532	14.7798
575-11.1.1	1.0852	68.2433	47.405	0.71757	12.74	2.42477	0.0565484	4.61765	12.8798	2.45221	0.0476411	8.39201	0.510006	8.74295	0.0776412	2.45221	0.280479	482.028	11.3892	-510.362
575-12.1.1	0.522013	195.615	196.661	1.03852	13.0854	1.74733	0.0572018	1.508	13.1541	1.75338	0.0529485	2.77477	0.555001	3.28233	0.0760219	1.75338	0.534188	472.334	7.98568	-46.2866
575-13.1.1	0.0509738	160.775	184.775	1.1872	12.9745	1.25915	0.0572712	1.70126	12.9811	1.26018	0.0568576	1.86256	0.603918	2.24882	0.0770349	1.26018	0.560373	478.4	5.81043	1.62569
575-14.1.1	0.118662	834.311	827.15	1.02413	12.8149	1.33125	0.0583925	0.742331	12.8302	1.33169	0.05743	0.897597	0.617175	1.60595	0.0779413	1.33169	0.829222	483.823	6.20717	4.95637
575-15.1.1	0.321918	74.7724	32.8413	0.453711	13.4404	1.4932	0.0600218	2.42602	13.4838	1.5048	0.0574158	3.65869	0.587113	3.95607	0.0741633	1.5048	0.380377	461.189	6.69753	9.46256
575-16.1.1	0.256578	159.282	171.567	1.11267	13.1273	1.26363	0.0562412	1.71731	13.1611	1.26886	0.0541537	2.48689	0.567334	2.79189	0.0759817	1.26886	0.454481	472.093	5.77612	-26.0068
575-17.1.1	0.425472	334.353	402.969	1.24499	13.1015	1.15266	0.0607653	1.15701	13.1575	1.15731	0.0573172	1.91442	0.600639	2.23705	0.0760023	1.15731	0.51734	472.217	5.26966	6.49354
575-22.1.1	0.296317	195.552	153.025	0.80835	13.0379	1.22115	0.0578295	1.5498	13.0766	1.22631	0.0554219	2.31152	0.584369	2.61667	0.0764724	1.22631	0.468654	475.032	5.61591	-11.0551
575-23.1.1	0.13501	408.56	260.035	0.657471	13.0053	1.12135	0.0564781	1.07747	13.0228	1.12251	0.0553809	1.33153	0.586349	1.74155	0.0767882	1.12251	0.644546	476.923	5.16027	-11.958
575-25.1.1	0.0405106	592.759	382.628	0.666806	12.8284	1.08405	0.056584	0.874205	12.8336	1.0843	0.0562549	0.942329	0.604383	1.43655	0.0779203	1.0843	0.754792	483.697	5.05279	-4.77055
575-26.1.1	0.224986	558.561	351.237	0.649577	12.9892	1.08828	0.058429	0.911054	13.0185	1.08984	0.0566032	1.25905	0.599489	1.66522	0.0768137	1.08984	0.654472	477.076	5.01163	-0.210761
575-18.1.1	-0.498635	68.3572	50.11	0.757252	13.1943	1.5584	0.0582488	2.70171	13.1288	1.57803	0.0622655	4.07775	0.653917	4.37244	0.0761682	1.57803	0.360904	473.211	7.19992	31.8758
575-19.1.1	0.0348209	486.437	242.328	0.514609	13.054	1.10145	0.0573864	0.996348	13.0586	1.10173	0.0571041	1.06093	0.602937	1.5295	0.076578	1.10173	0.720317	475.665	5.05185	4.1634
575-20.1.1	-0.0100694	728.483	434.854	0.61663	12.7211	1.20614	0.0565167	0.754476	12.7198	1.20618	0.0565985	0.767043	0.613514	1.42942	0.0786174	1.20618	0.843829	487.865	5.66738	-2.60557
575-21.1.1	1.77038	182.286	185.526	1.05136	12.8684	1.65679	0.0743163	1.42093	13.1004	1.69537	0.0600141	5.16135	0.631643	5.43266	0.0763338	1.69537	0.31207	474.202	7.7509	22.2984
575-27.1.1	-1.51609e-10	325.969	292.266	0.926194	12.8295	1.60732	0.0573374	1.18857	12.8295	1.60732	0.0573374	1.18857	0.616212	1.99905	0.0779455	1.60732	0.804044	483.848	7.4923	4.25559
575-28.1.1	0.0784275	852.513	419.77	0.50864	12.9622	1.06047	0.0571815	0.830929	12.9723	1.06083	0.056545	0.930514	0.601003	1.41111	0.0770871	1.06083	0.751774	478.712	4.89436	-1.06882
575-29.1.1	0.0509721	305.489	219.865	0.743466	12.765	1.35061	0.0564282	1.20844	12.7715	1.35109	0.0560139	1.32562	0.604722	1.89281	0.0782994	1.35109	0.713803	485.964	6.32444	-7.57425
575-30.1.1	-0.0411338	632.417	200.885	0.328129	13.017	1.18703	0.0573738	0.904619	13.0117	1.18726	0.0577071	0.958844	0.611501	1.5261	0.076854	1.18726	0.777973	477.317	5.46229	8.26942
575-31.1.1	0.133317	197.062	149.734	0.784908	12.842	1.2487	0.0557208	1.66333	12.8592	1.25107	0.0546358	2.05026	0.585822	2.40182	0.0777655	1.25107	0.520886	482.771	5.81921	-22.3146
Inherited
575-24.1.1	-0.0301829	1548.64	410.576	0.273869	12.2546	1.3682	0.0562277	0.597233	12.2509	1.36825	0.0564733	0.620388	0.63559	1.50233	0.0816268	1.36825	0.910754	505.826	6.65641	-7.6827
BUD-01
Emplacement age
574-1.1.1	0.261904	370.892	215.506	0.600221	13.0311	1.12469	0.0562529	1.11457	13.0654	1.12724	0.0541214	1.62745	0.571148	1.97972	0.0765383	1.12724	0.569395	475.427	5.16636	-27.3964
574-2.1.1	0.0748374	216.295	127.354	0.608228	12.745	1.51062	0.0560703	1.46311	12.7545	1.51155	0.0554617	1.67162	0.599557	2.25369	0.0784036	1.51155	0.670702	486.587	7.08429	-13.4228
574-3.1.1	0.110696	297.25	194.023	0.674266	12.9246	1.15279	0.0561885	1.25701	12.9389	1.15412	0.0552886	1.5164	0.589168	1.90564	0.0772863	1.15412	0.605635	479.905	5.33753	-13.7072
574-4.1.1	0.0441156	180.901	117.568	0.671349	13.0996	1.23224	0.0563323	1.58777	13.1054	1.23303	0.0559741	1.72205	0.588895	2.11797	0.0763043	1.23303	0.582174	474.026	5.63515	-5.21278
574-5.1.1	-0.204929	305.664	174.599	0.590063	13.1487	1.17352	0.0565884	1.21223	13.1218	1.17574	0.0582474	1.54641	0.612048	1.94261	0.0762092	1.17574	0.605238	473.456	5.36712	12.6251
574-6.1.1	0.650615	277.422	198.481	0.739056	13.1551	1.83675	0.0610765	5.21846	13.2413	1.84185	0.0557953	6.08502	0.58099	6.35766	0.0755213	1.84185	0.289705	469.334	8.33725	-5.85884
574-7.1.1	0.0778687	196.922	189.816	0.995723	13.1159	1.65019	0.0564748	1.49716	13.1261	1.65111	0.0558425	1.71409	0.586585	2.37997	0.0761842	1.65111	0.693751	473.307	7.5348	-6.32266
574-8.1.1	-0.111112	214.993	181.761	0.873327	12.8992	1.20452	0.058815	1.42851	12.8849	1.20623	0.0597136	1.65181	0.638989	2.04535	0.0776102	1.20623	0.589741	481.842	5.60021	19.4824
574-9.1.1	-0.179787	139.226	78.973	0.585949	12.9295	1.63415	0.0591243	1.82048	12.9063	1.63743	0.0605766	2.24835	0.64715	2.78141	0.0774817	1.63743	0.588704	481.074	7.59048	23.7967
574-10.1.1	-0.0967546	83.0424	41.6655	0.518295	13.0868	1.45861	0.0562851	2.42649	13.0741	1.46181	0.0570696	2.75724	0.601857	3.12077	0.076487	1.46181	0.468411	475.12	6.69556	4.00961
574-11.1.1	-0.144568	232.222	145.394	0.646761	13.025	1.18902	0.056592	1.45126	13.0062	1.19121	0.0577635	1.74389	0.612356	2.11191	0.0768863	1.19121	0.564046	477.511	5.4826	8.62383
574-12.1.1	0.531513	179.788	109.269	0.627821	12.9516	1.23516	0.0573475	1.60785	13.0208	1.24476	0.0530153	2.94671	0.561388	3.19883	0.0767999	1.24476	0.38913	476.993	5.72308	-46.4673
574-13.1.1	0.119841	330.774	315.255	0.984534	13.0073	1.13563	0.0567253	1.17142	13.0229	1.1369	0.0557518	1.42662	0.590272	1.82422	0.0767878	1.1369	0.623222	476.921	5.22639	-8.07115
574-14.1.1	0.0435774	191.384	107.834	0.582039	12.8419	1.22721	0.0575113	1.57335	12.8475	1.22798	0.0571577	1.70039	0.613417	2.09745	0.0778359	1.22798	0.585466	483.193	5.71661	3.00972
574-15.1.1	-0.0711321	235.892	162.244	0.710488	13.1841	1.18957	0.055954	1.43394	13.1747	1.19063	0.056531	1.59114	0.591625	1.98729	0.0759029	1.19063	0.599123	471.621	5.41479	0.363989
574-16.1.1	0.495952	232.142	143.38	0.638019	13.3144	1.20082	0.0568565	1.5476	13.3808	1.20941	0.0528177	2.77954	0.54425	3.03126	0.074734	1.20941	0.398981	464.613	5.42139	-46.3902
574-17.1.1	-0.11091	288.282	190.777	0.683612	12.9771	1.68613	0.0567624	1.2944	12.9627	1.68704	0.0576614	1.49212	0.613324	2.25222	0.0771443	1.68704	0.749055	479.055	7.78884	7.60017
574-18.1.1	0.15615	159.176	103.056	0.668801	13.238	1.25985	0.0577822	1.71331	13.2587	1.26308	0.0565159	2.18104	0.587722	2.52038	0.0754223	1.26308	0.501148	468.741	5.71046	0.866785
574-19.1.1	0.0872224	266.807	161.223	0.624208	12.9116	1.16119	0.0560798	1.29355	12.9229	1.16229	0.0553707	1.50566	0.590775	1.90209	0.0773821	1.16229	0.611059	480.478	5.38149	-12.9362
574-20.1.1	-0.0778433	103.907	54.837	0.545165	13.0071	1.38589	0.0567932	2.10217	12.997	1.38807	0.0574243	2.34983	0.609193	2.72919	0.076941	1.38807	0.508601	477.838	6.39286	6.13408
574-21.1.1	0.0607817	391.421	358.719	0.946694	12.775	1.3201	0.0569906	1.06951	12.7828	1.32056	0.0564969	1.19171	0.609398	1.77878	0.0782304	1.32056	0.742399	485.551	6.17649	-2.99195
574-22.1.1	0.168616	197.313	174.996	0.916161	12.9124	1.22355	0.0573008	1.53521	12.9342	1.22647	0.055931	1.99669	0.596232	2.34328	0.0773145	1.22647	0.523396	480.074	5.67404	-7.026
574-23.1.1	0.283266	230.99	152.472	0.681866	13.0729	1.18686	0.0576068	1.44218	13.11	1.1911	0.0553051	2.10882	0.581653	2.42195	0.0762777	1.1911	0.491795	473.866	5.44177	-12.041
574-24.1.1	0.237602	134	132.502	1.02145	12.8355	1.30793	0.0587537	1.80748	12.8661	1.31334	0.0568252	2.53034	0.60897	2.85087	0.0777238	1.31334	0.460679	482.522	6.10577	0.477982
SOUTHWESTERN THOMSON OROGEN
WOL-01
Emplacement age
576-1.1.1	0.367059	500.418	69.8787	0.144249	14.5443	1.09723	0.0589715	1.00374	14.5979	1.10034	0.0560039	1.59619	0.528967	1.9387	0.068503	1.10034	0.567564	427.13	4.54756	5.79884
576-2.1.1	4.643	144.305	90.6585	0.648974	14.3408	1.61208	0.0986989	6.0627	15.0391	1.85971	0.0614544	15.835	0.56342	15.9438	0.0664933	1.85971	0.116642	414.994	7.47452	37.8444
576-3.1.1	7.65684	116.165	66.0561	0.587407	13.8268	1.71787	0.13397	8.61632	14.9733	2.13715	0.0734595	21.8321	0.676444	21.9364	0.0667856	2.13715	0.0974247	416.761	8.625	61.3158
576-4.1.1	4.20256	139.262	68.0867	0.505044	14.0684	1.64153	0.096092	2.19851	14.6856	1.8767	0.062391	12.214	0.585776	12.3574	0.0680939	1.8767	0.151869	424.662	7.71281	39.4986
576-5.1.1	1.34566	280.808	165.275	0.60799	14.7175	1.35237	0.0667819	4.34685	14.9182	1.38636	0.0559098	6.8658	0.51674	7.00438	0.0670321	1.38636	0.197928	418.25	5.61436	7.0275
576-7.1.1	2.34206	270.909	213.217	0.813015	14.6865	1.37597	0.075899	3.54245	15.0387	1.46288	0.0570077	8.52742	0.522666	8.65198	0.066495	1.46288	0.16908	415.005	5.87972	16.1278
576-9.1.1	0.806133	200.788	68.4946	0.352387	14.9157	1.20956	0.0566815	1.55535	15.0369	1.22385	0.0501236	3.50776	0.459605	3.71513	0.0665029	1.22385	0.329424	415.052	4.91955	-110.264
576-10.1.1	0.151602	917.732	144.297	0.16242	14.5196	1.15877	0.055996	0.761466	14.5416	1.15943	0.0547683	0.971602	0.5193	1.51271	0.0687682	1.15943	0.76646	428.73	4.80914	-6.66089
576-11.1.1	0.38559	214.302	86.7352	0.41809	14.4507	1.71327	0.0586523	1.63328	14.5067	1.71873	0.0555324	2.64119	0.527813	3.15118	0.0689339	1.71873	0.545424	429.729	7.14509	0.951143
576-12.1.1	0.29105	757.425	730.306	0.996014	14.915	1.19949	0.0578862	0.948788	14.9586	1.20146	0.0555338	1.40948	0.51188	1.85206	0.0668513	1.20146	0.648716	417.158	4.85327	3.95683
576-13.1.1	0.705161	280.461	291.606	1.07405	14.8171	1.20838	0.060782	1.44651	14.9224	1.21992	0.0550789	2.93734	0.508919	3.1806	0.0670135	1.21992	0.383551	418.138	4.93904	-0.673846
576-14.1.1	0.354381	429.029	82.9786	0.199793	14.7042	1.3886	0.0580082	1.16135	14.7565	1.39163	0.0551412	1.82174	0.515222	2.29246	0.0677668	1.39163	0.607047	422.687	5.69356	-1.17031
576-15.1.1	1.96661	98.5718	56.3032	0.590039	14.8976	2.07966	0.0724726	4.90622	15.1964	2.13003	0.0566077	9.17143	0.513611	9.41553	0.0658049	2.13003	0.226225	410.832	8.47783	14.1835
576-16.1.1	1.49158	157.56	71.3878	0.468036	14.8319	1.30457	0.0608389	1.89616	15.0565	1.34395	0.048684	5.91682	0.445824	6.06753	0.0664165	1.34395	0.221498	414.53	5.39572	-219.478
576-17.1.1	2.08006	56.1023	25.4398	0.468417	14.5419	2.55803	0.0706529	2.85576	14.8508	2.63058	0.0538006	10.002	0.499504	10.3422	0.0673365	2.63058	0.254355	420.089	10.6984	-16.3402
576-19.1.1	0.255613	185.482	84.9538	0.47313	14.8917	1.26688	0.0599208	1.8585	14.9299	1.27334	0.0578607	2.62858	0.534354	2.92076	0.0669798	1.27334	0.435963	417.934	5.15289	20.9799
576-20.1.1	0.0506415	547.217	74.7216	0.141055	14.7715	1.08873	0.0568454	0.977067	14.779	1.08913	0.0564363	1.06995	0.52652	1.52676	0.0676636	1.08913	0.713358	422.064	4.44957	10.4524
576-23.1.1	0.677792	342.714	80.8499	0.243696	14.6031	1.13265	0.0614773	1.1281	14.7028	1.14	0.0559989	2.24386	0.525148	2.51684	0.0680144	1.14	0.452949	424.182	4.68002	6.4283
576-8.1.1	0.738275	229.944	189.759	0.852474	14.8126	1.22342	0.0589068	1.61041	14.9227	1.23748	0.05292	3.37389	0.488959	3.59367	0.0670118	1.23748	0.344349	418.127	5.00999	-29.4458
576-25.1.1	1.0963	222.793	176.441	0.818085	14.7643	1.49266	0.0599908	1.62183	14.9279	1.51046	0.0510806	4.15225	0.4718	4.41844	0.0669885	1.51046	0.341853	417.987	6.11319	-73.3148
576-26.1.1	0.0836987	630.776	116.758	0.19121	15.3776	1.08262	0.0563505	0.984791	15.3905	1.08327	0.0556748	1.13589	0.498777	1.56963	0.064975	1.08327	0.690146	405.811	4.26052	7.89237
576-27.1.1	0.464687	129.54	88.5509	0.706136	14.8817	1.33516	0.063065	1.99577	14.9511	1.3487	0.0593268	3.3502	0.547114	3.61149	0.0668845	1.3487	0.373448	417.358	5.45057	28.8411
Pb loss
576-21.1.1	2.32292	158.971	122.955	0.798968	15.372	1.2961	0.0722063	1.81411	15.7376	1.39435	0.0534154	8.18085	0.467982	8.29882	0.0635422	1.39435	0.168018	397.131	5.37029	-15.0737
Common Pb
576-18.1.1	25.718	1526.03	204.082	0.138147	11.555	1.96425	0.279549	3.85504	15.5555	3.38336	0.0776602	33.5319	0.68836	33.7021	0.0642858	3.38336	0.10039	401.637	13.1742	66.7101
Inherited
576-6.1.1	0.407549	553.196	148.714	0.277699	5.55141	1.65881	0.0927488	1.19617	5.57413	1.66142	0.089388	1.51342	2.21107	2.24739	0.1794	1.66142	0.739267	1063.7	16.2914	26.7666
